# Supplementary material for: Contrasting Marine Microbial Communities of the Fram Strait with the First Confirmed Record of Cyanobacteria Prochlorococcus marinus in the Arctic Region
Source: MDPI journal article supplement (doi:10.3390/biology12091246), 2023-09-17
Supplement: s1 [file s1]

**Table S2.** The results of assembly.

| SampleName | Total Bases | Read Count | GC (%) | Q20 (%) | Q30 (%) |
|------------|-------------|------------|--------|---------|---------|
| GR3.0m     | 51 263 369  | 111 709    | 51.36  | 98.23   | 94.34   |
| GR3.25m    | 44 591 427  | 97 920     | 50.85  | 98.27   | 94.34   |
| GR3.50m    | 48 684 583  | 106 871    | 50.93  | 98.28   | 94.48   |
| GR5.0m     | 46 073 412  | 100 812    | 51.01  | 98.35   | 94.67   |
| GR5.25m    | 55 109 757  | 121 097    | 50.01  | 98.35   | 94.69   |
| GR5.50m    | 47 850 157  | 105 060    | 50.74  | 98.28   | 94.45   |
| GR6.0m     | 49 230 172  | 107 538    | 50.85  | 98.23   | 94.35   |
| GR6.25m    | 50 741 237  | 111 056    | 50.29  | 98.27   | 94.46   |
| GR6.50m    | 42 327 077  | 93 150     | 50.8   | 98.38   | 94.72   |
| HRSH.0m    | 60 856 955  | 135 715    | 49.8   | 98.45   | 94.92   |
| HRSH.25m   | 48 296 095  | 107 635    | 49.73  | 98.31   | 94.5    |
| ISSH.0m    | 49 704 925  | 109 873    | 50.38  | 98.2    | 94.2    |
| ISSH.25m   | 48 800 462  | 107 576    | 50.04  | 98.27   | 94.39   |
| ISSH.50m   | 53 657 208  | 119 237    | 50.2   | 98.41   | 94.84   |
| NC         | 52 936 567  | 116 196    | 53.37  | 98.08   | 93.79   |

Total Bases : The total number of bases in reads identified.

Read Count : The total number of sequence reads.

GC(%) : The GC percentage in sequence reads.

Q20(%) : The percentage of bases in which the phred score is above 20.

Q30(%) : The percentage of bases in which the phred score is above 30.
