# Supplementary material for: Contrasting Marine Microbial Communities of the Fram Strait with the First Confirmed Record of Cyanobacteria Prochlorococcus marinus in the Arctic Region
Source: Biology (Basel). 2023 Sep 17;12(9):1246. doi: 10.3390/biology12091246 (PMC10525857; doi:10.3390/biology12091246)
Supplement: Supplementary file 1 [file biology-12-01246-s001.zip › Table S1.xlsx]

## Sheet: Table S1
Table S1. List of operation taxonomic units (OTUs).
Group	Organism	Kingdom	Phylum	Class	Order	Family	Genus	Species	Score	Hit	Accession_Number_1	Accession_Number_2	Accession_Number_3	GR3.0m	GR3.25m	GR3.50m	GR5.0m	GR5.25m	GR5.50m	GR6.0m	GR6.25m	GR6.50m	HRSH.0m	HRSH.25m	ISSH.0m	ISSH.25m	ISSH.50m	NC
denovo0	Bacteria; __Proteobacteria; __Gammaproteobacteria; __Cellvibrionales; __Cellvibrionaceae; __Eionea; __Eionea flava	Bacteria	__Proteobacteria	__Gammaproteobacteria	__Cellvibrionales	__Cellvibrionaceae	__Eionea	__Eionea flava	1	1	NR_137230.1	NA	NA	6845	4901	5651	6800	5838	4216	8114	5583	3667	1001	648	213	913	538	23
denovo1	Bacteria; __Proteobacteria; __Alphaproteobacteria; __Pelagibacterales; __Pelagibacteraceae; __Candidatus Pelagibacter; __Candidatus Pelagibacter ubique	Bacteria	__Proteobacteria	__Alphaproteobacteria	__Pelagibacterales	__Pelagibacteraceae	__Candidatus Pelagibacter	__Candidatus Pelagibacter ubique	1	1	NR_074224.1	NA	NA	748	3818	3027	606	3726	3603	728	1008	3037	4972	4160	1645	1412	5862	32
denovo2	Bacteria; __Bacteroidetes; __Flavobacteriia; __Flavobacteriales; __Flavobacteriaceae; __Polaribacter; __Polaribacter staleyi	Bacteria	__Bacteroidetes	__Flavobacteriia	__Flavobacteriales	__Flavobacteriaceae	__Polaribacter	__Polaribacter staleyi	1	1	NR_159336.1	NA	NA	5119	3920	2285	7570	2495	1611	8342	6230	1096	626	145	58	213	215	36
denovo3	Bacteria; __Cyanobacteria; __; __Pleurocapsales; __Xenococcaceae; __Foliisarcina; __Foliisarcina bertiogensis	Bacteria	__Cyanobacteria	__	__Pleurocapsales	__Xenococcaceae	__Foliisarcina	__Foliisarcina bertiogensis	1	1	NR_148664.1	NA	NA	237	758	884	456	3663	1068	534	4697	910	318	229	87	313	78	23
denovo4	Bacteria; __Proteobacteria; __Alphaproteobacteria; __Rhodobacterales; __Rhodobacteraceae; __Amylibacter; __Amylibacter ulvae	Bacteria	__Proteobacteria	__Alphaproteobacteria	__Rhodobacterales	__Rhodobacteraceae	__Amylibacter	__Amylibacter ulvae	1	1	NR_146351.1	NA	NA	596	182	62	635	221	114	657	40	29	759	297	334	500	175	0
denovo5	Bacteria; __Bacteroidetes; __Flavobacteriia; __Flavobacteriales; __Flavobacteriaceae; __Lacinutrix; __Lacinutrix venerupis	Bacteria	__Bacteroidetes	__Flavobacteriia	__Flavobacteriales	__Flavobacteriaceae	__Lacinutrix	__Lacinutrix venerupis	1	1	NR_145942.1	NA	NA	978	149	153	1054	100	119	1927	2933	155	1866	417	983	1437	544	40
denovo6	Bacteria; __Proteobacteria; __Gammaproteobacteria; __; __; __Sedimenticola; __Sedimenticola thiotaurini	Bacteria	__Proteobacteria	__Gammaproteobacteria	__	__	__Sedimenticola	__Sedimenticola thiotaurini	1	1	NR_136790.1	NA	NA	19	4345	1206	30	3223	1333	19	882	963	268	188	309	207	807	15
denovo7	Bacteria; __Bacteroidetes; __Flavobacteriia; __Flavobacteriales; __Cryomorphaceae; __Vicingus; __Vicingus serpentipes	Bacteria	__Bacteroidetes	__Flavobacteriia	__Flavobacteriales	__Cryomorphaceae	__Vicingus	__Vicingus serpentipes	1	1	NR_159281.1	NA	NA	0	1710	2786	13	2848	2586	0	1043	2852	233	361	242	1149	1217	0
denovo8	Bacteria; __Proteobacteria; __Gammaproteobacteria; __Cellvibrionales; __Porticoccaceae; __Porticoccus; __Porticoccus hydrocarbonoclasticus	Bacteria	__Proteobacteria	__Gammaproteobacteria	__Cellvibrionales	__Porticoccaceae	__Porticoccus	__Porticoccus hydrocarbonoclasticus	1	1	NR_118247.1	NA	NA	619	3602	1459	848	1912	1231	875	1096	709	1104	336	937	770	323	0
denovo9	Bacteria; __Proteobacteria; __Alphaproteobacteria; __Rhodobacterales; __Rhodobacteraceae; __Planktomarina; __Planktomarina temperata	Bacteria	__Proteobacteria	__Alphaproteobacteria	__Rhodobacterales	__Rhodobacteraceae	__Planktomarina	__Planktomarina temperata	1	1	NR_125550.1	NA	NA	425	763	420	368	735	344	614	659	434	1394	890	910	616	708	0
denovo10	Bacteria; __Bacteroidetes; __Flavobacteriia; __Flavobacteriales; __Flavobacteriaceae; __Tenacibaculum; __Tenacibaculum aiptasiae	Bacteria	__Bacteroidetes	__Flavobacteriia	__Flavobacteriales	__Flavobacteriaceae	__Tenacibaculum	__Tenacibaculum aiptasiae	1	1	NR_044202.1	NA	NA	313	787	423	596	2522	868	733	1294	579	152	47	18	118	696	0
denovo11	Bacteria; __Proteobacteria; __Gammaproteobacteria; __Alteromonadales; __Alteromonadaceae; __Paraglaciecola; __Paraglaciecola psychrophila	Bacteria	__Proteobacteria	__Gammaproteobacteria	__Alteromonadales	__Alteromonadaceae	__Paraglaciecola	__Paraglaciecola psychrophila	1	1	NR_043463.1	NA	NA	2353	219	154	4321	232	235	4902	460	199	1	3	0	9	21	14
denovo12	Bacteria; __Cyanobacteria; __; __Synechococcales; __Prochloraceae; __Prochlorococcus; __Prochlorococcus marinus	Bacteria	__Cyanobacteria	__	__Synechococcales	__Prochloraceae	__Prochlorococcus	__Prochlorococcus marinus	1	1	NR_125480.1	NA	NA	1	5	6	0	1	2	2	0	0	2811	1826	4000	829	283	0
denovo13	Bacteria; __Cyanobacteria; __; __Pleurocapsales; __Xenococcaceae; __Foliisarcina; __Foliisarcina bertiogensis	Bacteria	__Cyanobacteria	__	__Pleurocapsales	__Xenococcaceae	__Foliisarcina	__Foliisarcina bertiogensis	1	1	NR_148664.1	NA	NA	148	59	577	167	268	171	89	21	268	4011	2378	1760	1133	1266	17
denovo14	Bacteria; __Proteobacteria; __Gammaproteobacteria; __Alteromonadales; __Colwelliaceae; __Colwellia; __Colwellia asteriadis	Bacteria	__Proteobacteria	__Gammaproteobacteria	__Alteromonadales	__Colwelliaceae	__Colwellia	__Colwellia asteriadis	1	1	NR_116385.1	NA	NA	1091	157	105	963	327	156	1075	2061	156	2	17	0	8	27	0
denovo15	Bacteria; __Proteobacteria; __Alphaproteobacteria; __Rhodobacterales; __Rhodobacteraceae; __Amylibacter; __Amylibacter cionae	Bacteria	__Proteobacteria	__Alphaproteobacteria	__Rhodobacterales	__Rhodobacteraceae	__Amylibacter	__Amylibacter cionae	1	1	NR_158032.1	NA	NA	40	889	651	125	376	478	106	35	1059	1516	1276	594	1032	1232	0
denovo16	Bacteria; __Bacteroidetes; __Chitinophagia; __Chitinophagales; __Chitinophagaceae; __Parasediminibacterium; __Parasediminibacterium paludis	Bacteria	__Bacteroidetes	__Chitinophagia	__Chitinophagales	__Chitinophagaceae	__Parasediminibacterium	__Parasediminibacterium paludis	1	1	NR_147756.1	NA	NA	0	0	0	0	0	0	0	0	0	0	0	0	0	0	7060
denovo17	Bacteria; __Bacteroidetes; __Flavobacteriia; __Flavobacteriales; __Flavobacteriaceae; __Gilvibacter; __Gilvibacter sediminis	Bacteria	__Bacteroidetes	__Flavobacteriia	__Flavobacteriales	__Flavobacteriaceae	__Gilvibacter	__Gilvibacter sediminis	1	1	NR_114011.1	NA	NA	245	203	628	332	857	447	521	327	496	336	121	358	372	82	8
denovo18	Bacteria; __Bacteroidetes; __Flavobacteriia; __Flavobacteriales; __Cryomorphaceae; __Phaeocystidibacter; __Phaeocystidibacter marisrubri	Bacteria	__Bacteroidetes	__Flavobacteriia	__Flavobacteriales	__Cryomorphaceae	__Phaeocystidibacter	__Phaeocystidibacter marisrubri	1	1	NR_136475.1	NA	NA	389	288	215	596	274	194	525	1262	142	330	113	118	587	64	0
denovo19	Bacteria; __Proteobacteria; __Alphaproteobacteria; __Rhodobacterales; __Rhodobacteraceae; __Sulfitobacter; __Sulfitobacter profundi	Bacteria	__Proteobacteria	__Alphaproteobacteria	__Rhodobacterales	__Rhodobacteraceae	__Sulfitobacter	__Sulfitobacter profundi	1	1	NR_165714.1	NA	NA	749	953	283	1185	102	203	754	208	276	404	134	15	130	40	0
denovo20	Bacteria; __Verrucomicrobia; __Verrucomicrobiae; __Verrucomicrobiales; __Verrucomicrobiaceae; __Fucophilus; __Fucophilus fucoidanolyticus	Bacteria	__Verrucomicrobia	__Verrucomicrobiae	__Verrucomicrobiales	__Verrucomicrobiaceae	__Fucophilus	__Fucophilus fucoidanolyticus	1	1	NR_112167.1	NA	NA	0	4	1	0	0	0	1	0	0	550	275	4010	797	61	0
denovo21	Bacteria; __Verrucomicrobia; __Verrucomicrobiae; __Verrucomicrobiales; __Verrucomicrobiaceae; __Roseibacillus; __Roseibacillus ponti	Bacteria	__Verrucomicrobia	__Verrucomicrobiae	__Verrucomicrobiales	__Verrucomicrobiaceae	__Roseibacillus	__Roseibacillus ponti	1	1	NR_041622.1	NA	NA	0	40	646	0	93	662	0	3	513	589	701	2638	2350	694	0
denovo22	Bacteria; __Proteobacteria; __Gammaproteobacteria; __Cellvibrionales; __Porticoccaceae; __Porticoccus; __Porticoccus hydrocarbonoclasticus	Bacteria	__Proteobacteria	__Gammaproteobacteria	__Cellvibrionales	__Porticoccaceae	__Porticoccus	__Porticoccus hydrocarbonoclasticus	1	1	NR_118247.1	NA	NA	764	418	293	1888	409	261	1312	732	241	56	16	1	26	4	0
denovo23	Bacteria; __Bacteroidetes; __Flavobacteriia; __Flavobacteriales; __Flavobacteriaceae; __Mesoflavibacter; __Mesoflavibacter zeaxanthinifaciens	Bacteria	__Bacteroidetes	__Flavobacteriia	__Flavobacteriales	__Flavobacteriaceae	__Mesoflavibacter	__Mesoflavibacter zeaxanthinifaciens	1	1	NR_114033.1	NA	NA	24	706	371	18	671	513	40	161	502	639	570	451	477	427	0
denovo24	Bacteria; __Proteobacteria; __Gammaproteobacteria; __Pseudomonadales; __Moraxellaceae; __Moraxella; __Moraxella oblonga	Bacteria	__Proteobacteria	__Gammaproteobacteria	__Pseudomonadales	__Moraxellaceae	__Moraxella	__Moraxella oblonga	1	1	NR_112188.1	NA	NA	20	626	144	16	508	219	23	105	127	556	380	983	403	903	0
denovo25	Bacteria; __Cyanobacteria; __; __Pleurocapsales; __Dermocarpellaceae; __Stanieria; __Stanieria cyanosphaera	Bacteria	__Cyanobacteria	__	__Pleurocapsales	__Dermocarpellaceae	__Stanieria	__Stanieria cyanosphaera	1	1	NR_102468.1	NA	NA	144	25	86	100	130	66	133	28	62	2597	499	578	432	312	0
denovo26	Bacteria; __Bacteroidetes; __Flavobacteriia; __Flavobacteriales; __Cryomorphaceae; __Vicingus; __Vicingus serpentipes	Bacteria	__Bacteroidetes	__Flavobacteriia	__Flavobacteriales	__Cryomorphaceae	__Vicingus	__Vicingus serpentipes	1	1	NR_159281.1	NA	NA	11	0	9	0	51	8	9	37	3	975	646	1741	1452	271	0
denovo27	Bacteria; __Proteobacteria; __Alphaproteobacteria; __Pelagibacterales; __Pelagibacteraceae; __Candidatus Pelagibacter; __Candidatus Pelagibacter ubique	Bacteria	__Proteobacteria	__Alphaproteobacteria	__Pelagibacterales	__Pelagibacteraceae	__Candidatus Pelagibacter	__Candidatus Pelagibacter ubique	1	1	NR_074224.1	NA	NA	35	511	907	35	551	948	54	210	852	1145	1300	456	554	1891	0
denovo28	Bacteria; __Proteobacteria; __Betaproteobacteria; __Burkholderiales; __Burkholderiaceae; __Paraburkholderia; __Paraburkholderia ginsengisoli	Bacteria	__Proteobacteria	__Betaproteobacteria	__Burkholderiales	__Burkholderiaceae	__Paraburkholderia	__Paraburkholderia ginsengisoli	1	1	NR_113964.1	NA	NA	0	0	0	0	0	0	0	0	0	0	0	0	0	0	4271
denovo29	Bacteria; __Proteobacteria; __Alphaproteobacteria; __Rhodobacterales; __Rhodobacteraceae; __Octadecabacter; __Octadecabacter arcticus	Bacteria	__Proteobacteria	__Alphaproteobacteria	__Rhodobacterales	__Rhodobacteraceae	__Octadecabacter	__Octadecabacter arcticus	1	1	NR_102905.1	NA	NA	840	20	29	2134	71	25	736	30	36	7	8	1	7	3	0
denovo30	Bacteria; __Bacteroidetes; __Flavobacteriia; __Flavobacteriales; __Flavobacteriaceae; __Aquibacter; __Aquibacter zeaxanthinifaciens	Bacteria	__Bacteroidetes	__Flavobacteriia	__Flavobacteriales	__Flavobacteriaceae	__Aquibacter	__Aquibacter zeaxanthinifaciens	1	1	NR_125631.1	NA	NA	4	319	131	6	859	201	7	162	129	699	200	1457	634	384	33
denovo31	Bacteria; __Verrucomicrobia; __Verrucomicrobiae; __Verrucomicrobiales; __Rubritaleaceae; __Rubritalea; __Rubritalea marina	Bacteria	__Verrucomicrobia	__Verrucomicrobiae	__Verrucomicrobiales	__Rubritaleaceae	__Rubritalea	__Rubritalea marina	1	1	NR_043701.1	NA	NA	2	47	361	13	662	805	6	69	1886	0	0	0	0	0	0
denovo32	Bacteria; __Proteobacteria; __Alphaproteobacteria; __Rhodobacterales; __Rhodobacteraceae; __Loktanella; __Loktanella acticola	Bacteria	__Proteobacteria	__Alphaproteobacteria	__Rhodobacterales	__Rhodobacteraceae	__Loktanella	__Loktanella acticola	1	1	NR_158144.1	NA	NA	273	56	239	357	73	89	452	1243	130	112	46	4	68	7	0
denovo33	Bacteria; __Proteobacteria; __Alphaproteobacteria; __Rhodobacterales; __Rhodobacteraceae; __Sulfitobacter; __Sulfitobacter litoralis	Bacteria	__Proteobacteria	__Alphaproteobacteria	__Rhodobacterales	__Rhodobacteraceae	__Sulfitobacter	__Sulfitobacter litoralis	1	1	NR_043547.1	NA	NA	9	5	257	0	6	40	4	14	2369	4	0	0	3	186	0
denovo34	Bacteria; __Proteobacteria; __Alphaproteobacteria; __Caulobacterales; __Caulobacteraceae; __Brevundimonas; __Brevundimonas balnearis	Bacteria	__Proteobacteria	__Alphaproteobacteria	__Caulobacterales	__Caulobacteraceae	__Brevundimonas	__Brevundimonas balnearis	1	1	NR_156861.1	NA	NA	0	0	1	0	0	0	0	0	0	0	0	0	0	0	2853
denovo35	Bacteria; __Proteobacteria; __Gammaproteobacteria; __Pseudomonadales; __Moraxellaceae; __Psychrobacter; __Psychrobacter pacificensis	Bacteria	__Proteobacteria	__Gammaproteobacteria	__Pseudomonadales	__Moraxellaceae	__Psychrobacter	__Psychrobacter pacificensis	1	1	NR_114238.1	NA	NA	2713	216	200	12	6	142	13	4	25	11	6	1	3	3	179
denovo36	Bacteria; __Proteobacteria; __Alphaproteobacteria; __Rhodobacterales; __Rhodobacteraceae; __Paracoccus; __Paracoccus mangrovi	Bacteria	__Proteobacteria	__Alphaproteobacteria	__Rhodobacterales	__Rhodobacteraceae	__Paracoccus	__Paracoccus mangrovi	1	1	NR_157768.1	NA	NA	4	166	17	0	39	23	2	7	12	663	303	921	248	216	0
denovo37	Bacteria; __Cyanobacteria; __; __Pleurocapsales; __Xenococcaceae; __Foliisarcina; __Foliisarcina bertiogensis	Bacteria	__Cyanobacteria	__	__Pleurocapsales	__Xenococcaceae	__Foliisarcina	__Foliisarcina bertiogensis	1	1	NR_148664.1	NA	NA	0	0	1	1	12	0	0	1	0	877	1482	355	379	128	0
denovo38	Bacteria; __Bacteroidetes; __Flavobacteriia; __Flavobacteriales; __Flavobacteriaceae; __Lacinutrix; __Lacinutrix gracilariae	Bacteria	__Bacteroidetes	__Flavobacteriia	__Flavobacteriales	__Flavobacteriaceae	__Lacinutrix	__Lacinutrix gracilariae	1	1	NR_148656.1	NA	NA	6	56	165	4	32	242	9	118	192	1561	1326	927	2105	582	0
denovo39	Bacteria; __Proteobacteria; __Gammaproteobacteria; __Pseudomonadales; __Moraxellaceae; __Psychrobacter; __Psychrobacter pulmonis	Bacteria	__Proteobacteria	__Gammaproteobacteria	__Pseudomonadales	__Moraxellaceae	__Psychrobacter	__Psychrobacter pulmonis	1	1	NR_118026.1	NA	NA	3243	126	249	18	2	53	5	0	14	0	0	3	0	0	211
denovo40	Bacteria; __Bacteroidetes; __Flavobacteriia; __Flavobacteriales; __Cryomorphaceae; __Vicingus; __Vicingus serpentipes	Bacteria	__Bacteroidetes	__Flavobacteriia	__Flavobacteriales	__Cryomorphaceae	__Vicingus	__Vicingus serpentipes	1	1	NR_159281.1	NA	NA	106	173	140	1054	310	71	325	325	93	253	183	126	355	34	0
denovo41	Bacteria; __Proteobacteria; __Gammaproteobacteria; __Cellvibrionales; __Halieaceae; __Marimicrobium; __Marimicrobium arenosum	Bacteria	__Proteobacteria	__Gammaproteobacteria	__Cellvibrionales	__Halieaceae	__Marimicrobium	__Marimicrobium arenosum	1	1	NR_148595.1	NA	NA	4	132	357	21	145	593	14	91	589	198	351	90	287	255	21
denovo42	Bacteria; __Proteobacteria; __Gammaproteobacteria; __Thiotrichales; __Piscirickettsiaceae; __Methylophaga; __Methylophaga lonarensis	Bacteria	__Proteobacteria	__Gammaproteobacteria	__Thiotrichales	__Piscirickettsiaceae	__Methylophaga	__Methylophaga lonarensis	1	1	NR_118130.1	NA	NA	0	1057	543	1	47	366	1	16	235	105	57	38	37	130	0
denovo43	Bacteria; __Proteobacteria; __Gammaproteobacteria; __Pseudomonadales; __Pseudomonadaceae; __Azotobacter; __Azotobacter chroococcum	Bacteria	__Proteobacteria	__Gammaproteobacteria	__Pseudomonadales	__Pseudomonadaceae	__Azotobacter	__Azotobacter chroococcum	1	1	NR_114167.1	NA	NA	105	487	109	191	454	120	187	378	72	1007	442	1633	625	277	0
denovo44	; __; __; __; __; __; __		__	__	__	__	__	__	1	1	NA	NA	NA	0	1160	467	3	141	428	0	6	338	1	1	2	6	259	0
denovo45	Bacteria; __Proteobacteria; __Gammaproteobacteria; __Oceanospirillales; __Oceanospirillaceae; __Oceanobacter; __Oceanobacter kriegii	Bacteria	__Proteobacteria	__Gammaproteobacteria	__Oceanospirillales	__Oceanospirillaceae	__Oceanobacter	__Oceanobacter kriegii	1	1	NR_113758.1	NA	NA	669	142	27	1201	32	25	1176	1024	40	17	1	0	5	0	0
denovo46	Bacteria; __Cyanobacteria; __; __Pleurocapsales; __Dermocarpellaceae; __Stanieria; __Stanieria cyanosphaera	Bacteria	__Cyanobacteria	__	__Pleurocapsales	__Dermocarpellaceae	__Stanieria	__Stanieria cyanosphaera	1	1	NR_102468.1	NA	NA	92	0	11	40	102	7	124	19	7	1351	535	342	308	90	0
denovo47	Bacteria; __Bacteroidetes; __Flavobacteriia; __Flavobacteriales; __Cryomorphaceae; __Vicingus; __Vicingus serpentipes	Bacteria	__Bacteroidetes	__Flavobacteriia	__Flavobacteriales	__Cryomorphaceae	__Vicingus	__Vicingus serpentipes	1	1	NR_159281.1	NA	NA	18	24	592	48	242	294	41	248	419	31	31	30	98	2	11
denovo48	Bacteria; __Cyanobacteria; __; __Pleurocapsales; __Dermocarpellaceae; __Stanieria; __Stanieria cyanosphaera	Bacteria	__Cyanobacteria	__	__Pleurocapsales	__Dermocarpellaceae	__Stanieria	__Stanieria cyanosphaera	1	1	NR_102468.1	NA	NA	0	0	29	0	0	1	1	0	2	961	1073	251	612	603	0
denovo49	Bacteria; __Proteobacteria; __Gammaproteobacteria; __Enterobacterales; __Pectobacteriaceae; __Dickeya; __Dickeya chrysanthemi	Bacteria	__Proteobacteria	__Gammaproteobacteria	__Enterobacterales	__Pectobacteriaceae	__Dickeya	__Dickeya chrysanthemi	1	1	NR_117737.2	NA	NA	5	710	264	10	170	264	13	335	201	23	5	4	28	9	0
denovo50	Bacteria; __Bacteroidetes; __Cytophagia; __Cytophagales; __Cytophagaceae; __Emticicia; __Emticicia soli	Bacteria	__Bacteroidetes	__Cytophagia	__Cytophagales	__Cytophagaceae	__Emticicia	__Emticicia soli	1	1	NR_157720.1	NA	NA	0	43	7	3	2	3	2	1	9	0	3	0	0	0	1764
denovo51	Bacteria; __Proteobacteria; __Alphaproteobacteria; __Rhodobacterales; __Rhodobacteraceae; __Ahrensia; __Ahrensia marina	Bacteria	__Proteobacteria	__Alphaproteobacteria	__Rhodobacterales	__Rhodobacteraceae	__Ahrensia	__Ahrensia marina	1	1	NR_148642.1	NA	NA	57	464	314	69	358	370	92	97	400	832	583	615	335	450	0
denovo52	Bacteria; __Verrucomicrobia; __Verrucomicrobiae; __Verrucomicrobiales; __Verrucomicrobiaceae; __Roseibacillus; __Roseibacillus persicicus	Bacteria	__Verrucomicrobia	__Verrucomicrobiae	__Verrucomicrobiales	__Verrucomicrobiaceae	__Roseibacillus	__Roseibacillus persicicus	1	1	NR_041623.1	NA	NA	0	0	2	0	0	5	0	0	0	187	349	443	603	263	0
denovo53	Bacteria; __Bacteroidetes; __Bacteroidia; __Marinilabiliales; __Marinifilaceae; __Marinifilum; __Marinifilum albidiflavum	Bacteria	__Bacteroidetes	__Bacteroidia	__Marinilabiliales	__Marinifilaceae	__Marinifilum	__Marinifilum albidiflavum	1	1	NR_152671.1	NA	NA	0	0	0	0	0	0	0	0	0	351	278	685	231	38	0
denovo54	Bacteria; __Proteobacteria; __Gammaproteobacteria; __Cellvibrionales; __Halieaceae; __Parahaliea; __Parahaliea mediterranea	Bacteria	__Proteobacteria	__Gammaproteobacteria	__Cellvibrionales	__Halieaceae	__Parahaliea	__Parahaliea mediterranea	1	1	NR_116976.1	NA	NA	0	438	448	1	246	276	0	43	268	77	119	48	104	250	0
denovo55	Bacteria; __Proteobacteria; __Betaproteobacteria; __Burkholderiales; __Comamonadaceae; __Acidovorax; __Acidovorax monticola	Bacteria	__Proteobacteria	__Betaproteobacteria	__Burkholderiales	__Comamonadaceae	__Acidovorax	__Acidovorax monticola	1	1	NR_164911.1	NA	NA	0	17	4	0	2	4	1	1	8	0	0	0	0	2	1531
denovo56	Bacteria; __Cyanobacteria; __; __Nostocales; __Calotrichaceae; __Dulcicalothrix; __Dulcicalothrix necridiiformans	Bacteria	__Cyanobacteria	__	__Nostocales	__Calotrichaceae	__Dulcicalothrix	__Dulcicalothrix necridiiformans	1	1	NR_164867.1	NA	NA	31	6	0	33	27	0	19	68	10	585	534	72	221	76	24
denovo57	; __; __; __; __; __; __		__	__	__	__	__	__	1	1	NA	NA	NA	42	41	35	88	991	79	378	44	33	2	0	0	0	0	0
denovo58	Bacteria; __Bacteroidetes; __Flavobacteriia; __Flavobacteriales; __Cryomorphaceae; __Vicingus; __Vicingus serpentipes	Bacteria	__Bacteroidetes	__Flavobacteriia	__Flavobacteriales	__Cryomorphaceae	__Vicingus	__Vicingus serpentipes	1	1	NR_159281.1	NA	NA	0	48	59	0	42	30	0	4	52	190	195	134	343	495	0
denovo59	; __; __; __; __; __; __		__	__	__	__	__	__	1	1	NA	NA	NA	0	66	36	0	16	15	0	2	13	61	61	326	396	97	0
denovo60	Bacteria; __Proteobacteria; __Gammaproteobacteria; __; __; __Pseudohongiella; __Pseudohongiella acticola	Bacteria	__Proteobacteria	__Gammaproteobacteria	__	__	__Pseudohongiella	__Pseudohongiella acticola	1	1	NR_136444.1	NA	NA	0	1177	566	3	508	440	0	131	420	46	47	90	88	95	0
denovo61	Bacteria; __Nitrospinae; __Nitrospinia; __Nitrospinales; __Nitrospinaceae; __Nitrospina; __Nitrospina gracilis	Bacteria	__Nitrospinae	__Nitrospinia	__Nitrospinales	__Nitrospinaceae	__Nitrospina	__Nitrospina gracilis	1	1	NR_104821.1	NA	NA	0	313	449	0	50	294	0	3	231	0	0	2	18	569	0
denovo62	Bacteria; __Proteobacteria; __Alphaproteobacteria; __Rhodobacterales; __Rhodobacteraceae; __Defluviimonas; __Defluviimonas nitratireducens	Bacteria	__Proteobacteria	__Alphaproteobacteria	__Rhodobacterales	__Rhodobacteraceae	__Defluviimonas	__Defluviimonas nitratireducens	1	1	NR_157785.1	NA	NA	0	145	44	0	51	16	2	6	20	271	202	210	289	309	0
denovo63	Bacteria; __Verrucomicrobia; __Verrucomicrobiae; __Verrucomicrobiales; __Rubritaleaceae; __Rubritalea; __Rubritalea profundi	Bacteria	__Verrucomicrobia	__Verrucomicrobiae	__Verrucomicrobiales	__Rubritaleaceae	__Rubritalea	__Rubritalea profundi	1	1	NR_163649.1	NA	NA	5	15	113	2	146	557	2	27	724	2	14	2	72	197	0
denovo64	Bacteria; __Bacteroidetes; __Flavobacteriia; __Flavobacteriales; __Flavobacteriaceae; __Aquibacter; __Aquibacter zeaxanthinifaciens	Bacteria	__Bacteroidetes	__Flavobacteriia	__Flavobacteriales	__Flavobacteriaceae	__Aquibacter	__Aquibacter zeaxanthinifaciens	1	1	NR_125631.1	NA	NA	1	518	173	4	232	142	8	32	124	376	194	664	363	364	0
denovo65	Bacteria; __Proteobacteria; __Alphaproteobacteria; __Sphingomonadales; __Sphingomonadaceae; __Sphingomonas; __Sphingomonas echinoides	Bacteria	__Proteobacteria	__Alphaproteobacteria	__Sphingomonadales	__Sphingomonadaceae	__Sphingomonas	__Sphingomonas echinoides	1	1	NR_113806.1	NA	NA	5	0	4	1	0	1	6	0	2	0	0	1	0	0	1743
denovo66	Bacteria; __Verrucomicrobia; __Verrucomicrobiae; __Verrucomicrobiales; __Verrucomicrobiaceae; __Roseibacillus; __Roseibacillus persicicus	Bacteria	__Verrucomicrobia	__Verrucomicrobiae	__Verrucomicrobiales	__Verrucomicrobiaceae	__Roseibacillus	__Roseibacillus persicicus	1	1	NR_041623.1	NA	NA	1	37	184	0	42	278	0	3	199	125	187	68	193	27	0
denovo67	Bacteria; __Firmicutes; __Bacilli; __Bacillales; __Staphylococcaceae; __Macrococcus; __Macrococcus canis	Bacteria	__Firmicutes	__Bacilli	__Bacillales	__Staphylococcaceae	__Macrococcus	__Macrococcus canis	1	1	NR_156154.1	NA	NA	1153	31	83	3	1	10	2	1	0	0	0	0	0	0	0
denovo68	Bacteria; __Cyanobacteria; __; __Nostocales; __Calotrichaceae; __Dulcicalothrix; __Dulcicalothrix necridiiformans	Bacteria	__Cyanobacteria	__	__Nostocales	__Calotrichaceae	__Dulcicalothrix	__Dulcicalothrix necridiiformans	1	1	NR_164867.1	NA	NA	0	0	1	0	0	1	0	0	0	279	516	406	400	199	11
denovo69	Bacteria; __Cyanobacteria; __; __Nostocales; __Calotrichaceae; __Dulcicalothrix; __Dulcicalothrix necridiiformans	Bacteria	__Cyanobacteria	__	__Nostocales	__Calotrichaceae	__Dulcicalothrix	__Dulcicalothrix necridiiformans	1	1	NR_164867.1	NA	NA	1	20	31	3	26	14	12	3	22	693	573	178	264	134	9
denovo70	Bacteria; __Firmicutes; __Bacilli; __Lactobacillales; __Aerococcaceae; __Aerococcus; __Aerococcus viridans	Bacteria	__Firmicutes	__Bacilli	__Lactobacillales	__Aerococcaceae	__Aerococcus	__Aerococcus viridans	1	1	NR_104708.1	NA	NA	1100	13	57	2	3	12	1	0	2	0	0	0	1	1	0
denovo71	Bacteria; __Proteobacteria; __Gammaproteobacteria; __Cellvibrionales; __Porticoccaceae; __Porticoccus; __Porticoccus hydrocarbonoclasticus	Bacteria	__Proteobacteria	__Gammaproteobacteria	__Cellvibrionales	__Porticoccaceae	__Porticoccus	__Porticoccus hydrocarbonoclasticus	1	1	NR_118247.1	NA	NA	0	1	0	0	0	0	0	0	0	414	248	255	200	65	0
denovo72	Bacteria; __Bacteroidetes; __Flavobacteriia; __Flavobacteriales; __Cryomorphaceae; __Vicingus; __Vicingus serpentipes	Bacteria	__Bacteroidetes	__Flavobacteriia	__Flavobacteriales	__Cryomorphaceae	__Vicingus	__Vicingus serpentipes	1	1	NR_159281.1	NA	NA	25	288	278	44	248	133	17	5	181	4	7	0	2	0	0
denovo73	; __; __; __; __; __; __		__	__	__	__	__	__	1	1	NA	NA	NA	0	18	8	0	0	2	0	0	5	0	0	0	0	0	1363
denovo74	Bacteria; __Proteobacteria; __Alphaproteobacteria; __Rhizobiales; __Bradyrhizobiaceae; __Bradyrhizobium; __Bradyrhizobium namibiense	Bacteria	__Proteobacteria	__Alphaproteobacteria	__Rhizobiales	__Bradyrhizobiaceae	__Bradyrhizobium	__Bradyrhizobium namibiense	1	1	NR_159233.1	NA	NA	0	0	2	0	0	0	3	0	0	0	0	0	0	0	998
denovo75	Bacteria; __Bacteroidetes; __Flavobacteriia; __Flavobacteriales; __Cryomorphaceae; __Owenweeksia; __Owenweeksia hongkongensis	Bacteria	__Bacteroidetes	__Flavobacteriia	__Flavobacteriales	__Cryomorphaceae	__Owenweeksia	__Owenweeksia hongkongensis	1	1	NR_074100.1	NA	NA	3	76	666	0	396	525	1	46	714	44	95	27	272	229	0
denovo76	Bacteria; __Actinobacteria; __Actinobacteria; __Micrococcales; __Microbacteriaceae; __Candidatus Planktoluna; __Candidatus Planktoluna	Bacteria	__Actinobacteria	__Actinobacteria	__Micrococcales	__Microbacteriaceae	__Candidatus Planktoluna	__Candidatus Planktoluna	1	1	NR_125495.1	NA	NA	217	75	21	217	33	54	216	10	14	72	20	0	9	0	3
denovo77	Bacteria; __Bacteroidetes; __Flavobacteriia; __Flavobacteriales; __Flavobacteriaceae; __Mesoflavibacter; __Mesoflavibacter sabulilitoris	Bacteria	__Bacteroidetes	__Flavobacteriia	__Flavobacteriales	__Flavobacteriaceae	__Mesoflavibacter	__Mesoflavibacter sabulilitoris	1	1	NR_134082.1	NA	NA	74	127	94	50	156	114	58	219	132	102	93	83	189	202	1
denovo78	Bacteria; __Bacteroidetes; __Flavobacteriia; __Flavobacteriales; __Flavobacteriaceae; __Spongiivirga; __Spongiivirga citrea	Bacteria	__Bacteroidetes	__Flavobacteriia	__Flavobacteriales	__Flavobacteriaceae	__Spongiivirga	__Spongiivirga citrea	1	1	NR_134814.1	NA	NA	2	46	12	1	16	34	2	2	31	347	246	370	178	108	0
denovo79	Bacteria; __Proteobacteria; __Alphaproteobacteria; __Rhodospirillales; __Rhodospirillaceae; __Nisaea; __Nisaea nitritireducens	Bacteria	__Proteobacteria	__Alphaproteobacteria	__Rhodospirillales	__Rhodospirillaceae	__Nisaea	__Nisaea nitritireducens	1	1	NR_043924.1	NA	NA	0	49	164	0	21	133	0	2	94	132	158	210	142	414	0
denovo80	Bacteria; __Proteobacteria; __Gammaproteobacteria; __Alteromonadales; __Alteromonadaceae; __Alteromonas; __Alteromonas mediterranea	Bacteria	__Proteobacteria	__Gammaproteobacteria	__Alteromonadales	__Alteromonadaceae	__Alteromonas	__Alteromonas mediterranea	1	1	NR_148755.1	NA	NA	223	33	19	0	0	8	454	0	10	2	1	47	212	10	0
denovo81	Bacteria; __Bacteroidetes; __Flavobacteriia; __Flavobacteriales; __Flavobacteriaceae; __Olleya; __Olleya marilimosa	Bacteria	__Bacteroidetes	__Flavobacteriia	__Flavobacteriales	__Flavobacteriaceae	__Olleya	__Olleya marilimosa	1	1	NR_104945.2	NA	NA	0	302	180	0	109	159	0	2	116	0	3	0	0	0	0
denovo82	Bacteria; __Proteobacteria; __Alphaproteobacteria; __Pelagibacterales; __Pelagibacteraceae; __Candidatus Pelagibacter; __Candidatus Pelagibacter ubique	Bacteria	__Proteobacteria	__Alphaproteobacteria	__Pelagibacterales	__Pelagibacteraceae	__Candidatus Pelagibacter	__Candidatus Pelagibacter ubique	1	1	NR_074224.1	NA	NA	84	132	40	70	84	57	119	79	69	50	30	6	9	13	0
denovo83	Bacteria; __Firmicutes; __Bacilli; __Bacillales; __Bacillaceae; __Bacillus; __Bacillus subtilis	Bacteria	__Firmicutes	__Bacilli	__Bacillales	__Bacillaceae	__Bacillus	__Bacillus subtilis	1	1	NR_112116.2	NA	NA	1	31	4	1	0	3	1	0	1	0	0	0	0	1	1278
denovo84	Bacteria; __Proteobacteria; __Alphaproteobacteria; __Rhodospirillales; __Rhodospirillaceae; __Magnetospira; __Magnetospira thiophila	Bacteria	__Proteobacteria	__Alphaproteobacteria	__Rhodospirillales	__Rhodospirillaceae	__Magnetospira	__Magnetospira thiophila	1	1	NR_116475.1	NA	NA	3	147	219	0	48	165	3	31	214	77	34	25	36	57	0
denovo85	; __; __; __; __; __; __		__	__	__	__	__	__	1	1	NA	NA	NA	0	2	1	0	0	2	0	0	1	0	0	0	7	259	0
denovo86	; __; __; __; __; __; __		__	__	__	__	__	__	1	1	NA	NA	NA	0	0	0	1	1	0	0	0	1	153	78	398	108	16	9
denovo87	Bacteria; __Bacteroidetes; __Cytophagia; __Cytophagales; __Cytophagaceae; __Flectobacillus; __Flectobacillus rhizosphaerae	Bacteria	__Bacteroidetes	__Cytophagia	__Cytophagales	__Cytophagaceae	__Flectobacillus	__Flectobacillus rhizosphaerae	1	1	NR_137382.1	NA	NA	0	0	0	0	0	0	0	0	0	0	0	0	0	0	1167
denovo88	Bacteria; __Actinobacteria; __Actinobacteria; __Micrococcales; __Micrococcaceae; __Rothia; __Rothia dentocariosa	Bacteria	__Actinobacteria	__Actinobacteria	__Micrococcales	__Micrococcaceae	__Rothia	__Rothia dentocariosa	1	1	NR_044712.2	NA	NA	0	0	0	0	0	0	0	0	0	0	0	0	0	0	638
denovo89	Bacteria; __Proteobacteria; __Betaproteobacteria; __Burkholderiales; __Burkholderiaceae; __Limnobacter; __Limnobacter thiooxidans	Bacteria	__Proteobacteria	__Betaproteobacteria	__Burkholderiales	__Burkholderiaceae	__Limnobacter	__Limnobacter thiooxidans	1	1	NR_025421.1	NA	NA	33	10	4	74	0	0	73	0	3	71	3	147	4	0	299
denovo90	Bacteria; __Actinobacteria; __Acidimicrobiia; __Acidimicrobiales; __Acidimicrobiaceae; __Aciditerrimonas; __Aciditerrimonas ferrireducens	Bacteria	__Actinobacteria	__Acidimicrobiia	__Acidimicrobiales	__Acidimicrobiaceae	__Aciditerrimonas	__Aciditerrimonas ferrireducens	1	1	NR_112972.1	NA	NA	0	394	137	0	15	185	0	0	88	0	0	0	1	37	0
denovo91	Bacteria; __Bacteroidetes; __Flavobacteriia; __Flavobacteriales; __Cryomorphaceae; __Luteibaculum; __Luteibaculum oceani	Bacteria	__Bacteroidetes	__Flavobacteriia	__Flavobacteriales	__Cryomorphaceae	__Luteibaculum	__Luteibaculum oceani	1	1	NR_135735.1	NA	NA	0	32	181	3	61	55	0	3	39	122	150	18	137	15	0
denovo92	Bacteria; __Bacteroidetes; __Flavobacteriia; __Flavobacteriales; __Flavobacteriaceae; __Olleya; __Olleya algicola	Bacteria	__Bacteroidetes	__Flavobacteriia	__Flavobacteriales	__Flavobacteriaceae	__Olleya	__Olleya algicola	1	1	NR_157624.1	NA	NA	1	2	2	0	0	1	0	0	0	121	74	116	62	121	0
denovo93	Bacteria; __Actinobacteria; __Actinobacteria; __Micrococcales; __Micrococcaceae; __Micrococcus; __Micrococcus luteus	Bacteria	__Actinobacteria	__Actinobacteria	__Micrococcales	__Micrococcaceae	__Micrococcus	__Micrococcus luteus	1	1	NR_075062.2	NA	NA	322	66	84	8	1	10	0	0	1	0	0	0	0	0	440
denovo94	Bacteria; __Bacteroidetes; __Flavobacteriia; __Flavobacteriales; __Flavobacteriaceae; __Polaribacter; __Polaribacter haliotis	Bacteria	__Bacteroidetes	__Flavobacteriia	__Flavobacteriales	__Flavobacteriaceae	__Polaribacter	__Polaribacter haliotis	1	1	NR_153703.1	NA	NA	15	24	41	27	28	22	38	58	13	105	252	92	171	374	4
denovo95	Bacteria; __Cyanobacteria; __; __Nostocales; __Calotrichaceae; __Dulcicalothrix; __Dulcicalothrix necridiiformans	Bacteria	__Cyanobacteria	__	__Nostocales	__Calotrichaceae	__Dulcicalothrix	__Dulcicalothrix necridiiformans	1	1	NR_164867.1	NA	NA	179	14	1	176	10	3	259	19	2	0	0	0	0	0	0
denovo96	Bacteria; __Proteobacteria; __Alphaproteobacteria; __Rhodospirillales; __Rhodospirillaceae; __Azospirillum; __Azospirillum brasilense	Bacteria	__Proteobacteria	__Alphaproteobacteria	__Rhodospirillales	__Rhodospirillaceae	__Azospirillum	__Azospirillum brasilense	1	1	NR_114057.1	NA	NA	0	217	118	0	18	114	0	2	132	0	1	3	15	78	0
denovo97	; __; __; __; __; __; __		__	__	__	__	__	__	1	1	NA	NA	NA	57	3	13	99	7	16	79	5	16	39	86	11	56	13	0
denovo98	Bacteria; __Cyanobacteria; __; __Oscillatoriales; __Microcoleaceae; __Arthrospira; __Arthrospira platensis	Bacteria	__Cyanobacteria	__	__Oscillatoriales	__Microcoleaceae	__Arthrospira	__Arthrospira platensis	1	1	NR_125711.1	NA	NA	0	0	0	0	0	0	0	0	0	0	0	0	0	0	625
denovo99	Bacteria; __Actinobacteria; __Acidimicrobiia; __Acidimicrobiales; __Iamiaceae; __Aquihabitans; __Aquihabitans daechungensis	Bacteria	__Actinobacteria	__Acidimicrobiia	__Acidimicrobiales	__Iamiaceae	__Aquihabitans	__Aquihabitans daechungensis	1	1	NR_132289.1	NA	NA	1	202	112	0	39	61	0	3	60	5	9	53	109	125	0
denovo100	Bacteria; __Bacteroidetes; __Flavobacteriia; __Flavobacteriales; __Cryomorphaceae; __Luteibaculum; __Luteibaculum oceani	Bacteria	__Bacteroidetes	__Flavobacteriia	__Flavobacteriales	__Cryomorphaceae	__Luteibaculum	__Luteibaculum oceani	1	1	NR_135735.1	NA	NA	0	0	3	0	2	2	0	0	0	123	249	41	204	15	0
denovo101	Bacteria; __Bacteroidetes; __Saprospiria; __Saprospirales; __Haliscomenobacteraceae; __Portibacter; __Portibacter lacus	Bacteria	__Bacteroidetes	__Saprospiria	__Saprospirales	__Haliscomenobacteraceae	__Portibacter	__Portibacter lacus	1	1	NR_113569.1	NA	NA	0	0	0	0	0	0	0	0	1	191	120	275	144	24	14
denovo102	Bacteria; __Bacteroidetes; __Flavobacteriia; __Flavobacteriales; __Flavobacteriaceae; __Gillisia; __Gillisia myxillae	Bacteria	__Bacteroidetes	__Flavobacteriia	__Flavobacteriales	__Flavobacteriaceae	__Gillisia	__Gillisia myxillae	1	1	NR_043635.1	NA	NA	120	35	382	2	43	23	0	14	36	0	14	1	83	1	0
denovo103	Bacteria; __Proteobacteria; __Alphaproteobacteria; __Sphingomonadales; __Erythrobacteraceae; __Altererythrobacter; __Altererythrobacter deserti	Bacteria	__Proteobacteria	__Alphaproteobacteria	__Sphingomonadales	__Erythrobacteraceae	__Altererythrobacter	__Altererythrobacter deserti	1	1	NR_158128.1	NA	NA	4	28	24	14	10	7	12	8	10	13	2	4	3	4	1417
denovo104	; __; __; __; __; __; __		__	__	__	__	__	__	1	1	NA	NA	NA	56	13	21	50	5	0	25	9	0	82	88	75	92	13	0
denovo105	Bacteria; __Proteobacteria; __Gammaproteobacteria; __Alteromonadales; __Colwelliaceae; __Colwellia; __Colwellia piezophila	Bacteria	__Proteobacteria	__Gammaproteobacteria	__Alteromonadales	__Colwelliaceae	__Colwellia	__Colwellia piezophila	1	1	NR_024805.1	NA	NA	0	2	21	0	0	8	0	0	1	35	263	8	111	178	0
denovo106	; __; __; __; __; __; __		__	__	__	__	__	__	1	1	NA	NA	NA	0	38	263	0	11	153	0	0	155	2	6	2	86	263	0
denovo107	Bacteria; __Actinobacteria; __Nitriliruptoria; __Euzebyales; __Euzebyaceae; __Euzebya; __Euzebya tangerina	Bacteria	__Actinobacteria	__Nitriliruptoria	__Euzebyales	__Euzebyaceae	__Euzebya	__Euzebya tangerina	1	1	NR_112876.1	NA	NA	0	90	8	3	68	3	0	295	0	0	132	0	47	6	0
denovo108	Bacteria; __Nitrospinae; __Nitrospinia; __Nitrospinales; __Nitrospinaceae; __Nitrospina; __Nitrospina gracilis	Bacteria	__Nitrospinae	__Nitrospinia	__Nitrospinales	__Nitrospinaceae	__Nitrospina	__Nitrospina gracilis	1	1	NR_104821.1	NA	NA	0	2	108	0	12	68	0	1	70	1	0	3	23	329	0
denovo109	Bacteria; __Firmicutes; __Bacilli; __Lactobacillales; __Carnobacteriaceae; __Desemzia; __Desemzia incerta	Bacteria	__Firmicutes	__Bacilli	__Lactobacillales	__Carnobacteriaceae	__Desemzia	__Desemzia incerta	1	1	NR_044938.1	NA	NA	383	24	51	1	3	3	0	0	1	0	0	0	0	0	0
denovo110	Bacteria; __Firmicutes; __Bacilli; __Bacillales; __Staphylococcaceae; __Staphylococcus; __Staphylococcus warneri	Bacteria	__Firmicutes	__Bacilli	__Bacillales	__Staphylococcaceae	__Staphylococcus	__Staphylococcus warneri	1	1	NR_025922.1	NA	NA	22	9	5	4	9	3	0	1	8	0	0	0	0	0	1010
denovo111	Bacteria; __Nitrospinae; __Nitrospinia; __Nitrospinales; __Nitrospinaceae; __Nitrospina; __Nitrospina gracilis	Bacteria	__Nitrospinae	__Nitrospinia	__Nitrospinales	__Nitrospinaceae	__Nitrospina	__Nitrospina gracilis	1	1	NR_104821.1	NA	NA	0	158	235	0	24	179	0	1	123	0	0	0	0	104	0
denovo112	Bacteria; __Proteobacteria; __Gammaproteobacteria; __Alteromonadales; __Pseudoalteromonadaceae; __Pseudoalteromonas; __Pseudoalteromonas piratica	Bacteria	__Proteobacteria	__Gammaproteobacteria	__Alteromonadales	__Pseudoalteromonadaceae	__Pseudoalteromonas	__Pseudoalteromonas piratica	1	1	NR_157758.1	NA	NA	0	10	16	1	11	10	0	9	6	137	74	106	73	14	0
denovo113	Bacteria; __Bacteroidetes; __Flavobacteriia; __Flavobacteriales; __Flavobacteriaceae; __Pseudofulvibacter; __Pseudofulvibacter gastropodicola	Bacteria	__Bacteroidetes	__Flavobacteriia	__Flavobacteriales	__Flavobacteriaceae	__Pseudofulvibacter	__Pseudofulvibacter gastropodicola	1	1	NR_147772.1	NA	NA	2	0	8	0	0	3	0	0	3	89	471	20	182	163	0
denovo114	Bacteria; __Actinobacteria; __Actinobacteria; __Propionibacteriales; __Propionibacteriaceae; __Cutibacterium; __Cutibacterium acnes	Bacteria	__Actinobacteria	__Actinobacteria	__Propionibacteriales	__Propionibacteriaceae	__Cutibacterium	__Cutibacterium acnes	1	1	NR_040847.1	NA	NA	1	0	5	2	0	3	2	0	2	0	0	0	0	0	906
denovo115	Bacteria; __Proteobacteria; __Gammaproteobacteria; __Pseudomonadales; __Moraxellaceae; __Acinetobacter; __Acinetobacter pittii	Bacteria	__Proteobacteria	__Gammaproteobacteria	__Pseudomonadales	__Moraxellaceae	__Acinetobacter	__Acinetobacter pittii	1	1	NR_117621.1	NA	NA	7	11	18	17	5	62	8	23	154	16	6	15	46	4	289
denovo116	Bacteria; __Proteobacteria; __Gammaproteobacteria; __Chromatiales; __Granulosicoccaceae; __Granulosicoccus; __Granulosicoccus undariae	Bacteria	__Proteobacteria	__Gammaproteobacteria	__Chromatiales	__Granulosicoccaceae	__Granulosicoccus	__Granulosicoccus undariae	1	1	NR_134740.1	NA	NA	0	226	131	2	88	151	0	14	79	86	126	181	139	275	0
denovo117	Bacteria; __Proteobacteria; __Gammaproteobacteria; __Alteromonadales; __Pseudoalteromonadaceae; __Pseudoalteromonas; __Pseudoalteromonas haloplanktis	Bacteria	__Proteobacteria	__Gammaproteobacteria	__Alteromonadales	__Pseudoalteromonadaceae	__Pseudoalteromonas	__Pseudoalteromonas haloplanktis	1	1	NR_044837.2	NA	NA	139	91	358	70	28	193	50	7	120	29	15	94	58	115	107
denovo118	Bacteria; __Cyanobacteria; __; __Pleurocapsales; __Xenococcaceae; __Foliisarcina; __Foliisarcina bertiogensis	Bacteria	__Cyanobacteria	__	__Pleurocapsales	__Xenococcaceae	__Foliisarcina	__Foliisarcina bertiogensis	1	1	NR_148664.1	NA	NA	1	0	3	0	0	2	0	0	0	369	148	0	17	25	0
denovo119	Bacteria; __Proteobacteria; __Gammaproteobacteria; __; __; __Pseudohongiella; __Pseudohongiella spirulinae	Bacteria	__Proteobacteria	__Gammaproteobacteria	__	__	__Pseudohongiella	__Pseudohongiella spirulinae	1	1	NR_126265.1	NA	NA	0	17	7	2	1	10	2	6	7	180	103	57	162	44	0
denovo120	Bacteria; __Proteobacteria; __Alphaproteobacteria; __Rhodospirillales; __Rhodospirillaceae; __Marinibaculum; __Marinibaculum pumilum	Bacteria	__Proteobacteria	__Alphaproteobacteria	__Rhodospirillales	__Rhodospirillaceae	__Marinibaculum	__Marinibaculum pumilum	1	1	NR_152720.1	NA	NA	0	214	73	0	80	86	0	5	74	34	45	76	51	112	0
denovo121	Bacteria; __Cyanobacteria; __; __Nostocales; __Calotrichaceae; __Dulcicalothrix; __Dulcicalothrix necridiiformans	Bacteria	__Cyanobacteria	__	__Nostocales	__Calotrichaceae	__Dulcicalothrix	__Dulcicalothrix necridiiformans	1	1	NR_164867.1	NA	NA	95	1	1	34	0	4	139	0	0	108	64	43	19	5	0
denovo122	Bacteria; __Bacteroidetes; __Flavobacteriia; __Flavobacteriales; __Cryomorphaceae; __Vicingus; __Vicingus serpentipes	Bacteria	__Bacteroidetes	__Flavobacteriia	__Flavobacteriales	__Cryomorphaceae	__Vicingus	__Vicingus serpentipes	1	1	NR_159281.1	NA	NA	15	11	24	58	16	27	66	242	44	38	28	8	53	2	0
denovo123	; __; __; __; __; __; __		__	__	__	__	__	__	1	1	NA	NA	NA	0	10	1	0	3	1	0	0	1	53	69	61	49	135	0
denovo124	Bacteria; __Proteobacteria; __Gammaproteobacteria; __; __; __Pseudohongiella; __Pseudohongiella nitratireducens	Bacteria	__Proteobacteria	__Gammaproteobacteria	__	__	__Pseudohongiella	__Pseudohongiella nitratireducens	1	1	NR_153732.1	NA	NA	0	0	0	0	0	0	0	0	0	0	1	18	49	398	0
denovo125	Bacteria; __Proteobacteria; __Gammaproteobacteria; __Alteromonadales; __Colwelliaceae; __Colwellia; __Colwellia beringensis	Bacteria	__Proteobacteria	__Gammaproteobacteria	__Alteromonadales	__Colwelliaceae	__Colwellia	__Colwellia beringensis	1	1	NR_159245.1	NA	NA	8	29	195	5	3	174	1	0	74	0	0	3	3	52	2
denovo126	; __; __; __; __; __; __		__	__	__	__	__	__	1	1	NA	NA	NA	50	2	3	105	27	1	115	50	4	67	55	6	18	5	0
denovo127	Bacteria; __Proteobacteria; __Gammaproteobacteria; __; __; __Pseudohongiella; __Pseudohongiella nitratireducens	Bacteria	__Proteobacteria	__Gammaproteobacteria	__	__	__Pseudohongiella	__Pseudohongiella nitratireducens	1	1	NR_153732.1	NA	NA	0	212	69	0	15	54	0	2	36	0	3	2	2	29	0
denovo128	Bacteria; __Verrucomicrobia; __Verrucomicrobiae; __Verrucomicrobiales; __Verrucomicrobiaceae; __Fucophilus; __Fucophilus fucoidanolyticus	Bacteria	__Verrucomicrobia	__Verrucomicrobiae	__Verrucomicrobiales	__Verrucomicrobiaceae	__Fucophilus	__Fucophilus fucoidanolyticus	1	1	NR_112167.1	NA	NA	1	13	116	0	10	54	0	0	355	9	5	0	7	0	0
denovo129	Bacteria; __Bacteroidetes; __Flavobacteriia; __Flavobacteriales; __Cryomorphaceae; __Phaeocystidibacter; __Phaeocystidibacter marisrubri	Bacteria	__Bacteroidetes	__Flavobacteriia	__Flavobacteriales	__Cryomorphaceae	__Phaeocystidibacter	__Phaeocystidibacter marisrubri	1	1	NR_136475.1	NA	NA	0	0	0	0	2	0	0	0	0	100	44	93	73	31	0
denovo130	Bacteria; __Cyanobacteria; __; __Pleurocapsales; __Xenococcaceae; __Foliisarcina; __Foliisarcina bertiogensis	Bacteria	__Cyanobacteria	__	__Pleurocapsales	__Xenococcaceae	__Foliisarcina	__Foliisarcina bertiogensis	1	1	NR_148664.1	NA	NA	132	0	2	160	59	6	88	18	4	890	493	232	172	49	3
denovo131	Bacteria; __Bacteroidetes; __Flavobacteriia; __Flavobacteriales; __Cryomorphaceae; __Vicingus; __Vicingus serpentipes	Bacteria	__Bacteroidetes	__Flavobacteriia	__Flavobacteriales	__Cryomorphaceae	__Vicingus	__Vicingus serpentipes	1	1	NR_159281.1	NA	NA	0	136	70	4	22	74	2	93	96	17	7	4	22	4	0
denovo132	Bacteria; __Proteobacteria; __Alphaproteobacteria; __Rhizobiales; __Xanthobacteraceae; __Ancylobacter; __Ancylobacter polymorphus	Bacteria	__Proteobacteria	__Alphaproteobacteria	__Rhizobiales	__Xanthobacteraceae	__Ancylobacter	__Ancylobacter polymorphus	1	1	NR_042795.1	NA	NA	0	3	3	0	0	1	0	0	2	1	0	0	0	0	440
denovo133	Bacteria; __Actinobacteria; __Acidimicrobiia; __Acidimicrobiales; __Iamiaceae; __Aquihabitans; __Aquihabitans daechungensis	Bacteria	__Actinobacteria	__Acidimicrobiia	__Acidimicrobiales	__Iamiaceae	__Aquihabitans	__Aquihabitans daechungensis	1	1	NR_132289.1	NA	NA	0	105	98	3	204	106	1	50	151	13	33	1	43	38	0
denovo134	Bacteria; __Proteobacteria; __Alphaproteobacteria; __Caulobacterales; __Caulobacteraceae; __Asticcacaulis; __Asticcacaulis excentricus	Bacteria	__Proteobacteria	__Alphaproteobacteria	__Caulobacterales	__Caulobacteraceae	__Asticcacaulis	__Asticcacaulis excentricus	1	1	NR_074137.1	NA	NA	0	0	0	0	0	0	0	0	0	0	0	0	0	0	561
denovo135	Bacteria; __Proteobacteria; __Gammaproteobacteria; __Oceanospirillales; __Oceanospirillaceae; __Litoribrevibacter; __Litoribrevibacter euphylliae	Bacteria	__Proteobacteria	__Gammaproteobacteria	__Oceanospirillales	__Oceanospirillaceae	__Litoribrevibacter	__Litoribrevibacter euphylliae	1	1	NR_159321.1	NA	NA	0	13	15	0	6	28	0	0	26	3	56	4	25	207	0
denovo136	Bacteria; __Proteobacteria; __Alphaproteobacteria; __Kiloniellales; __Kiloniellaceae; __Kiloniella; __Kiloniella majae	Bacteria	__Proteobacteria	__Alphaproteobacteria	__Kiloniellales	__Kiloniellaceae	__Kiloniella	__Kiloniella majae	1	1	NR_152635.1	NA	NA	10	107	12	7	44	28	17	4	15	128	48	46	11	35	0
denovo137	; __; __; __; __; __; __		__	__	__	__	__	__	1	1	NA	NA	NA	0	0	1	0	0	0	0	0	0	124	161	44	98	3	0
denovo138	Bacteria; __Nitrospinae; __Nitrospinia; __Nitrospinales; __Nitrospinaceae; __Nitrospina; __Nitrospina gracilis	Bacteria	__Nitrospinae	__Nitrospinia	__Nitrospinales	__Nitrospinaceae	__Nitrospina	__Nitrospina gracilis	1	1	NR_104821.1	NA	NA	0	9	77	0	3	59	0	2	41	0	2	1	11	222	2
denovo139	; __; __; __; __; __; __		__	__	__	__	__	__	1	1	NA	NA	NA	0	251	53	0	12	45	0	0	18	1	1	2	7	37	0
denovo140	Bacteria; __Proteobacteria; __Betaproteobacteria; __Nitrosomonadales; __Nitrosomonadaceae; __Nitrosospira; __Nitrosospira multiformis	Bacteria	__Proteobacteria	__Betaproteobacteria	__Nitrosomonadales	__Nitrosomonadaceae	__Nitrosospira	__Nitrosospira multiformis	1	1	NR_074736.1	NA	NA	0	163	73	1	16	76	0	0	56	0	0	0	0	42	0
denovo141	Bacteria; __Firmicutes; __Bacilli; __Lactobacillales; __Streptococcaceae; __Streptococcus; __Streptococcus periodonticum	Bacteria	__Firmicutes	__Bacilli	__Lactobacillales	__Streptococcaceae	__Streptococcus	__Streptococcus periodonticum	1	1	NR_165747.1	NA	NA	1	6	2	0	4	4	0	0	0	0	0	0	0	0	544
denovo142	Bacteria; __Proteobacteria; __Gammaproteobacteria; __Pseudomonadales; __Pseudomonadaceae; __Pseudomonas; __Pseudomonas knackmussii	Bacteria	__Proteobacteria	__Gammaproteobacteria	__Pseudomonadales	__Pseudomonadaceae	__Pseudomonas	__Pseudomonas knackmussii	1	1	NR_117756.1	NA	NA	361	127	67	4	2	8	5	0	4	0	0	0	0	0	0
denovo143	Bacteria; __Bacteroidetes; __Saprospiria; __Saprospirales; __Lewinellaceae; __Lewinella; __Lewinella xylanilytica	Bacteria	__Bacteroidetes	__Saprospiria	__Saprospirales	__Lewinellaceae	__Lewinella	__Lewinella xylanilytica	1	1	NR_137393.1	NA	NA	26	3	8	124	33	0	61	107	11	0	0	0	0	0	0
denovo144	Bacteria; __Proteobacteria; __Alphaproteobacteria; __Rhodobacterales; __Rhodobacteraceae; __Frigidibacter; __Frigidibacter albus	Bacteria	__Proteobacteria	__Alphaproteobacteria	__Rhodobacterales	__Rhodobacteraceae	__Frigidibacter	__Frigidibacter albus	1	1	NR_134731.1	NA	NA	0	3	0	0	0	1	0	0	1	0	0	0	0	0	386
denovo145	Bacteria; __Proteobacteria; __Alphaproteobacteria; __Rhodobacterales; __Rhodobacteraceae; __Rhodovulum; __Rhodovulum mangrovi	Bacteria	__Proteobacteria	__Alphaproteobacteria	__Rhodobacterales	__Rhodobacteraceae	__Rhodovulum	__Rhodovulum mangrovi	1	1	NR_134157.1	NA	NA	0	15	3	0	3	8	0	0	6	44	61	93	28	63	0
denovo146	Bacteria; __Acidobacteria; __Acidobacteriia; __Bryobacterales; __Bryobacteraceae; __Paludibaculum; __Paludibaculum fermentans	Bacteria	__Acidobacteria	__Acidobacteriia	__Bryobacterales	__Bryobacteraceae	__Paludibaculum	__Paludibaculum fermentans	1	1	NR_134120.1	NA	NA	0	0	0	0	0	0	0	0	0	0	0	0	0	0	484
denovo147	Bacteria; __Proteobacteria; __Betaproteobacteria; __Nitrosomonadales; __Methylophilaceae; __Methylophilus; __Methylophilus methylotrophus	Bacteria	__Proteobacteria	__Betaproteobacteria	__Nitrosomonadales	__Methylophilaceae	__Methylophilus	__Methylophilus methylotrophus	1	1	NR_041257.1	NA	NA	0	211	76	0	78	79	1	22	57	92	44	58	35	104	0
denovo148	; __; __; __; __; __; __		__	__	__	__	__	__	1	1	NA	NA	NA	0	151	50	0	10	63	0	0	61	0	0	0	0	7	0
denovo149	Bacteria; __Cyanobacteria; __; __Pleurocapsales; __Xenococcaceae; __Foliisarcina; __Foliisarcina bertiogensis	Bacteria	__Cyanobacteria	__	__Pleurocapsales	__Xenococcaceae	__Foliisarcina	__Foliisarcina bertiogensis	1	1	NR_148664.1	NA	NA	0	0	10	0	0	2	0	0	0	143	180	90	60	47	0
denovo150	; __; __; __; __; __; __		__	__	__	__	__	__	1	1	NA	NA	NA	0	1	2	0	0	0	0	0	0	0	2	21	48	171	0
denovo151	Bacteria; __Verrucomicrobia; __Verrucomicrobiae; __Verrucomicrobiales; __Rubritaleaceae; __Rubritalea; __Rubritalea halochordaticola	Bacteria	__Verrucomicrobia	__Verrucomicrobiae	__Verrucomicrobiales	__Rubritaleaceae	__Rubritalea	__Rubritalea halochordaticola	1	1	NR_113049.1	NA	NA	0	0	18	0	5	81	0	0	108	0	0	0	0	0	0
denovo152	Bacteria; __Proteobacteria; __Alphaproteobacteria; __Rhodobacterales; __Rhodobacteraceae; __Gemmobacter; __Gemmobacter straminiformis	Bacteria	__Proteobacteria	__Alphaproteobacteria	__Rhodobacterales	__Rhodobacteraceae	__Gemmobacter	__Gemmobacter straminiformis	1	1	NR_159237.1	NA	NA	0	0	0	0	0	0	0	0	0	0	0	0	0	0	214
denovo153	Bacteria; __Proteobacteria; __Betaproteobacteria; __Burkholderiales; __Burkholderiaceae; __Ralstonia; __Ralstonia mannitolilytica	Bacteria	__Proteobacteria	__Betaproteobacteria	__Burkholderiales	__Burkholderiaceae	__Ralstonia	__Ralstonia mannitolilytica	1	1	NR_025385.1	NA	NA	8	15	5	1	0	4	42	2	7	0	0	0	0	0	296
denovo154	; __; __; __; __; __; __		__	__	__	__	__	__	1	1	NA	NA	NA	0	14	2	0	4	2	0	0	0	3	9	21	37	24	0
denovo155	Bacteria; __Proteobacteria; __Gammaproteobacteria; __Oceanospirillales; __Saccharospirillaceae; __Reinekea; __Reinekea marina	Bacteria	__Proteobacteria	__Gammaproteobacteria	__Oceanospirillales	__Saccharospirillaceae	__Reinekea	__Reinekea marina	1	1	NR_147763.1	NA	NA	12	26	21	39	31	22	25	26	23	3	10	0	13	28	0
denovo156	Bacteria; __Proteobacteria; __Gammaproteobacteria; __Arenicellales; __Arenicellaceae; __Arenicella; __Arenicella xantha	Bacteria	__Proteobacteria	__Gammaproteobacteria	__Arenicellales	__Arenicellaceae	__Arenicella	__Arenicella xantha	1	1	NR_112914.1	NA	NA	36	1	8	113	3	2	34	4	4	0	0	0	0	0	0
denovo157	Bacteria; __Proteobacteria; __Alphaproteobacteria; __Rhodospirillales; __; __Reyranella; __Reyranella aquatilis	Bacteria	__Proteobacteria	__Alphaproteobacteria	__Rhodospirillales	__	__Reyranella	__Reyranella aquatilis	1	1	NR_158037.1	NA	NA	0	1	0	0	0	0	0	0	0	0	0	0	0	0	354
denovo158	; __; __; __; __; __; __		__	__	__	__	__	__	1	1	NA	NA	NA	0	40	17	0	29	12	0	4	8	0	0	0	0	4	0
denovo159	; __; __; __; __; __; __		__	__	__	__	__	__	1	1	NA	NA	NA	7	64	10	18	182	3	8	18	24	234	104	54	48	19	0
denovo160	Bacteria; __Bacteroidetes; __Flavobacteriia; __Flavobacteriales; __Cryomorphaceae; __Owenweeksia; __Owenweeksia hongkongensis	Bacteria	__Bacteroidetes	__Flavobacteriia	__Flavobacteriales	__Cryomorphaceae	__Owenweeksia	__Owenweeksia hongkongensis	1	1	NR_074100.1	NA	NA	0	10	19	0	36	18	1	74	9	69	60	51	160	24	0
denovo161	Bacteria; __Cyanobacteria; __; __Synechococcales; __Acaryochloridaceae; __Acaryochloris; __Acaryochloris marina	Bacteria	__Cyanobacteria	__	__Synechococcales	__Acaryochloridaceae	__Acaryochloris	__Acaryochloris marina	1	1	NR_074407.1	NA	NA	46	1	3	39	15	7	15	8	0	74	37	7	9	1	0
denovo162	; __; __; __; __; __; __		__	__	__	__	__	__	1	1	NA	NA	NA	0	109	95	0	3	109	0	0	62	0	0	0	0	7	0
denovo163	Bacteria; __Proteobacteria; __Gammaproteobacteria; __Chromatiales; __; __Thiohalobacter; __Thiohalobacter thiocyanaticus	Bacteria	__Proteobacteria	__Gammaproteobacteria	__Chromatiales	__	__Thiohalobacter	__Thiohalobacter thiocyanaticus	1	1	NR_116699.1	NA	NA	1	228	65	1	47	77	2	9	73	53	48	65	28	36	0
denovo164	Bacteria; __Proteobacteria; __Gammaproteobacteria; __Alteromonadales; __Shewanellaceae; __Shewanella; __Shewanella hafniensis	Bacteria	__Proteobacteria	__Gammaproteobacteria	__Alteromonadales	__Shewanellaceae	__Shewanella	__Shewanella hafniensis	1	1	NR_041296.1	NA	NA	0	63	29	2	81	13	0	17	14	25	31	10	33	21	0
denovo165	Bacteria; __Proteobacteria; __Gammaproteobacteria; __Chromatiales; __Thioprofundaceae; __Thioprofundum; __Thioprofundum lithotrophicum	Bacteria	__Proteobacteria	__Gammaproteobacteria	__Chromatiales	__Thioprofundaceae	__Thioprofundum	__Thioprofundum lithotrophicum	1	1	NR_112829.1	NA	NA	0	16	112	0	17	98	0	4	95	0	0	0	3	20	0
denovo166	Bacteria; __Proteobacteria; __Alphaproteobacteria; __Rhodobacterales; __Rhodobacteraceae; __Leisingera; __Leisingera aquaemixtae	Bacteria	__Proteobacteria	__Alphaproteobacteria	__Rhodobacterales	__Rhodobacteraceae	__Leisingera	__Leisingera aquaemixtae	1	1	NR_126297.1	NA	NA	0	0	3	0	0	3	0	0	5	59	41	75	40	90	0
denovo167	Bacteria; __Proteobacteria; __Alphaproteobacteria; __Rhizobiales; __Hyphomicrobiaceae; __Aquabacter; __Aquabacter spiritensis	Bacteria	__Proteobacteria	__Alphaproteobacteria	__Rhizobiales	__Hyphomicrobiaceae	__Aquabacter	__Aquabacter spiritensis	1	1	NR_104747.1	NA	NA	0	9	0	0	0	1	1	0	2	0	0	0	0	0	277
denovo168	Bacteria; __Proteobacteria; __Alphaproteobacteria; __Rhizobiales; __Xanthobacteraceae; __Ancylobacter; __Ancylobacter oerskovii	Bacteria	__Proteobacteria	__Alphaproteobacteria	__Rhizobiales	__Xanthobacteraceae	__Ancylobacter	__Ancylobacter oerskovii	1	1	NR_042655.1	NA	NA	0	0	0	0	0	0	0	0	0	0	0	0	0	0	304
denovo169	Bacteria; __Proteobacteria; __Alphaproteobacteria; __Rhodobacterales; __Rhodobacteraceae; __Paracoccus; __Paracoccus hibiscisoli	Bacteria	__Proteobacteria	__Alphaproteobacteria	__Rhodobacterales	__Rhodobacteraceae	__Paracoccus	__Paracoccus hibiscisoli	1	1	NR_157668.1	NA	NA	10	4	3	2	0	0	0	0	0	0	0	0	0	0	298
denovo170	Bacteria; __Actinobacteria; __Acidimicrobiia; __Acidimicrobiales; __Ilumatobacteraceae; __Ilumatobacter; __Ilumatobacter fluminis	Bacteria	__Actinobacteria	__Acidimicrobiia	__Acidimicrobiales	__Ilumatobacteraceae	__Ilumatobacter	__Ilumatobacter fluminis	1	1	NR_041633.1	NA	NA	2	3	13	5	11	9	7	14	9	39	50	1	66	14	0
denovo171	Bacteria; __Bacteroidetes; __Cytophagia; __Cytophagales; __Flammeovirgaceae; __Imperialibacter; __Imperialibacter roseus	Bacteria	__Bacteroidetes	__Cytophagia	__Cytophagales	__Flammeovirgaceae	__Imperialibacter	__Imperialibacter roseus	1	1	NR_132295.1	NA	NA	0	2	35	0	0	40	0	3	27	26	124	35	116	43	0
denovo172	Bacteria; __Bacteroidetes; __Flavobacteriia; __Flavobacteriales; __Cryomorphaceae; __Vicingus; __Vicingus serpentipes	Bacteria	__Bacteroidetes	__Flavobacteriia	__Flavobacteriales	__Cryomorphaceae	__Vicingus	__Vicingus serpentipes	1	1	NR_159281.1	NA	NA	0	47	135	0	90	92	0	6	102	0	9	1	59	62	0
denovo173	Bacteria; __Proteobacteria; __Alphaproteobacteria; __Emcibacterales; __Emcibacteraceae; __Emcibacter; __Emcibacter nanhaiensis	Bacteria	__Proteobacteria	__Alphaproteobacteria	__Emcibacterales	__Emcibacteraceae	__Emcibacter	__Emcibacter nanhaiensis	1	1	NR_136430.1	NA	NA	0	5	9	0	9	11	0	8	8	57	51	36	48	32	0
denovo174	Bacteria; __Firmicutes; __Bacilli; __Lactobacillales; __Streptococcaceae; __Streptococcus; __Streptococcus salivarius	Bacteria	__Firmicutes	__Bacilli	__Lactobacillales	__Streptococcaceae	__Streptococcus	__Streptococcus salivarius	1	1	NR_042776.1	NA	NA	0	0	0	0	0	0	0	0	3	0	0	0	0	0	532
denovo175	Bacteria; __Proteobacteria; __Alphaproteobacteria; __Rickettsiales; __Rickettsiaceae; __Rickettsia; __Rickettsia sibirica	Bacteria	__Proteobacteria	__Alphaproteobacteria	__Rickettsiales	__Rickettsiaceae	__Rickettsia	__Rickettsia sibirica	1	1	NR_036848.1	NA	NA	0	0	0	0	0	0	0	0	0	237	1	0	0	0	7
denovo176	Bacteria; __Firmicutes; __Bacilli; __Lactobacillales; __Lactobacillaceae; __Lactobacillus; __Lactobacillus fermentum	Bacteria	__Firmicutes	__Bacilli	__Lactobacillales	__Lactobacillaceae	__Lactobacillus	__Lactobacillus fermentum	1	1	NR_104927.1	NA	NA	0	0	0	0	0	0	0	0	0	0	0	0	0	0	186
denovo177	Bacteria; __Proteobacteria; __Alphaproteobacteria; __Rhodospirillales; __Rhodospirillaceae; __Oceanibaculum; __Oceanibaculum pacificum	Bacteria	__Proteobacteria	__Alphaproteobacteria	__Rhodospirillales	__Rhodospirillaceae	__Oceanibaculum	__Oceanibaculum pacificum	1	1	NR_116679.1	NA	NA	1	39	48	0	18	32	2	3	41	17	21	15	22	62	0
denovo178	Bacteria; __Proteobacteria; __Betaproteobacteria; __Burkholderiales; __Burkholderiaceae; __Polynucleobacter; __Polynucleobacter acidiphobus	Bacteria	__Proteobacteria	__Betaproteobacteria	__Burkholderiales	__Burkholderiaceae	__Polynucleobacter	__Polynucleobacter acidiphobus	1	1	NR_125545.1	NA	NA	0	4	1	0	0	1	0	0	0	0	0	0	0	0	341
denovo179	Bacteria; __Proteobacteria; __Alphaproteobacteria; __Sphingomonadales; __Sphingomonadaceae; __Novosphingobium; __Novosphingobium lotistagni	Bacteria	__Proteobacteria	__Alphaproteobacteria	__Sphingomonadales	__Sphingomonadaceae	__Novosphingobium	__Novosphingobium lotistagni	1	1	NR_152714.1	NA	NA	0	1	2	0	0	0	0	0	0	0	0	0	0	0	311
denovo180	Bacteria; __Planctomycetes; __Phycisphaerae; __Phycisphaerales; __Phycisphaeraceae; __Algisphaera; __Algisphaera agarilytica	Bacteria	__Planctomycetes	__Phycisphaerae	__Phycisphaerales	__Phycisphaeraceae	__Algisphaera	__Algisphaera agarilytica	1	1	NR_125472.1	NA	NA	0	0	0	0	0	0	0	0	0	24	53	5	63	23	0
denovo181	Bacteria; __Proteobacteria; __Alphaproteobacteria; __Sphingomonadales; __Sphingomonadaceae; __Novosphingobium; __Novosphingobium acidiphilum	Bacteria	__Proteobacteria	__Alphaproteobacteria	__Sphingomonadales	__Sphingomonadaceae	__Novosphingobium	__Novosphingobium acidiphilum	1	1	NR_116278.1	NA	NA	0	0	0	0	0	0	0	0	0	29	21	53	5	138	0
denovo182	Bacteria; __Bacteroidetes; __Cytophagia; __Cytophagales; __Flammeovirgaceae; __Algivirga; __Algivirga pacifica	Bacteria	__Bacteroidetes	__Cytophagia	__Cytophagales	__Flammeovirgaceae	__Algivirga	__Algivirga pacifica	1	1	NR_118385.1	NA	NA	0	0	0	0	0	2	0	0	0	12	68	24	69	22	0
denovo183	Bacteria; __Cyanobacteria; __; __Nostocales; __Calotrichaceae; __Dulcicalothrix; __Dulcicalothrix necridiiformans	Bacteria	__Cyanobacteria	__	__Nostocales	__Calotrichaceae	__Dulcicalothrix	__Dulcicalothrix necridiiformans	1	1	NR_164867.1	NA	NA	38	0	5	66	9	6	85	66	2	0	0	0	0	0	0
denovo184	Bacteria; __Proteobacteria; __Gammaproteobacteria; __Chromatiales; __Granulosicoccaceae; __Granulosicoccus; __Granulosicoccus coccoides	Bacteria	__Proteobacteria	__Gammaproteobacteria	__Chromatiales	__Granulosicoccaceae	__Granulosicoccus	__Granulosicoccus coccoides	1	1	NR_104509.1	NA	NA	0	17	46	0	0	34	0	0	28	0	0	0	2	42	0
denovo185	Bacteria; __Bacteroidetes; __Cytophagia; __Cytophagales; __Cytophagaceae; __Marinoscillum; __Marinoscillum pacificum	Bacteria	__Bacteroidetes	__Cytophagia	__Cytophagales	__Cytophagaceae	__Marinoscillum	__Marinoscillum pacificum	1	1	NR_043917.1	NA	NA	7	53	17	1	11	17	5	13	13	40	22	11	15	5	0
denovo186	Bacteria; __Firmicutes; __Bacilli; __Lactobacillales; __Carnobacteriaceae; __Carnobacterium; __Carnobacterium alterfunditum	Bacteria	__Firmicutes	__Bacilli	__Lactobacillales	__Carnobacteriaceae	__Carnobacterium	__Carnobacterium alterfunditum	1	1	NR_104715.1	NA	NA	0	0	0	0	0	1	0	0	3	0	0	1	0	0	348
denovo187	; __; __; __; __; __; __		__	__	__	__	__	__	1	1	NA	NA	NA	0	0	0	0	0	0	0	0	0	98	57	118	16	4	0
denovo188	Bacteria; __Proteobacteria; __Gammaproteobacteria; __; __; __Pseudohongiella; __Pseudohongiella spirulinae	Bacteria	__Proteobacteria	__Gammaproteobacteria	__	__	__Pseudohongiella	__Pseudohongiella spirulinae	1	1	NR_126265.1	NA	NA	0	172	129	0	4	89	0	0	50	0	0	1	3	41	0
denovo189	Bacteria; __Verrucomicrobia; __Opitutae; __Puniceicoccales; __Puniceicoccaceae; __Ruficoccus; __Ruficoccus amylovorans	Bacteria	__Verrucomicrobia	__Opitutae	__Puniceicoccales	__Puniceicoccaceae	__Ruficoccus	__Ruficoccus amylovorans	1	1	NR_156844.1	NA	NA	0	12	34	0	17	49	2	6	23	67	76	111	102	12	0
denovo190	Bacteria; __Bacteroidetes; __Flavobacteriia; __Flavobacteriales; __Cryomorphaceae; __Vicingus; __Vicingus serpentipes	Bacteria	__Bacteroidetes	__Flavobacteriia	__Flavobacteriales	__Cryomorphaceae	__Vicingus	__Vicingus serpentipes	1	1	NR_159281.1	NA	NA	0	0	5	0	0	5	0	0	3	57	52	25	81	34	0
denovo191	Bacteria; __Bacteroidetes; __Flavobacteriia; __Flavobacteriales; __Crocinitomicaceae; __Salinirepens; __Salinirepens amamiensis	Bacteria	__Bacteroidetes	__Flavobacteriia	__Flavobacteriales	__Crocinitomicaceae	__Salinirepens	__Salinirepens amamiensis	1	1	NR_112980.1	NA	NA	0	0	0	0	0	0	0	0	1	20	53	22	108	48	0
denovo192	Bacteria; __Bacteroidetes; __Cytophagia; __Cytophagales; __Hymenobacteraceae; __Pontibacter; __Pontibacter rugosus	Bacteria	__Bacteroidetes	__Cytophagia	__Cytophagales	__Hymenobacteraceae	__Pontibacter	__Pontibacter rugosus	1	1	NR_152663.1	NA	NA	125	12	27	0	0	3	1	0	0	0	0	0	0	0	0
denovo193	Bacteria; __Actinobacteria; __Actinobacteria; __Micrococcales; __Dermabacteraceae; __Brachybacterium; __Brachybacterium faecium	Bacteria	__Actinobacteria	__Actinobacteria	__Micrococcales	__Dermabacteraceae	__Brachybacterium	__Brachybacterium faecium	1	1	NR_074655.2	NA	NA	168	1	28	2	0	3	1	0	1	0	0	0	0	0	0
denovo194	Bacteria; __Actinobacteria; __Acidimicrobiia; __Acidimicrobiales; __Iamiaceae; __Aquihabitans; __Aquihabitans daechungensis	Bacteria	__Actinobacteria	__Acidimicrobiia	__Acidimicrobiales	__Iamiaceae	__Aquihabitans	__Aquihabitans daechungensis	1	1	NR_132289.1	NA	NA	0	112	0	1	23	0	0	88	0	0	44	0	10	2	0
denovo195	Bacteria; __Proteobacteria; __Deltaproteobacteria; __Myxococcales; __Polyangiaceae; __Racemicystis; __Racemicystis persica	Bacteria	__Proteobacteria	__Deltaproteobacteria	__Myxococcales	__Polyangiaceae	__Racemicystis	__Racemicystis persica	1	1	NR_156102.1	NA	NA	0	0	0	0	0	0	0	0	0	0	0	0	0	0	250
denovo196	Bacteria; __Proteobacteria; __Betaproteobacteria; __Burkholderiales; __Comamonadaceae; __Polaromonas; __Polaromonas aquatica	Bacteria	__Proteobacteria	__Betaproteobacteria	__Burkholderiales	__Comamonadaceae	__Polaromonas	__Polaromonas aquatica	1	1	NR_042404.1	NA	NA	18	12	12	51	1	1	54	3	21	0	1	0	0	0	0
denovo197	Bacteria; __Bacteroidetes; __Flavobacteriia; __Flavobacteriales; __Flavobacteriaceae; __Lutibacter; __Lutibacter flavus	Bacteria	__Bacteroidetes	__Flavobacteriia	__Flavobacteriales	__Flavobacteriaceae	__Lutibacter	__Lutibacter flavus	1	1	NR_108696.1	NA	NA	0	0	3	0	0	24	0	0	192	5	13	0	4	0	0
denovo198	Bacteria; __Bacteroidetes; __Flavobacteriia; __Flavobacteriales; __Crocinitomicaceae; __Lishizhenia; __Lishizhenia tianjinensis	Bacteria	__Bacteroidetes	__Flavobacteriia	__Flavobacteriales	__Crocinitomicaceae	__Lishizhenia	__Lishizhenia tianjinensis	1	1	NR_116229.1	NA	NA	0	0	3	0	2	3	2	0	2	81	70	68	148	29	0
denovo199	Bacteria; __Proteobacteria; __Gammaproteobacteria; __Chromatiales; __; __Thiohalobacter; __Thiohalobacter thiocyanaticus	Bacteria	__Proteobacteria	__Gammaproteobacteria	__Chromatiales	__	__Thiohalobacter	__Thiohalobacter thiocyanaticus	1	1	NR_116699.1	NA	NA	0	111	18	0	12	11	0	0	25	5	4	11	16	56	0
denovo200	Bacteria; __Proteobacteria; __Gammaproteobacteria; __Oceanospirillales; __Oceanospirillaceae; __Oleispira; __Oleispira lenta	Bacteria	__Proteobacteria	__Gammaproteobacteria	__Oceanospirillales	__Oceanospirillaceae	__Oleispira	__Oleispira lenta	1	1	NR_108293.1	NA	NA	22	42	194	0	0	34	0	0	44	0	0	0	2	14	0
denovo201	; __; __; __; __; __; __		__	__	__	__	__	__	1	1	NA	NA	NA	0	23	12	0	0	6	0	0	3	0	0	1	2	19	0
denovo202	Bacteria; __Proteobacteria; __Alphaproteobacteria; __Sphingomonadales; __Sphingomonadaceae; __Novosphingobium; __Novosphingobium fuchskuhlense	Bacteria	__Proteobacteria	__Alphaproteobacteria	__Sphingomonadales	__Sphingomonadaceae	__Novosphingobium	__Novosphingobium fuchskuhlense	1	1	NR_118270.1	NA	NA	0	127	29	0	14	26	0	0	18	2	5	14	8	133	0
denovo203	Bacteria; __Proteobacteria; __Alphaproteobacteria; __Rhodospirillales; __Rhodospirillaceae; __Nisaea; __Nisaea nitritireducens	Bacteria	__Proteobacteria	__Alphaproteobacteria	__Rhodospirillales	__Rhodospirillaceae	__Nisaea	__Nisaea nitritireducens	1	1	NR_043924.1	NA	NA	0	0	0	0	0	0	0	0	0	67	50	60	38	26	0
denovo204	; __; __; __; __; __; __		__	__	__	__	__	__	1	1	NA	NA	NA	0	0	0	0	0	0	0	0	0	98	74	40	14	7	0
denovo205	Bacteria; __Proteobacteria; __Gammaproteobacteria; __Pseudomonadales; __Moraxellaceae; __Moraxella; __Moraxella osloensis	Bacteria	__Proteobacteria	__Gammaproteobacteria	__Pseudomonadales	__Moraxellaceae	__Moraxella	__Moraxella osloensis	1	1	NR_113392.1	NA	NA	2	0	0	0	0	0	0	0	2	0	0	0	0	0	242
denovo206	Bacteria; __Firmicutes; __Bacilli; __Lactobacillales; __Streptococcaceae; __Lactococcus; __Lactococcus lactis	Bacteria	__Firmicutes	__Bacilli	__Lactobacillales	__Streptococcaceae	__Lactococcus	__Lactococcus lactis	1	1	NR_113925.1	NA	NA	0	0	0	0	0	0	0	0	0	0	0	0	0	0	220
denovo207	Bacteria; __Bacteroidetes; __Cytophagia; __Cytophagales; __Cytophagaceae; __Emticicia; __Emticicia aquatilis	Bacteria	__Bacteroidetes	__Cytophagia	__Cytophagales	__Cytophagaceae	__Emticicia	__Emticicia aquatilis	1	1	NR_156965.1	NA	NA	0	18	0	0	0	0	0	0	0	0	0	0	0	0	175
denovo208	Bacteria; __Proteobacteria; __Gammaproteobacteria; __Cellvibrionales; __Halieaceae; __Luminiphilus; __Luminiphilus syltensis	Bacteria	__Proteobacteria	__Gammaproteobacteria	__Cellvibrionales	__Halieaceae	__Luminiphilus	__Luminiphilus syltensis	1	1	NR_125526.1	NA	NA	0	0	0	0	0	0	0	0	0	48	45	29	22	32	0
denovo209	Bacteria; __Proteobacteria; __Betaproteobacteria; __Burkholderiales; __Comamonadaceae; __Acidovorax; __Acidovorax delafieldii	Bacteria	__Proteobacteria	__Betaproteobacteria	__Burkholderiales	__Comamonadaceae	__Acidovorax	__Acidovorax delafieldii	1	1	NR_028714.1	NA	NA	0	3	6	0	0	0	1	0	0	0	1	2	1	0	244
denovo210	; __; __; __; __; __; __		__	__	__	__	__	__	1	1	NA	NA	NA	0	47	18	0	60	41	0	14	52	0	2	0	0	1	0
denovo211	; __; __; __; __; __; __		__	__	__	__	__	__	1	1	NA	NA	NA	2	0	9	0	49	4	3	4	1	25	33	52	46	26	0
denovo212	Bacteria; __Bacteroidetes; __Cytophagia; __Cytophagales; __Flammeovirgaceae; __Fabibacter; __Fabibacter misakiensis	Bacteria	__Bacteroidetes	__Cytophagia	__Cytophagales	__Flammeovirgaceae	__Fabibacter	__Fabibacter misakiensis	1	1	NR_137379.1	NA	NA	0	77	37	0	2	13	0	0	17	0	2	0	4	92	0
denovo213	; __; __; __; __; __; __		__	__	__	__	__	__	1	1	NA	NA	NA	0	5	2	0	0	0	0	0	0	125	33	45	68	0	0
denovo214	Bacteria; __Proteobacteria; __Alphaproteobacteria; __Rhodospirillales; __Rhodospirillaceae; __Oceanibaculum; __Oceanibaculum nanhaiense	Bacteria	__Proteobacteria	__Alphaproteobacteria	__Rhodospirillales	__Rhodospirillaceae	__Oceanibaculum	__Oceanibaculum nanhaiense	1	1	NR_159190.1	NA	NA	0	14	75	0	7	42	0	3	49	2	1	4	22	66	0
denovo215	; __; __; __; __; __; __		__	__	__	__	__	__	1	1	NA	NA	NA	0	0	1	0	1	0	0	0	0	29	20	73	29	4	0
denovo216	Bacteria; __Proteobacteria; __Gammaproteobacteria; __Chromatiales; __Thioprofundaceae; __Thioprofundum; __Thioprofundum lithotrophicum	Bacteria	__Proteobacteria	__Gammaproteobacteria	__Chromatiales	__Thioprofundaceae	__Thioprofundum	__Thioprofundum lithotrophicum	1	1	NR_112829.1	NA	NA	0	116	50	0	1	19	0	0	12	0	0	6	13	207	0
denovo217	Bacteria; __Proteobacteria; __Gammaproteobacteria; __Pseudomonadales; __Moraxellaceae; __Psychrobacter; __Psychrobacter okhotskensis	Bacteria	__Proteobacteria	__Gammaproteobacteria	__Pseudomonadales	__Moraxellaceae	__Psychrobacter	__Psychrobacter okhotskensis	1	1	NR_024806.1	NA	NA	15	4	80	0	5	44	2	7	24	0	3	1	1	1	106
denovo218	Bacteria; __Planctomycetes; __Planctomycetia; __Pirellulales; __Pirellulaceae; __Mariniblastus; __Mariniblastus fucicola	Bacteria	__Planctomycetes	__Planctomycetia	__Pirellulales	__Pirellulaceae	__Mariniblastus	__Mariniblastus fucicola	1	1	NR_156914.1	NA	NA	0	0	18	0	9	25	0	0	21	1	0	1	1	15	0
denovo219	Bacteria; __Bacteroidetes; __Saprospiria; __Saprospirales; __Lewinellaceae; __Lewinella; __Lewinella nigricans	Bacteria	__Bacteroidetes	__Saprospiria	__Saprospirales	__Lewinellaceae	__Lewinella	__Lewinella nigricans	1	1	NR_115013.1	NA	NA	2	12	6	4	100	10	7	39	6	0	0	0	1	0	0
denovo220	Bacteria; __Bacteroidetes; __Flavobacteriia; __Flavobacteriales; __Flavobacteriaceae; __Croceibacter; __Croceibacter atlanticus	Bacteria	__Bacteroidetes	__Flavobacteriia	__Flavobacteriales	__Flavobacteriaceae	__Croceibacter	__Croceibacter atlanticus	1	1	NR_074636.1	NA	NA	32	8	4	57	5	9	79	6	0	40	5	37	6	0	0
denovo221	Bacteria; __Bacteroidetes; __Flavobacteriia; __Flavobacteriales; __Cryomorphaceae; __Vicingus; __Vicingus serpentipes	Bacteria	__Bacteroidetes	__Flavobacteriia	__Flavobacteriales	__Cryomorphaceae	__Vicingus	__Vicingus serpentipes	1	1	NR_159281.1	NA	NA	0	4	48	0	53	35	0	14	43	6	11	6	13	6	0
denovo222	Bacteria; __Bacteroidetes; __Flavobacteriia; __Flavobacteriales; __Cryomorphaceae; __Owenweeksia; __Owenweeksia hongkongensis	Bacteria	__Bacteroidetes	__Flavobacteriia	__Flavobacteriales	__Cryomorphaceae	__Owenweeksia	__Owenweeksia hongkongensis	1	1	NR_074100.1	NA	NA	7	49	5	69	27	3	22	0	3	0	0	0	0	0	0
denovo223	Bacteria; __Proteobacteria; __Gammaproteobacteria; __Oceanospirillales; __Endozoicomonadaceae; __Endozoicomonas; __Endozoicomonas ascidiicola	Bacteria	__Proteobacteria	__Gammaproteobacteria	__Oceanospirillales	__Endozoicomonadaceae	__Endozoicomonas	__Endozoicomonas ascidiicola	1	1	NR_146693.1	NA	NA	0	10	24	2	14	22	2	77	27	0	0	0	0	0	0
denovo224	Bacteria; __Proteobacteria; __Gammaproteobacteria; __Cellvibrionales; __Spongiibacteraceae; __Oceanicoccus; __Oceanicoccus sagamiensis	Bacteria	__Proteobacteria	__Gammaproteobacteria	__Cellvibrionales	__Spongiibacteraceae	__Oceanicoccus	__Oceanicoccus sagamiensis	1	1	NR_113054.1	NA	NA	0	0	6	0	0	7	0	6	3	14	2	6	96	1	0
denovo225	Bacteria; __Proteobacteria; __Alphaproteobacteria; __Rhodospirillales; __Rhodospirillaceae; __Magnetospira; __Magnetospira thiophila	Bacteria	__Proteobacteria	__Alphaproteobacteria	__Rhodospirillales	__Rhodospirillaceae	__Magnetospira	__Magnetospira thiophila	1	1	NR_116475.1	NA	NA	0	28	63	0	26	56	0	3	51	3	11	5	3	40	0
denovo226	Bacteria; __Proteobacteria; __Gammaproteobacteria; __Alteromonadales; __Colwelliaceae; __Colwellia; __Colwellia polaris	Bacteria	__Proteobacteria	__Gammaproteobacteria	__Alteromonadales	__Colwelliaceae	__Colwellia	__Colwellia polaris	1	1	NR_043462.1	NA	NA	9	8	69	1	2	123	12	1	22	0	0	3	31	9	0
denovo227	Bacteria; __Bacteroidetes; __Flavobacteriia; __Flavobacteriales; __Cryomorphaceae; __Vicingus; __Vicingus serpentipes	Bacteria	__Bacteroidetes	__Flavobacteriia	__Flavobacteriales	__Cryomorphaceae	__Vicingus	__Vicingus serpentipes	1	1	NR_159281.1	NA	NA	0	0	9	0	1	15	0	0	6	1	3	8	40	147	0
denovo228	; __; __; __; __; __; __		__	__	__	__	__	__	1	1	NA	NA	NA	0	21	50	0	8	60	0	1	34	0	0	0	6	45	0
denovo229	Bacteria; __Proteobacteria; __Alphaproteobacteria; __Pelagibacterales; __Pelagibacteraceae; __Candidatus Pelagibacter; __Candidatus Pelagibacter ubique	Bacteria	__Proteobacteria	__Alphaproteobacteria	__Pelagibacterales	__Pelagibacteraceae	__Candidatus Pelagibacter	__Candidatus Pelagibacter ubique	1	1	NR_074224.1	NA	NA	0	120	345	0	31	220	0	3	167	14	42	12	45	473	0
denovo230	; __; __; __; __; __; __		__	__	__	__	__	__	1	1	NA	NA	NA	0	55	42	0	3	31	0	0	10	0	0	0	7	69	0
denovo231	; __; __; __; __; __; __		__	__	__	__	__	__	1	1	NA	NA	NA	1	0	0	0	1	1	0	0	1	38	28	16	10	7	0
denovo232	Bacteria; __Proteobacteria; __Gammaproteobacteria; __Oceanospirillales; __Oceanospirillaceae; __Spongiispira; __Spongiispira norvegica	Bacteria	__Proteobacteria	__Gammaproteobacteria	__Oceanospirillales	__Oceanospirillaceae	__Spongiispira	__Spongiispira norvegica	1	1	NR_042453.1	NA	NA	2	6	16	2	38	17	5	49	16	0	0	0	0	2	0
denovo233	Bacteria; __Proteobacteria; __Gammaproteobacteria; __Cellvibrionales; __Halieaceae; __Halioglobus; __Halioglobus japonicus	Bacteria	__Proteobacteria	__Gammaproteobacteria	__Cellvibrionales	__Halieaceae	__Halioglobus	__Halioglobus japonicus	1	1	NR_113277.1	NA	NA	15	5	2	32	5	4	31	149	1	4	9	6	16	3	0
denovo234	Bacteria; __Bacteroidetes; __Flavobacteriia; __Flavobacteriales; __Cryomorphaceae; __Vicingus; __Vicingus serpentipes	Bacteria	__Bacteroidetes	__Flavobacteriia	__Flavobacteriales	__Cryomorphaceae	__Vicingus	__Vicingus serpentipes	1	1	NR_159281.1	NA	NA	1	0	30	0	0	61	0	0	78	0	0	0	0	2	0
denovo235	Bacteria; __Proteobacteria; __Gammaproteobacteria; __Alteromonadales; __Alteromonadaceae; __Glaciecola; __Glaciecola nitratireducens	Bacteria	__Proteobacteria	__Gammaproteobacteria	__Alteromonadales	__Alteromonadaceae	__Glaciecola	__Glaciecola nitratireducens	1	1	NR_074628.1	NA	NA	0	13	74	0	2	29	1	1	178	0	0	0	8	2	0
denovo236	Bacteria; __Proteobacteria; __Gammaproteobacteria; __Cellvibrionales; __Porticoccaceae; __Porticoccus; __Porticoccus hydrocarbonoclasticus	Bacteria	__Proteobacteria	__Gammaproteobacteria	__Cellvibrionales	__Porticoccaceae	__Porticoccus	__Porticoccus hydrocarbonoclasticus	1	1	NR_118247.1	NA	NA	2	7	27	3	44	19	2	22	19	3	1	2	1	0	0
denovo237	Bacteria; __Proteobacteria; __Gammaproteobacteria; __Cellvibrionales; __Cellvibrionaceae; __Eionea; __Eionea nigra	Bacteria	__Proteobacteria	__Gammaproteobacteria	__Cellvibrionales	__Cellvibrionaceae	__Eionea	__Eionea nigra	1	1	NR_115270.1	NA	NA	0	2	5	0	22	25	0	10	22	0	0	0	1	11	0
denovo238	Bacteria; __Proteobacteria; __Alphaproteobacteria; __Rhodobacterales; __Hyphomonadaceae; __Hyphomonas; __Hyphomonas chukchiensis	Bacteria	__Proteobacteria	__Alphaproteobacteria	__Rhodobacterales	__Hyphomonadaceae	__Hyphomonas	__Hyphomonas chukchiensis	1	1	NR_148268.1	NA	NA	18	3	4	9	1	2	50	1	0	8	1	20	3	3	0
denovo239	Bacteria; __Bacteroidetes; __Flavobacteriia; __Flavobacteriales; __Flavobacteriaceae; __Cellulophaga; __Cellulophaga tyrosinoxydans	Bacteria	__Bacteroidetes	__Flavobacteriia	__Flavobacteriales	__Flavobacteriaceae	__Cellulophaga	__Cellulophaga tyrosinoxydans	1	1	NR_044502.1	NA	NA	3	47	10	5	3	2	1	0	6	42	26	1	28	3	0
denovo240	; __; __; __; __; __; __		__	__	__	__	__	__	1	1	NA	NA	NA	0	14	12	0	0	6	0	0	10	0	0	0	1	21	0
denovo241	; __; __; __; __; __; __		__	__	__	__	__	__	1	1	NA	NA	NA	0	18	44	0	6	73	0	0	24	0	0	0	1	33	0
denovo242	Archaea; __Thaumarchaeota; __; __Nitrosopumilales; __Nitrosopumilaceae; __Nitrosopumilus; __Nitrosopumilus oxyclinae	Archaea	__Thaumarchaeota	__	__Nitrosopumilales	__Nitrosopumilaceae	__Nitrosopumilus	__Nitrosopumilus oxyclinae	1	1	NR_159207.1	NA	NA	0	29	19	0	7	10	0	0	6	0	0	0	1	3	0
denovo243	Bacteria; __Cyanobacteria; __; __Nostocales; __Scytonemataceae; __Brasilonema; __Brasilonema tolantongensis	Bacteria	__Cyanobacteria	__	__Nostocales	__Scytonemataceae	__Brasilonema	__Brasilonema tolantongensis	1	1	NR_118308.1	NA	NA	21	2	0	42	4	0	104	7	0	53	0	0	0	0	0
denovo244	Bacteria; __Proteobacteria; __Gammaproteobacteria; __Enterobacterales; __Erwiniaceae; __Erwinia; __Erwinia billingiae	Bacteria	__Proteobacteria	__Gammaproteobacteria	__Enterobacterales	__Erwiniaceae	__Erwinia	__Erwinia billingiae	1	1	NR_118431.1	NA	NA	0	1	0	0	0	0	0	0	0	0	0	0	251	0	0
denovo245	Bacteria; __Bacteroidetes; __Flavobacteriia; __Flavobacteriales; __Crocinitomicaceae; __Crocinitomix; __Crocinitomix algicola	Bacteria	__Bacteroidetes	__Flavobacteriia	__Flavobacteriales	__Crocinitomicaceae	__Crocinitomix	__Crocinitomix algicola	1	1	NR_158097.1	NA	NA	0	0	11	0	0	4	0	0	1	0	2	2	12	15	0
denovo246	Bacteria; __Proteobacteria; __Alphaproteobacteria; __Rhodobacterales; __Hyphomonadaceae; __Fretibacter; __Fretibacter rubidus	Bacteria	__Proteobacteria	__Alphaproteobacteria	__Rhodobacterales	__Hyphomonadaceae	__Fretibacter	__Fretibacter rubidus	1	1	NR_135726.1	NA	NA	0	0	1	0	0	0	0	0	1	27	38	8	88	5	0
denovo247	Bacteria; __Firmicutes; __Negativicutes; __Veillonellales; __Veillonellaceae; __Veillonella; __Veillonella caviae	Bacteria	__Firmicutes	__Negativicutes	__Veillonellales	__Veillonellaceae	__Veillonella	__Veillonella caviae	1	1	NR_025762.1	NA	NA	0	0	0	0	0	0	0	0	0	0	0	0	0	0	85
denovo248	; __; __; __; __; __; __		__	__	__	__	__	__	1	1	NA	NA	NA	0	87	72	0	5	47	0	0	16	0	0	1	3	66	0
denovo249	; __; __; __; __; __; __		__	__	__	__	__	__	1	1	NA	NA	NA	0	0	0	0	0	0	0	0	0	8	11	15	46	4	0
denovo250	Bacteria; __Proteobacteria; __Betaproteobacteria; __Burkholderiales; __Comamonadaceae; __Limnohabitans; __Limnohabitans planktonicus	Bacteria	__Proteobacteria	__Betaproteobacteria	__Burkholderiales	__Comamonadaceae	__Limnohabitans	__Limnohabitans planktonicus	1	1	NR_125541.1	NA	NA	0	0	0	0	0	0	0	0	0	0	0	0	0	0	216
denovo251	Bacteria; __Proteobacteria; __Gammaproteobacteria; __Chromatiales; __Thioprofundaceae; __Thioprofundum; __Thioprofundum hispidum	Bacteria	__Proteobacteria	__Gammaproteobacteria	__Chromatiales	__Thioprofundaceae	__Thioprofundum	__Thioprofundum hispidum	1	1	NR_112620.1	NA	NA	0	70	20	0	0	17	0	0	11	0	0	0	3	8	0
denovo252	Bacteria; __Cyanobacteria; __; __Oscillatoriales; __Oscillatoriaceae; __Aerosakkonema; __Aerosakkonema funiforme	Bacteria	__Cyanobacteria	__	__Oscillatoriales	__Oscillatoriaceae	__Aerosakkonema	__Aerosakkonema funiforme	1	1	NR_114306.1	NA	NA	2	0	0	1	0	0	0	0	0	0	0	0	0	0	228
denovo253	Bacteria; __Proteobacteria; __Gammaproteobacteria; __Alteromonadales; __Pseudoalteromonadaceae; __Pseudoalteromonas; __Pseudoalteromonas denitrificans	Bacteria	__Proteobacteria	__Gammaproteobacteria	__Alteromonadales	__Pseudoalteromonadaceae	__Pseudoalteromonas	__Pseudoalteromonas denitrificans	1	1	NR_044866.1	NA	NA	0	0	183	0	0	28	0	0	60	0	0	0	0	0	0
denovo254	; __; __; __; __; __; __		__	__	__	__	__	__	1	1	NA	NA	NA	0	14	31	0	3	30	0	0	5	0	0	0	2	52	0
denovo255	Bacteria; __Planctomycetes; __Planctomycetia; __Pirellulales; __Pirellulaceae; __Blastopirellula; __Blastopirellula marina	Bacteria	__Planctomycetes	__Planctomycetia	__Pirellulales	__Pirellulaceae	__Blastopirellula	__Blastopirellula marina	1	1	NR_117648.1	NA	NA	0	16	80	0	6	80	0	0	40	0	0	0	2	24	0
denovo256	; __; __; __; __; __; __		__	__	__	__	__	__	1	1	NA	NA	NA	0	40	28	1	1	15	0	0	6	0	0	0	1	43	0
denovo257	Bacteria; __Bacteroidetes; __Flavobacteriia; __Flavobacteriales; __Flavobacteriaceae; __Lacinutrix; __Lacinutrix mariniflava	Bacteria	__Bacteroidetes	__Flavobacteriia	__Flavobacteriales	__Flavobacteriaceae	__Lacinutrix	__Lacinutrix mariniflava	1	1	NR_043593.1	NA	NA	0	43	22	0	0	14	0	0	5	0	0	0	1	29	0
denovo258	Bacteria; __Proteobacteria; __Alphaproteobacteria; __Sneathiellales; __Sneathiellaceae; __Sneathiella; __Sneathiella chinensis	Bacteria	__Proteobacteria	__Alphaproteobacteria	__Sneathiellales	__Sneathiellaceae	__Sneathiella	__Sneathiella chinensis	1	1	NR_114245.1	NA	NA	0	0	0	0	0	0	0	0	0	23	23	19	21	23	0
denovo259	Bacteria; __Bacteroidetes; __Flavobacteriia; __Flavobacteriales; __Cryomorphaceae; __Vicingus; __Vicingus serpentipes	Bacteria	__Bacteroidetes	__Flavobacteriia	__Flavobacteriales	__Cryomorphaceae	__Vicingus	__Vicingus serpentipes	1	1	NR_159281.1	NA	NA	0	0	0	0	0	0	0	0	0	43	28	0	44	9	0
denovo260	Bacteria; __Proteobacteria; __Gammaproteobacteria; __Vibrionales; __Vibrionaceae; __Vibrio; __Vibrio cidicii	Bacteria	__Proteobacteria	__Gammaproteobacteria	__Vibrionales	__Vibrionaceae	__Vibrio	__Vibrio cidicii	1	1	NR_152085.1	NA	NA	0	0	1	0	0	0	0	0	0	10	31	24	52	94	0
denovo261	Bacteria; __Firmicutes; __Bacilli; __Lactobacillales; __Lactobacillaceae; __Lactobacillus; __Lactobacillus salivarius	Bacteria	__Firmicutes	__Bacilli	__Lactobacillales	__Lactobacillaceae	__Lactobacillus	__Lactobacillus salivarius	1	1	NR_028725.2	NA	NA	0	0	0	0	0	0	0	0	0	0	0	0	0	0	80
denovo262	Bacteria; __Proteobacteria; __Alphaproteobacteria; __Rhodospirillales; __Rhodospirillaceae; __Nisaea; __Nisaea denitrificans	Bacteria	__Proteobacteria	__Alphaproteobacteria	__Rhodospirillales	__Rhodospirillaceae	__Nisaea	__Nisaea denitrificans	1	1	NR_043923.1	NA	NA	0	0	0	0	0	0	0	0	0	126	51	35	22	23	0
denovo263	Bacteria; __Actinobacteria; __Actinobacteria; __Micrococcales; __Microbacteriaceae; __Chryseoglobus; __Chryseoglobus frigidaquae	Bacteria	__Actinobacteria	__Actinobacteria	__Micrococcales	__Microbacteriaceae	__Chryseoglobus	__Chryseoglobus frigidaquae	1	1	NR_115999.1	NA	NA	5	3	3	7	15	5	14	5	3	31	16	0	2	3	3
denovo264	Bacteria; __Firmicutes; __Bacilli; __Lactobacillales; __Streptococcaceae; __Streptococcus; __Streptococcus mutans	Bacteria	__Firmicutes	__Bacilli	__Lactobacillales	__Streptococcaceae	__Streptococcus	__Streptococcus mutans	1	1	NR_113641.1	NA	NA	0	0	0	0	0	0	0	0	0	0	0	0	0	0	119
denovo265	Bacteria; __Proteobacteria; __Gammaproteobacteria; __Alteromonadales; __Alteromonadaceae; __Marinobacter; __Marinobacter algicola	Bacteria	__Proteobacteria	__Gammaproteobacteria	__Alteromonadales	__Alteromonadaceae	__Marinobacter	__Marinobacter algicola	1	1	NR_042807.1	NA	NA	2	8	47	2	11	11	5	8	5	0	9	1	8	6	0
denovo266	Bacteria; __Proteobacteria; __Gammaproteobacteria; __Chromatiales; __Ectothiorhodospiraceae; __Thiohalomonas; __Thiohalomonas denitrificans	Bacteria	__Proteobacteria	__Gammaproteobacteria	__Chromatiales	__Ectothiorhodospiraceae	__Thiohalomonas	__Thiohalomonas denitrificans	1	1	NR_044097.1	NA	NA	15	0	4	41	3	0	64	5	2	4	2	0	0	0	0
denovo267	Bacteria; __Bacteroidetes; __Saprospiria; __Saprospirales; __Saprospiraceae; __Aureispira; __Aureispira maritima	Bacteria	__Bacteroidetes	__Saprospiria	__Saprospirales	__Saprospiraceae	__Aureispira	__Aureispira maritima	1	1	NR_041537.1	NA	NA	0	0	0	0	0	1	0	0	0	31	21	46	24	0	0
denovo268	Bacteria; __Cyanobacteria; __; __Nostocales; __Calotrichaceae; __Dulcicalothrix; __Dulcicalothrix necridiiformans	Bacteria	__Cyanobacteria	__	__Nostocales	__Calotrichaceae	__Dulcicalothrix	__Dulcicalothrix necridiiformans	1	1	NR_164867.1	NA	NA	0	0	0	0	0	0	0	0	0	36	20	1	3	0	0
denovo269	Bacteria; __Bacteroidetes; __Sphingobacteriia; __Sphingobacteriales; __Sphingobacteriaceae; __Pedobacter; __Pedobacter psychrophilus	Bacteria	__Bacteroidetes	__Sphingobacteriia	__Sphingobacteriales	__Sphingobacteriaceae	__Pedobacter	__Pedobacter psychrophilus	1	1	NR_157712.1	NA	NA	0	7	8	0	1	3	0	5	6	41	50	0	6	0	0
denovo270	Bacteria; __Proteobacteria; __Gammaproteobacteria; __; __; __Thiolapillus; __Thiolapillus brandeum	Bacteria	__Proteobacteria	__Gammaproteobacteria	__	__	__Thiolapillus	__Thiolapillus brandeum	1	1	NR_148757.1	NA	NA	0	0	0	0	0	0	0	0	0	0	0	3	7	77	0
denovo271	Bacteria; __Proteobacteria; __Alphaproteobacteria; __Pelagibacterales; __Pelagibacteraceae; __Candidatus Pelagibacter; __Candidatus Pelagibacter ubique	Bacteria	__Proteobacteria	__Alphaproteobacteria	__Pelagibacterales	__Pelagibacteraceae	__Candidatus Pelagibacter	__Candidatus Pelagibacter ubique	1	1	NR_074224.1	NA	NA	0	15	20	0	8	29	0	2	9	0	2	0	1	17	0
denovo272	Bacteria; __Nitrospinae; __Nitrospinia; __Nitrospinales; __Nitrospinaceae; __Nitrospina; __Nitrospina gracilis	Bacteria	__Nitrospinae	__Nitrospinia	__Nitrospinales	__Nitrospinaceae	__Nitrospina	__Nitrospina gracilis	1	1	NR_104821.1	NA	NA	0	0	0	0	0	0	0	0	0	0	0	1	2	72	0
denovo273	Bacteria; __Proteobacteria; __Gammaproteobacteria; __Pseudomonadales; __Moraxellaceae; __Acinetobacter; __Acinetobacter lwoffii	Bacteria	__Proteobacteria	__Gammaproteobacteria	__Pseudomonadales	__Moraxellaceae	__Acinetobacter	__Acinetobacter lwoffii	1	1	NR_113346.1	NA	NA	0	0	1	0	0	0	0	0	2	0	0	1	0	0	157
denovo274	Bacteria; __Proteobacteria; __Gammaproteobacteria; __Cellvibrionales; __Cellvibrionaceae; __Eionea; __Eionea nigra	Bacteria	__Proteobacteria	__Gammaproteobacteria	__Cellvibrionales	__Cellvibrionaceae	__Eionea	__Eionea nigra	1	1	NR_115270.1	NA	NA	24	0	2	108	2	2	69	1	1	0	0	0	0	0	0
denovo275	Bacteria; __Proteobacteria; __Oligoflexia; __Bacteriovoracales; __Halobacteriovoraceae; __Halobacteriovorax; __Halobacteriovorax marinus	Bacteria	__Proteobacteria	__Oligoflexia	__Bacteriovoracales	__Halobacteriovoraceae	__Halobacteriovorax	__Halobacteriovorax marinus	1	1	NR_102485.1	NA	NA	0	11	1	1	20	21	3	3	10	1	5	0	5	1	0
denovo276	Bacteria; __Bacteroidetes; __Flavobacteriia; __Flavobacteriales; __Flavobacteriaceae; __Gillisia; __Gillisia marina	Bacteria	__Bacteroidetes	__Flavobacteriia	__Flavobacteriales	__Flavobacteriaceae	__Gillisia	__Gillisia marina	1	1	NR_109623.1	NA	NA	0	0	0	0	9	0	0	8	3	0	10	0	31	2	0
denovo277	; __; __; __; __; __; __		__	__	__	__	__	__	1	1	NA	NA	NA	0	38	4	0	4	3	0	0	8	9	11	19	14	60	0
denovo278	Bacteria; __Proteobacteria; __Deltaproteobacteria; __Desulfuromonadales; __Geobacteraceae; __Geoalkalibacter; __Geoalkalibacter subterraneus	Bacteria	__Proteobacteria	__Deltaproteobacteria	__Desulfuromonadales	__Geobacteraceae	__Geoalkalibacter	__Geoalkalibacter subterraneus	1	1	NR_044429.1	NA	NA	0	0	2	0	0	3	0	0	0	2	3	9	34	4	0
denovo279	; __; __; __; __; __; __		__	__	__	__	__	__	1	1	NA	NA	NA	0	27	20	0	0	18	0	0	12	0	0	0	0	1	0
denovo280	Bacteria; __Verrucomicrobia; __Verrucomicrobiae; __Verrucomicrobiales; __Rubritaleaceae; __Rubritalea; __Rubritalea halochordaticola	Bacteria	__Verrucomicrobia	__Verrucomicrobiae	__Verrucomicrobiales	__Rubritaleaceae	__Rubritalea	__Rubritalea halochordaticola	1	1	NR_113049.1	NA	NA	0	0	1	0	0	3	0	0	3	0	0	0	10	112	0
denovo281	Bacteria; __Proteobacteria; __Gammaproteobacteria; __Cellvibrionales; __Cellvibrionaceae; __Eionea; __Eionea nigra	Bacteria	__Proteobacteria	__Gammaproteobacteria	__Cellvibrionales	__Cellvibrionaceae	__Eionea	__Eionea nigra	1	1	NR_115270.1	NA	NA	0	0	1	0	0	3	0	0	2	5	22	4	24	50	0
denovo282	Bacteria; __Cyanobacteria; __; __Oscillatoriales; __Oscillatoriaceae; __Aerosakkonema; __Aerosakkonema funiforme	Bacteria	__Cyanobacteria	__	__Oscillatoriales	__Oscillatoriaceae	__Aerosakkonema	__Aerosakkonema funiforme	1	1	NR_114306.1	NA	NA	0	0	0	0	0	0	0	0	0	0	0	0	0	0	119
denovo283	Bacteria; __Actinobacteria; __Actinobacteria; __Sporichthyales; __Sporichthyaceae; __Longivirga; __Longivirga aurantiaca	Bacteria	__Actinobacteria	__Actinobacteria	__Sporichthyales	__Sporichthyaceae	__Longivirga	__Longivirga aurantiaca	1	1	NR_159886.1	NA	NA	1	21	3	2	16	20	1	5	18	45	31	1	17	12	0
denovo284	Bacteria; __Bacteroidetes; __Flavobacteriia; __Flavobacteriales; __Cryomorphaceae; __Owenweeksia; __Owenweeksia hongkongensis	Bacteria	__Bacteroidetes	__Flavobacteriia	__Flavobacteriales	__Cryomorphaceae	__Owenweeksia	__Owenweeksia hongkongensis	1	1	NR_074100.1	NA	NA	0	0	2	0	0	3	0	0	3	5	38	1	51	9	0
denovo285	; __; __; __; __; __; __		__	__	__	__	__	__	1	1	NA	NA	NA	0	32	14	0	5	6	0	0	6	0	0	0	4	14	0
denovo286	Bacteria; __Proteobacteria; __Alphaproteobacteria; __Rhodospirillales; __Rhodospirillaceae; __Magnetospira; __Magnetospira thiophila	Bacteria	__Proteobacteria	__Alphaproteobacteria	__Rhodospirillales	__Rhodospirillaceae	__Magnetospira	__Magnetospira thiophila	1	1	NR_116475.1	NA	NA	0	0	8	0	4	7	0	0	4	20	27	19	21	18	5
denovo287	Bacteria; __Firmicutes; __Bacilli; __Lactobacillales; __Leuconostocaceae; __Weissella; __Weissella confusa	Bacteria	__Firmicutes	__Bacilli	__Lactobacillales	__Leuconostocaceae	__Weissella	__Weissella confusa	1	1	NR_113258.1	NA	NA	0	0	0	0	0	0	0	0	0	0	0	0	0	0	72
denovo288	Bacteria; __Bacteroidetes; __Flavobacteriia; __Flavobacteriales; __Flavobacteriaceae; __Aquimarina; __Aquimarina versatilis	Bacteria	__Bacteroidetes	__Flavobacteriia	__Flavobacteriales	__Flavobacteriaceae	__Aquimarina	__Aquimarina versatilis	1	1	NR_156070.1	NA	NA	0	0	6	0	5	12	4	6	15	0	0	0	0	0	0
denovo289	Bacteria; __Bacteroidetes; __Flavobacteriia; __Flavobacteriales; __Cryomorphaceae; __Phaeocystidibacter; __Phaeocystidibacter luteus	Bacteria	__Bacteroidetes	__Flavobacteriia	__Flavobacteriales	__Cryomorphaceae	__Phaeocystidibacter	__Phaeocystidibacter luteus	1	1	NR_132329.1	NA	NA	0	0	0	0	0	0	0	0	0	7	4	37	20	30	0
denovo290	Bacteria; __Bacteroidetes; __Flavobacteriia; __Flavobacteriales; __Flavobacteriaceae; __Tenacibaculum; __Tenacibaculum haliotis	Bacteria	__Bacteroidetes	__Flavobacteriia	__Flavobacteriales	__Flavobacteriaceae	__Tenacibaculum	__Tenacibaculum haliotis	1	1	NR_158003.1	NA	NA	0	0	5	0	0	0	0	0	0	5	10	3	19	62	0
denovo291	Bacteria; __Proteobacteria; __Alphaproteobacteria; __Rhodospirillales; __; __Reyranella; __Reyranella soli	Bacteria	__Proteobacteria	__Alphaproteobacteria	__Rhodospirillales	__	__Reyranella	__Reyranella soli	1	1	NR_109674.1	NA	NA	0	0	0	0	0	0	0	0	0	0	0	0	0	0	43
denovo292	Bacteria; __Proteobacteria; __Deltaproteobacteria; __Desulfuromonadales; __Geobacteraceae; __Geopsychrobacter; __Geopsychrobacter electrodiphilus	Bacteria	__Proteobacteria	__Deltaproteobacteria	__Desulfuromonadales	__Geobacteraceae	__Geopsychrobacter	__Geopsychrobacter electrodiphilus	1	1	NR_042768.1	NA	NA	0	0	25	0	0	12	0	0	8	0	0	0	4	23	0
denovo293	Bacteria; __Proteobacteria; __Alphaproteobacteria; __Rhodospirillales; __Rhodospirillaceae; __Elstera; __Elstera cyanobacteriorum	Bacteria	__Proteobacteria	__Alphaproteobacteria	__Rhodospirillales	__Rhodospirillaceae	__Elstera	__Elstera cyanobacteriorum	1	1	NR_158149.1	NA	NA	0	6	1	0	1	2	0	1	3	0	1	0	0	1	135
denovo294	Bacteria; __Cyanobacteria; __; __Nostocales; __Scytonemataceae; __Scytonema; __Scytonema hofmannii	Bacteria	__Cyanobacteria	__	__Nostocales	__Scytonemataceae	__Scytonema	__Scytonema hofmannii	1	1	NR_112180.1	NA	NA	0	0	1	1	11	3	4	16	3	0	0	0	0	0	0
denovo295	; __; __; __; __; __; __		__	__	__	__	__	__	1	1	NA	NA	NA	0	10	2	0	0	3	0	0	5	0	0	0	1	61	0
denovo296	Bacteria; __Bacteroidetes; __Flavobacteriia; __Flavobacteriales; __Flavobacteriaceae; __Ulvibacter; __Ulvibacter marinus	Bacteria	__Bacteroidetes	__Flavobacteriia	__Flavobacteriales	__Flavobacteriaceae	__Ulvibacter	__Ulvibacter marinus	1	1	NR_133883.1	NA	NA	2	0	4	0	0	0	3	0	0	0	4	1	17	79	0
denovo297	Bacteria; __Proteobacteria; __Gammaproteobacteria; __Xanthomonadales; __Rhodanobacteraceae; __Dyella; __Dyella jejuensis	Bacteria	__Proteobacteria	__Gammaproteobacteria	__Xanthomonadales	__Rhodanobacteraceae	__Dyella	__Dyella jejuensis	1	1	NR_145542.1	NA	NA	0	0	0	0	0	0	0	0	0	0	0	0	0	0	127
denovo298	Bacteria; __Proteobacteria; __Alphaproteobacteria; __Rhodospirillales; __Rhodospirillaceae; __Ferruginivarius; __Ferruginivarius sediminum	Bacteria	__Proteobacteria	__Alphaproteobacteria	__Rhodospirillales	__Rhodospirillaceae	__Ferruginivarius	__Ferruginivarius sediminum	1	1	NR_165004.1	NA	NA	0	7	3	0	3	5	0	0	1	0	0	4	3	21	0
denovo299	Bacteria; __Proteobacteria; __Alphaproteobacteria; __Rhizobiales; __; __Methyloligella; __Methyloligella solikamskensis	Bacteria	__Proteobacteria	__Alphaproteobacteria	__Rhizobiales	__	__Methyloligella	__Methyloligella solikamskensis	1	1	NR_125614.1	NA	NA	0	33	8	0	5	22	0	0	10	0	1	0	0	12	0
denovo300	; __; __; __; __; __; __		__	__	__	__	__	__	1	1	NA	NA	NA	0	5	0	0	13	1	0	49	1	0	0	0	1	5	0
denovo301	Bacteria; __Bacteroidetes; __Flavobacteriia; __Flavobacteriales; __Flavobacteriaceae; __Chryseobacterium; __Chryseobacterium haifense	Bacteria	__Bacteroidetes	__Flavobacteriia	__Flavobacteriales	__Flavobacteriaceae	__Chryseobacterium	__Chryseobacterium haifense	1	1	NR_044167.1	NA	NA	0	0	0	0	0	0	0	0	0	0	0	0	0	0	139
denovo302	Bacteria; __Proteobacteria; __Gammaproteobacteria; __Oceanospirillales; __Saccharospirillaceae; __Reinekea; __Reinekea marina	Bacteria	__Proteobacteria	__Gammaproteobacteria	__Oceanospirillales	__Saccharospirillaceae	__Reinekea	__Reinekea marina	1	1	NR_147763.1	NA	NA	17	11	7	58	1	3	35	0	0	0	0	0	0	0	0
denovo303	Bacteria; __Bacteroidetes; __Flavobacteriia; __Flavobacteriales; __Crocinitomicaceae; __Salinirepens; __Salinirepens amamiensis	Bacteria	__Bacteroidetes	__Flavobacteriia	__Flavobacteriales	__Crocinitomicaceae	__Salinirepens	__Salinirepens amamiensis	1	1	NR_112980.1	NA	NA	0	0	9	0	35	9	0	25	2	0	0	0	1	10	0
denovo304	Bacteria; __Proteobacteria; __Gammaproteobacteria; __Cellvibrionales; __Microbulbiferaceae; __Microbulbifer; __Microbulbifer marinus	Bacteria	__Proteobacteria	__Gammaproteobacteria	__Cellvibrionales	__Microbulbiferaceae	__Microbulbifer	__Microbulbifer marinus	1	1	NR_108573.1	NA	NA	0	0	0	0	0	0	0	0	0	4	3	29	5	4	0
denovo305	Bacteria; __Bacteroidetes; __Flavobacteriia; __Flavobacteriales; __Cryomorphaceae; __Vicingus; __Vicingus serpentipes	Bacteria	__Bacteroidetes	__Flavobacteriia	__Flavobacteriales	__Cryomorphaceae	__Vicingus	__Vicingus serpentipes	1	1	NR_159281.1	NA	NA	0	0	0	0	0	0	0	0	0	18	18	4	43	3	0
denovo306	Bacteria; __Bacteroidetes; __Flavobacteriia; __Flavobacteriales; __Cryomorphaceae; __Owenweeksia; __Owenweeksia hongkongensis	Bacteria	__Bacteroidetes	__Flavobacteriia	__Flavobacteriales	__Cryomorphaceae	__Owenweeksia	__Owenweeksia hongkongensis	1	1	NR_074100.1	NA	NA	0	0	0	0	0	0	0	0	0	38	14	13	12	5	0
denovo307	Bacteria; __Proteobacteria; __Gammaproteobacteria; __; __; __Pseudohongiella; __Pseudohongiella nitratireducens	Bacteria	__Proteobacteria	__Gammaproteobacteria	__	__	__Pseudohongiella	__Pseudohongiella nitratireducens	1	1	NR_153732.1	NA	NA	0	9	9	2	2	13	6	2	3	2	7	0	1	2	0
denovo308	Bacteria; __Proteobacteria; __Alphaproteobacteria; __Rickettsiales; __Rickettsiaceae; __Rickettsia; __Rickettsia japonica	Bacteria	__Proteobacteria	__Alphaproteobacteria	__Rickettsiales	__Rickettsiaceae	__Rickettsia	__Rickettsia japonica	1	1	NR_074459.2	NA	NA	0	2	0	1	77	1	0	0	4	0	0	0	0	0	0
denovo309	; __; __; __; __; __; __		__	__	__	__	__	__	1	1	NA	NA	NA	0	20	13	0	0	4	0	0	3	0	0	0	0	0	0
denovo310	Bacteria; __Proteobacteria; __Gammaproteobacteria; __Alteromonadales; __Alteromonadaceae; __Alkalimarinus; __Alkalimarinus sediminis	Bacteria	__Proteobacteria	__Gammaproteobacteria	__Alteromonadales	__Alteromonadaceae	__Alkalimarinus	__Alkalimarinus sediminis	1	1	NR_137384.1	NA	NA	0	3	0	1	49	5	0	1	6	0	0	0	0	0	0
denovo311	Bacteria; __Proteobacteria; __Alphaproteobacteria; __Rhizobiales; __Methylobacteriaceae; __Methylobacterium; __Methylobacterium bullatum	Bacteria	__Proteobacteria	__Alphaproteobacteria	__Rhizobiales	__Methylobacteriaceae	__Methylobacterium	__Methylobacterium bullatum	1	1	NR_117561.1	NA	NA	0	0	1	0	0	0	0	0	0	0	0	0	0	0	60
denovo312	Bacteria; __Firmicutes; __Bacilli; __Bacillales; __; __Exiguobacterium; __Exiguobacterium aurantiacum	Bacteria	__Firmicutes	__Bacilli	__Bacillales	__	__Exiguobacterium	__Exiguobacterium aurantiacum	1	1	NR_113666.1	NA	NA	63	3	12	1	0	0	1	0	0	0	0	0	0	0	0
denovo313	Bacteria; __Proteobacteria; __Gammaproteobacteria; __Pseudomonadales; __Moraxellaceae; __Acinetobacter; __Acinetobacter johnsonii	Bacteria	__Proteobacteria	__Gammaproteobacteria	__Pseudomonadales	__Moraxellaceae	__Acinetobacter	__Acinetobacter johnsonii	1	1	NR_164627.1	NA	NA	1	0	0	0	0	0	2	0	0	0	0	1	0	0	417
denovo314	Bacteria; __Proteobacteria; __Gammaproteobacteria; __Alteromonadales; __Alteromonadaceae; __Marinobacter; __Marinobacter lutaoensis	Bacteria	__Proteobacteria	__Gammaproteobacteria	__Alteromonadales	__Alteromonadaceae	__Marinobacter	__Marinobacter lutaoensis	1	1	NR_025116.1	NA	NA	0	4	7	0	0	4	0	0	0	0	0	0	0	0	0
denovo315	; __; __; __; __; __; __		__	__	__	__	__	__	1	1	NA	NA	NA	0	0	0	0	0	0	0	0	0	19	5	33	6	3	0
denovo316	; __; __; __; __; __; __		__	__	__	__	__	__	1	1	NA	NA	NA	0	45	20	0	4	21	0	0	12	0	0	0	0	0	0
denovo317	Bacteria; __Verrucomicrobia; __Verrucomicrobiae; __Verrucomicrobiales; __Verrucomicrobiaceae; __Luteolibacter; __Luteolibacter algae	Bacteria	__Verrucomicrobia	__Verrucomicrobiae	__Verrucomicrobiales	__Verrucomicrobiaceae	__Luteolibacter	__Luteolibacter algae	1	1	NR_041624.1	NA	NA	0	0	25	0	0	6	0	0	1	31	11	0	2	7	0
denovo318	Bacteria; __Proteobacteria; __Gammaproteobacteria; __Chromatiales; __Thioprofundaceae; __Thioprofundum; __Thioprofundum lithotrophicum	Bacteria	__Proteobacteria	__Gammaproteobacteria	__Chromatiales	__Thioprofundaceae	__Thioprofundum	__Thioprofundum lithotrophicum	1	1	NR_112829.1	NA	NA	0	41	8	0	11	19	0	0	9	8	13	26	10	64	0
denovo319	Bacteria; __Bacteroidetes; __Flavobacteriia; __Flavobacteriales; __Flavobacteriaceae; __Gramella; __Gramella jeungdoensis	Bacteria	__Bacteroidetes	__Flavobacteriia	__Flavobacteriales	__Flavobacteriaceae	__Gramella	__Gramella jeungdoensis	1	1	NR_132680.1	NA	NA	0	4	2	0	0	3	0	0	3	1	31	0	19	19	0
denovo320	Bacteria; __Proteobacteria; __Alphaproteobacteria; __; __; __Phreatobacter; __Phreatobacter oligotrophus	Bacteria	__Proteobacteria	__Alphaproteobacteria	__	__	__Phreatobacter	__Phreatobacter oligotrophus	1	1	NR_133817.1	NA	NA	0	0	0	0	0	0	0	0	0	0	0	0	0	0	58
denovo321	Bacteria; __Cyanobacteria; __; __Nostocales; __Calotrichaceae; __Dulcicalothrix; __Dulcicalothrix necridiiformans	Bacteria	__Cyanobacteria	__	__Nostocales	__Calotrichaceae	__Dulcicalothrix	__Dulcicalothrix necridiiformans	1	1	NR_164867.1	NA	NA	14	2	0	17	9	1	20	25	2	1	2	1	0	0	0
denovo322	Bacteria; __Proteobacteria; __Gammaproteobacteria; __; __; __Thiolapillus; __Thiolapillus brandeum	Bacteria	__Proteobacteria	__Gammaproteobacteria	__	__	__Thiolapillus	__Thiolapillus brandeum	1	1	NR_148757.1	NA	NA	0	1	5	0	0	3	0	0	2	0	0	0	0	22	0
denovo323	Bacteria; __Proteobacteria; __Alphaproteobacteria; __Rhodobacterales; __Rhodobacteraceae; __Flavimaricola; __Flavimaricola marinus	Bacteria	__Proteobacteria	__Alphaproteobacteria	__Rhodobacterales	__Rhodobacteraceae	__Flavimaricola	__Flavimaricola marinus	1	1	NR_149784.1	NA	NA	16	0	1	0	0	0	12	0	1	0	0	3	7	1	0
denovo324	Bacteria; __Proteobacteria; __Gammaproteobacteria; __Aeromonadales; __Aeromonadaceae; __Aeromonas; __Aeromonas salmonicida	Bacteria	__Proteobacteria	__Gammaproteobacteria	__Aeromonadales	__Aeromonadaceae	__Aeromonas	__Aeromonas salmonicida	1	1	NR_118547.1	NA	NA	0	0	0	0	0	0	0	0	0	0	0	0	0	0	38
denovo325	Bacteria; __Cyanobacteria; __; __Nostocales; __Nostocaceae; __Cylindrospermum; __Cylindrospermum stagnale	Bacteria	__Cyanobacteria	__	__Nostocales	__Nostocaceae	__Cylindrospermum	__Cylindrospermum stagnale	1	1	NR_102462.1	NA	NA	31	0	2	0	0	0	0	0	2	0	0	0	0	0	0
denovo326	; __; __; __; __; __; __		__	__	__	__	__	__	1	1	NA	NA	NA	0	17	2	0	0	3	0	0	1	0	0	0	0	0	0
denovo327	Bacteria; __Bacteroidetes; __Flavobacteriia; __Flavobacteriales; __Cryomorphaceae; __Owenweeksia; __Owenweeksia hongkongensis	Bacteria	__Bacteroidetes	__Flavobacteriia	__Flavobacteriales	__Cryomorphaceae	__Owenweeksia	__Owenweeksia hongkongensis	1	1	NR_074100.1	NA	NA	0	0	0	0	0	0	0	0	0	5	21	4	43	4	0
denovo328	Bacteria; __Proteobacteria; __Betaproteobacteria; __Nitrosomonadales; __Methylophilaceae; __Methylophilus; __Methylophilus leisingeri	Bacteria	__Proteobacteria	__Betaproteobacteria	__Nitrosomonadales	__Methylophilaceae	__Methylophilus	__Methylophilus leisingeri	1	1	NR_041258.1	NA	NA	0	54	10	1	12	14	1	0	6	13	8	4	7	13	0
denovo329	Bacteria; __Bacteroidetes; __Flavobacteriia; __Flavobacteriales; __Cryomorphaceae; __Vicingus; __Vicingus serpentipes	Bacteria	__Bacteroidetes	__Flavobacteriia	__Flavobacteriales	__Cryomorphaceae	__Vicingus	__Vicingus serpentipes	1	1	NR_159281.1	NA	NA	0	0	27	0	0	20	0	0	11	0	0	0	0	27	0
denovo330	Bacteria; __Bacteroidetes; __Cytophagia; __Cytophagales; __Cytophagaceae; __Marinoscillum; __Marinoscillum luteum	Bacteria	__Bacteroidetes	__Cytophagia	__Cytophagales	__Cytophagaceae	__Marinoscillum	__Marinoscillum luteum	1	1	NR_108992.1	NA	NA	0	3	0	2	7	0	1	13	0	0	0	0	0	0	0
denovo331	Bacteria; __Bacteroidetes; __Flavobacteriia; __Flavobacteriales; __Flavobacteriaceae; __Polaribacter; __Polaribacter huanghezhanensis	Bacteria	__Bacteroidetes	__Flavobacteriia	__Flavobacteriales	__Flavobacteriaceae	__Polaribacter	__Polaribacter huanghezhanensis	1	1	NR_133821.1	NA	NA	4	7	0	1	5	7	3	30	6	0	0	0	0	0	0
denovo332	Bacteria; __Proteobacteria; __Deltaproteobacteria; __Desulfovibrionales; __Desulfohalobiaceae; __Desulfohalophilus; __Desulfohalophilus alkaliarsenatis	Bacteria	__Proteobacteria	__Deltaproteobacteria	__Desulfovibrionales	__Desulfohalobiaceae	__Desulfohalophilus	__Desulfohalophilus alkaliarsenatis	1	1	NR_132701.1	NA	NA	0	0	16	0	1	30	0	0	28	0	0	0	0	0	0
denovo333	Bacteria; __Bacteroidetes; __Bacteroidia; __Bacteroidales; __Prevotellaceae; __Prevotella; __Prevotella histicola	Bacteria	__Bacteroidetes	__Bacteroidia	__Bacteroidales	__Prevotellaceae	__Prevotella	__Prevotella histicola	1	1	NR_113105.1	NA	NA	0	0	0	0	0	0	0	0	0	0	0	0	0	0	44
denovo334	Bacteria; __Proteobacteria; __Betaproteobacteria; __Burkholderiales; __Burkholderiaceae; __Ralstonia; __Ralstonia insidiosa	Bacteria	__Proteobacteria	__Betaproteobacteria	__Burkholderiales	__Burkholderiaceae	__Ralstonia	__Ralstonia insidiosa	1	1	NR_025242.1	NA	NA	5	0	4	0	0	3	48	0	6	0	0	0	0	0	0
denovo335	Bacteria; __Proteobacteria; __Betaproteobacteria; __Burkholderiales; __Comamonadaceae; __Hydrogenophaga; __Hydrogenophaga laconesensis	Bacteria	__Proteobacteria	__Betaproteobacteria	__Burkholderiales	__Comamonadaceae	__Hydrogenophaga	__Hydrogenophaga laconesensis	1	1	NR_149183.1	NA	NA	0	0	0	0	0	0	0	0	0	0	0	0	0	0	54
denovo336	Bacteria; __Verrucomicrobia; __Opitutae; __Puniceicoccales; __Puniceicoccaceae; __Coraliomargarita; __Coraliomargarita akajimensis	Bacteria	__Verrucomicrobia	__Opitutae	__Puniceicoccales	__Puniceicoccaceae	__Coraliomargarita	__Coraliomargarita akajimensis	1	1	NR_074901.1	NA	NA	0	0	11	0	2	6	0	0	5	0	1	2	11	46	0
denovo337	Bacteria; __Proteobacteria; __Gammaproteobacteria; __Alteromonadales; __Colwelliaceae; __Colwellia; __Colwellia aquaemaris	Bacteria	__Proteobacteria	__Gammaproteobacteria	__Alteromonadales	__Colwelliaceae	__Colwellia	__Colwellia aquaemaris	1	1	NR_134008.1	NA	NA	0	0	1	0	0	0	0	0	0	2	6	3	7	8	0
denovo338	Bacteria; __Proteobacteria; __Alphaproteobacteria; __Sphingomonadales; __Sphingomonadaceae; __Sphingorhabdus; __Sphingorhabdus wooponensis	Bacteria	__Proteobacteria	__Alphaproteobacteria	__Sphingomonadales	__Sphingomonadaceae	__Sphingorhabdus	__Sphingorhabdus wooponensis	1	1	NR_109148.1	NA	NA	0	5	3	0	2	4	0	0	2	0	0	0	0	0	0
denovo339	Bacteria; __Bacteroidetes; __Flavobacteriia; __Flavobacteriales; __Flavobacteriaceae; __Mesoflavibacter; __Mesoflavibacter sabulilitoris	Bacteria	__Bacteroidetes	__Flavobacteriia	__Flavobacteriales	__Flavobacteriaceae	__Mesoflavibacter	__Mesoflavibacter sabulilitoris	1	1	NR_134082.1	NA	NA	0	0	4	0	0	4	0	0	0	0	6	0	9	27	0
denovo340	Bacteria; __Bacteroidetes; __Flavobacteriia; __Flavobacteriales; __Cryomorphaceae; __Vicingus; __Vicingus serpentipes	Bacteria	__Bacteroidetes	__Flavobacteriia	__Flavobacteriales	__Cryomorphaceae	__Vicingus	__Vicingus serpentipes	1	1	NR_159281.1	NA	NA	0	4	0	0	0	0	0	0	0	45	10	2	26	2	0
denovo341	Bacteria; __Proteobacteria; __Gammaproteobacteria; __Thiotrichales; __Francisellaceae; __Allofrancisella; __Allofrancisella frigidaquae	Bacteria	__Proteobacteria	__Gammaproteobacteria	__Thiotrichales	__Francisellaceae	__Allofrancisella	__Allofrancisella frigidaquae	1	1	NR_152718.1	NA	NA	0	0	0	0	0	0	0	0	0	63	1	3	1	0	0
denovo342	; __; __; __; __; __; __		__	__	__	__	__	__	1	1	NA	NA	NA	0	1	13	0	1	12	0	0	12	0	0	0	0	13	0
denovo343	; __; __; __; __; __; __		__	__	__	__	__	__	1	1	NA	NA	NA	13	0	4	3	0	4	0	0	0	8	0	2	1	0	0
denovo344	Bacteria; __Bacteroidetes; __Flavobacteriia; __Flavobacteriales; __Cryomorphaceae; __Owenweeksia; __Owenweeksia hongkongensis	Bacteria	__Bacteroidetes	__Flavobacteriia	__Flavobacteriales	__Cryomorphaceae	__Owenweeksia	__Owenweeksia hongkongensis	1	1	NR_074100.1	NA	NA	0	0	2	0	0	0	0	0	1	0	0	0	6	5	0
denovo345	Bacteria; __Proteobacteria; __Gammaproteobacteria; __Cellvibrionales; __Porticoccaceae; __Porticoccus; __Porticoccus hydrocarbonoclasticus	Bacteria	__Proteobacteria	__Gammaproteobacteria	__Cellvibrionales	__Porticoccaceae	__Porticoccus	__Porticoccus hydrocarbonoclasticus	1	1	NR_118247.1	NA	NA	0	11	1	0	7	1	1	0	0	1	3	0	0	0	0
denovo346	Bacteria; __Bacteroidetes; __Flavobacteriia; __Flavobacteriales; __Cryomorphaceae; __Owenweeksia; __Owenweeksia hongkongensis	Bacteria	__Bacteroidetes	__Flavobacteriia	__Flavobacteriales	__Cryomorphaceae	__Owenweeksia	__Owenweeksia hongkongensis	1	1	NR_074100.1	NA	NA	0	0	0	0	0	1	0	0	3	0	0	0	0	15	0
denovo347	Bacteria; __Bacteroidetes; __Flavobacteriia; __Flavobacteriales; __Flavobacteriaceae; __Flavobacterium; __Flavobacterium limicola	Bacteria	__Bacteroidetes	__Flavobacteriia	__Flavobacteriales	__Flavobacteriaceae	__Flavobacterium	__Flavobacterium limicola	1	1	NR_118473.1	NA	NA	14	8	41	0	0	0	0	0	4	0	0	0	0	0	0
denovo348	Bacteria; __Bacteroidetes; __Flavobacteriia; __Flavobacteriales; __Flavobacteriaceae; __Leeuwenhoekiella; __Leeuwenhoekiella aequorea	Bacteria	__Bacteroidetes	__Flavobacteriia	__Flavobacteriales	__Flavobacteriaceae	__Leeuwenhoekiella	__Leeuwenhoekiella aequorea	1	1	NR_042022.1	NA	NA	1	1	6	0	2	3	0	0	1	3	0	1	0	3	0
denovo349	; __; __; __; __; __; __		__	__	__	__	__	__	1	1	NA	NA	NA	0	22	31	0	4	19	0	0	10	0	0	0	6	24	0
denovo350	Bacteria; __Proteobacteria; __Betaproteobacteria; __Burkholderiales; __Oxalobacteraceae; __Noviherbaspirillum; __Noviherbaspirillum suwonense	Bacteria	__Proteobacteria	__Betaproteobacteria	__Burkholderiales	__Oxalobacteraceae	__Noviherbaspirillum	__Noviherbaspirillum suwonense	1	1	NR_133798.1	NA	NA	0	0	0	0	0	0	0	0	0	0	0	0	0	0	27
denovo351	Bacteria; __Firmicutes; __Bacilli; __Lactobacillales; __Enterococcaceae; __Enterococcus; __Enterococcus cecorum	Bacteria	__Firmicutes	__Bacilli	__Lactobacillales	__Enterococcaceae	__Enterococcus	__Enterococcus cecorum	1	1	NR_113923.1	NA	NA	0	0	0	0	0	0	0	0	0	0	0	0	0	0	13
denovo352	Bacteria; __Bacteroidetes; __Flavobacteriia; __Flavobacteriales; __Flavobacteriaceae; __Cloacibacterium; __Cloacibacterium normanense	Bacteria	__Bacteroidetes	__Flavobacteriia	__Flavobacteriales	__Flavobacteriaceae	__Cloacibacterium	__Cloacibacterium normanense	1	1	NR_042187.1	NA	NA	0	0	0	0	0	0	0	0	0	0	0	0	0	0	34
denovo353	Bacteria; __Proteobacteria; __Gammaproteobacteria; __Pseudomonadales; __Pseudomonadaceae; __Pseudomonas; __Pseudomonas glareae	Bacteria	__Proteobacteria	__Gammaproteobacteria	__Pseudomonadales	__Pseudomonadaceae	__Pseudomonas	__Pseudomonas glareae	1	1	NR_145562.1	NA	NA	1	0	1	0	1	8	0	0	3	3	0	10	12	2	3
denovo354	; __; __; __; __; __; __		__	__	__	__	__	__	1	1	NA	NA	NA	5	0	0	2	0	0	0	0	0	0	2	1	0	0	0
denovo355	Bacteria; __Cyanobacteria; __; __Pleurocapsales; __Xenococcaceae; __Foliisarcina; __Foliisarcina bertiogensis	Bacteria	__Cyanobacteria	__	__Pleurocapsales	__Xenococcaceae	__Foliisarcina	__Foliisarcina bertiogensis	1	1	NR_148664.1	NA	NA	0	0	0	0	0	0	0	0	0	7	4	7	2	0	0
denovo356	Bacteria; __Proteobacteria; __Gammaproteobacteria; __Pseudomonadales; __Moraxellaceae; __Psychrobacter; __Psychrobacter submarinus	Bacteria	__Proteobacteria	__Gammaproteobacteria	__Pseudomonadales	__Moraxellaceae	__Psychrobacter	__Psychrobacter submarinus	1	1	NR_025457.1	NA	NA	35	1	1	0	0	2	0	0	0	0	0	0	0	0	0
denovo357	Bacteria; __Actinobacteria; __Actinobacteria; __Corynebacteriales; __Nocardiaceae; __Rhodococcus; __Rhodococcus sovatensis	Bacteria	__Actinobacteria	__Actinobacteria	__Corynebacteriales	__Nocardiaceae	__Rhodococcus	__Rhodococcus sovatensis	1	1	NR_156055.1	NA	NA	7	3	20	5	1	2	5	0	2	2	0	6	3	1	10
denovo358	Bacteria; __Proteobacteria; __Gammaproteobacteria; __Cellvibrionales; __Halieaceae; __Marimicrobium; __Marimicrobium arenosum	Bacteria	__Proteobacteria	__Gammaproteobacteria	__Cellvibrionales	__Halieaceae	__Marimicrobium	__Marimicrobium arenosum	1	1	NR_148595.1	NA	NA	0	0	12	0	4	15	3	0	13	0	5	0	3	17	0
denovo359	Bacteria; __Proteobacteria; __Gammaproteobacteria; __Cellvibrionales; __Porticoccaceae; __Porticoccus; __Porticoccus hydrocarbonoclasticus	Bacteria	__Proteobacteria	__Gammaproteobacteria	__Cellvibrionales	__Porticoccaceae	__Porticoccus	__Porticoccus hydrocarbonoclasticus	1	1	NR_118247.1	NA	NA	0	35	8	0	16	7	0	3	3	1	0	0	0	0	0
denovo360	; __; __; __; __; __; __		__	__	__	__	__	__	1	1	NA	NA	NA	0	0	0	0	0	0	0	0	0	1	0	3	16	49	0
denovo361	Bacteria; __Firmicutes; __Clostridia; __Clostridiales; __Peptostreptococcaceae; __Paeniclostridium; __Paeniclostridium sordellii	Bacteria	__Firmicutes	__Clostridia	__Clostridiales	__Peptostreptococcaceae	__Paeniclostridium	__Paeniclostridium sordellii	1	1	NR_113140.1	NA	NA	0	0	0	0	0	0	0	0	0	0	0	0	0	0	15
denovo362	; __; __; __; __; __; __		__	__	__	__	__	__	1	1	NA	NA	NA	0	2	0	0	0	0	0	0	1	0	0	4	0	11	0
denovo363	Bacteria; __Firmicutes; __Negativicutes; __Veillonellales; __Veillonellaceae; __Anaeroglobus; __Anaeroglobus geminatus	Bacteria	__Firmicutes	__Negativicutes	__Veillonellales	__Veillonellaceae	__Anaeroglobus	__Anaeroglobus geminatus	1	1	NR_028812.1	NA	NA	0	0	0	0	0	0	0	0	0	0	0	0	0	0	35
denovo364	Bacteria; __Planctomycetes; __Planctomycetia; __Pirellulales; __Pirellulaceae; __Rhodopirellula; __Rhodopirellula caenicola	Bacteria	__Planctomycetes	__Planctomycetia	__Pirellulales	__Pirellulaceae	__Rhodopirellula	__Rhodopirellula caenicola	1	1	NR_136448.1	NA	NA	0	7	8	0	3	16	0	0	9	0	0	0	0	1	0
denovo365	Bacteria; __Actinobacteria; __Actinobacteria; __Micrococcales; __Micrococcaceae; __Kocuria; __Kocuria marina	Bacteria	__Actinobacteria	__Actinobacteria	__Micrococcales	__Micrococcaceae	__Kocuria	__Kocuria marina	1	1	NR_025723.1	NA	NA	0	0	0	0	0	0	0	0	0	0	0	0	0	0	19
denovo366	Bacteria; __Firmicutes; __Negativicutes; __Veillonellales; __Veillonellaceae; __Veillonella; __Veillonella atypica	Bacteria	__Firmicutes	__Negativicutes	__Veillonellales	__Veillonellaceae	__Veillonella	__Veillonella atypica	1	1	NR_119170.1	NA	NA	0	0	0	0	0	0	0	0	0	0	0	0	0	0	63
denovo367	Bacteria; __Proteobacteria; __Gammaproteobacteria; __Oceanospirillales; __Alcanivoracaceae; __Alcanivorax; __Alcanivorax jadensis	Bacteria	__Proteobacteria	__Gammaproteobacteria	__Oceanospirillales	__Alcanivoracaceae	__Alcanivorax	__Alcanivorax jadensis	1	1	NR_025271.1	NA	NA	3	0	3	7	0	0	7	2	2	1	0	0	0	0	0
denovo368	; __; __; __; __; __; __		__	__	__	__	__	__	1	1	NA	NA	NA	0	0	0	0	0	0	0	0	0	20	0	0	0	0	0
denovo369	Bacteria; __Firmicutes; __Clostridia; __Clostridiales; __Ruminococcaceae; __Faecalibacterium; __Faecalibacterium prausnitzii	Bacteria	__Firmicutes	__Clostridia	__Clostridiales	__Ruminococcaceae	__Faecalibacterium	__Faecalibacterium prausnitzii	1	1	NR_028961.1	NA	NA	0	0	0	0	0	0	0	0	0	0	0	0	0	0	12
denovo370	Bacteria; __Firmicutes; __Bacilli; __Bacillales; __; __Gemella; __Gemella taiwanensis	Bacteria	__Firmicutes	__Bacilli	__Bacillales	__	__Gemella	__Gemella taiwanensis	1	1	NR_133753.1	NA	NA	0	0	0	0	0	0	0	0	0	0	0	0	0	0	28
denovo371	Bacteria; __Cyanobacteria; __; __Nostocales; __Calotrichaceae; __Dulcicalothrix; __Dulcicalothrix necridiiformans	Bacteria	__Cyanobacteria	__	__Nostocales	__Calotrichaceae	__Dulcicalothrix	__Dulcicalothrix necridiiformans	1	1	NR_164867.1	NA	NA	0	0	0	0	0	0	0	0	0	10	12	28	7	1	0
denovo372	Bacteria; __Proteobacteria; __Gammaproteobacteria; __Chromatiales; __Thioprofundaceae; __Thioprofundum; __Thioprofundum lithotrophicum	Bacteria	__Proteobacteria	__Gammaproteobacteria	__Chromatiales	__Thioprofundaceae	__Thioprofundum	__Thioprofundum lithotrophicum	1	1	NR_112829.1	NA	NA	0	0	0	0	0	0	0	0	0	2	4	0	2	28	0
denovo373	Bacteria; __Proteobacteria; __Betaproteobacteria; __Nitrosomonadales; __Methylophilaceae; __Methylotenera; __Methylotenera versatilis	Bacteria	__Proteobacteria	__Betaproteobacteria	__Nitrosomonadales	__Methylophilaceae	__Methylotenera	__Methylotenera versatilis	1	1	NR_074693.1	NA	NA	0	0	0	0	0	0	0	0	0	0	0	0	0	0	46
denovo374	Bacteria; __Proteobacteria; __Deltaproteobacteria; __Desulfobacterales; __Desulfobacteraceae; __Desulfonatronobacter; __Desulfonatronobacter acidivorans	Bacteria	__Proteobacteria	__Deltaproteobacteria	__Desulfobacterales	__Desulfobacteraceae	__Desulfonatronobacter	__Desulfonatronobacter acidivorans	1	1	NR_117486.1	NA	NA	0	1	4	0	0	3	0	0	5	0	0	0	0	0	0
denovo375	Bacteria; __Actinobacteria; __Actinobacteria; __Propionibacteriales; __Nocardioidaceae; __Nocardioides; __Nocardioides salarius	Bacteria	__Actinobacteria	__Actinobacteria	__Propionibacteriales	__Nocardioidaceae	__Nocardioides	__Nocardioides salarius	1	1	NR_044419.1	NA	NA	1	9	1	2	3	2	0	4	1	0	5	0	5	0	0
denovo376	; __; __; __; __; __; __		__	__	__	__	__	__	1	1	NA	NA	NA	0	0	0	0	0	0	0	0	0	8	4	7	0	0	0
denovo377	Bacteria; __Bacteroidetes; __Flavobacteriia; __Flavobacteriales; __Flavobacteriaceae; __Flavicella; __Flavicella marina	Bacteria	__Bacteroidetes	__Flavobacteriia	__Flavobacteriales	__Flavobacteriaceae	__Flavicella	__Flavicella marina	1	1	NR_134724.1	NA	NA	0	0	0	0	0	0	0	0	0	0	3	0	8	23	0
denovo378	Bacteria; __Proteobacteria; __Gammaproteobacteria; __Cellvibrionales; __Porticoccaceae; __Porticoccus; __Porticoccus hydrocarbonoclasticus	Bacteria	__Proteobacteria	__Gammaproteobacteria	__Cellvibrionales	__Porticoccaceae	__Porticoccus	__Porticoccus hydrocarbonoclasticus	1	1	NR_118247.1	NA	NA	2	9	0	8	1	1	14	30	0	1	0	0	3	0	0
denovo379	Bacteria; __Actinobacteria; __Actinobacteria; __Bifidobacteriales; __Bifidobacteriaceae; __Scardovia; __Scardovia wiggsiae	Bacteria	__Actinobacteria	__Actinobacteria	__Bifidobacteriales	__Bifidobacteriaceae	__Scardovia	__Scardovia wiggsiae	1	1	NR_115189.1	NA	NA	0	0	0	0	0	0	0	0	0	0	0	0	0	0	69
denovo380	Bacteria; __Proteobacteria; __Alphaproteobacteria; __Caulobacterales; __Caulobacteraceae; __Brevundimonas; __Brevundimonas subvibrioides	Bacteria	__Proteobacteria	__Alphaproteobacteria	__Caulobacterales	__Caulobacteraceae	__Brevundimonas	__Brevundimonas subvibrioides	1	1	NR_074136.1	NA	NA	0	0	0	0	1	0	0	0	0	0	0	0	0	0	41
denovo381	Bacteria; __Actinobacteria; __Actinobacteria; __Corynebacteriales; __Corynebacteriaceae; __Corynebacterium; __Corynebacterium kroppenstedtii	Bacteria	__Actinobacteria	__Actinobacteria	__Corynebacteriales	__Corynebacteriaceae	__Corynebacterium	__Corynebacterium kroppenstedtii	1	1	NR_074408.1	NA	NA	0	0	0	0	0	0	0	0	0	0	0	0	0	0	13
denovo382	; __; __; __; __; __; __		__	__	__	__	__	__	1	1	NA	NA	NA	2	0	0	0	0	0	0	0	0	22	8	2	0	0	0
denovo383	Bacteria; __Verrucomicrobia; __Verrucomicrobiae; __Verrucomicrobiales; __Verrucomicrobiaceae; __Luteolibacter; __Luteolibacter algae	Bacteria	__Verrucomicrobia	__Verrucomicrobiae	__Verrucomicrobiales	__Verrucomicrobiaceae	__Luteolibacter	__Luteolibacter algae	1	1	NR_041624.1	NA	NA	0	3	11	0	0	1	2	0	0	2	8	0	2	34	0
denovo384	Bacteria; __Bacteroidetes; __Chitinophagia; __Chitinophagales; __Chitinophagaceae; __Chitinophaga; __Chitinophaga eiseniae	Bacteria	__Bacteroidetes	__Chitinophagia	__Chitinophagales	__Chitinophagaceae	__Chitinophaga	__Chitinophaga eiseniae	1	1	NR_116796.1	NA	NA	0	0	0	0	0	0	0	0	0	11	7	5	12	0	0
denovo385	Bacteria; __Proteobacteria; __Gammaproteobacteria; __Thiotrichales; __Piscirickettsiaceae; __Cycloclasticus; __Cycloclasticus spirillensus	Bacteria	__Proteobacteria	__Gammaproteobacteria	__Thiotrichales	__Piscirickettsiaceae	__Cycloclasticus	__Cycloclasticus spirillensus	1	1	NR_115117.1	NA	NA	0	2	0	0	0	3	0	0	0	0	0	0	0	13	0
denovo386	Bacteria; __Proteobacteria; __Gammaproteobacteria; __Methylococcales; __Methylococcaceae; __Methylobacter; __Methylobacter luteus	Bacteria	__Proteobacteria	__Gammaproteobacteria	__Methylococcales	__Methylococcaceae	__Methylobacter	__Methylobacter luteus	1	1	NR_041814.1	NA	NA	0	0	9	0	0	8	0	0	2	0	0	0	0	0	0
denovo387	Bacteria; __Proteobacteria; __Alphaproteobacteria; __Rhodobacterales; __Rhodobacteraceae; __Seohaeicola; __Seohaeicola saemankumensis	Bacteria	__Proteobacteria	__Alphaproteobacteria	__Rhodobacterales	__Rhodobacteraceae	__Seohaeicola	__Seohaeicola saemankumensis	1	1	NR_044437.1	NA	NA	5	28	1	4	3	0	13	2	2	3	1	2	17	0	0
denovo388	Bacteria; __Firmicutes; __Bacilli; __Lactobacillales; __Lactobacillaceae; __Lactobacillus; __Lactobacillus frumenti	Bacteria	__Firmicutes	__Bacilli	__Lactobacillales	__Lactobacillaceae	__Lactobacillus	__Lactobacillus frumenti	1	1	NR_025371.1	NA	NA	0	0	0	0	0	0	0	0	0	0	0	0	0	0	34
denovo389	Bacteria; __Cyanobacteria; __; __Nostocales; __Calotrichaceae; __Dulcicalothrix; __Dulcicalothrix necridiiformans	Bacteria	__Cyanobacteria	__	__Nostocales	__Calotrichaceae	__Dulcicalothrix	__Dulcicalothrix necridiiformans	1	1	NR_164867.1	NA	NA	0	0	1	0	0	0	0	0	0	36	0	0	1	0	0
denovo390	Bacteria; __Verrucomicrobia; __Verrucomicrobiae; __Verrucomicrobiales; __Verrucomicrobiaceae; __Roseibacillus; __Roseibacillus persicicus	Bacteria	__Verrucomicrobia	__Verrucomicrobiae	__Verrucomicrobiales	__Verrucomicrobiaceae	__Roseibacillus	__Roseibacillus persicicus	1	1	NR_041623.1	NA	NA	0	2	20	0	0	3	0	0	2	0	0	0	2	10	0
denovo391	Bacteria; __Proteobacteria; __Deltaproteobacteria; __Desulfuromonadales; __Desulfuromonadaceae; __Pelobacter; __Pelobacter carbinolicus	Bacteria	__Proteobacteria	__Deltaproteobacteria	__Desulfuromonadales	__Desulfuromonadaceae	__Pelobacter	__Pelobacter carbinolicus	1	1	NR_075013.1	NA	NA	0	0	0	0	0	0	0	0	0	0	0	0	0	9	0
denovo392	Bacteria; __Cyanobacteria; __; __Nostocales; __Tolypothrichaceae; __Kryptousia; __Kryptousia macronema	Bacteria	__Cyanobacteria	__	__Nostocales	__Tolypothrichaceae	__Kryptousia	__Kryptousia macronema	1	1	NR_157980.1	NA	NA	8	3	0	4	0	0	8	0	0	0	0	0	0	0	0
denovo393	Bacteria; __Verrucomicrobia; __Verrucomicrobiae; __Verrucomicrobiales; __Rubritaleaceae; __Rubritalea; __Rubritalea spongiae	Bacteria	__Verrucomicrobia	__Verrucomicrobiae	__Verrucomicrobiales	__Rubritaleaceae	__Rubritalea	__Rubritalea spongiae	1	1	NR_041581.1	NA	NA	0	0	0	0	0	0	0	0	0	3	1	0	6	9	0
denovo394	Bacteria; __Verrucomicrobia; __Opitutae; __Puniceicoccales; __Puniceicoccaceae; __Pelagicoccus; __Pelagicoccus albus	Bacteria	__Verrucomicrobia	__Opitutae	__Puniceicoccales	__Puniceicoccaceae	__Pelagicoccus	__Pelagicoccus albus	1	1	NR_041556.1	NA	NA	0	8	9	0	0	5	1	0	9	0	2	2	5	9	0
denovo395	Bacteria; __Proteobacteria; __Alphaproteobacteria; __Rhizobiales; __Rhodobiaceae; __Microbaculum; __Microbaculum marinum	Bacteria	__Proteobacteria	__Alphaproteobacteria	__Rhizobiales	__Rhodobiaceae	__Microbaculum	__Microbaculum marinum	1	1	NR_156846.1	NA	NA	0	30	2	0	5	11	0	0	14	0	0	0	0	2	0
denovo396	Bacteria; __Proteobacteria; __Gammaproteobacteria; __; __; __Pseudohongiella; __Pseudohongiella acticola	Bacteria	__Proteobacteria	__Gammaproteobacteria	__	__	__Pseudohongiella	__Pseudohongiella acticola	1	1	NR_136444.1	NA	NA	0	5	8	0	10	5	0	3	2	0	0	0	0	0	0
denovo397	Bacteria; __Bacteroidetes; __Flavobacteriia; __Flavobacteriales; __Flavobacteriaceae; __Nonlabens; __Nonlabens dokdonensis	Bacteria	__Bacteroidetes	__Flavobacteriia	__Flavobacteriales	__Flavobacteriaceae	__Nonlabens	__Nonlabens dokdonensis	1	1	NR_102491.1	NA	NA	3	0	0	13	0	0	14	0	0	0	0	0	0	0	0
denovo398	Bacteria; __Acidobacteria; __Vicinamibacteria; __; __Vicinamibacteraceae; __Vicinamibacter; __Vicinamibacter silvestris	Bacteria	__Acidobacteria	__Vicinamibacteria	__	__Vicinamibacteraceae	__Vicinamibacter	__Vicinamibacter silvestris	1	1	NR_151905.1	NA	NA	0	2	2	0	0	3	0	0	2	0	0	0	0	0	0
denovo399	Bacteria; __Proteobacteria; __Gammaproteobacteria; __Cellvibrionales; __Cellvibrionaceae; __Eionea; __Eionea nigra	Bacteria	__Proteobacteria	__Gammaproteobacteria	__Cellvibrionales	__Cellvibrionaceae	__Eionea	__Eionea nigra	1	1	NR_115270.1	NA	NA	0	0	0	0	0	0	0	0	0	0	0	0	0	15	0
denovo400	Bacteria; __Proteobacteria; __Gammaproteobacteria; __Chromatiales; __Ectothiorhodospiraceae; __Thiohalomonas; __Thiohalomonas denitrificans	Bacteria	__Proteobacteria	__Gammaproteobacteria	__Chromatiales	__Ectothiorhodospiraceae	__Thiohalomonas	__Thiohalomonas denitrificans	1	1	NR_044097.1	NA	NA	0	6	7	0	0	6	0	0	1	0	0	0	1	19	0
denovo401	Bacteria; __Bacteroidetes; __Flavobacteriia; __Flavobacteriales; __Cryomorphaceae; __Vicingus; __Vicingus serpentipes	Bacteria	__Bacteroidetes	__Flavobacteriia	__Flavobacteriales	__Cryomorphaceae	__Vicingus	__Vicingus serpentipes	1	1	NR_159281.1	NA	NA	0	0	3	0	0	3	0	0	4	0	0	0	0	14	0
denovo402	Bacteria; __Planctomycetes; __Planctomycetia; __Pirellulales; __Pirellulaceae; __Pirellula; __Pirellula staleyi	Bacteria	__Planctomycetes	__Planctomycetia	__Pirellulales	__Pirellulaceae	__Pirellula	__Pirellula staleyi	1	1	NR_074521.1	NA	NA	0	0	3	0	0	6	0	0	11	0	0	0	0	0	0
denovo403	Bacteria; __Firmicutes; __Bacilli; __Lactobacillales; __Lactobacillaceae; __Lactobacillus; __Lactobacillus gastricus	Bacteria	__Firmicutes	__Bacilli	__Lactobacillales	__Lactobacillaceae	__Lactobacillus	__Lactobacillus gastricus	1	1	NR_029084.1	NA	NA	0	0	0	0	0	0	0	0	0	0	0	0	0	0	45
denovo404	Bacteria; __Actinobacteria; __Actinobacteria; __Propionibacteriales; __Nocardioidaceae; __Nocardioides; __Nocardioides furvisabuli	Bacteria	__Actinobacteria	__Actinobacteria	__Propionibacteriales	__Nocardioidaceae	__Nocardioides	__Nocardioides furvisabuli	1	1	NR_043792.1	NA	NA	0	0	0	0	0	0	0	0	0	0	0	0	0	0	45
denovo405	Bacteria; __Bacteroidetes; __Flavobacteriia; __Flavobacteriales; __Crocinitomicaceae; __Salinirepens; __Salinirepens amamiensis	Bacteria	__Bacteroidetes	__Flavobacteriia	__Flavobacteriales	__Crocinitomicaceae	__Salinirepens	__Salinirepens amamiensis	1	1	NR_112980.1	NA	NA	0	0	1	0	2	4	0	0	2	0	0	0	2	8	0
denovo406	; __; __; __; __; __; __		__	__	__	__	__	__	1	1	NA	NA	NA	0	3	2	0	2	0	0	0	2	7	1	12	3	2	0
denovo407	Bacteria; __Proteobacteria; __Alphaproteobacteria; __Caulobacterales; __Caulobacteraceae; __Brevundimonas; __Brevundimonas naejangsanensis	Bacteria	__Proteobacteria	__Alphaproteobacteria	__Caulobacterales	__Caulobacteraceae	__Brevundimonas	__Brevundimonas naejangsanensis	1	1	NR_116722.1	NA	NA	0	0	0	0	0	0	0	0	0	0	0	0	0	0	53
denovo408	Bacteria; __Bacteroidetes; __Bacteroidia; __Bacteroidales; __Bacteroidaceae; __Bacteroides; __Bacteroides vulgatus	Bacteria	__Bacteroidetes	__Bacteroidia	__Bacteroidales	__Bacteroidaceae	__Bacteroides	__Bacteroides vulgatus	1	1	NR_074515.1	NA	NA	0	0	0	0	0	0	0	0	0	0	0	0	0	0	15
denovo409	Bacteria; __Proteobacteria; __Gammaproteobacteria; __Chromatiales; __Ectothiorhodospiraceae; __Thiohalomonas; __Thiohalomonas nitratireducens	Bacteria	__Proteobacteria	__Gammaproteobacteria	__Chromatiales	__Ectothiorhodospiraceae	__Thiohalomonas	__Thiohalomonas nitratireducens	1	1	NR_043974.1	NA	NA	0	2	3	0	0	0	0	0	4	4	3	1	2	4	0
denovo410	Bacteria; __Proteobacteria; __Alphaproteobacteria; __Rhodobacterales; __Hyphomonadaceae; __Henriciella; __Henriciella marina	Bacteria	__Proteobacteria	__Alphaproteobacteria	__Rhodobacterales	__Hyphomonadaceae	__Henriciella	__Henriciella marina	1	1	NR_044345.1	NA	NA	0	25	0	0	1	0	0	1	0	0	0	0	1	3	0
denovo411	Bacteria; __Proteobacteria; __Alphaproteobacteria; __Rhodobacterales; __Rhodobacteraceae; __Planktomarina; __Planktomarina temperata	Bacteria	__Proteobacteria	__Alphaproteobacteria	__Rhodobacterales	__Rhodobacteraceae	__Planktomarina	__Planktomarina temperata	1	1	NR_125550.1	NA	NA	3	0	0	8	7	2	10	9	1	3	0	0	1	0	0
denovo412	; __; __; __; __; __; __		__	__	__	__	__	__	1	1	NA	NA	NA	0	2	2	0	0	4	0	0	3	0	0	0	0	0	0
denovo413	Bacteria; __Actinobacteria; __Actinobacteria; __Bifidobacteriales; __Bifidobacteriaceae; __Bifidobacterium; __Bifidobacterium thermophilum	Bacteria	__Actinobacteria	__Actinobacteria	__Bifidobacteriales	__Bifidobacteriaceae	__Bifidobacterium	__Bifidobacterium thermophilum	1	1	NR_104968.1	NA	NA	0	0	0	0	0	0	0	0	0	0	0	0	0	0	39
denovo414	Bacteria; __Proteobacteria; __Gammaproteobacteria; __Chromatiales; __; __Thiohalobacter; __Thiohalobacter thiocyanaticus	Bacteria	__Proteobacteria	__Gammaproteobacteria	__Chromatiales	__	__Thiohalobacter	__Thiohalobacter thiocyanaticus	1	1	NR_116699.1	NA	NA	0	9	1	0	1	5	0	0	6	0	0	0	0	0	0
denovo415	Bacteria; __Actinobacteria; __Actinobacteria; __Corynebacteriales; __; __Lawsonella; __Lawsonella clevelandensis	Bacteria	__Actinobacteria	__Actinobacteria	__Corynebacteriales	__	__Lawsonella	__Lawsonella clevelandensis	1	1	NR_151867.1	NA	NA	1	0	0	0	0	0	0	0	0	0	0	1	0	0	15
denovo416	Bacteria; __Proteobacteria; __Betaproteobacteria; __Nitrosomonadales; __Methylophilaceae; __Methylophilus; __Methylophilus leisingeri	Bacteria	__Proteobacteria	__Betaproteobacteria	__Nitrosomonadales	__Methylophilaceae	__Methylophilus	__Methylophilus leisingeri	1	1	NR_041258.1	NA	NA	0	6	2	0	3	4	0	0	9	5	16	3	1	6	0
denovo417	Bacteria; __Proteobacteria; __Alphaproteobacteria; __Kordiimonadales; __Kordiimonadaceae; __Kordiimonas; __Kordiimonas lacus	Bacteria	__Proteobacteria	__Alphaproteobacteria	__Kordiimonadales	__Kordiimonadaceae	__Kordiimonas	__Kordiimonas lacus	1	1	NR_116840.1	NA	NA	0	2	0	0	0	0	0	0	0	0	0	0	0	3	0
denovo418	Bacteria; __Proteobacteria; __Alphaproteobacteria; __Rhizobiales; __Methylobacteriaceae; __Methylobacterium; __Methylobacterium phyllostachyos	Bacteria	__Proteobacteria	__Alphaproteobacteria	__Rhizobiales	__Methylobacteriaceae	__Methylobacterium	__Methylobacterium phyllostachyos	1	1	NR_108242.1	NA	NA	0	1	0	0	0	0	0	0	0	0	0	0	0	0	7
denovo419	Bacteria; __Actinobacteria; __Actinobacteria; __Propionibacteriales; __Nocardioidaceae; __Nocardioides; __Nocardioides salsibiostraticola	Bacteria	__Actinobacteria	__Actinobacteria	__Propionibacteriales	__Nocardioidaceae	__Nocardioides	__Nocardioides salsibiostraticola	1	1	NR_109738.1	NA	NA	0	4	0	0	1	0	0	9	0	0	2	1	4	0	0
denovo420	Bacteria; __Proteobacteria; __Gammaproteobacteria; __Chromatiales; __Granulosicoccaceae; __Granulosicoccus; __Granulosicoccus coccoides	Bacteria	__Proteobacteria	__Gammaproteobacteria	__Chromatiales	__Granulosicoccaceae	__Granulosicoccus	__Granulosicoccus coccoides	1	1	NR_104509.1	NA	NA	0	7	0	2	2	0	4	2	1	0	0	0	0	0	0
denovo421	Bacteria; __Actinobacteria; __Actinobacteria; __Corynebacteriales; __Corynebacteriaceae; __Corynebacterium; __Corynebacterium tuberculostearicum	Bacteria	__Actinobacteria	__Actinobacteria	__Corynebacteriales	__Corynebacteriaceae	__Corynebacterium	__Corynebacterium tuberculostearicum	1	1	NR_028975.1	NA	NA	0	0	0	0	0	0	0	0	0	0	0	0	0	0	86
denovo422	Bacteria; __Proteobacteria; __Alphaproteobacteria; __Pelagibacterales; __Pelagibacteraceae; __Candidatus Pelagibacter; __Candidatus Pelagibacter ubique	Bacteria	__Proteobacteria	__Alphaproteobacteria	__Pelagibacterales	__Pelagibacteraceae	__Candidatus Pelagibacter	__Candidatus Pelagibacter ubique	1	1	NR_074224.1	NA	NA	1	21	12	1	10	17	3	6	4	3	4	0	1	10	0
denovo423	Bacteria; __Firmicutes; __Negativicutes; __Veillonellales; __Veillonellaceae; __Veillonella; __Veillonella parvula	Bacteria	__Firmicutes	__Negativicutes	__Veillonellales	__Veillonellaceae	__Veillonella	__Veillonella parvula	1	1	NR_074980.1	NA	NA	0	0	0	0	0	0	0	0	0	0	0	0	0	0	19
denovo424	Bacteria; __Bacteroidetes; __Flavobacteriia; __Flavobacteriales; __Flavobacteriaceae; __Flavobacterium; __Flavobacterium frigidarium	Bacteria	__Bacteroidetes	__Flavobacteriia	__Flavobacteriales	__Flavobacteriaceae	__Flavobacterium	__Flavobacterium frigidarium	1	1	NR_117853.1	NA	NA	5	0	13	0	0	0	0	0	0	0	0	0	0	0	0
denovo425	Bacteria; __Cyanobacteria; __; __Nostocales; __Calotrichaceae; __Dulcicalothrix; __Dulcicalothrix necridiiformans	Bacteria	__Cyanobacteria	__	__Nostocales	__Calotrichaceae	__Dulcicalothrix	__Dulcicalothrix necridiiformans	1	1	NR_164867.1	NA	NA	2	0	0	2	0	0	0	0	1	24	7	17	12	0	3
denovo426	Bacteria; __Bacteroidetes; __Flavobacteriia; __Flavobacteriales; __Cryomorphaceae; __Owenweeksia; __Owenweeksia hongkongensis	Bacteria	__Bacteroidetes	__Flavobacteriia	__Flavobacteriales	__Cryomorphaceae	__Owenweeksia	__Owenweeksia hongkongensis	1	1	NR_074100.1	NA	NA	0	3	0	0	0	0	0	0	1	3	1	0	0	0	0
denovo427	Bacteria; __Proteobacteria; __Gammaproteobacteria; __Chromatiales; __; __Thiohalobacter; __Thiohalobacter thiocyanaticus	Bacteria	__Proteobacteria	__Gammaproteobacteria	__Chromatiales	__	__Thiohalobacter	__Thiohalobacter thiocyanaticus	1	1	NR_116699.1	NA	NA	0	0	8	0	0	0	0	0	1	0	4	0	7	3	0
denovo428	Bacteria; __Proteobacteria; __Alphaproteobacteria; __Caulobacterales; __Caulobacteraceae; __Phenylobacterium; __Phenylobacterium koreense	Bacteria	__Proteobacteria	__Alphaproteobacteria	__Caulobacterales	__Caulobacteraceae	__Phenylobacterium	__Phenylobacterium koreense	1	1	NR_114055.1	NA	NA	0	0	0	0	0	0	0	0	0	0	0	0	0	0	18
denovo429	Bacteria; __Proteobacteria; __Alphaproteobacteria; __Rhodobacterales; __Rhodobacteraceae; __Cognatiyoonia; __Cognatiyoonia koreensis	Bacteria	__Proteobacteria	__Alphaproteobacteria	__Rhodobacterales	__Rhodobacteraceae	__Cognatiyoonia	__Cognatiyoonia koreensis	1	1	NR_043741.1	NA	NA	4	0	21	0	0	2	0	0	0	1	0	1	1	0	0
denovo430	; __; __; __; __; __; __		__	__	__	__	__	__	1	1	NA	NA	NA	0	0	0	0	0	4	0	0	1	0	0	0	0	0	0
denovo431	Bacteria; __Actinobacteria; __Coriobacteriia; __Coriobacteriales; __Atopobiaceae; __Atopobium; __Atopobium parvulum	Bacteria	__Actinobacteria	__Coriobacteriia	__Coriobacteriales	__Atopobiaceae	__Atopobium	__Atopobium parvulum	1	1	NR_102936.1	NA	NA	0	0	0	0	0	0	0	0	0	0	0	0	0	0	8
denovo432	; __; __; __; __; __; __		__	__	__	__	__	__	1	1	NA	NA	NA	0	0	0	0	0	0	0	0	0	1	7	0	4	3	0
denovo433	Bacteria; __Cyanobacteria; __; __Synechococcales; __Chamaesiphonaceae; __Chamaesiphon; __Chamaesiphon minutus	Bacteria	__Cyanobacteria	__	__Synechococcales	__Chamaesiphonaceae	__Chamaesiphon	__Chamaesiphon minutus	1	1	NR_102459.1	NA	NA	1	0	0	0	0	0	0	0	0	3	1	41	0	0	0
denovo434	; __; __; __; __; __; __		__	__	__	__	__	__	1	1	NA	NA	NA	0	4	3	0	0	4	0	0	1	0	1	1	3	7	0
denovo435	Bacteria; __Bacteroidetes; __Flavobacteriia; __Flavobacteriales; __Flavobacteriaceae; __Polaribacter; __Polaribacter marinaquae	Bacteria	__Bacteroidetes	__Flavobacteriia	__Flavobacteriales	__Flavobacteriaceae	__Polaribacter	__Polaribacter marinaquae	1	1	NR_152672.1	NA	NA	4	0	0	0	0	0	0	0	2	2	1	0	2	0	0
denovo436	Bacteria; __Proteobacteria; __Alphaproteobacteria; __Rhizobiales; __Rhodobiaceae; __Tepidicaulis; __Tepidicaulis marinus	Bacteria	__Proteobacteria	__Alphaproteobacteria	__Rhizobiales	__Rhodobiaceae	__Tepidicaulis	__Tepidicaulis marinus	1	1	NR_135865.1	NA	NA	0	0	0	0	0	1	0	0	0	0	0	0	0	4	0
denovo437	; __; __; __; __; __; __		__	__	__	__	__	__	1	1	NA	NA	NA	0	0	0	0	0	0	0	0	0	0	0	0	1	11	0
denovo438	Bacteria; __Proteobacteria; __Alphaproteobacteria; __Rhizobiales; __Rhodobiaceae; __Parvibaculum; __Parvibaculum indicum	Bacteria	__Proteobacteria	__Alphaproteobacteria	__Rhizobiales	__Rhodobiaceae	__Parvibaculum	__Parvibaculum indicum	1	1	NR_116565.1	NA	NA	0	7	25	0	0	13	0	0	5	0	0	0	0	17	0
denovo439	Bacteria; __Bacteroidetes; __Cytophagia; __Cytophagales; __Cytophagaceae; __Aquirufa; __Aquirufa antheringensis	Bacteria	__Bacteroidetes	__Cytophagia	__Cytophagales	__Cytophagaceae	__Aquirufa	__Aquirufa antheringensis	1	1	NR_165029.1	NA	NA	0	0	0	0	0	0	0	0	0	0	0	0	0	0	30
denovo440	; __; __; __; __; __; __		__	__	__	__	__	__	1	1	NA	NA	NA	0	0	0	0	0	0	0	0	0	0	0	0	0	0	8
denovo441	Bacteria; __Proteobacteria; __Alphaproteobacteria; __Rickettsiales; __; __Lyticum; __Lyticum flagellatum	Bacteria	__Proteobacteria	__Alphaproteobacteria	__Rickettsiales	__	__Lyticum	__Lyticum flagellatum	1	1	NR_125566.1	NA	NA	0	0	2	0	0	2	0	0	5	4	0	2	2	1	0
denovo442	Bacteria; __Bacteroidetes; __Flavobacteriia; __Flavobacteriales; __Flavobacteriaceae; __Winogradskyella; __Winogradskyella ulvae	Bacteria	__Bacteroidetes	__Flavobacteriia	__Flavobacteriales	__Flavobacteriaceae	__Winogradskyella	__Winogradskyella ulvae	1	1	NR_109172.1	NA	NA	0	0	0	10	2	4	8	0	0	0	0	0	0	0	0
denovo443	Bacteria; __Proteobacteria; __Alphaproteobacteria; __Caulobacterales; __Caulobacteraceae; __Caulobacter; __Caulobacter hibisci	Bacteria	__Proteobacteria	__Alphaproteobacteria	__Caulobacterales	__Caulobacteraceae	__Caulobacter	__Caulobacter hibisci	1	1	NR_157984.1	NA	NA	6	0	0	0	0	2	22	0	3	0	0	0	0	0	26
denovo444	Bacteria; __Bacteroidetes; __Flavobacteriia; __Flavobacteriales; __Flavobacteriaceae; __Polaribacter; __Polaribacter filamentus	Bacteria	__Bacteroidetes	__Flavobacteriia	__Flavobacteriales	__Flavobacteriaceae	__Polaribacter	__Polaribacter filamentus	1	1	NR_026041.1	NA	NA	0	0	1	0	0	1	0	3	0	0	0	0	0	0	0
denovo445	Bacteria; __Proteobacteria; __Betaproteobacteria; __Burkholderiales; __Burkholderiaceae; __Paraburkholderia; __Paraburkholderia ferrariae	Bacteria	__Proteobacteria	__Betaproteobacteria	__Burkholderiales	__Burkholderiaceae	__Paraburkholderia	__Paraburkholderia ferrariae	1	1	NR_118059.1	NA	NA	0	0	0	0	0	0	0	0	0	0	0	0	0	0	41
denovo446	Bacteria; __Actinobacteria; __Acidimicrobiia; __Acidimicrobiales; __Ilumatobacteraceae; __Ilumatobacter; __Ilumatobacter fluminis	Bacteria	__Actinobacteria	__Acidimicrobiia	__Acidimicrobiales	__Ilumatobacteraceae	__Ilumatobacter	__Ilumatobacter fluminis	1	1	NR_041633.1	NA	NA	0	0	0	0	0	0	0	0	0	0	0	0	0	0	18
denovo447	Bacteria; __Bacteroidetes; __Flavobacteriia; __Flavobacteriales; __Flavobacteriaceae; __Lacinutrix; __Lacinutrix gracilariae	Bacteria	__Bacteroidetes	__Flavobacteriia	__Flavobacteriales	__Flavobacteriaceae	__Lacinutrix	__Lacinutrix gracilariae	1	1	NR_148656.1	NA	NA	0	4	2	0	0	2	0	0	12	0	0	0	0	0	0
denovo448	Bacteria; __Firmicutes; __Bacilli; __Bacillales; __Planococcaceae; __Planomicrobium; __Planomicrobium okeanokoites	Bacteria	__Firmicutes	__Bacilli	__Bacillales	__Planococcaceae	__Planomicrobium	__Planomicrobium okeanokoites	1	1	NR_113593.1	NA	NA	39	2	6	2	0	0	0	0	1	0	0	0	0	0	0
denovo449	Bacteria; __Proteobacteria; __Betaproteobacteria; __Burkholderiales; __Oxalobacteraceae; __Undibacterium; __Undibacterium terreum	Bacteria	__Proteobacteria	__Betaproteobacteria	__Burkholderiales	__Oxalobacteraceae	__Undibacterium	__Undibacterium terreum	1	1	NR_109599.1	NA	NA	0	0	0	2	0	2	0	0	1	0	0	0	0	0	0
denovo450	Bacteria; __Actinobacteria; __Acidimicrobiia; __Acidimicrobiales; __Iamiaceae; __Aquihabitans; __Aquihabitans daechungensis	Bacteria	__Actinobacteria	__Acidimicrobiia	__Acidimicrobiales	__Iamiaceae	__Aquihabitans	__Aquihabitans daechungensis	1	1	NR_132289.1	NA	NA	0	0	2	0	1	5	0	0	4	0	0	0	0	0	0
denovo451	Bacteria; __Proteobacteria; __Gammaproteobacteria; __Chromatiales; __Thioprofundaceae; __Thioprofundum; __Thioprofundum lithotrophicum	Bacteria	__Proteobacteria	__Gammaproteobacteria	__Chromatiales	__Thioprofundaceae	__Thioprofundum	__Thioprofundum lithotrophicum	1	1	NR_112829.1	NA	NA	0	2	0	0	0	3	0	0	3	0	0	0	0	0	0
denovo452	Bacteria; __Bacteroidetes; __Flavobacteriia; __Flavobacteriales; __Flavobacteriaceae; __Bizionia; __Bizionia arctica	Bacteria	__Bacteroidetes	__Flavobacteriia	__Flavobacteriales	__Flavobacteriaceae	__Bizionia	__Bizionia arctica	1	1	NR_137224.1	NA	NA	0	2	3	0	0	1	0	0	0	2	2	4	6	13	0
denovo453	Bacteria; __Bacteroidetes; __Flavobacteriia; __Flavobacteriales; __Flavobacteriaceae; __Chryseobacterium; __Chryseobacterium hominis	Bacteria	__Bacteroidetes	__Flavobacteriia	__Flavobacteriales	__Flavobacteriaceae	__Chryseobacterium	__Chryseobacterium hominis	1	1	NR_042517.2	NA	NA	0	0	0	0	0	0	0	0	0	0	0	0	0	0	15
denovo454	; __; __; __; __; __; __		__	__	__	__	__	__	1	1	NA	NA	NA	0	0	1	0	11	1	0	5	1	0	0	0	1	1	0
denovo455	Bacteria; __Proteobacteria; __Alphaproteobacteria; __Rickettsiales; __Rickettsiaceae; __Rickettsia; __Rickettsia sibirica	Bacteria	__Proteobacteria	__Alphaproteobacteria	__Rickettsiales	__Rickettsiaceae	__Rickettsia	__Rickettsia sibirica	1	1	NR_036848.1	NA	NA	0	0	0	1	2	1	0	0	0	4	0	0	0	0	0
denovo456	Bacteria; __Cyanobacteria; __; __Pleurocapsales; __Dermocarpellaceae; __Stanieria; __Stanieria cyanosphaera	Bacteria	__Cyanobacteria	__	__Pleurocapsales	__Dermocarpellaceae	__Stanieria	__Stanieria cyanosphaera	1	1	NR_102468.1	NA	NA	0	0	0	0	0	0	0	0	0	2	3	0	0	0	0
denovo457	; __; __; __; __; __; __		__	__	__	__	__	__	1	1	NA	NA	NA	0	0	1	0	0	0	0	0	0	0	0	0	1	9	0
denovo458	Bacteria; __Proteobacteria; __Alphaproteobacteria; __Rhodospirillales; __Rhodospirillaceae; __Haematospirillum; __Haematospirillum jordaniae	Bacteria	__Proteobacteria	__Alphaproteobacteria	__Rhodospirillales	__Rhodospirillaceae	__Haematospirillum	__Haematospirillum jordaniae	1	1	NR_145528.1	NA	NA	0	5	3	0	0	3	0	0	0	0	0	0	0	19	0
denovo459	Bacteria; __Cyanobacteria; __; __Nostocales; __Calotrichaceae; __Dulcicalothrix; __Dulcicalothrix necridiiformans	Bacteria	__Cyanobacteria	__	__Nostocales	__Calotrichaceae	__Dulcicalothrix	__Dulcicalothrix necridiiformans	1	1	NR_164867.1	NA	NA	0	0	0	0	0	0	0	0	0	0	5	2	7	12	0
denovo460	Bacteria; __Deinococcus-Thermus; __Deinococci; __Deinococcales; __Deinococcaceae; __Deinococcus; __Deinococcus xinjiangensis	Bacteria	__Deinococcus-Thermus	__Deinococci	__Deinococcales	__Deinococcaceae	__Deinococcus	__Deinococcus xinjiangensis	1	1	NR_044542.1	NA	NA	0	0	0	0	0	0	0	0	0	0	0	0	0	0	5
denovo461	Bacteria; __Proteobacteria; __Deltaproteobacteria; __Desulfovibrionales; __Desulfovibrionaceae; __Desulfovibrio; __Desulfovibrio butyratiphilus	Bacteria	__Proteobacteria	__Deltaproteobacteria	__Desulfovibrionales	__Desulfovibrionaceae	__Desulfovibrio	__Desulfovibrio butyratiphilus	1	1	NR_112678.1	NA	NA	0	0	5	0	0	7	0	0	3	0	0	0	0	0	0
denovo462	Bacteria; __Proteobacteria; __Alphaproteobacteria; __Rhodospirillales; __Acetobacteraceae; __Roseomonas; __Roseomonas aerilata	Bacteria	__Proteobacteria	__Alphaproteobacteria	__Rhodospirillales	__Acetobacteraceae	__Roseomonas	__Roseomonas aerilata	1	1	NR_044347.1	NA	NA	0	0	0	0	0	0	0	0	0	0	0	0	0	0	11
denovo463	; __; __; __; __; __; __		__	__	__	__	__	__	1	1	NA	NA	NA	0	0	0	0	0	0	0	0	0	18	1	5	6	4	0
denovo464	; __; __; __; __; __; __		__	__	__	__	__	__	1	1	NA	NA	NA	0	0	0	0	0	0	0	0	0	0	0	0	0	0	5
denovo465	Bacteria; __Proteobacteria; __Gammaproteobacteria; __Cellvibrionales; __Cellvibrionaceae; __Eionea; __Eionea flava	Bacteria	__Proteobacteria	__Gammaproteobacteria	__Cellvibrionales	__Cellvibrionaceae	__Eionea	__Eionea flava	1	1	NR_137230.1	NA	NA	0	0	0	0	2	3	0	1	2	0	0	0	0	0	0
denovo466	Bacteria; __Actinobacteria; __Actinobacteria; __Micrococcales; __Micrococcaceae; __Rothia; __Rothia mucilaginosa	Bacteria	__Actinobacteria	__Actinobacteria	__Micrococcales	__Micrococcaceae	__Rothia	__Rothia mucilaginosa	1	1	NR_044873.1	NA	NA	0	0	0	0	0	0	0	0	0	0	0	0	0	0	25
denovo467	Bacteria; __Proteobacteria; __Deltaproteobacteria; __Desulfovibrionales; __Desulfovibrionaceae; __Desulfovibrio; __Desulfovibrio alaskensis	Bacteria	__Proteobacteria	__Deltaproteobacteria	__Desulfovibrionales	__Desulfovibrionaceae	__Desulfovibrio	__Desulfovibrio alaskensis	1	1	NR_029338.2	NA	NA	0	4	14	0	0	11	0	4	12	1	0	0	1	0	0
denovo468	; __; __; __; __; __; __		__	__	__	__	__	__	1	1	NA	NA	NA	0	0	10	0	1	9	0	0	6	0	0	0	1	7	0
denovo469	Bacteria; __Bacteroidetes; __Flavobacteriia; __Flavobacteriales; __Cryomorphaceae; __Vicingus; __Vicingus serpentipes	Bacteria	__Bacteroidetes	__Flavobacteriia	__Flavobacteriales	__Cryomorphaceae	__Vicingus	__Vicingus serpentipes	1	1	NR_159281.1	NA	NA	1	0	5	0	0	8	0	0	15	0	0	0	0	1	0
denovo470	; __; __; __; __; __; __		__	__	__	__	__	__	1	1	NA	NA	NA	0	0	0	0	0	3	0	0	0	0	0	0	0	9	0
denovo471	; __; __; __; __; __; __		__	__	__	__	__	__	1	1	NA	NA	NA	0	0	10	0	0	5	0	0	0	0	0	0	0	7	0
denovo472	Bacteria; __Proteobacteria; __Gammaproteobacteria; __Cellvibrionales; __Cellvibrionaceae; __Teredinibacter; __Teredinibacter turnerae	Bacteria	__Proteobacteria	__Gammaproteobacteria	__Cellvibrionales	__Cellvibrionaceae	__Teredinibacter	__Teredinibacter turnerae	1	1	NR_027564.1	NA	NA	0	0	0	2	2	1	3	0	1	0	0	0	0	0	0
denovo473	Bacteria; __Proteobacteria; __Alphaproteobacteria; __Sphingomonadales; __Erythrobacteraceae; __Erythrobacter; __Erythrobacter longus	Bacteria	__Proteobacteria	__Alphaproteobacteria	__Sphingomonadales	__Erythrobacteraceae	__Erythrobacter	__Erythrobacter longus	1	1	NR_041889.1	NA	NA	0	9	3	0	0	4	0	0	4	0	0	0	1	4	0
denovo474	Bacteria; __Bacteroidetes; __Bacteroidia; __Bacteroidales; __Porphyromonadaceae; __Porphyromonas; __Porphyromonas endodontalis	Bacteria	__Bacteroidetes	__Bacteroidia	__Bacteroidales	__Porphyromonadaceae	__Porphyromonas	__Porphyromonas endodontalis	1	1	NR_113085.1	NA	NA	0	0	0	0	0	0	0	0	0	0	0	0	0	0	17
denovo475	Bacteria; __Proteobacteria; __Gammaproteobacteria; __Pseudomonadales; __Pseudomonadaceae; __Pseudomonas; __Pseudomonas litoralis	Bacteria	__Proteobacteria	__Gammaproteobacteria	__Pseudomonadales	__Pseudomonadaceae	__Pseudomonas	__Pseudomonas litoralis	1	1	NR_108487.1	NA	NA	0	0	0	0	0	0	0	0	0	0	0	0	0	0	5
denovo476	Bacteria; __Proteobacteria; __Betaproteobacteria; __Nitrosomonadales; __Nitrosomonadaceae; __Nitrosospira; __Nitrosospira multiformis	Bacteria	__Proteobacteria	__Betaproteobacteria	__Nitrosomonadales	__Nitrosomonadaceae	__Nitrosospira	__Nitrosospira multiformis	1	1	NR_074736.1	NA	NA	0	0	0	0	0	0	0	0	0	0	0	0	0	0	5
denovo477	Bacteria; __Firmicutes; __Bacilli; __Lactobacillales; __Leuconostocaceae; __Leuconostoc; __Leuconostoc lactis	Bacteria	__Firmicutes	__Bacilli	__Lactobacillales	__Leuconostocaceae	__Leuconostoc	__Leuconostoc lactis	1	1	NR_113255.1	NA	NA	0	0	0	0	0	0	0	0	0	0	0	0	0	0	24
denovo478	Bacteria; __Proteobacteria; __Alphaproteobacteria; __Rickettsiales; __Rickettsiaceae; __Orientia; __Orientia tsutsugamushi	Bacteria	__Proteobacteria	__Alphaproteobacteria	__Rickettsiales	__Rickettsiaceae	__Orientia	__Orientia tsutsugamushi	1	1	NR_025860.1	NA	NA	0	0	0	0	1	4	0	0	0	0	0	0	0	0	0
denovo479	Bacteria; __Proteobacteria; __Deltaproteobacteria; __Desulfuromonadales; __Geobacteraceae; __Geobacter; __Geobacter metallireducens	Bacteria	__Proteobacteria	__Deltaproteobacteria	__Desulfuromonadales	__Geobacteraceae	__Geobacter	__Geobacter metallireducens	1	1	NR_075011.1	NA	NA	0	0	3	0	2	7	0	0	8	0	7	1	3	22	0
denovo480	Bacteria; __Actinobacteria; __Actinobacteria; __Geodermatophilales; __Geodermatophilaceae; __Modestobacter; __Modestobacter caceresii	Bacteria	__Actinobacteria	__Actinobacteria	__Geodermatophilales	__Geodermatophilaceae	__Modestobacter	__Modestobacter caceresii	1	1	NR_137398.1	NA	NA	0	0	5	0	0	0	0	0	0	0	0	0	0	0	0
denovo481	Bacteria; __Proteobacteria; __Gammaproteobacteria; __Chromatiales; __Thioprofundaceae; __Thioprofundum; __Thioprofundum lithotrophicum	Bacteria	__Proteobacteria	__Gammaproteobacteria	__Chromatiales	__Thioprofundaceae	__Thioprofundum	__Thioprofundum lithotrophicum	1	1	NR_112829.1	NA	NA	0	6	7	0	0	4	0	0	2	0	0	0	0	0	0
denovo482	Bacteria; __Proteobacteria; __Alphaproteobacteria; __Rhodospirillales; __Rhodospirillaceae; __Rhodospirillum; __Rhodospirillum centenum	Bacteria	__Proteobacteria	__Alphaproteobacteria	__Rhodospirillales	__Rhodospirillaceae	__Rhodospirillum	__Rhodospirillum centenum	1	1	NR_025830.1	NA	NA	0	0	0	0	0	0	0	0	0	0	0	0	0	0	5
denovo483	Bacteria; __Proteobacteria; __Alphaproteobacteria; __Rhizobiales; __Rhodobiaceae; __Butyratibacter; __Butyratibacter algicola	Bacteria	__Proteobacteria	__Alphaproteobacteria	__Rhizobiales	__Rhodobiaceae	__Butyratibacter	__Butyratibacter algicola	1	1	NR_157992.1	NA	NA	0	7	4	0	0	3	0	0	4	0	0	0	0	3	0
denovo484	Bacteria; __Fusobacteria; __Fusobacteriia; __Fusobacteriales; __Leptotrichiaceae; __Sneathia; __Sneathia sanguinegens	Bacteria	__Fusobacteria	__Fusobacteriia	__Fusobacteriales	__Leptotrichiaceae	__Sneathia	__Sneathia sanguinegens	1	1	NR_118342.1	NA	NA	0	0	0	0	0	0	0	0	0	0	0	0	0	0	11
denovo485	Bacteria; __Proteobacteria; __Gammaproteobacteria; __; __; __Pseudohongiella; __Pseudohongiella nitratireducens	Bacteria	__Proteobacteria	__Gammaproteobacteria	__	__	__Pseudohongiella	__Pseudohongiella nitratireducens	1	1	NR_153732.1	NA	NA	0	2	1	0	0	2	0	0	0	0	0	0	0	0	0
denovo486	Bacteria; __Firmicutes; __Clostridia; __Clostridiales; __Ruminococcaceae; __Gemmiger; __Gemmiger formicilis	Bacteria	__Firmicutes	__Clostridia	__Clostridiales	__Ruminococcaceae	__Gemmiger	__Gemmiger formicilis	1	1	NR_104846.1	NA	NA	0	0	0	0	0	0	0	0	0	0	0	0	0	0	10
denovo487	Bacteria; __Proteobacteria; __Alphaproteobacteria; __Rhodobacterales; __Rhodobacteraceae; __Antarctobacter; __Antarctobacter jejuensis	Bacteria	__Proteobacteria	__Alphaproteobacteria	__Rhodobacterales	__Rhodobacteraceae	__Antarctobacter	__Antarctobacter jejuensis	1	1	NR_148278.1	NA	NA	0	0	1	0	0	0	0	0	0	1	0	0	13	1	0
denovo488	Bacteria; __Proteobacteria; __Gammaproteobacteria; __Alteromonadales; __Alteromonadaceae; __Paraglaciecola; __Paraglaciecola arctica	Bacteria	__Proteobacteria	__Gammaproteobacteria	__Alteromonadales	__Alteromonadaceae	__Paraglaciecola	__Paraglaciecola arctica	1	1	NR_116288.1	NA	NA	0	0	2	3	2	0	1	1	1	0	0	0	0	0	0
denovo489	Bacteria; __Proteobacteria; __Oligoflexia; __Bacteriovoracales; __Halobacteriovoraceae; __Halobacteriovorax; __Halobacteriovorax marinus	Bacteria	__Proteobacteria	__Oligoflexia	__Bacteriovoracales	__Halobacteriovoraceae	__Halobacteriovorax	__Halobacteriovorax marinus	1	1	NR_102485.1	NA	NA	0	0	0	0	0	0	0	0	0	0	2	0	3	2	0
denovo490	Bacteria; __Firmicutes; __Tissierellia; __Tissierellales; __Peptoniphilaceae; __Anaerococcus; __Anaerococcus nagyae	Bacteria	__Firmicutes	__Tissierellia	__Tissierellales	__Peptoniphilaceae	__Anaerococcus	__Anaerococcus nagyae	1	1	NR_146835.1	NA	NA	0	0	0	0	0	0	0	0	0	0	0	0	0	0	32
denovo491	; __; __; __; __; __; __		__	__	__	__	__	__	1	1	NA	NA	NA	0	0	0	0	0	0	0	0	0	3	6	7	4	4	0
denovo492	; __; __; __; __; __; __		__	__	__	__	__	__	1	1	NA	NA	NA	0	0	0	0	0	0	0	0	0	0	0	2	1	16	0
denovo493	Bacteria; __Proteobacteria; __Epsilonproteobacteria; __Campylobacterales; __Campylobacteraceae; __Arcobacter; __Arcobacter cryaerophilus	Bacteria	__Proteobacteria	__Epsilonproteobacteria	__Campylobacterales	__Campylobacteraceae	__Arcobacter	__Arcobacter cryaerophilus	1	1	NR_025905.1	NA	NA	0	4	0	0	5	2	0	0	0	0	0	0	0	0	0
denovo494	Bacteria; __Proteobacteria; __Gammaproteobacteria; __Chromatiales; __Thioprofundaceae; __Thioprofundum; __Thioprofundum lithotrophicum	Bacteria	__Proteobacteria	__Gammaproteobacteria	__Chromatiales	__Thioprofundaceae	__Thioprofundum	__Thioprofundum lithotrophicum	1	1	NR_112829.1	NA	NA	0	0	2	0	0	3	0	0	15	0	0	0	0	2	0
denovo495	; __; __; __; __; __; __		__	__	__	__	__	__	1	1	NA	NA	NA	0	0	0	0	0	0	0	0	0	0	0	0	0	0	23
denovo496	Bacteria; __Proteobacteria; __Gammaproteobacteria; __Alteromonadales; __Pseudoalteromonadaceae; __Pseudoalteromonas; __Pseudoalteromonas neustonica	Bacteria	__Proteobacteria	__Gammaproteobacteria	__Alteromonadales	__Pseudoalteromonadaceae	__Pseudoalteromonas	__Pseudoalteromonas neustonica	1	1	NR_151996.1	NA	NA	0	0	4	0	0	0	0	0	0	0	0	3	3	7	0
denovo497	Bacteria; __Proteobacteria; __Alphaproteobacteria; __Rhodobacterales; __Rhodobacteraceae; __Paracoccus; __Paracoccus acridae	Bacteria	__Proteobacteria	__Alphaproteobacteria	__Rhodobacterales	__Rhodobacteraceae	__Paracoccus	__Paracoccus acridae	1	1	NR_151998.1	NA	NA	0	0	0	0	0	0	0	0	0	0	0	0	0	0	17
denovo498	Bacteria; __Bacteroidetes; __Flavobacteriia; __Flavobacteriales; __Cryomorphaceae; __Owenweeksia; __Owenweeksia hongkongensis	Bacteria	__Bacteroidetes	__Flavobacteriia	__Flavobacteriales	__Cryomorphaceae	__Owenweeksia	__Owenweeksia hongkongensis	1	1	NR_074100.1	NA	NA	0	0	5	0	0	10	0	0	3	0	0	0	0	7	0
denovo499	Bacteria; __Cyanobacteria; __; __Synechococcales; __Prochloraceae; __Prochlorococcus; __Prochlorococcus marinus	Bacteria	__Cyanobacteria	__	__Synechococcales	__Prochloraceae	__Prochlorococcus	__Prochlorococcus marinus	1	1	NR_125480.1	NA	NA	0	0	0	0	0	0	0	0	0	0	4	0	0	0	0
denovo500	Bacteria; __Cyanobacteria; __; __Pleurocapsales; __Dermocarpellaceae; __Stanieria; __Stanieria cyanosphaera	Bacteria	__Cyanobacteria	__	__Pleurocapsales	__Dermocarpellaceae	__Stanieria	__Stanieria cyanosphaera	1	1	NR_102468.1	NA	NA	0	0	17	1	31	16	0	1	4	0	0	0	0	0	0
denovo501	Bacteria; __Proteobacteria; __Alphaproteobacteria; __Pelagibacterales; __Pelagibacteraceae; __Candidatus Pelagibacter; __Candidatus Pelagibacter ubique	Bacteria	__Proteobacteria	__Alphaproteobacteria	__Pelagibacterales	__Pelagibacteraceae	__Candidatus Pelagibacter	__Candidatus Pelagibacter ubique	1	1	NR_074224.1	NA	NA	0	0	0	0	0	4	0	0	0	0	0	0	0	0	0
denovo502	Bacteria; __Bacteroidetes; __Bacteroidia; __Bacteroidales; __Prevotellaceae; __Prevotella; __Prevotella denticola	Bacteria	__Bacteroidetes	__Bacteroidia	__Bacteroidales	__Prevotellaceae	__Prevotella	__Prevotella denticola	1	1	NR_042842.1	NA	NA	0	0	0	0	0	0	0	0	0	0	0	0	0	0	10
denovo503	Bacteria; __Proteobacteria; __Gammaproteobacteria; __Cellvibrionales; __Cellvibrionaceae; __Eionea; __Eionea flava	Bacteria	__Proteobacteria	__Gammaproteobacteria	__Cellvibrionales	__Cellvibrionaceae	__Eionea	__Eionea flava	1	1	NR_137230.1	NA	NA	0	0	0	0	0	0	0	7	0	0	0	0	0	0	0
denovo504	Bacteria; __Actinobacteria; __Acidimicrobiia; __Acidimicrobiales; __Acidimicrobiaceae; __Aciditerrimonas; __Aciditerrimonas ferrireducens	Bacteria	__Actinobacteria	__Acidimicrobiia	__Acidimicrobiales	__Acidimicrobiaceae	__Aciditerrimonas	__Aciditerrimonas ferrireducens	1	1	NR_112972.1	NA	NA	0	6	1	0	0	3	0	0	0	0	0	0	0	10	0
denovo505	Bacteria; __Firmicutes; __Erysipelotrichia; __Erysipelotrichales; __Erysipelotrichaceae; __Bulleidia; __Bulleidia extructa	Bacteria	__Firmicutes	__Erysipelotrichia	__Erysipelotrichales	__Erysipelotrichaceae	__Bulleidia	__Bulleidia extructa	1	1	NR_028773.1	NA	NA	0	0	0	0	0	0	0	0	0	0	0	0	0	0	14
denovo506	Bacteria; __Proteobacteria; __Alphaproteobacteria; __Sphingomonadales; __Sphingomonadaceae; __Sphingopyxis; __Sphingopyxis fribergensis	Bacteria	__Proteobacteria	__Alphaproteobacteria	__Sphingomonadales	__Sphingomonadaceae	__Sphingopyxis	__Sphingopyxis fribergensis	1	1	NR_137271.1	NA	NA	0	0	0	0	0	0	0	0	0	0	0	0	0	0	36
denovo507	; __; __; __; __; __; __		__	__	__	__	__	__	1	1	NA	NA	NA	0	0	2	0	0	1	0	0	0	0	0	0	0	14	0
denovo508	; __; __; __; __; __; __		__	__	__	__	__	__	1	1	NA	NA	NA	0	0	0	0	0	0	0	0	0	0	0	0	0	0	4
denovo509	Bacteria; __Firmicutes; __Bacilli; __Bacillales; __Bacillaceae; __Lysinibacillus; __Lysinibacillus chungkukjangi	Bacteria	__Firmicutes	__Bacilli	__Bacillales	__Bacillaceae	__Lysinibacillus	__Lysinibacillus chungkukjangi	1	1	NR_109669.1	NA	NA	0	0	0	0	0	0	0	0	0	0	0	0	0	0	14
denovo510	; __; __; __; __; __; __		__	__	__	__	__	__	1	1	NA	NA	NA	2	0	2	0	0	5	2	4	4	7	1	5	0	5	0
denovo511	Bacteria; __Bacteroidetes; __Bacteroidia; __Bacteroidales; __Bacteroidaceae; __Bacteroides; __Bacteroides ovatus	Bacteria	__Bacteroidetes	__Bacteroidia	__Bacteroidales	__Bacteroidaceae	__Bacteroides	__Bacteroides ovatus	1	1	NR_112940.1	NA	NA	0	0	0	0	0	0	0	0	0	0	0	0	0	0	20
denovo512	Bacteria; __Bacteroidetes; __Cytophagia; __Cytophagales; __Hymenobacteraceae; __Siccationidurans; __Siccationidurans soli	Bacteria	__Bacteroidetes	__Cytophagia	__Cytophagales	__Hymenobacteraceae	__Siccationidurans	__Siccationidurans soli	1	1	NR_041437.1	NA	NA	0	0	0	0	0	0	0	0	0	0	0	0	0	0	13
denovo513	Bacteria; __Proteobacteria; __Gammaproteobacteria; __Pseudomonadales; __Moraxellaceae; __Acinetobacter; __Acinetobacter seohaensis	Bacteria	__Proteobacteria	__Gammaproteobacteria	__Pseudomonadales	__Moraxellaceae	__Acinetobacter	__Acinetobacter seohaensis	1	1	NR_115299.1	NA	NA	0	0	0	0	0	0	0	0	0	0	0	0	0	0	4
denovo514	Bacteria; __Bacteroidetes; __Flavobacteriia; __Flavobacteriales; __Flavobacteriaceae; __Flavicella; __Flavicella marina	Bacteria	__Bacteroidetes	__Flavobacteriia	__Flavobacteriales	__Flavobacteriaceae	__Flavicella	__Flavicella marina	1	1	NR_134724.1	NA	NA	0	0	0	0	0	0	2	21	0	0	0	0	0	3	0
denovo515	Bacteria; __Proteobacteria; __Betaproteobacteria; __Burkholderiales; __Comamonadaceae; __Limnohabitans; __Limnohabitans parvus	Bacteria	__Proteobacteria	__Betaproteobacteria	__Burkholderiales	__Comamonadaceae	__Limnohabitans	__Limnohabitans parvus	1	1	NR_125542.1	NA	NA	0	0	0	0	0	0	0	0	0	0	0	0	0	0	17
denovo516	Bacteria; __Proteobacteria; __Alphaproteobacteria; __Rhodospirillales; __Acetobacteraceae; __Acidocella; __Acidocella aluminiidurans	Bacteria	__Proteobacteria	__Alphaproteobacteria	__Rhodospirillales	__Acetobacteraceae	__Acidocella	__Acidocella aluminiidurans	1	1	NR_114266.1	NA	NA	0	0	0	0	0	0	0	0	0	0	0	0	0	0	16
denovo517	Bacteria; __Verrucomicrobia; __Verrucomicrobiae; __Verrucomicrobiales; __Rubritaleaceae; __Rubritalea; __Rubritalea marina	Bacteria	__Verrucomicrobia	__Verrucomicrobiae	__Verrucomicrobiales	__Rubritaleaceae	__Rubritalea	__Rubritalea marina	1	1	NR_043701.1	NA	NA	0	0	10	0	1	2	0	0	4	0	0	0	0	0	0
denovo518	Bacteria; __Firmicutes; __Bacilli; __Lactobacillales; __Streptococcaceae; __Streptococcus; __Streptococcus anginosus	Bacteria	__Firmicutes	__Bacilli	__Lactobacillales	__Streptococcaceae	__Streptococcus	__Streptococcus anginosus	1	1	NR_118289.1	NA	NA	0	0	0	0	0	0	0	0	0	0	0	0	0	0	10
denovo519	Bacteria; __Proteobacteria; __Alphaproteobacteria; __Rhizobiales; __Hyphomicrobiaceae; __Hyphomicrobium; __Hyphomicrobium aestuarii	Bacteria	__Proteobacteria	__Alphaproteobacteria	__Rhizobiales	__Hyphomicrobiaceae	__Hyphomicrobium	__Hyphomicrobium aestuarii	1	1	NR_104954.1	NA	NA	0	0	0	0	0	0	0	0	0	0	0	0	0	0	7
denovo520	Bacteria; __Proteobacteria; __Alphaproteobacteria; __Rhodospirillales; __Rhodospirillaceae; __Insolitispirillum; __Insolitispirillum peregrinum	Bacteria	__Proteobacteria	__Alphaproteobacteria	__Rhodospirillales	__Rhodospirillaceae	__Insolitispirillum	__Insolitispirillum peregrinum	1	1	NR_113698.1	NA	NA	0	0	6	0	0	1	0	0	0	0	0	0	0	0	0
denovo521	Bacteria; __Proteobacteria; __Gammaproteobacteria; __Alteromonadales; __Colwelliaceae; __Colwellia; __Colwellia psychrerythraea	Bacteria	__Proteobacteria	__Gammaproteobacteria	__Alteromonadales	__Colwelliaceae	__Colwellia	__Colwellia psychrerythraea	1	1	NR_037047.1	NA	NA	0	0	7	0	0	8	0	0	8	0	1	0	0	0	0
denovo522	Bacteria; __Actinobacteria; __Actinobacteria; __Propionibacteriales; __Nocardioidaceae; __Aeromicrobium; __Aeromicrobium ponti	Bacteria	__Actinobacteria	__Actinobacteria	__Propionibacteriales	__Nocardioidaceae	__Aeromicrobium	__Aeromicrobium ponti	1	1	NR_042659.1	NA	NA	0	3	0	0	0	0	0	3	0	0	0	0	1	0	0
denovo523	Bacteria; __Bacteroidetes; __Saprospiria; __Saprospirales; __Lewinellaceae; __Lewinella; __Lewinella agarilytica	Bacteria	__Bacteroidetes	__Saprospiria	__Saprospirales	__Lewinellaceae	__Lewinella	__Lewinella agarilytica	1	1	NR_042534.1	NA	NA	2	0	0	10	1	0	10	1	0	0	0	0	0	0	0
denovo524	Bacteria; __Proteobacteria; __Gammaproteobacteria; __Cellvibrionales; __Spongiibacteraceae; __Oceanicoccus; __Oceanicoccus sagamiensis	Bacteria	__Proteobacteria	__Gammaproteobacteria	__Cellvibrionales	__Spongiibacteraceae	__Oceanicoccus	__Oceanicoccus sagamiensis	1	1	NR_113054.1	NA	NA	0	0	0	0	0	0	0	0	0	0	2	1	10	7	0
denovo525	Bacteria; __Proteobacteria; __Alphaproteobacteria; __Rhizobiales; __Rhodobiaceae; __Pyruvatibacter; __Pyruvatibacter mobilis	Bacteria	__Proteobacteria	__Alphaproteobacteria	__Rhizobiales	__Rhodobiaceae	__Pyruvatibacter	__Pyruvatibacter mobilis	1	1	NR_147733.1	NA	NA	0	0	0	0	0	1	0	0	1	0	4	0	4	0	0
denovo526	; __; __; __; __; __; __		__	__	__	__	__	__	1	1	NA	NA	NA	0	0	0	0	0	0	0	0	0	4	0	0	0	3	0
denovo527	Bacteria; __Bacteroidetes; __Chitinophagia; __Chitinophagales; __Chitinophagaceae; __Sediminibacterium; __Sediminibacterium roseum	Bacteria	__Bacteroidetes	__Chitinophagia	__Chitinophagales	__Chitinophagaceae	__Sediminibacterium	__Sediminibacterium roseum	1	1	NR_159130.1	NA	NA	0	0	0	0	0	0	0	0	0	0	0	0	0	0	13
denovo528	Bacteria; __Proteobacteria; __Alphaproteobacteria; __Iodidimonadales; __Iodidimonadaceae; __Iodidimonas; __Iodidimonas muriae	Bacteria	__Proteobacteria	__Alphaproteobacteria	__Iodidimonadales	__Iodidimonadaceae	__Iodidimonas	__Iodidimonas muriae	1	1	NR_153725.1	NA	NA	0	0	0	0	0	0	0	0	0	0	0	0	0	7	0
denovo529	Bacteria; __Firmicutes; __Bacilli; __Bacillales; __Staphylococcaceae; __Salinicoccus; __Salinicoccus hispanicus	Bacteria	__Firmicutes	__Bacilli	__Bacillales	__Staphylococcaceae	__Salinicoccus	__Salinicoccus hispanicus	1	1	NR_025645.1	NA	NA	0	0	0	0	0	0	0	0	0	0	0	0	0	0	4
denovo530	Bacteria; __Bacteroidetes; __Flavobacteriia; __Flavobacteriales; __Cryomorphaceae; __Vicingus; __Vicingus serpentipes	Bacteria	__Bacteroidetes	__Flavobacteriia	__Flavobacteriales	__Cryomorphaceae	__Vicingus	__Vicingus serpentipes	1	1	NR_159281.1	NA	NA	0	0	4	0	0	2	0	0	1	0	0	0	0	0	0
denovo531	Bacteria; __Bacteroidetes; __Bacteroidia; __Bacteroidales; __Bacteroidaceae; __Bacteroides; __Bacteroides fragilis	Bacteria	__Bacteroidetes	__Bacteroidia	__Bacteroidales	__Bacteroidaceae	__Bacteroides	__Bacteroides fragilis	1	1	NR_074784.2	NA	NA	0	0	0	0	0	0	0	0	0	0	0	0	0	0	7
denovo532	Bacteria; __Bacteroidetes; __Saprospiria; __Saprospirales; __Saprospiraceae; __Aureispira; __Aureispira maritima	Bacteria	__Bacteroidetes	__Saprospiria	__Saprospirales	__Saprospiraceae	__Aureispira	__Aureispira maritima	1	1	NR_041537.1	NA	NA	0	0	4	0	0	1	0	0	2	0	0	0	0	0	0
denovo533	Bacteria; __Firmicutes; __Negativicutes; __Veillonellales; __Veillonellaceae; __Dialister; __Dialister succinatiphilus	Bacteria	__Firmicutes	__Negativicutes	__Veillonellales	__Veillonellaceae	__Dialister	__Dialister succinatiphilus	1	1	NR_041666.1	NA	NA	0	0	0	0	0	0	0	0	0	0	0	0	0	0	19
denovo534	Bacteria; __Bacteroidetes; __Flavobacteriia; __Flavobacteriales; __Crocinitomicaceae; __Fluviicola; __Fluviicola taffensis	Bacteria	__Bacteroidetes	__Flavobacteriia	__Flavobacteriales	__Crocinitomicaceae	__Fluviicola	__Fluviicola taffensis	1	1	NR_074547.1	NA	NA	0	0	4	0	0	5	0	0	0	1	0	1	1	5	0
denovo535	Bacteria; __Proteobacteria; __Oligoflexia; __Oligoflexales; __Oligoflexaceae; __Oligoflexus; __Oligoflexus tunisiensis	Bacteria	__Proteobacteria	__Oligoflexia	__Oligoflexales	__Oligoflexaceae	__Oligoflexus	__Oligoflexus tunisiensis	1	1	NR_134109.1	NA	NA	0	0	0	0	0	0	0	0	0	2	0	0	4	15	0
denovo536	Bacteria; __Proteobacteria; __Gammaproteobacteria; __Oceanospirillales; __Saccharospirillaceae; __Reinekea; __Reinekea marina	Bacteria	__Proteobacteria	__Gammaproteobacteria	__Oceanospirillales	__Saccharospirillaceae	__Reinekea	__Reinekea marina	1	1	NR_147763.1	NA	NA	3	0	0	3	0	0	4	0	0	0	0	0	0	0	0
denovo537	Bacteria; __Proteobacteria; __Gammaproteobacteria; __Chromatiales; __Woeseiaceae; __Woeseia; __Woeseia oceani	Bacteria	__Proteobacteria	__Gammaproteobacteria	__Chromatiales	__Woeseiaceae	__Woeseia	__Woeseia oceani	1	1	NR_147719.1	NA	NA	0	5	0	0	0	6	0	0	2	0	0	0	0	0	0
denovo538	Bacteria; __Proteobacteria; __Gammaproteobacteria; __Enterobacterales; __Enterobacteriaceae; __Escherichia; __Escherichia fergusonii	Bacteria	__Proteobacteria	__Gammaproteobacteria	__Enterobacterales	__Enterobacteriaceae	__Escherichia	__Escherichia fergusonii	1	1	NR_074902.1	NA	NA	0	0	0	0	0	0	0	0	0	0	0	0	0	0	4
denovo539	Bacteria; __Proteobacteria; __Gammaproteobacteria; __Pseudomonadales; __Pseudomonadaceae; __Pseudomonas; __Pseudomonas marincola	Bacteria	__Proteobacteria	__Gammaproteobacteria	__Pseudomonadales	__Pseudomonadaceae	__Pseudomonas	__Pseudomonas marincola	1	1	NR_041592.1	NA	NA	0	3	1	0	0	0	0	0	0	0	0	0	0	0	0
denovo540	Bacteria; __Bacteroidetes; __Flavobacteriia; __Flavobacteriales; __Flavobacteriaceae; __Gilvibacter; __Gilvibacter sediminis	Bacteria	__Bacteroidetes	__Flavobacteriia	__Flavobacteriales	__Flavobacteriaceae	__Gilvibacter	__Gilvibacter sediminis	1	1	NR_114011.1	NA	NA	0	2	0	0	0	0	0	0	0	0	2	0	0	0	0
denovo541	Bacteria; __Actinobacteria; __Actinobacteria; __Micrococcales; __Brevibacteriaceae; __Brevibacterium; __Brevibacterium pityocampae	Bacteria	__Actinobacteria	__Actinobacteria	__Micrococcales	__Brevibacteriaceae	__Brevibacterium	__Brevibacterium pityocampae	1	1	NR_116332.1	NA	NA	0	0	0	0	0	0	0	0	0	0	0	0	0	0	20
denovo542	Bacteria; __Bacteroidetes; __Flavobacteriia; __Flavobacteriales; __Cryomorphaceae; __Owenweeksia; __Owenweeksia hongkongensis	Bacteria	__Bacteroidetes	__Flavobacteriia	__Flavobacteriales	__Cryomorphaceae	__Owenweeksia	__Owenweeksia hongkongensis	1	1	NR_074100.1	NA	NA	0	0	0	2	0	0	1	1	0	0	0	0	0	0	0
denovo543	Bacteria; __Proteobacteria; __Alphaproteobacteria; __Kordiimonadales; __Kordiimonadaceae; __Kordiimonas; __Kordiimonas lacus	Bacteria	__Proteobacteria	__Alphaproteobacteria	__Kordiimonadales	__Kordiimonadaceae	__Kordiimonas	__Kordiimonas lacus	1	1	NR_116840.1	NA	NA	0	0	3	0	0	1	0	0	1	0	0	0	1	4	0
denovo544	Bacteria; __Actinobacteria; __Actinobacteria; __Micrococcales; __Intrasporangiaceae; __Serinicoccus; __Serinicoccus profundi	Bacteria	__Actinobacteria	__Actinobacteria	__Micrococcales	__Intrasporangiaceae	__Serinicoccus	__Serinicoccus profundi	1	1	NR_116387.1	NA	NA	0	0	1	0	0	0	0	0	0	0	0	0	0	0	9
denovo545	Bacteria; __Bacteroidetes; __Saprospiria; __Saprospirales; __Lewinellaceae; __Lewinella; __Lewinella xylanilytica	Bacteria	__Bacteroidetes	__Saprospiria	__Saprospirales	__Lewinellaceae	__Lewinella	__Lewinella xylanilytica	1	1	NR_137393.1	NA	NA	0	0	0	0	0	0	0	0	0	0	0	4	0	0	0
denovo546	Bacteria; __Proteobacteria; __Gammaproteobacteria; __Cellvibrionales; __Cellvibrionaceae; __Pseudoteredinibacter; __Pseudoteredinibacter isoporae	Bacteria	__Proteobacteria	__Gammaproteobacteria	__Cellvibrionales	__Cellvibrionaceae	__Pseudoteredinibacter	__Pseudoteredinibacter isoporae	1	1	NR_116611.1	NA	NA	0	0	0	0	9	4	1	11	1	0	0	0	0	0	0
denovo547	Bacteria; __Verrucomicrobia; __Verrucomicrobiae; __Verrucomicrobiales; __Verrucomicrobiaceae; __Roseibacillus; __Roseibacillus persicicus	Bacteria	__Verrucomicrobia	__Verrucomicrobiae	__Verrucomicrobiales	__Verrucomicrobiaceae	__Roseibacillus	__Roseibacillus persicicus	1	1	NR_041623.1	NA	NA	0	0	0	0	0	1	0	0	0	0	0	0	0	6	0
denovo548	Bacteria; __Proteobacteria; __Alphaproteobacteria; __Rhizobiales; __Phyllobacteriaceae; __Aquamicrobium; __Aquamicrobium aestuarii	Bacteria	__Proteobacteria	__Alphaproteobacteria	__Rhizobiales	__Phyllobacteriaceae	__Aquamicrobium	__Aquamicrobium aestuarii	1	1	NR_108709.1	NA	NA	0	0	0	0	0	3	0	0	0	0	0	0	0	4	0
denovo549	Bacteria; __Proteobacteria; __Gammaproteobacteria; __Alteromonadales; __Colwelliaceae; __Thalassotalea; __Thalassotalea eurytherma	Bacteria	__Proteobacteria	__Gammaproteobacteria	__Alteromonadales	__Colwelliaceae	__Thalassotalea	__Thalassotalea eurytherma	1	1	NR_133879.1	NA	NA	2	0	0	0	0	0	2	0	0	0	0	0	0	0	0
denovo550	Bacteria; __Proteobacteria; __Alphaproteobacteria; __Rhodobacterales; __Rhodobacteraceae; __Pseudorhodobacter; __Pseudorhodobacter wandonensis	Bacteria	__Proteobacteria	__Alphaproteobacteria	__Rhodobacterales	__Rhodobacteraceae	__Pseudorhodobacter	__Pseudorhodobacter wandonensis	1	1	NR_109461.1	NA	NA	0	0	6	0	3	6	0	0	5	0	0	0	0	0	0
denovo551	Bacteria; __Proteobacteria; __Betaproteobacteria; __Burkholderiales; __Comamonadaceae; __Limnohabitans; __Limnohabitans planktonicus	Bacteria	__Proteobacteria	__Betaproteobacteria	__Burkholderiales	__Comamonadaceae	__Limnohabitans	__Limnohabitans planktonicus	1	1	NR_125541.1	NA	NA	0	0	0	0	0	0	0	0	0	0	0	0	0	0	11
denovo552	Bacteria; __Actinobacteria; __Actinobacteria; __Corynebacteriales; __Corynebacteriaceae; __Corynebacterium; __Corynebacterium lipophiloflavum	Bacteria	__Actinobacteria	__Actinobacteria	__Corynebacteriales	__Corynebacteriaceae	__Corynebacterium	__Corynebacterium lipophiloflavum	1	1	NR_026370.1	NA	NA	0	0	0	0	0	0	0	0	0	0	0	0	0	0	17
denovo553	Bacteria; __Proteobacteria; __Alphaproteobacteria; __Rhodobacterales; __Rhodobacteraceae; __Planktotalea; __Planktotalea frisia	Bacteria	__Proteobacteria	__Alphaproteobacteria	__Rhodobacterales	__Rhodobacteraceae	__Planktotalea	__Planktotalea frisia	1	1	NR_108442.1	NA	NA	0	4	0	0	1	0	1	2	2	0	0	0	0	0	0
denovo554	Bacteria; __Proteobacteria; __Gammaproteobacteria; __Alteromonadales; __Alteromonadaceae; __Paraglaciecola; __Paraglaciecola hydrolytica	Bacteria	__Proteobacteria	__Gammaproteobacteria	__Alteromonadales	__Alteromonadaceae	__Paraglaciecola	__Paraglaciecola hydrolytica	1	1	NR_157658.1	NA	NA	1	0	0	0	0	0	3	0	0	0	0	0	0	0	0
denovo555	; __; __; __; __; __; __		__	__	__	__	__	__	1	1	NA	NA	NA	0	0	0	0	0	0	0	0	0	0	0	0	0	0	4
denovo556	Bacteria; __Bacteroidetes; __Sphingobacteriia; __Sphingobacteriales; __Sphingobacteriaceae; __Pedobacter; __Pedobacter composti	Bacteria	__Bacteroidetes	__Sphingobacteriia	__Sphingobacteriales	__Sphingobacteriaceae	__Pedobacter	__Pedobacter composti	1	1	NR_041506.1	NA	NA	0	0	0	0	0	0	0	0	0	0	0	0	0	0	17
denovo557	Bacteria; __Acidobacteria; __Vicinamibacteria; __; __Vicinamibacteraceae; __Vicinamibacter; __Vicinamibacter silvestris	Bacteria	__Acidobacteria	__Vicinamibacteria	__	__Vicinamibacteraceae	__Vicinamibacter	__Vicinamibacter silvestris	1	1	NR_151905.1	NA	NA	0	8	2	0	0	2	0	0	1	0	0	0	0	0	0
denovo558	; __; __; __; __; __; __		__	__	__	__	__	__	1	1	NA	NA	NA	0	0	0	0	4	0	0	0	0	0	0	0	0	0	0
denovo559	; __; __; __; __; __; __		__	__	__	__	__	__	1	1	NA	NA	NA	0	0	0	0	0	0	0	0	0	4	0	0	0	0	0
denovo560	Bacteria; __Proteobacteria; __Betaproteobacteria; __Burkholderiales; __Comamonadaceae; __Simplicispira; __Simplicispira soli	Bacteria	__Proteobacteria	__Betaproteobacteria	__Burkholderiales	__Comamonadaceae	__Simplicispira	__Simplicispira soli	1	1	NR_159921.1	NA	NA	0	0	0	0	0	0	0	0	0	0	0	0	0	0	7
denovo561	Bacteria; __Bacteroidetes; __Flavobacteriia; __Flavobacteriales; __Flavobacteriaceae; __Ulvibacter; __Ulvibacter litoralis	Bacteria	__Bacteroidetes	__Flavobacteriia	__Flavobacteriales	__Flavobacteriaceae	__Ulvibacter	__Ulvibacter litoralis	1	1	NR_025731.1	NA	NA	0	0	0	0	0	0	0	0	0	0	0	0	4	0	0
denovo562	Bacteria; __Proteobacteria; __Alphaproteobacteria; __Sphingomonadales; __Erythrobacteraceae; __Erythrobacter; __Erythrobacter gaetbuli	Bacteria	__Proteobacteria	__Alphaproteobacteria	__Sphingomonadales	__Erythrobacteraceae	__Erythrobacter	__Erythrobacter gaetbuli	1	1	NR_025818.1	NA	NA	1	0	2	2	0	4	1	2	3	2	0	0	0	7	0
denovo563	Bacteria; __Firmicutes; __Clostridia; __Clostridiales; __Peptococcaceae; __Desulfofundulus; __Desulfofundulus luciae	Bacteria	__Firmicutes	__Clostridia	__Clostridiales	__Peptococcaceae	__Desulfofundulus	__Desulfofundulus luciae	1	1	NR_117590.1	NA	NA	0	4	10	0	0	1	0	0	5	0	0	0	0	0	0
denovo564	; __; __; __; __; __; __		__	__	__	__	__	__	1	1	NA	NA	NA	0	2	2	0	0	3	0	0	0	0	0	0	0	0	0
denovo565	Bacteria; __Proteobacteria; __Alphaproteobacteria; __Rhizobiales; __Rhizobiaceae; __Rhizobium; __Rhizobium endophyticum	Bacteria	__Proteobacteria	__Alphaproteobacteria	__Rhizobiales	__Rhizobiaceae	__Rhizobium	__Rhizobium endophyticum	1	1	NR_116477.1	NA	NA	0	0	0	0	0	0	0	0	0	0	0	0	0	0	10
denovo566	Bacteria; __Fusobacteria; __Fusobacteriia; __Fusobacteriales; __Leptotrichiaceae; __Leptotrichia; __Leptotrichia wadei	Bacteria	__Fusobacteria	__Fusobacteriia	__Fusobacteriales	__Leptotrichiaceae	__Leptotrichia	__Leptotrichia wadei	1	1	NR_113229.1	NA	NA	0	0	0	0	0	0	0	0	0	0	0	0	0	0	17
denovo567	Bacteria; __Actinobacteria; __Actinobacteria; __Bifidobacteriales; __Bifidobacteriaceae; __Bifidobacterium; __Bifidobacterium longum	Bacteria	__Actinobacteria	__Actinobacteria	__Bifidobacteriales	__Bifidobacteriaceae	__Bifidobacterium	__Bifidobacterium longum	1	1	NR_145535.1	NA	NA	0	0	0	0	0	0	0	0	0	0	0	0	0	0	10
denovo568	Bacteria; __Proteobacteria; __Alphaproteobacteria; __Rickettsiales; __Rickettsiaceae; __Orientia; __Orientia tsutsugamushi	Bacteria	__Proteobacteria	__Alphaproteobacteria	__Rickettsiales	__Rickettsiaceae	__Orientia	__Orientia tsutsugamushi	1	1	NR_025860.1	NA	NA	0	1	0	0	8	0	0	0	2	0	0	0	0	0	0
denovo569	Bacteria; __Planctomycetes; __Phycisphaerae; __Phycisphaerales; __Phycisphaeraceae; __Algisphaera; __Algisphaera agarilytica	Bacteria	__Planctomycetes	__Phycisphaerae	__Phycisphaerales	__Phycisphaeraceae	__Algisphaera	__Algisphaera agarilytica	1	1	NR_125472.1	NA	NA	0	0	0	0	0	0	0	0	0	2	0	1	0	1	0
denovo570	Bacteria; __Proteobacteria; __Gammaproteobacteria; __Cellvibrionales; __Spongiibacteraceae; __Dasania; __Dasania marina	Bacteria	__Proteobacteria	__Gammaproteobacteria	__Cellvibrionales	__Spongiibacteraceae	__Dasania	__Dasania marina	1	1	NR_043175.1	NA	NA	0	0	0	1	0	0	6	0	0	0	0	0	0	0	0
denovo571	Bacteria; __Bacteroidetes; __Bacteroidia; __Bacteroidales; __Muribaculaceae; __Muribaculum; __Muribaculum intestinale	Bacteria	__Bacteroidetes	__Bacteroidia	__Bacteroidales	__Muribaculaceae	__Muribaculum	__Muribaculum intestinale	1	1	NR_144616.1	NA	NA	0	0	0	0	0	0	0	0	0	0	0	0	0	0	4
denovo572	Bacteria; __Proteobacteria; __Alphaproteobacteria; __Rhodospirillales; __Rhodospirillaceae; __Fodinicurvata; __Fodinicurvata halophila	Bacteria	__Proteobacteria	__Alphaproteobacteria	__Rhodospirillales	__Rhodospirillaceae	__Fodinicurvata	__Fodinicurvata halophila	1	1	NR_134730.1	NA	NA	0	1	1	0	7	12	0	0	5	0	0	0	0	0	0
denovo573	; __; __; __; __; __; __		__	__	__	__	__	__	1	1	NA	NA	NA	0	0	0	0	0	0	0	0	0	0	0	1	0	6	0
denovo574	Bacteria; __Proteobacteria; __Oligoflexia; __Bdellovibrionales; __Bdellovibrionaceae; __Bdellovibrio; __Bdellovibrio bacteriovorus	Bacteria	__Proteobacteria	__Oligoflexia	__Bdellovibrionales	__Bdellovibrionaceae	__Bdellovibrio	__Bdellovibrio bacteriovorus	1	1	NR_027553.1	NA	NA	0	0	0	0	0	0	0	0	0	0	0	0	0	0	4
denovo575	Bacteria; __Proteobacteria; __Alphaproteobacteria; __Sphingomonadales; __Erythrobacteraceae; __Erythrobacter; __Erythrobacter pelagi	Bacteria	__Proteobacteria	__Alphaproteobacteria	__Sphingomonadales	__Erythrobacteraceae	__Erythrobacter	__Erythrobacter pelagi	1	1	NR_117936.1	NA	NA	4	4	3	0	2	0	0	0	1	1	0	0	1	0	0
denovo576	Bacteria; __Cyanobacteria; __; __Pleurocapsales; __Dermocarpellaceae; __Stanieria; __Stanieria cyanosphaera	Bacteria	__Cyanobacteria	__	__Pleurocapsales	__Dermocarpellaceae	__Stanieria	__Stanieria cyanosphaera	1	1	NR_102468.1	NA	NA	0	0	0	0	0	0	0	0	0	0	1	1	5	0	0
denovo577	Bacteria; __Actinobacteria; __Actinobacteria; __Corynebacteriales; __Dietziaceae; __Dietzia; __Dietzia maris	Bacteria	__Actinobacteria	__Actinobacteria	__Corynebacteriales	__Dietziaceae	__Dietzia	__Dietzia maris	1	1	NR_118596.1	NA	NA	0	2	1	0	0	0	0	0	0	0	0	0	0	0	8
denovo578	Bacteria; __Proteobacteria; __Betaproteobacteria; __Burkholderiales; __Oxalobacteraceae; __Massilia; __Massilia oculi	Bacteria	__Proteobacteria	__Betaproteobacteria	__Burkholderiales	__Oxalobacteraceae	__Massilia	__Massilia oculi	1	1	NR_117180.1	NA	NA	0	0	2	0	0	0	0	0	0	0	0	0	0	0	8
denovo579	Bacteria; __Proteobacteria; __Gammaproteobacteria; __Pseudomonadales; __Moraxellaceae; __Acinetobacter; __Acinetobacter dispersus	Bacteria	__Proteobacteria	__Gammaproteobacteria	__Pseudomonadales	__Moraxellaceae	__Acinetobacter	__Acinetobacter dispersus	1	1	NR_148844.1	NA	NA	0	0	0	0	0	0	0	0	0	0	0	0	0	0	20
denovo580	Bacteria; __Bacteroidetes; __Saprospiria; __Saprospirales; __Saprospiraceae; __Aureispira; __Aureispira maritima	Bacteria	__Bacteroidetes	__Saprospiria	__Saprospirales	__Saprospiraceae	__Aureispira	__Aureispira maritima	1	1	NR_041537.1	NA	NA	0	0	0	0	0	0	0	0	0	0	0	0	0	4	0
denovo581	Bacteria; __Acidobacteria; __Vicinamibacteria; __; __Vicinamibacteraceae; __Vicinamibacter; __Vicinamibacter silvestris	Bacteria	__Acidobacteria	__Vicinamibacteria	__	__Vicinamibacteraceae	__Vicinamibacter	__Vicinamibacter silvestris	1	1	NR_151905.1	NA	NA	0	9	2	0	0	3	0	0	3	0	0	0	0	0	0
denovo582	Bacteria; __Bacteroidetes; __Bacteroidia; __Bacteroidales; __Prevotellaceae; __Alloprevotella; __Alloprevotella tannerae	Bacteria	__Bacteroidetes	__Bacteroidia	__Bacteroidales	__Prevotellaceae	__Alloprevotella	__Alloprevotella tannerae	1	1	NR_037088.1	NA	NA	0	0	0	0	0	0	0	0	0	0	0	0	0	0	8
denovo583	Bacteria; __Bacteroidetes; __Flavobacteriia; __Flavobacteriales; __Flavobacteriaceae; __Polaribacter; __Polaribacter tangerinus	Bacteria	__Bacteroidetes	__Flavobacteriia	__Flavobacteriales	__Flavobacteriaceae	__Polaribacter	__Polaribacter tangerinus	1	1	NR_159133.1	NA	NA	0	0	0	0	2	0	0	0	0	0	0	2	0	0	0
denovo584	Bacteria; __Bacteroidetes; __Flavobacteriia; __Flavobacteriales; __Flavobacteriaceae; __Polaribacter; __Polaribacter dokdonensis	Bacteria	__Bacteroidetes	__Flavobacteriia	__Flavobacteriales	__Flavobacteriaceae	__Polaribacter	__Polaribacter dokdonensis	1	1	NR_043456.1	NA	NA	0	0	0	0	3	0	1	0	0	0	0	0	0	0	0
denovo585	; __; __; __; __; __; __		__	__	__	__	__	__	1	1	NA	NA	NA	0	0	9	0	0	0	0	0	4	0	0	0	0	3	0
denovo586	; __; __; __; __; __; __		__	__	__	__	__	__	1	1	NA	NA	NA	0	0	0	0	0	0	0	0	0	0	0	0	0	0	4
denovo587	Bacteria; __Cyanobacteria; __; __Nostocales; __Calotrichaceae; __Dulcicalothrix; __Dulcicalothrix necridiiformans	Bacteria	__Cyanobacteria	__	__Nostocales	__Calotrichaceae	__Dulcicalothrix	__Dulcicalothrix necridiiformans	1	1	NR_164867.1	NA	NA	0	3	4	4	3	3	2	0	2	0	0	0	0	0	4
denovo588	Bacteria; __Cyanobacteria; __; __Pleurocapsales; __Dermocarpellaceae; __Stanieria; __Stanieria cyanosphaera	Bacteria	__Cyanobacteria	__	__Pleurocapsales	__Dermocarpellaceae	__Stanieria	__Stanieria cyanosphaera	1	1	NR_102468.1	NA	NA	0	0	0	0	0	0	0	0	0	0	0	0	0	0	10
denovo589	; __; __; __; __; __; __		__	__	__	__	__	__	1	1	NA	NA	NA	0	4	2	0	0	4	0	0	0	0	0	0	0	0	0
denovo590	Bacteria; __Proteobacteria; __Gammaproteobacteria; __Cellvibrionales; __Cellvibrionaceae; __Eionea; __Eionea flava	Bacteria	__Proteobacteria	__Gammaproteobacteria	__Cellvibrionales	__Cellvibrionaceae	__Eionea	__Eionea flava	1	1	NR_137230.1	NA	NA	0	0	0	9	0	0	4	3	0	3	0	0	0	0	0
denovo591	Bacteria; __Proteobacteria; __Gammaproteobacteria; __Oceanospirillales; __Oceanospirillaceae; __Thalassolituus; __Thalassolituus oleivorans	Bacteria	__Proteobacteria	__Gammaproteobacteria	__Oceanospirillales	__Oceanospirillaceae	__Thalassolituus	__Thalassolituus oleivorans	1	1	NR_102806.1	NA	NA	5	2	2	0	0	0	1	0	0	0	0	0	6	0	0
denovo592	Bacteria; __Proteobacteria; __Gammaproteobacteria; __Oceanospirillales; __Oceanospirillaceae; __Oleibacter; __Oleibacter marinus	Bacteria	__Proteobacteria	__Gammaproteobacteria	__Oceanospirillales	__Oceanospirillaceae	__Oleibacter	__Oleibacter marinus	1	1	NR_114287.1	NA	NA	0	0	0	0	0	0	0	0	0	0	0	0	4	0	0
denovo593	Bacteria; __Proteobacteria; __Gammaproteobacteria; __Alteromonadales; __Shewanellaceae; __Shewanella; __Shewanella frigidimarina	Bacteria	__Proteobacteria	__Gammaproteobacteria	__Alteromonadales	__Shewanellaceae	__Shewanella	__Shewanella frigidimarina	1	1	NR_117528.1	NA	NA	0	1	1	0	0	2	0	0	0	0	0	0	0	0	0
denovo594	Bacteria; __Actinobacteria; __Acidimicrobiia; __Acidimicrobiales; __Acidimicrobiaceae; __Aciditerrimonas; __Aciditerrimonas ferrireducens	Bacteria	__Actinobacteria	__Acidimicrobiia	__Acidimicrobiales	__Acidimicrobiaceae	__Aciditerrimonas	__Aciditerrimonas ferrireducens	1	1	NR_112972.1	NA	NA	0	3	0	0	0	0	0	0	0	0	0	0	0	7	0
denovo595	Bacteria; __Proteobacteria; __Alphaproteobacteria; __Rhizobiales; __; __Methyloligella; __Methyloligella solikamskensis	Bacteria	__Proteobacteria	__Alphaproteobacteria	__Rhizobiales	__	__Methyloligella	__Methyloligella solikamskensis	1	1	NR_125614.1	NA	NA	0	0	0	0	0	0	0	0	0	4	0	0	0	0	0
denovo596	; __; __; __; __; __; __		__	__	__	__	__	__	1	1	NA	NA	NA	0	3	0	0	1	2	0	0	1	0	0	0	0	0	0
denovo597	Bacteria; __Planctomycetes; __Planctomycetia; __Planctomycetales; __Planctomycetaceae; __Gimesia; __Gimesia maris	Bacteria	__Planctomycetes	__Planctomycetia	__Planctomycetales	__Planctomycetaceae	__Gimesia	__Gimesia maris	1	1	NR_025327.1	NA	NA	0	0	3	0	0	1	0	0	1	0	0	0	0	5	0
denovo598	; __; __; __; __; __; __		__	__	__	__	__	__	1	1	NA	NA	NA	0	0	0	0	0	0	0	0	0	0	0	0	0	4	0
denovo599	Bacteria; __Planctomycetes; __Planctomycetia; __Isosphaerales; __Isosphaeraceae; __Tundrisphaera; __Tundrisphaera lichenicola	Bacteria	__Planctomycetes	__Planctomycetia	__Isosphaerales	__Isosphaeraceae	__Tundrisphaera	__Tundrisphaera lichenicola	1	1	NR_158050.1	NA	NA	0	0	0	0	0	0	0	0	0	0	0	0	0	0	4
denovo600	Bacteria; __Proteobacteria; __Alphaproteobacteria; __Sphingomonadales; __Sphingomonadaceae; __Aestuariisphingobium; __Aestuariisphingobium litorale	Bacteria	__Proteobacteria	__Alphaproteobacteria	__Sphingomonadales	__Sphingomonadaceae	__Aestuariisphingobium	__Aestuariisphingobium litorale	1	1	NR_164970.1	NA	NA	0	0	0	0	0	0	0	0	0	0	0	0	0	0	7
denovo601	Bacteria; __Proteobacteria; __Alphaproteobacteria; __Rhodobacterales; __Rhodobacteraceae; __Oceanicella; __Oceanicella actignis	Bacteria	__Proteobacteria	__Alphaproteobacteria	__Rhodobacterales	__Rhodobacteraceae	__Oceanicella	__Oceanicella actignis	1	1	NR_109312.1	NA	NA	0	0	3	0	0	1	0	0	3	0	0	0	0	0	0
denovo602	Bacteria; __Cyanobacteria; __; __Pleurocapsales; __Xenococcaceae; __Foliisarcina; __Foliisarcina bertiogensis	Bacteria	__Cyanobacteria	__	__Pleurocapsales	__Xenococcaceae	__Foliisarcina	__Foliisarcina bertiogensis	1	1	NR_148664.1	NA	NA	0	0	0	0	0	0	0	0	0	4	0	0	0	0	0
denovo603	Bacteria; __Firmicutes; __Bacilli; __Bacillales; __Bacillaceae; __Anoxybacillus; __Anoxybacillus tepidamans	Bacteria	__Firmicutes	__Bacilli	__Bacillales	__Bacillaceae	__Anoxybacillus	__Anoxybacillus tepidamans	1	1	NR_116985.1	NA	NA	0	0	0	0	0	0	0	0	0	0	0	0	0	0	13
denovo604	Bacteria; __Proteobacteria; __Alphaproteobacteria; __Rhodospirillales; __Rhodospirillaceae; __Oceanibaculum; __Oceanibaculum pacificum	Bacteria	__Proteobacteria	__Alphaproteobacteria	__Rhodospirillales	__Rhodospirillaceae	__Oceanibaculum	__Oceanibaculum pacificum	1	1	NR_116679.1	NA	NA	0	0	0	0	0	0	0	0	2	0	0	1	1	3	0
denovo605	Bacteria; __Proteobacteria; __Deltaproteobacteria; __Desulfovibrionales; __Desulfonatronaceae; __Desulfonatronum; __Desulfonatronum parangueonense	Bacteria	__Proteobacteria	__Deltaproteobacteria	__Desulfovibrionales	__Desulfonatronaceae	__Desulfonatronum	__Desulfonatronum parangueonense	1	1	NR_159236.1	NA	NA	0	0	0	0	0	1	0	0	5	0	1	0	2	4	0
denovo606	Bacteria; __Proteobacteria; __Betaproteobacteria; __Burkholderiales; __Comamonadaceae; __Acidovorax; __Acidovorax wautersii	Bacteria	__Proteobacteria	__Betaproteobacteria	__Burkholderiales	__Comamonadaceae	__Acidovorax	__Acidovorax wautersii	1	1	NR_109656.1	NA	NA	0	0	0	0	0	0	0	0	0	0	0	0	0	0	7
denovo607	Bacteria; __Bacteroidetes; __Bacteroidia; __Bacteroidales; __Bacteroidaceae; __Bacteroides; __Bacteroides uniformis	Bacteria	__Bacteroidetes	__Bacteroidia	__Bacteroidales	__Bacteroidaceae	__Bacteroides	__Bacteroides uniformis	1	1	NR_112945.1	NA	NA	0	0	0	0	0	0	0	0	0	0	0	0	0	0	16
denovo608	Bacteria; __Spirochaetes; __Spirochaetia; __Spirochaetales; __Spirochaetaceae; __Treponema; __Treponema amylovorum	Bacteria	__Spirochaetes	__Spirochaetia	__Spirochaetales	__Spirochaetaceae	__Treponema	__Treponema amylovorum	1	1	NR_026377.1	NA	NA	0	0	0	0	0	0	0	0	0	0	0	0	0	0	13
denovo609	Bacteria; __Actinobacteria; __Actinobacteria; __Corynebacteriales; __Mycobacteriaceae; __Mycolicibacterium; __Mycolicibacterium gilvum	Bacteria	__Actinobacteria	__Actinobacteria	__Corynebacteriales	__Mycobacteriaceae	__Mycolicibacterium	__Mycolicibacterium gilvum	1	1	NR_037071.1	NA	NA	0	0	0	0	0	0	0	0	0	0	0	0	0	0	4
denovo610	Bacteria; __Actinobacteria; __Acidimicrobiia; __Acidimicrobiales; __Ilumatobacteraceae; __Ilumatobacter; __Ilumatobacter fluminis	Bacteria	__Actinobacteria	__Acidimicrobiia	__Acidimicrobiales	__Ilumatobacteraceae	__Ilumatobacter	__Ilumatobacter fluminis	1	1	NR_041633.1	NA	NA	0	2	2	0	0	0	0	0	0	0	0	0	0	0	0
denovo611	Bacteria; __Proteobacteria; __Alphaproteobacteria; __Rhodospirillales; __Rhodospirillaceae; __Limibacillus; __Limibacillus halophilus	Bacteria	__Proteobacteria	__Alphaproteobacteria	__Rhodospirillales	__Rhodospirillaceae	__Limibacillus	__Limibacillus halophilus	1	1	NR_137248.1	NA	NA	0	2	0	0	0	2	0	0	0	0	0	0	0	0	0
denovo612	Bacteria; __Proteobacteria; __Betaproteobacteria; __Burkholderiales; __Oxalobacteraceae; __Undibacterium; __Undibacterium aquatile	Bacteria	__Proteobacteria	__Betaproteobacteria	__Burkholderiales	__Oxalobacteraceae	__Undibacterium	__Undibacterium aquatile	1	1	NR_145649.1	NA	NA	0	0	0	0	0	0	0	0	0	0	0	0	0	0	4
denovo613	Bacteria; __Proteobacteria; __Alphaproteobacteria; __Rhodospirillales; __Rhodospirillaceae; __Fodinicurvata; __Fodinicurvata halophila	Bacteria	__Proteobacteria	__Alphaproteobacteria	__Rhodospirillales	__Rhodospirillaceae	__Fodinicurvata	__Fodinicurvata halophila	1	1	NR_134730.1	NA	NA	0	0	0	0	0	0	0	0	0	0	0	0	0	4	0
denovo614	Bacteria; __Proteobacteria; __Gammaproteobacteria; __Cellvibrionales; __Porticoccaceae; __Porticoccus; __Porticoccus hydrocarbonoclasticus	Bacteria	__Proteobacteria	__Gammaproteobacteria	__Cellvibrionales	__Porticoccaceae	__Porticoccus	__Porticoccus hydrocarbonoclasticus	1	1	NR_118247.1	NA	NA	0	0	0	0	0	0	4	0	0	0	0	0	0	0	0
denovo615	Bacteria; __Proteobacteria; __Betaproteobacteria; __Burkholderiales; __; __Aquabacterium; __Aquabacterium parvum	Bacteria	__Proteobacteria	__Betaproteobacteria	__Burkholderiales	__	__Aquabacterium	__Aquabacterium parvum	1	1	NR_024874.1	NA	NA	4	0	0	0	0	0	8	0	0	0	0	0	0	0	7
denovo616	Bacteria; __Proteobacteria; __Gammaproteobacteria; __Alteromonadales; __Pseudoalteromonadaceae; __Pseudoalteromonas; __Pseudoalteromonas ulvae	Bacteria	__Proteobacteria	__Gammaproteobacteria	__Alteromonadales	__Pseudoalteromonadaceae	__Pseudoalteromonas	__Pseudoalteromonas ulvae	1	1	NR_025032.1	NA	NA	0	0	0	0	0	0	0	0	0	0	0	0	0	4	0
denovo617	Bacteria; __Proteobacteria; __Alphaproteobacteria; __Rhodobacterales; __Rhodobacteraceae; __Limimaricola; __Limimaricola aestuariicola	Bacteria	__Proteobacteria	__Alphaproteobacteria	__Rhodobacterales	__Rhodobacteraceae	__Limimaricola	__Limimaricola aestuariicola	1	1	NR_145549.1	NA	NA	0	5	0	0	0	1	1	0	2	0	0	1	0	0	0
denovo618	Bacteria; __Proteobacteria; __Alphaproteobacteria; __Rhodobacterales; __Rhodobacteraceae; __Celeribacter; __Celeribacter baekdonensis	Bacteria	__Proteobacteria	__Alphaproteobacteria	__Rhodobacterales	__Rhodobacteraceae	__Celeribacter	__Celeribacter baekdonensis	1	1	NR_117908.1	NA	NA	0	0	0	1	0	0	1	0	0	0	0	2	0	0	0
denovo619	Bacteria; __Proteobacteria; __Betaproteobacteria; __Burkholderiales; __; __Tepidimonas; __Tepidimonas fonticaldi	Bacteria	__Proteobacteria	__Betaproteobacteria	__Burkholderiales	__	__Tepidimonas	__Tepidimonas fonticaldi	1	1	NR_109514.1	NA	NA	0	0	0	0	0	0	0	0	0	0	0	0	0	0	4
denovo620	Bacteria; __Proteobacteria; __Gammaproteobacteria; __Chromatiales; __Thioprofundaceae; __Thioprofundum; __Thioprofundum lithotrophicum	Bacteria	__Proteobacteria	__Gammaproteobacteria	__Chromatiales	__Thioprofundaceae	__Thioprofundum	__Thioprofundum lithotrophicum	1	1	NR_112829.1	NA	NA	0	5	2	0	0	7	0	0	2	0	0	0	1	0	0
denovo621	; __; __; __; __; __; __		__	__	__	__	__	__	1	1	NA	NA	NA	0	0	0	0	0	4	0	0	0	0	0	0	0	0	0
denovo622	Bacteria; __Proteobacteria; __Betaproteobacteria; __Nitrosomonadales; __Methylophilaceae; __Methylovorus; __Methylovorus glucosotrophus	Bacteria	__Proteobacteria	__Betaproteobacteria	__Nitrosomonadales	__Methylophilaceae	__Methylovorus	__Methylovorus glucosotrophus	1	1	NR_104761.1	NA	NA	0	0	0	0	0	0	0	0	0	0	0	0	0	0	7
denovo623	Bacteria; __Proteobacteria; __Gammaproteobacteria; __Vibrionales; __Vibrionaceae; __Vibrio; __Vibrio cidicii	Bacteria	__Proteobacteria	__Gammaproteobacteria	__Vibrionales	__Vibrionaceae	__Vibrio	__Vibrio cidicii	1	1	NR_152085.1	NA	NA	0	0	0	0	2	0	5	0	0	0	0	0	0	0	0
denovo624	; __; __; __; __; __; __		__	__	__	__	__	__	1	1	NA	NA	NA	0	2	3	0	0	1	0	0	4	0	0	0	0	0	0
denovo625	Bacteria; __Verrucomicrobia; __Verrucomicrobiae; __Verrucomicrobiales; __Verrucomicrobiaceae; __Haloferula; __Haloferula harenae	Bacteria	__Verrucomicrobia	__Verrucomicrobiae	__Verrucomicrobiales	__Verrucomicrobiaceae	__Haloferula	__Haloferula harenae	1	1	NR_041670.1	NA	NA	0	0	0	0	0	0	0	0	0	0	0	0	3	7	0
denovo626	Bacteria; __Proteobacteria; __Betaproteobacteria; __Burkholderiales; __Comamonadaceae; __Acidovorax; __Acidovorax lacteus	Bacteria	__Proteobacteria	__Betaproteobacteria	__Burkholderiales	__Comamonadaceae	__Acidovorax	__Acidovorax lacteus	1	1	NR_152623.1	NA	NA	0	0	0	0	0	0	0	0	0	0	0	0	0	0	13
denovo627	Bacteria; __Proteobacteria; __Gammaproteobacteria; __Chromatiales; __Thioprofundaceae; __Thioprofundum; __Thioprofundum lithotrophicum	Bacteria	__Proteobacteria	__Gammaproteobacteria	__Chromatiales	__Thioprofundaceae	__Thioprofundum	__Thioprofundum lithotrophicum	1	1	NR_112829.1	NA	NA	0	0	2	0	0	1	0	0	1	0	0	0	0	0	0
denovo628	Bacteria; __Firmicutes; __Bacilli; __Lactobacillales; __Lactobacillaceae; __Lactobacillus; __Lactobacillus ultunensis	Bacteria	__Firmicutes	__Bacilli	__Lactobacillales	__Lactobacillaceae	__Lactobacillus	__Lactobacillus ultunensis	1	1	NR_117065.1	NA	NA	0	0	0	0	0	0	0	0	0	0	0	0	0	0	22
denovo629	Bacteria; __Bacteroidetes; __Flavobacteriia; __Flavobacteriales; __Cryomorphaceae; __Owenweeksia; __Owenweeksia hongkongensis	Bacteria	__Bacteroidetes	__Flavobacteriia	__Flavobacteriales	__Cryomorphaceae	__Owenweeksia	__Owenweeksia hongkongensis	1	1	NR_074100.1	NA	NA	0	0	3	0	0	0	0	0	1	0	0	0	0	0	0
denovo630	Bacteria; __Actinobacteria; __Actinobacteria; __Propionibacteriales; __Nocardioidaceae; __Marmoricola; __Marmoricola bigeumensis	Bacteria	__Actinobacteria	__Actinobacteria	__Propionibacteriales	__Nocardioidaceae	__Marmoricola	__Marmoricola bigeumensis	1	1	NR_044232.2	NA	NA	0	0	0	0	0	0	0	0	0	0	0	0	0	0	4
denovo631	Bacteria; __Proteobacteria; __Deltaproteobacteria; __Myxococcales; __Anaeromyxobacteraceae; __Anaeromyxobacter; __Anaeromyxobacter dehalogenans	Bacteria	__Proteobacteria	__Deltaproteobacteria	__Myxococcales	__Anaeromyxobacteraceae	__Anaeromyxobacter	__Anaeromyxobacter dehalogenans	1	1	NR_074927.1	NA	NA	0	0	0	0	0	0	0	0	0	0	0	0	0	4	0
denovo632	Bacteria; __Bacteroidetes; __Flavobacteriia; __Flavobacteriales; __Flavobacteriaceae; __Lutibacter; __Lutibacter maritimus	Bacteria	__Bacteroidetes	__Flavobacteriia	__Flavobacteriales	__Flavobacteriaceae	__Lutibacter	__Lutibacter maritimus	1	1	NR_116738.1	NA	NA	2	0	0	1	3	2	9	2	0	0	0	0	0	0	0
denovo633	Bacteria; __Proteobacteria; __Gammaproteobacteria; __Thiotrichales; __Fastidiosibacteraceae; __Fangia; __Fangia hongkongensis	Bacteria	__Proteobacteria	__Gammaproteobacteria	__Thiotrichales	__Fastidiosibacteraceae	__Fangia	__Fangia hongkongensis	1	1	NR_041041.1	NA	NA	0	4	0	0	0	0	0	0	0	0	0	0	0	0	0
denovo634	Bacteria; __Cyanobacteria; __; __Synechococcales; __Chamaesiphonaceae; __Chamaesiphon; __Chamaesiphon minutus	Bacteria	__Cyanobacteria	__	__Synechococcales	__Chamaesiphonaceae	__Chamaesiphon	__Chamaesiphon minutus	1	1	NR_102459.1	NA	NA	6	0	0	1	0	0	0	3	0	0	0	0	0	0	0
denovo635	Bacteria; __Deinococcus-Thermus; __Deinococci; __Deinococcales; __Trueperaceae; __Truepera; __Truepera radiovictrix	Bacteria	__Deinococcus-Thermus	__Deinococci	__Deinococcales	__Trueperaceae	__Truepera	__Truepera radiovictrix	1	1	NR_074381.1	NA	NA	0	0	0	0	0	0	0	0	0	0	0	0	0	0	13
denovo636	Bacteria; __Bacteroidetes; __Flavobacteriia; __Flavobacteriales; __Flavobacteriaceae; __Lacinutrix; __Lacinutrix jangbogonensis	Bacteria	__Bacteroidetes	__Flavobacteriia	__Flavobacteriales	__Flavobacteriaceae	__Lacinutrix	__Lacinutrix jangbogonensis	1	1	NR_134754.1	NA	NA	0	0	0	0	3	0	0	0	0	0	0	0	0	0	0
denovo637	Bacteria; __Bacteroidetes; __Flavobacteriia; __Flavobacteriales; __Cryomorphaceae; __Owenweeksia; __Owenweeksia hongkongensis	Bacteria	__Bacteroidetes	__Flavobacteriia	__Flavobacteriales	__Cryomorphaceae	__Owenweeksia	__Owenweeksia hongkongensis	1	1	NR_074100.1	NA	NA	0	0	0	0	0	0	0	0	0	3	0	0	0	0	0
denovo638	; __; __; __; __; __; __		__	__	__	__	__	__	1	1	NA	NA	NA	0	0	0	0	0	0	0	3	0	0	0	0	0	0	0
denovo639	Bacteria; __Proteobacteria; __Gammaproteobacteria; __Thiotrichales; __Francisellaceae; __Pseudofrancisella; __Pseudofrancisella aestuarii	Bacteria	__Proteobacteria	__Gammaproteobacteria	__Thiotrichales	__Francisellaceae	__Pseudofrancisella	__Pseudofrancisella aestuarii	1	1	NR_164946.1	NA	NA	0	0	3	0	0	0	0	0	0	0	0	0	0	0	0
denovo640	; __; __; __; __; __; __		__	__	__	__	__	__	1	1	NA	NA	NA	0	0	0	0	0	0	0	0	0	0	0	0	0	3	0
denovo641	; __; __; __; __; __; __		__	__	__	__	__	__	1	1	NA	NA	NA	0	0	2	0	0	3	0	0	2	0	0	0	0	2	0
denovo642	Bacteria; __Proteobacteria; __Gammaproteobacteria; __Cellvibrionales; __Spongiibacteraceae; __Sinobacterium; __Sinobacterium norvegicum	Bacteria	__Proteobacteria	__Gammaproteobacteria	__Cellvibrionales	__Spongiibacteraceae	__Sinobacterium	__Sinobacterium norvegicum	1	1	NR_144601.1	NA	NA	0	0	0	0	3	0	0	0	0	0	0	0	0	0	0
denovo643	Bacteria; __Proteobacteria; __Gammaproteobacteria; __Enterobacterales; __Enterobacteriaceae; __Enterobacter; __Enterobacter cloacae	Bacteria	__Proteobacteria	__Gammaproteobacteria	__Enterobacterales	__Enterobacteriaceae	__Enterobacter	__Enterobacter cloacae	1	1	NR_118568.1	NA	NA	0	0	0	0	0	0	0	0	0	0	0	0	0	0	12
denovo644	Bacteria; __Fusobacteria; __Fusobacteriia; __Fusobacteriales; __Fusobacteriaceae; __Fusobacterium; __Fusobacterium nucleatum	Bacteria	__Fusobacteria	__Fusobacteriia	__Fusobacteriales	__Fusobacteriaceae	__Fusobacterium	__Fusobacterium nucleatum	1	1	NR_117289.1	NA	NA	0	0	0	0	0	0	0	0	0	0	0	0	0	0	6
denovo645	Bacteria; __Firmicutes; __Clostridia; __Clostridiales; __Peptococcaceae; __Desulfosporosinus; __Desulfosporosinus nitroreducens	Bacteria	__Firmicutes	__Clostridia	__Clostridiales	__Peptococcaceae	__Desulfosporosinus	__Desulfosporosinus nitroreducens	1	1	NR_156977.1	NA	NA	0	0	0	0	0	0	0	0	0	0	0	0	0	0	6
denovo646	Bacteria; __Proteobacteria; __Gammaproteobacteria; __Chromatiales; __Thioalkalispiraceae; __Endothiovibrio; __Endothiovibrio diazotrophicus	Bacteria	__Proteobacteria	__Gammaproteobacteria	__Chromatiales	__Thioalkalispiraceae	__Endothiovibrio	__Endothiovibrio diazotrophicus	1	1	NR_148570.1	NA	NA	0	0	0	0	0	3	0	0	0	0	0	0	0	0	0
denovo647	Bacteria; __Firmicutes; __Bacilli; __Bacillales; __Paenibacillaceae; __Paenibacillus; __Paenibacillus shunpengii	Bacteria	__Firmicutes	__Bacilli	__Bacillales	__Paenibacillaceae	__Paenibacillus	__Paenibacillus shunpengii	1	1	NR_159294.1	NA	NA	0	0	0	0	0	0	0	0	0	0	0	0	0	0	6
denovo648	Bacteria; __Proteobacteria; __Gammaproteobacteria; __Pseudomonadales; __Pseudomonadaceae; __Pseudomonas; __Pseudomonas salina	Bacteria	__Proteobacteria	__Gammaproteobacteria	__Pseudomonadales	__Pseudomonadaceae	__Pseudomonas	__Pseudomonas salina	1	1	NR_137210.1	NA	NA	0	0	4	0	0	1	0	0	3	0	0	0	0	1	0
denovo649	Bacteria; __Bacteroidetes; __Flavobacteriia; __Flavobacteriales; __Cryomorphaceae; __Salibacter; __Salibacter halophilus	Bacteria	__Bacteroidetes	__Flavobacteriia	__Flavobacteriales	__Cryomorphaceae	__Salibacter	__Salibacter halophilus	1	1	NR_156967.1	NA	NA	0	0	0	0	0	0	0	0	0	0	0	0	0	0	3
denovo650	Bacteria; __Firmicutes; __Clostridia; __Clostridiales; __Lachnospiraceae; __Enterocloster; __Enterocloster clostridioformis	Bacteria	__Firmicutes	__Clostridia	__Clostridiales	__Lachnospiraceae	__Enterocloster	__Enterocloster clostridioformis	1	1	NR_118128.1	NA	NA	0	0	0	0	0	0	0	0	0	0	0	0	0	0	6
denovo651	Bacteria; __Firmicutes; __Bacilli; __Bacillales; __Bacillaceae; __Bacillus; __Bacillus loiseleuriae	Bacteria	__Firmicutes	__Bacilli	__Bacillales	__Bacillaceae	__Bacillus	__Bacillus loiseleuriae	1	1	NR_149779.1	NA	NA	0	0	0	0	0	0	0	0	0	0	0	0	0	0	12
denovo652	Bacteria; __Firmicutes; __Clostridia; __Clostridiales; __Lachnospiraceae; __Stomatobaculum; __Stomatobaculum longum	Bacteria	__Firmicutes	__Clostridia	__Clostridiales	__Lachnospiraceae	__Stomatobaculum	__Stomatobaculum longum	1	1	NR_117792.1	NA	NA	0	0	0	0	0	0	0	0	0	0	0	0	0	0	12
denovo653	; __; __; __; __; __; __		__	__	__	__	__	__	1	1	NA	NA	NA	0	1	4	0	0	7	0	0	1	0	0	0	0	2	0
denovo654	Bacteria; __Bacteroidetes; __Flavobacteriia; __Flavobacteriales; __Flavobacteriaceae; __Salinimicrobium; __Salinimicrobium marinum	Bacteria	__Bacteroidetes	__Flavobacteriia	__Flavobacteriales	__Flavobacteriaceae	__Salinimicrobium	__Salinimicrobium marinum	1	1	NR_117409.1	NA	NA	1	0	2	0	0	0	0	0	0	0	0	0	0	0	0
denovo655	Bacteria; __Proteobacteria; __Alphaproteobacteria; __Rhodobacterales; __Rhodobacteraceae; __Planktomarina; __Planktomarina temperata	Bacteria	__Proteobacteria	__Alphaproteobacteria	__Rhodobacterales	__Rhodobacteraceae	__Planktomarina	__Planktomarina temperata	1	1	NR_125550.1	NA	NA	0	0	0	0	0	0	0	0	0	0	3	0	0	0	0
denovo656	Bacteria; __Bacteroidetes; __Flavobacteriia; __Flavobacteriales; __Cryomorphaceae; __Owenweeksia; __Owenweeksia hongkongensis	Bacteria	__Bacteroidetes	__Flavobacteriia	__Flavobacteriales	__Cryomorphaceae	__Owenweeksia	__Owenweeksia hongkongensis	1	1	NR_074100.1	NA	NA	0	0	0	0	0	0	0	0	0	0	0	0	0	3	0
denovo657	Bacteria; __Proteobacteria; __Alphaproteobacteria; __Pelagibacterales; __Pelagibacteraceae; __Candidatus Pelagibacter; __Candidatus Pelagibacter ubique	Bacteria	__Proteobacteria	__Alphaproteobacteria	__Pelagibacterales	__Pelagibacteraceae	__Candidatus Pelagibacter	__Candidatus Pelagibacter ubique	1	1	NR_074224.1	NA	NA	0	0	0	0	0	0	0	0	0	3	0	0	0	0	0
denovo658	; __; __; __; __; __; __		__	__	__	__	__	__	1	1	NA	NA	NA	0	0	0	0	0	0	0	3	0	0	0	0	0	0	0
denovo659	Bacteria; __Proteobacteria; __Alphaproteobacteria; __Rhizobiales; __Rhizobiaceae; __Shinella; __Shinella curvata	Bacteria	__Proteobacteria	__Alphaproteobacteria	__Rhizobiales	__Rhizobiaceae	__Shinella	__Shinella curvata	1	1	NR_152074.1	NA	NA	0	0	0	0	0	0	0	0	0	0	0	0	0	0	9
denovo660	Bacteria; __Proteobacteria; __Epsilonproteobacteria; __Campylobacterales; __Campylobacteraceae; __Campylobacter; __Campylobacter showae	Bacteria	__Proteobacteria	__Epsilonproteobacteria	__Campylobacterales	__Campylobacteraceae	__Campylobacter	__Campylobacter showae	1	1	NR_118526.1	NA	NA	0	0	0	0	0	0	0	0	0	0	0	0	0	0	6
denovo661	Bacteria; __Proteobacteria; __Alphaproteobacteria; __Rhodospirillales; __Rhodospirillaceae; __Magnetospira; __Magnetospira thiophila	Bacteria	__Proteobacteria	__Alphaproteobacteria	__Rhodospirillales	__Rhodospirillaceae	__Magnetospira	__Magnetospira thiophila	1	1	NR_116475.1	NA	NA	0	0	3	0	0	0	0	0	0	0	0	0	0	3	0
denovo662	Bacteria; __Bacteroidetes; __Cytophagia; __Cytophagales; __Hymenobacteraceae; __Hymenobacter; __Hymenobacter marinus	Bacteria	__Bacteroidetes	__Cytophagia	__Cytophagales	__Hymenobacteraceae	__Hymenobacter	__Hymenobacter marinus	1	1	NR_149279.1	NA	NA	0	0	0	0	0	0	0	0	0	0	0	0	0	0	3
denovo663	; __; __; __; __; __; __		__	__	__	__	__	__	1	1	NA	NA	NA	0	0	0	0	0	0	0	0	0	0	0	3	0	0	0
denovo664	Bacteria; __Proteobacteria; __Gammaproteobacteria; __Thiotrichales; __Piscirickettsiaceae; __Methylophaga; __Methylophaga alcalica	Bacteria	__Proteobacteria	__Gammaproteobacteria	__Thiotrichales	__Piscirickettsiaceae	__Methylophaga	__Methylophaga alcalica	1	1	NR_028824.1	NA	NA	0	0	0	0	0	0	0	0	0	0	0	0	0	3	0
denovo665	Bacteria; __Proteobacteria; __Alphaproteobacteria; __Rhodospirillales; __Rhodospirillaceae; __Nisaea; __Nisaea nitritireducens	Bacteria	__Proteobacteria	__Alphaproteobacteria	__Rhodospirillales	__Rhodospirillaceae	__Nisaea	__Nisaea nitritireducens	1	1	NR_043924.1	NA	NA	0	0	0	0	0	0	0	0	0	0	0	2	0	1	0
denovo666	Bacteria; __Proteobacteria; __Betaproteobacteria; __Burkholderiales; __Comamonadaceae; __Ottowia; __Ottowia shaoguanensis	Bacteria	__Proteobacteria	__Betaproteobacteria	__Burkholderiales	__Comamonadaceae	__Ottowia	__Ottowia shaoguanensis	1	1	NR_125656.1	NA	NA	0	0	0	0	0	0	0	0	0	0	0	0	0	0	3
denovo667	Bacteria; __Cyanobacteria; __; __Synechococcales; __Trichocoleusaceae; __Trichocoleus; __Trichocoleus desertorum	Bacteria	__Cyanobacteria	__	__Synechococcales	__Trichocoleusaceae	__Trichocoleus	__Trichocoleus desertorum	1	1	NR_125697.1	NA	NA	0	0	0	0	0	0	0	0	0	3	2	0	1	0	0
denovo668	Bacteria; __Bacteroidetes; __Flavobacteriia; __Flavobacteriales; __Flavobacteriaceae; __Chryseobacterium; __Chryseobacterium taiwanense	Bacteria	__Bacteroidetes	__Flavobacteriia	__Flavobacteriales	__Flavobacteriaceae	__Chryseobacterium	__Chryseobacterium taiwanense	1	1	NR_043715.1	NA	NA	0	0	0	0	0	0	0	0	0	0	0	0	0	0	3
denovo669	Bacteria; __Bacteroidetes; __Flavobacteriia; __Flavobacteriales; __Flavobacteriaceae; __Pseudofulvibacter; __Pseudofulvibacter gastropodicola	Bacteria	__Bacteroidetes	__Flavobacteriia	__Flavobacteriales	__Flavobacteriaceae	__Pseudofulvibacter	__Pseudofulvibacter gastropodicola	1	1	NR_147772.1	NA	NA	0	0	0	0	0	0	0	0	0	3	0	0	0	0	0
denovo670	; __; __; __; __; __; __		__	__	__	__	__	__	1	1	NA	NA	NA	0	2	0	0	0	1	0	0	3	0	0	0	0	0	0
denovo671	Bacteria; __Cyanobacteria; __; __Chroococcidiopsidales; __Chroococcidiopsidaceae; __Aliterella; __Aliterella antarctica	Bacteria	__Cyanobacteria	__	__Chroococcidiopsidales	__Chroococcidiopsidaceae	__Aliterella	__Aliterella antarctica	1	1	NR_151904.1	NA	NA	0	0	0	0	0	0	0	0	0	0	0	0	0	0	6
denovo672	Bacteria; __Proteobacteria; __Deltaproteobacteria; __Desulfuromonadales; __Geobacteraceae; __Geobacter; __Geobacter uraniireducens	Bacteria	__Proteobacteria	__Deltaproteobacteria	__Desulfuromonadales	__Geobacteraceae	__Geobacter	__Geobacter uraniireducens	1	1	NR_074940.1	NA	NA	0	0	0	0	0	1	0	0	5	0	0	0	0	0	0
denovo673	Bacteria; __Proteobacteria; __Betaproteobacteria; __Burkholderiales; __; __Rubrivivax; __Rubrivivax gelatinosus	Bacteria	__Proteobacteria	__Betaproteobacteria	__Burkholderiales	__	__Rubrivivax	__Rubrivivax gelatinosus	1	1	NR_025841.1	NA	NA	0	0	0	0	0	0	0	0	0	0	0	0	0	0	3
denovo674	Bacteria; __Bacteroidetes; __Flavobacteriia; __Flavobacteriales; __Cryomorphaceae; __Vicingus; __Vicingus serpentipes	Bacteria	__Bacteroidetes	__Flavobacteriia	__Flavobacteriales	__Cryomorphaceae	__Vicingus	__Vicingus serpentipes	1	1	NR_159281.1	NA	NA	0	0	0	0	0	3	0	0	0	0	0	0	0	0	0
denovo675	Bacteria; __Bacteroidetes; __Flavobacteriia; __Flavobacteriales; __Cryomorphaceae; __Vicingus; __Vicingus serpentipes	Bacteria	__Bacteroidetes	__Flavobacteriia	__Flavobacteriales	__Cryomorphaceae	__Vicingus	__Vicingus serpentipes	1	1	NR_159281.1	NA	NA	0	0	0	0	0	0	0	3	0	0	0	0	0	0	0
denovo676	Bacteria; __Proteobacteria; __Alphaproteobacteria; __Rhodospirillales; __Rhodospirillaceae; __Aestuariispira; __Aestuariispira insulae	Bacteria	__Proteobacteria	__Alphaproteobacteria	__Rhodospirillales	__Rhodospirillaceae	__Aestuariispira	__Aestuariispira insulae	1	1	NR_133689.1	NA	NA	0	0	0	0	0	0	0	0	0	0	0	0	3	0	0
denovo677	Bacteria; __Proteobacteria; __Gammaproteobacteria; __Oceanospirillales; __Oceanospirillaceae; __Oceanobacter; __Oceanobacter kriegii	Bacteria	__Proteobacteria	__Gammaproteobacteria	__Oceanospirillales	__Oceanospirillaceae	__Oceanobacter	__Oceanobacter kriegii	1	1	NR_113758.1	NA	NA	0	0	0	3	0	0	0	0	0	0	0	3	0	0	0
denovo678	; __; __; __; __; __; __		__	__	__	__	__	__	1	1	NA	NA	NA	0	0	0	0	0	0	0	0	0	0	0	0	3	0	0
denovo679	Bacteria; __Bacteroidetes; __Bacteroidia; __Bacteroidales; __Rikenellaceae; __Alistipes; __Alistipes onderdonkii	Bacteria	__Bacteroidetes	__Bacteroidia	__Bacteroidales	__Rikenellaceae	__Alistipes	__Alistipes onderdonkii	1	1	NR_113151.1	NA	NA	0	0	0	0	0	0	0	0	0	0	0	0	0	0	6
denovo680	Bacteria; __Bacteroidetes; __Flavobacteriia; __Flavobacteriales; __Crocinitomicaceae; __Salinirepens; __Salinirepens amamiensis	Bacteria	__Bacteroidetes	__Flavobacteriia	__Flavobacteriales	__Crocinitomicaceae	__Salinirepens	__Salinirepens amamiensis	1	1	NR_112980.1	NA	NA	0	0	3	0	0	0	0	0	0	0	0	0	0	0	0
denovo681	Bacteria; __Proteobacteria; __Alphaproteobacteria; __Pelagibacterales; __Pelagibacteraceae; __Candidatus Pelagibacter; __Candidatus Pelagibacter ubique	Bacteria	__Proteobacteria	__Alphaproteobacteria	__Pelagibacterales	__Pelagibacteraceae	__Candidatus Pelagibacter	__Candidatus Pelagibacter ubique	1	1	NR_074224.1	NA	NA	0	0	0	0	0	0	0	0	0	0	0	0	0	3	0
denovo682	Bacteria; __Proteobacteria; __Alphaproteobacteria; __Rhodospirillales; __Rhodospirillaceae; __Oceanibaculum; __Oceanibaculum nanhaiense	Bacteria	__Proteobacteria	__Alphaproteobacteria	__Rhodospirillales	__Rhodospirillaceae	__Oceanibaculum	__Oceanibaculum nanhaiense	1	1	NR_159190.1	NA	NA	0	0	0	0	0	0	0	0	0	0	3	0	0	0	0
denovo683	Bacteria; __Proteobacteria; __Alphaproteobacteria; __Rhodobacterales; __Rhodobacteraceae; __Marivita; __Marivita lacus	Bacteria	__Proteobacteria	__Alphaproteobacteria	__Rhodobacterales	__Rhodobacteraceae	__Marivita	__Marivita lacus	1	1	NR_135884.1	NA	NA	0	0	0	0	0	3	0	0	0	0	0	0	0	0	0
denovo684	Bacteria; __Bacteroidetes; __Flavobacteriia; __Flavobacteriales; __Crocinitomicaceae; __Salinirepens; __Salinirepens amamiensis	Bacteria	__Bacteroidetes	__Flavobacteriia	__Flavobacteriales	__Crocinitomicaceae	__Salinirepens	__Salinirepens amamiensis	1	1	NR_112980.1	NA	NA	0	0	0	0	0	0	0	0	0	5	1	0	0	0	0
denovo685	Bacteria; __Proteobacteria; __Gammaproteobacteria; __Chromatiales; __; __Thiohalobacter; __Thiohalobacter thiocyanaticus	Bacteria	__Proteobacteria	__Gammaproteobacteria	__Chromatiales	__	__Thiohalobacter	__Thiohalobacter thiocyanaticus	1	1	NR_116699.1	NA	NA	0	0	2	0	0	0	0	0	0	0	0	0	0	1	0
denovo686	; __; __; __; __; __; __		__	__	__	__	__	__	1	1	NA	NA	NA	0	0	0	0	0	0	0	0	0	3	0	0	0	0	0
denovo687	; __; __; __; __; __; __		__	__	__	__	__	__	1	1	NA	NA	NA	0	0	0	0	0	0	0	0	0	0	0	0	0	0	6
denovo688	Bacteria; __Actinobacteria; __Actinobacteria; __Micrococcales; __Intrasporangiaceae; __Tetrasphaera; __Knoellia remsis	Bacteria	__Actinobacteria	__Actinobacteria	__Micrococcales	__Intrasporangiaceae	__Tetrasphaera	__Knoellia remsis	1	1	NR_104693.1	NA	NA	0	0	0	0	0	0	0	0	0	0	0	0	0	1	20
denovo689	; __; __; __; __; __; __		__	__	__	__	__	__	1	1	NA	NA	NA	0	0	3	0	0	0	0	0	0	0	0	0	0	0	0
denovo690	Bacteria; __Cyanobacteria; __; __Nostocales; __Calotrichaceae; __Dulcicalothrix; __Dulcicalothrix necridiiformans	Bacteria	__Cyanobacteria	__	__Nostocales	__Calotrichaceae	__Dulcicalothrix	__Dulcicalothrix necridiiformans	1	1	NR_164867.1	NA	NA	0	0	0	0	0	0	0	0	0	0	3	0	0	3	0
denovo691	Bacteria; __Bacteroidetes; __Chitinophagia; __Chitinophagales; __Chitinophagaceae; __Sediminibacterium; __Sediminibacterium goheungense	Bacteria	__Bacteroidetes	__Chitinophagia	__Chitinophagales	__Chitinophagaceae	__Sediminibacterium	__Sediminibacterium goheungense	1	1	NR_133854.1	NA	NA	0	0	0	0	0	0	0	0	0	0	0	0	0	0	24
denovo692	Bacteria; __Bacteroidetes; __Flavobacteriia; __Flavobacteriales; __Flavobacteriaceae; __Algibacter; __Algibacter lectus	Bacteria	__Bacteroidetes	__Flavobacteriia	__Flavobacteriales	__Flavobacteriaceae	__Algibacter	__Algibacter lectus	1	1	NR_025696.1	NA	NA	2	0	0	2	3	0	1	0	1	0	0	0	0	0	0
denovo693	Bacteria; __Bacteroidetes; __Flavobacteriia; __Flavobacteriales; __Cryomorphaceae; __Vicingus; __Vicingus serpentipes	Bacteria	__Bacteroidetes	__Flavobacteriia	__Flavobacteriales	__Cryomorphaceae	__Vicingus	__Vicingus serpentipes	1	1	NR_159281.1	NA	NA	0	0	0	0	0	0	0	0	0	0	0	3	0	0	0
denovo694	Bacteria; __Proteobacteria; __Oligoflexia; __Bacteriovoracales; __Bacteriovoracaceae; __Bacteriovorax; __Bacteriovorax stolpii	Bacteria	__Proteobacteria	__Oligoflexia	__Bacteriovoracales	__Bacteriovoracaceae	__Bacteriovorax	__Bacteriovorax stolpii	1	1	NR_042023.1	NA	NA	0	2	0	0	1	0	0	0	0	0	0	0	0	0	0
denovo695	Bacteria; __Firmicutes; __Tissierellia; __Tissierellales; __Gottschalkiaceae; __Andreesenia; __Andreesenia angusta	Bacteria	__Firmicutes	__Tissierellia	__Tissierellales	__Gottschalkiaceae	__Andreesenia	__Andreesenia angusta	1	1	NR_044642.2	NA	NA	0	0	0	0	0	0	0	0	0	0	0	0	0	0	3
denovo696	Bacteria; __Proteobacteria; __Deltaproteobacteria; __Desulfuromonadales; __Geobacteraceae; __Geoalkalibacter; __Geoalkalibacter ferrihydriticus	Bacteria	__Proteobacteria	__Deltaproteobacteria	__Desulfuromonadales	__Geobacteraceae	__Geoalkalibacter	__Geoalkalibacter ferrihydriticus	1	1	NR_043709.1	NA	NA	0	0	0	0	0	3	0	0	0	0	0	0	0	0	0
denovo697	Bacteria; __Bacteroidetes; __Chitinophagia; __Chitinophagales; __Chitinophagaceae; __Ferruginibacter; __Ferruginibacter profundus	Bacteria	__Bacteroidetes	__Chitinophagia	__Chitinophagales	__Chitinophagaceae	__Ferruginibacter	__Ferruginibacter profundus	1	1	NR_148259.1	NA	NA	0	0	0	0	0	0	0	0	0	0	0	0	0	0	3
denovo698	; __; __; __; __; __; __		__	__	__	__	__	__	1	1	NA	NA	NA	0	0	0	0	3	0	0	0	0	0	0	0	0	0	0
denovo699	Bacteria; __Planctomycetes; __Planctomycetia; __Pirellulales; __Pirellulaceae; __Rubripirellula; __Rubripirellula obstinata	Bacteria	__Planctomycetes	__Planctomycetia	__Pirellulales	__Pirellulaceae	__Rubripirellula	__Rubripirellula obstinata	1	1	NR_146677.1	NA	NA	0	0	7	0	0	1	0	0	1	0	0	0	0	0	0
denovo700	; __; __; __; __; __; __		__	__	__	__	__	__	1	1	NA	NA	NA	0	0	3	0	0	0	0	0	0	0	0	0	0	0	0
denovo701	Bacteria; __Proteobacteria; __Gammaproteobacteria; __Pseudomonadales; __Pseudomonadaceae; __Pseudomonas; __Pseudomonas sabulinigri	Bacteria	__Proteobacteria	__Gammaproteobacteria	__Pseudomonadales	__Pseudomonadaceae	__Pseudomonas	__Pseudomonas sabulinigri	1	1	NR_044415.1	NA	NA	0	0	2	0	0	2	0	1	0	0	0	0	0	1	0
denovo702	; __; __; __; __; __; __		__	__	__	__	__	__	1	1	NA	NA	NA	0	0	0	0	0	0	0	0	0	0	0	0	0	3	0
denovo703	Bacteria; __Proteobacteria; __Betaproteobacteria; __Nitrosomonadales; __Sterolibacteriaceae; __Methyloversatilis; __Methyloversatilis universalis	Bacteria	__Proteobacteria	__Betaproteobacteria	__Nitrosomonadales	__Sterolibacteriaceae	__Methyloversatilis	__Methyloversatilis universalis	1	1	NR_043813.1	NA	NA	0	0	0	0	0	0	0	0	0	0	0	0	0	0	6
denovo704	Bacteria; __Proteobacteria; __Alphaproteobacteria; __Rhizobiales; __; __Methyloligella; __Methyloligella solikamskensis	Bacteria	__Proteobacteria	__Alphaproteobacteria	__Rhizobiales	__	__Methyloligella	__Methyloligella solikamskensis	1	1	NR_125614.1	NA	NA	0	0	0	0	0	0	0	0	0	0	0	0	0	3	0
denovo705	Bacteria; __Chloroflexi; __Dehalococcoidia; __; __; __Dehalogenimonas; __Dehalogenimonas lykanthroporepellens	Bacteria	__Chloroflexi	__Dehalococcoidia	__	__	__Dehalogenimonas	__Dehalogenimonas lykanthroporepellens	1	1	NR_074337.1	NA	NA	0	0	0	0	0	0	0	0	3	0	0	0	0	0	0
denovo706	Bacteria; __Bacteroidetes; __Flavobacteriia; __Flavobacteriales; __Flavobacteriaceae; __Polaribacter; __Polaribacter litorisediminis	Bacteria	__Bacteroidetes	__Flavobacteriia	__Flavobacteriales	__Flavobacteriaceae	__Polaribacter	__Polaribacter litorisediminis	1	1	NR_156971.1	NA	NA	0	0	3	0	0	0	0	6	0	0	0	0	0	0	0
denovo707	Bacteria; __Actinobacteria; __Actinobacteria; __Actinomycetales; __Actinomycetaceae; __Actinomyces; __Actinomyces viscosus	Bacteria	__Actinobacteria	__Actinobacteria	__Actinomycetales	__Actinomycetaceae	__Actinomyces	__Actinomyces viscosus	1	1	NR_113030.1	NA	NA	0	0	0	0	0	0	0	0	0	0	0	0	0	0	3
denovo708	Bacteria; __Verrucomicrobia; __Verrucomicrobiae; __Verrucomicrobiales; __Rubritaleaceae; __Rubritalea; __Rubritalea marina	Bacteria	__Verrucomicrobia	__Verrucomicrobiae	__Verrucomicrobiales	__Rubritaleaceae	__Rubritalea	__Rubritalea marina	1	1	NR_043701.1	NA	NA	0	0	3	0	0	0	0	0	0	0	0	0	0	0	0
denovo709	Bacteria; __Proteobacteria; __Alphaproteobacteria; __Rickettsiales; __Rickettsiaceae; __Rickettsia; __Rickettsia sibirica	Bacteria	__Proteobacteria	__Alphaproteobacteria	__Rickettsiales	__Rickettsiaceae	__Rickettsia	__Rickettsia sibirica	1	1	NR_036848.1	NA	NA	0	0	0	0	0	0	0	0	0	0	3	0	0	0	0
denovo710	Bacteria; __Bacteroidetes; __Flavobacteriia; __Flavobacteriales; __Cryomorphaceae; __Vicingus; __Vicingus serpentipes	Bacteria	__Bacteroidetes	__Flavobacteriia	__Flavobacteriales	__Cryomorphaceae	__Vicingus	__Vicingus serpentipes	1	1	NR_159281.1	NA	NA	0	0	0	0	3	0	0	0	0	0	0	0	0	0	0
denovo711	; __; __; __; __; __; __		__	__	__	__	__	__	1	1	NA	NA	NA	0	0	0	0	0	0	0	0	0	0	0	0	0	0	3
denovo712	Bacteria; __Proteobacteria; __Gammaproteobacteria; __Thiotrichales; __Thiotrichaceae; __Thiothrix; __Thiothrix fructosivorans	Bacteria	__Proteobacteria	__Gammaproteobacteria	__Thiotrichales	__Thiotrichaceae	__Thiothrix	__Thiothrix fructosivorans	1	1	NR_104845.1	NA	NA	0	0	0	0	0	0	0	0	3	0	0	0	0	0	0
denovo713	Bacteria; __Bacteroidetes; __Flavobacteriia; __Flavobacteriales; __Flavobacteriaceae; __Polaribacter; __Polaribacter staleyi	Bacteria	__Bacteroidetes	__Flavobacteriia	__Flavobacteriales	__Flavobacteriaceae	__Polaribacter	__Polaribacter staleyi	1	1	NR_159336.1	NA	NA	0	0	0	0	0	3	0	0	0	0	0	0	0	0	0
denovo714	Bacteria; __Actinobacteria; __Actinobacteria; __Nakamurellales; __Nakamurellaceae; __Nakamurella; __Nakamurella flavida	Bacteria	__Actinobacteria	__Actinobacteria	__Nakamurellales	__Nakamurellaceae	__Nakamurella	__Nakamurella flavida	1	1	NR_043717.1	NA	NA	3	0	0	0	0	0	0	0	0	0	0	0	0	0	0
denovo715	Bacteria; __Proteobacteria; __Gammaproteobacteria; __Cellvibrionales; __Porticoccaceae; __Porticoccus; __Porticoccus hydrocarbonoclasticus	Bacteria	__Proteobacteria	__Gammaproteobacteria	__Cellvibrionales	__Porticoccaceae	__Porticoccus	__Porticoccus hydrocarbonoclasticus	1	1	NR_118247.1	NA	NA	0	0	0	0	0	0	0	0	0	0	0	3	0	0	0
denovo716	Bacteria; __Proteobacteria; __Gammaproteobacteria; __Alteromonadales; __Colwelliaceae; __Colwellia; __Colwellia asteriadis	Bacteria	__Proteobacteria	__Gammaproteobacteria	__Alteromonadales	__Colwelliaceae	__Colwellia	__Colwellia asteriadis	1	1	NR_116385.1	NA	NA	0	0	0	0	3	0	0	0	0	0	0	0	0	0	0
denovo717	Bacteria; __Proteobacteria; __Gammaproteobacteria; __Oceanospirillales; __Oceanospirillaceae; __Oceaniserpentilla; __Oceaniserpentilla haliotis	Bacteria	__Proteobacteria	__Gammaproteobacteria	__Oceanospirillales	__Oceanospirillaceae	__Oceaniserpentilla	__Oceaniserpentilla haliotis	1	1	NR_042641.1	NA	NA	3	0	0	0	0	0	0	0	0	0	0	0	0	0	0
denovo718	Bacteria; __Bacteroidetes; __Flavobacteriia; __Flavobacteriales; __Flavobacteriaceae; __Gramella; __Gramella antarctica	Bacteria	__Bacteroidetes	__Flavobacteriia	__Flavobacteriales	__Flavobacteriaceae	__Gramella	__Gramella antarctica	1	1	NR_159282.1	NA	NA	0	0	0	0	0	0	0	0	0	0	3	0	0	0	0
denovo719	; __; __; __; __; __; __		__	__	__	__	__	__	1	1	NA	NA	NA	0	3	0	0	0	0	0	0	0	0	0	0	0	0	0
denovo720	Bacteria; __Bacteroidetes; __Flavobacteriia; __Flavobacteriales; __Flavobacteriaceae; __Sediminicola; __Sediminicola luteus	Bacteria	__Bacteroidetes	__Flavobacteriia	__Flavobacteriales	__Flavobacteriaceae	__Sediminicola	__Sediminicola luteus	1	1	NR_113965.1	NA	NA	0	0	0	0	0	0	0	6	0	0	0	0	0	0	0
denovo721	Bacteria; __Bacteroidetes; __Saprospiria; __Saprospirales; __Haliscomenobacteraceae; __Haliscomenobacter; __Haliscomenobacter hydrossis	Bacteria	__Bacteroidetes	__Saprospiria	__Saprospirales	__Haliscomenobacteraceae	__Haliscomenobacter	__Haliscomenobacter hydrossis	1	1	NR_074420.1	NA	NA	0	0	0	3	0	0	0	0	0	0	0	0	0	0	0
denovo722	Bacteria; __Bacteroidetes; __Flavobacteriia; __Flavobacteriales; __Cryomorphaceae; __Vicingus; __Vicingus serpentipes	Bacteria	__Bacteroidetes	__Flavobacteriia	__Flavobacteriales	__Cryomorphaceae	__Vicingus	__Vicingus serpentipes	1	1	NR_159281.1	NA	NA	0	0	0	0	0	0	0	3	0	0	0	0	0	0	0
denovo723	Bacteria; __Proteobacteria; __Gammaproteobacteria; __Chromatiales; __Chromatiaceae; __Pararheinheimera; __Pararheinheimera arenilitoris	Bacteria	__Proteobacteria	__Gammaproteobacteria	__Chromatiales	__Chromatiaceae	__Pararheinheimera	__Pararheinheimera arenilitoris	1	1	NR_134151.1	NA	NA	0	0	2	0	0	0	0	0	0	0	1	0	0	0	0
denovo724	Bacteria; __Verrucomicrobia; __Verrucomicrobiae; __Verrucomicrobiales; __Verrucomicrobiaceae; __Fucophilus; __Fucophilus fucoidanolyticus	Bacteria	__Verrucomicrobia	__Verrucomicrobiae	__Verrucomicrobiales	__Verrucomicrobiaceae	__Fucophilus	__Fucophilus fucoidanolyticus	1	1	NR_112167.1	NA	NA	0	0	0	0	0	0	0	0	0	3	0	0	0	0	0
denovo725	Bacteria; __Firmicutes; __Bacilli; __Bacillales; __Bacillaceae; __Oceanobacillus; __Oceanobacillus picturae	Bacteria	__Firmicutes	__Bacilli	__Bacillales	__Bacillaceae	__Oceanobacillus	__Oceanobacillus picturae	1	1	NR_028952.1	NA	NA	0	0	0	0	0	0	0	0	0	0	0	0	0	0	3
denovo726	Bacteria; __Verrucomicrobia; __Opitutae; __Opitutales; __Opitutaceae; __Opitutus; __Opitutus terrae	Bacteria	__Verrucomicrobia	__Opitutae	__Opitutales	__Opitutaceae	__Opitutus	__Opitutus terrae	1	1	NR_074978.1	NA	NA	0	0	0	0	0	0	0	0	0	0	0	0	0	0	6
denovo727	Bacteria; __Proteobacteria; __Alphaproteobacteria; __Rhodospirillales; __Rhodospirillaceae; __Ferruginivarius; __Ferruginivarius sediminum	Bacteria	__Proteobacteria	__Alphaproteobacteria	__Rhodospirillales	__Rhodospirillaceae	__Ferruginivarius	__Ferruginivarius sediminum	1	1	NR_165004.1	NA	NA	0	0	1	0	0	11	0	0	0	0	0	0	0	3	0
denovo728	Bacteria; __Bacteroidetes; __Flavobacteriia; __Flavobacteriales; __Flavobacteriaceae; __Polaribacter; __Polaribacter marinaquae	Bacteria	__Bacteroidetes	__Flavobacteriia	__Flavobacteriales	__Flavobacteriaceae	__Polaribacter	__Polaribacter marinaquae	1	1	NR_152672.1	NA	NA	0	0	0	0	3	0	0	0	0	0	0	0	0	0	0
denovo729	Bacteria; __Proteobacteria; __Alphaproteobacteria; __Caulobacterales; __Caulobacteraceae; __Asticcacaulis; __Asticcacaulis endophyticus	Bacteria	__Proteobacteria	__Alphaproteobacteria	__Caulobacterales	__Caulobacteraceae	__Asticcacaulis	__Asticcacaulis endophyticus	1	1	NR_133971.1	NA	NA	0	0	0	0	0	0	0	0	0	0	0	0	0	3	0
denovo730	; __; __; __; __; __; __		__	__	__	__	__	__	1	1	NA	NA	NA	0	1	1	0	0	0	0	0	1	0	0	0	0	0	0
denovo731	; __; __; __; __; __; __		__	__	__	__	__	__	1	1	NA	NA	NA	0	0	0	0	0	0	0	0	0	3	0	0	0	0	0
denovo732	Bacteria; __Bacteroidetes; __Flavobacteriia; __Flavobacteriales; __Cryomorphaceae; __Vicingus; __Vicingus serpentipes	Bacteria	__Bacteroidetes	__Flavobacteriia	__Flavobacteriales	__Cryomorphaceae	__Vicingus	__Vicingus serpentipes	1	1	NR_159281.1	NA	NA	0	0	3	0	0	0	0	0	0	0	0	0	0	0	0
denovo733	Bacteria; __Cyanobacteria; __; __Nostocales; __Calotrichaceae; __Dulcicalothrix; __Dulcicalothrix necridiiformans	Bacteria	__Cyanobacteria	__	__Nostocales	__Calotrichaceae	__Dulcicalothrix	__Dulcicalothrix necridiiformans	1	1	NR_164867.1	NA	NA	0	0	0	3	0	0	0	0	0	0	0	0	0	0	0
denovo734	Bacteria; __Proteobacteria; __Alphaproteobacteria; __Rhodospirillales; __Rhodospirillaceae; __Ferruginivarius; __Ferruginivarius sediminum	Bacteria	__Proteobacteria	__Alphaproteobacteria	__Rhodospirillales	__Rhodospirillaceae	__Ferruginivarius	__Ferruginivarius sediminum	1	1	NR_165004.1	NA	NA	0	0	3	0	0	0	0	0	0	0	0	0	0	0	0
denovo735	; __; __; __; __; __; __		__	__	__	__	__	__	1	1	NA	NA	NA	0	0	1	0	0	1	0	0	0	0	0	0	0	1	0
denovo736	Bacteria; __Bacteroidetes; __Flavobacteriia; __Flavobacteriales; __Cryomorphaceae; __Vicingus; __Vicingus serpentipes	Bacteria	__Bacteroidetes	__Flavobacteriia	__Flavobacteriales	__Cryomorphaceae	__Vicingus	__Vicingus serpentipes	1	1	NR_159281.1	NA	NA	0	0	0	0	0	0	0	0	0	0	0	0	3	0	0
denovo737	; __; __; __; __; __; __		__	__	__	__	__	__	1	1	NA	NA	NA	0	0	0	0	0	0	0	0	0	0	3	0	3	0	0
denovo738	; __; __; __; __; __; __		__	__	__	__	__	__	1	1	NA	NA	NA	0	0	0	0	0	0	0	0	0	0	0	0	0	0	6
denovo739	Bacteria; __Proteobacteria; __Gammaproteobacteria; __Alteromonadales; __Pseudoalteromonadaceae; __Pseudoalteromonas; __Pseudoalteromonas denitrificans	Bacteria	__Proteobacteria	__Gammaproteobacteria	__Alteromonadales	__Pseudoalteromonadaceae	__Pseudoalteromonas	__Pseudoalteromonas denitrificans	1	1	NR_044866.1	NA	NA	0	0	3	0	0	0	0	0	0	0	0	0	0	0	0
denovo740	Bacteria; __Bacteroidetes; __Flavobacteriia; __Flavobacteriales; __Flavobacteriaceae; __Lutibacter; __Lutibacter profundi	Bacteria	__Bacteroidetes	__Flavobacteriia	__Flavobacteriales	__Flavobacteriaceae	__Lutibacter	__Lutibacter profundi	1	1	NR_149758.1	NA	NA	0	0	0	0	0	0	0	0	0	3	0	0	0	0	0
denovo741	; __; __; __; __; __; __		__	__	__	__	__	__	1	1	NA	NA	NA	0	0	0	0	0	0	0	0	0	0	0	1	2	0	0
denovo742	Bacteria; __Proteobacteria; __Alphaproteobacteria; __Rhodobacterales; __Rhodobacteraceae; __Rhodovulum; __Rhodovulum kholense	Bacteria	__Proteobacteria	__Alphaproteobacteria	__Rhodobacterales	__Rhodobacteraceae	__Rhodovulum	__Rhodovulum kholense	1	1	NR_042645.1	NA	NA	0	0	3	0	0	0	0	0	0	0	0	0	0	3	0
denovo743	Bacteria; __Verrucomicrobia; __Verrucomicrobiae; __Verrucomicrobiales; __Rubritaleaceae; __Rubritalea; __Rubritalea profundi	Bacteria	__Verrucomicrobia	__Verrucomicrobiae	__Verrucomicrobiales	__Rubritaleaceae	__Rubritalea	__Rubritalea profundi	1	1	NR_163649.1	NA	NA	0	0	0	0	0	3	0	0	3	0	0	0	0	0	0
denovo744	Bacteria; __Firmicutes; __Clostridia; __Clostridiales; __Syntrophomonadaceae; __Dethiobacter; __Dethiobacter alkaliphilus	Bacteria	__Firmicutes	__Clostridia	__Clostridiales	__Syntrophomonadaceae	__Dethiobacter	__Dethiobacter alkaliphilus	1	1	NR_044205.1	NA	NA	0	0	0	0	0	0	0	0	0	0	0	0	0	6	0
denovo745	; __; __; __; __; __; __		__	__	__	__	__	__	1	1	NA	NA	NA	0	0	0	0	0	0	0	0	0	3	0	0	0	0	0
denovo746	Bacteria; __Actinobacteria; __Acidimicrobiia; __Acidimicrobiales; __Acidimicrobiaceae; __Aciditerrimonas; __Aciditerrimonas ferrireducens	Bacteria	__Actinobacteria	__Acidimicrobiia	__Acidimicrobiales	__Acidimicrobiaceae	__Aciditerrimonas	__Aciditerrimonas ferrireducens	1	1	NR_112972.1	NA	NA	0	0	0	0	0	0	0	0	0	0	0	0	0	3	0
denovo747	Bacteria; __Proteobacteria; __Alphaproteobacteria; __Sphingomonadales; __Erythrobacteraceae; __Porphyrobacter; __Porphyrobacter colymbi	Bacteria	__Proteobacteria	__Alphaproteobacteria	__Sphingomonadales	__Erythrobacteraceae	__Porphyrobacter	__Porphyrobacter colymbi	1	1	NR_114328.1	NA	NA	0	0	0	0	0	0	0	0	0	0	0	0	0	0	3
denovo748	Bacteria; __Proteobacteria; __Gammaproteobacteria; __Legionellales; __Legionellaceae; __Legionella; __Legionella geestiana	Bacteria	__Proteobacteria	__Gammaproteobacteria	__Legionellales	__Legionellaceae	__Legionella	__Legionella geestiana	1	1	NR_044957.1	NA	NA	0	0	0	0	3	0	0	0	0	0	0	0	0	0	0
denovo749	Bacteria; __Bacteroidetes; __Flavobacteriia; __Flavobacteriales; __Flavobacteriaceae; __Frondibacter; __Frondibacter aureus	Bacteria	__Bacteroidetes	__Flavobacteriia	__Flavobacteriales	__Flavobacteriaceae	__Frondibacter	__Frondibacter aureus	1	1	NR_134733.1	NA	NA	0	0	0	0	0	0	0	0	0	3	0	0	0	0	0
denovo750	Bacteria; __Bacteroidetes; __Cytophagia; __Cytophagales; __Cyclobacteriaceae; __Algoriphagus; __Algoriphagus winogradskyi	Bacteria	__Bacteroidetes	__Cytophagia	__Cytophagales	__Cyclobacteriaceae	__Algoriphagus	__Algoriphagus winogradskyi	1	1	NR_025601.1	NA	NA	1	2	0	0	0	0	0	0	0	0	0	0	0	0	0
denovo751	Bacteria; __Proteobacteria; __Gammaproteobacteria; __Cellvibrionales; __Microbulbiferaceae; __Microbulbifer; __Microbulbifer aestuariivivens	Bacteria	__Proteobacteria	__Gammaproteobacteria	__Cellvibrionales	__Microbulbiferaceae	__Microbulbifer	__Microbulbifer aestuariivivens	1	1	NR_156942.1	NA	NA	0	0	0	0	1	0	2	0	0	0	0	0	0	0	0
denovo752	Bacteria; __Bacteroidetes; __Flavobacteriia; __Flavobacteriales; __Flavobacteriaceae; __Tenacibaculum; __Tenacibaculum aestuariivivum	Bacteria	__Bacteroidetes	__Flavobacteriia	__Flavobacteriales	__Flavobacteriaceae	__Tenacibaculum	__Tenacibaculum aestuariivivum	1	1	NR_159126.1	NA	NA	0	0	0	0	3	3	0	0	0	0	0	0	0	0	0
denovo753	Bacteria; __Proteobacteria; __Gammaproteobacteria; __Alteromonadales; __Alteromonadaceae; __Paraglaciecola; __Paraglaciecola psychrophila	Bacteria	__Proteobacteria	__Gammaproteobacteria	__Alteromonadales	__Alteromonadaceae	__Paraglaciecola	__Paraglaciecola psychrophila	1	1	NR_043463.1	NA	NA	3	0	0	0	0	0	3	0	0	0	0	0	0	0	0
denovo754	Bacteria; __Proteobacteria; __Betaproteobacteria; __Burkholderiales; __Alcaligenaceae; __Achromobacter; __Achromobacter panacis	Bacteria	__Proteobacteria	__Betaproteobacteria	__Burkholderiales	__Alcaligenaceae	__Achromobacter	__Achromobacter panacis	1	1	NR_165687.1	NA	NA	0	0	0	0	0	0	0	0	0	0	0	0	0	0	12
denovo755	Bacteria; __Bacteroidetes; __Flavobacteriia; __Flavobacteriales; __Flavobacteriaceae; __Polaribacter; __Polaribacter franzmannii	Bacteria	__Bacteroidetes	__Flavobacteriia	__Flavobacteriales	__Flavobacteriaceae	__Polaribacter	__Polaribacter franzmannii	1	1	NR_025959.1	NA	NA	0	0	0	0	0	0	0	3	0	0	0	0	0	0	0
denovo756	Bacteria; __Proteobacteria; __Gammaproteobacteria; __Alteromonadales; __Alteromonadaceae; __Aliiglaciecola; __Aliiglaciecola lipolytica	Bacteria	__Proteobacteria	__Gammaproteobacteria	__Alteromonadales	__Alteromonadaceae	__Aliiglaciecola	__Aliiglaciecola lipolytica	1	1	NR_044430.1	NA	NA	0	0	0	0	0	3	0	0	0	0	0	0	0	0	0
denovo757	Bacteria; __Bacteroidetes; __Cytophagia; __Cytophagales; __Hymenobacteraceae; __Pontibacter; __Pontibacter rugosus	Bacteria	__Bacteroidetes	__Cytophagia	__Cytophagales	__Hymenobacteraceae	__Pontibacter	__Pontibacter rugosus	1	1	NR_152663.1	NA	NA	3	0	0	0	0	0	0	0	0	0	0	0	0	0	0
denovo758	Bacteria; __Proteobacteria; __Gammaproteobacteria; __; __; __Sedimenticola; __Sedimenticola thiotaurini	Bacteria	__Proteobacteria	__Gammaproteobacteria	__	__	__Sedimenticola	__Sedimenticola thiotaurini	1	1	NR_136790.1	NA	NA	0	0	0	0	0	0	0	0	0	0	0	0	0	3	0
denovo759	Bacteria; __Bacteroidetes; __Flavobacteriia; __Flavobacteriales; __Flavobacteriaceae; __Formosa; __Formosa undariae	Bacteria	__Bacteroidetes	__Flavobacteriia	__Flavobacteriales	__Flavobacteriaceae	__Formosa	__Formosa undariae	1	1	NR_109753.1	NA	NA	3	0	0	0	0	0	0	0	0	0	0	0	0	0	0
denovo760	Bacteria; __Bacteroidetes; __Flavobacteriia; __Flavobacteriales; __Flavobacteriaceae; __Pseudofulvibacter; __Pseudofulvibacter gastropodicola	Bacteria	__Bacteroidetes	__Flavobacteriia	__Flavobacteriales	__Flavobacteriaceae	__Pseudofulvibacter	__Pseudofulvibacter gastropodicola	1	1	NR_147772.1	NA	NA	0	0	0	0	0	0	0	0	0	0	0	0	3	0	0
denovo761	Bacteria; __Bacteroidetes; __Flavobacteriia; __Flavobacteriales; __Flavobacteriaceae; __Polaribacter; __Polaribacter staleyi	Bacteria	__Bacteroidetes	__Flavobacteriia	__Flavobacteriales	__Flavobacteriaceae	__Polaribacter	__Polaribacter staleyi	1	1	NR_159336.1	NA	NA	0	0	0	3	0	3	0	3	0	0	0	0	0	0	0
denovo762	Bacteria; __Cyanobacteria; __; __Pleurocapsales; __Dermocarpellaceae; __Stanieria; __Stanieria cyanosphaera	Bacteria	__Cyanobacteria	__	__Pleurocapsales	__Dermocarpellaceae	__Stanieria	__Stanieria cyanosphaera	1	1	NR_102468.1	NA	NA	0	0	0	0	0	0	0	0	0	2	0	1	0	0	0
denovo763	; __; __; __; __; __; __		__	__	__	__	__	__	1	1	NA	NA	NA	0	8	0	0	0	1	0	0	0	0	0	0	0	3	0
denovo764	Bacteria; __Proteobacteria; __Gammaproteobacteria; __Cellvibrionales; __Microbulbiferaceae; __Microbulbifer; __Microbulbifer mangrovi	Bacteria	__Proteobacteria	__Gammaproteobacteria	__Cellvibrionales	__Microbulbiferaceae	__Microbulbifer	__Microbulbifer mangrovi	1	1	NR_109105.1	NA	NA	0	0	0	0	3	0	0	0	0	0	0	0	0	0	0
denovo765	; __; __; __; __; __; __		__	__	__	__	__	__	1	1	NA	NA	NA	0	0	0	0	0	0	0	0	0	3	0	0	0	0	0
denovo766	Bacteria; __Verrucomicrobia; __Verrucomicrobiae; __Verrucomicrobiales; __Verrucomicrobiaceae; __Fucophilus; __Fucophilus fucoidanolyticus	Bacteria	__Verrucomicrobia	__Verrucomicrobiae	__Verrucomicrobiales	__Verrucomicrobiaceae	__Fucophilus	__Fucophilus fucoidanolyticus	1	1	NR_112167.1	NA	NA	0	0	3	0	0	0	0	0	0	0	0	0	0	0	0
denovo767	; __; __; __; __; __; __		__	__	__	__	__	__	1	1	NA	NA	NA	0	0	0	0	0	0	0	0	0	0	0	0	0	3	0
denovo768	Bacteria; __Planctomycetes; __Planctomycetia; __Planctomycetales; __Planctomycetaceae; __Gimesia; __Gimesia maris	Bacteria	__Planctomycetes	__Planctomycetia	__Planctomycetales	__Planctomycetaceae	__Gimesia	__Gimesia maris	1	1	NR_025327.1	NA	NA	0	0	1	0	0	0	0	0	2	0	0	0	0	6	0
denovo769	Bacteria; __Proteobacteria; __Alphaproteobacteria; __Pelagibacterales; __Pelagibacteraceae; __Candidatus Pelagibacter; __Candidatus Pelagibacter ubique	Bacteria	__Proteobacteria	__Alphaproteobacteria	__Pelagibacterales	__Pelagibacteraceae	__Candidatus Pelagibacter	__Candidatus Pelagibacter ubique	1	1	NR_074224.1	NA	NA	0	0	0	0	0	0	0	0	3	0	0	0	0	0	0
denovo770	; __; __; __; __; __; __		__	__	__	__	__	__	1	1	NA	NA	NA	0	0	0	0	0	0	0	0	0	0	0	0	3	0	0
denovo771	Bacteria; __Proteobacteria; __Gammaproteobacteria; __; __; __Pseudohongiella; __Pseudohongiella acticola	Bacteria	__Proteobacteria	__Gammaproteobacteria	__	__	__Pseudohongiella	__Pseudohongiella acticola	1	1	NR_136444.1	NA	NA	0	5	1	0	1	2	0	0	0	0	0	0	0	0	0
denovo772	Bacteria; __Bacteroidetes; __Flavobacteriia; __Flavobacteriales; __Flavobacteriaceae; __Oceanihabitans; __Oceanihabitans sediminis	Bacteria	__Bacteroidetes	__Flavobacteriia	__Flavobacteriales	__Flavobacteriaceae	__Oceanihabitans	__Oceanihabitans sediminis	1	1	NR_151967.1	NA	NA	0	0	0	0	0	0	0	0	0	2	0	0	1	0	0
denovo773	Bacteria; __Proteobacteria; __Alphaproteobacteria; __Rhodobacterales; __Rhodobacteraceae; __Nereida; __Nereida ignava	Bacteria	__Proteobacteria	__Alphaproteobacteria	__Rhodobacterales	__Rhodobacteraceae	__Nereida	__Nereida ignava	1	1	NR_115897.1	NA	NA	0	0	0	3	0	0	0	0	0	0	0	0	0	0	0
denovo774	Bacteria; __Verrucomicrobia; __Verrucomicrobiae; __Verrucomicrobiales; __Verrucomicrobia subdivision 3; __Limisphaera; __Limisphaera ngatamarikiensis	Bacteria	__Verrucomicrobia	__Verrucomicrobiae	__Verrucomicrobiales	__Verrucomicrobia subdivision 3	__Limisphaera	__Limisphaera ngatamarikiensis	1	1	NR_134756.1	NA	NA	0	0	0	0	0	0	0	0	0	0	0	0	0	0	15
denovo775	Bacteria; __Bacteroidetes; __Flavobacteriia; __Flavobacteriales; __Cryomorphaceae; __Vicingus; __Vicingus serpentipes	Bacteria	__Bacteroidetes	__Flavobacteriia	__Flavobacteriales	__Cryomorphaceae	__Vicingus	__Vicingus serpentipes	1	1	NR_159281.1	NA	NA	0	0	0	0	0	0	0	0	0	0	0	0	0	3	0
denovo776	Bacteria; __Chloroflexi; __Dehalococcoidia; __; __; __Dehalogenimonas; __Dehalogenimonas lykanthroporepellens	Bacteria	__Chloroflexi	__Dehalococcoidia	__	__	__Dehalogenimonas	__Dehalogenimonas lykanthroporepellens	1	1	NR_044550.1	NA	NA	0	2	0	0	0	0	0	0	0	0	0	0	0	4	0
denovo777	Bacteria; __Proteobacteria; __Deltaproteobacteria; __Desulfobacterales; __Desulfobacteraceae; __Desulforegula; __Desulforegula conservatrix	Bacteria	__Proteobacteria	__Deltaproteobacteria	__Desulfobacterales	__Desulfobacteraceae	__Desulforegula	__Desulforegula conservatrix	1	1	NR_028780.1	NA	NA	0	0	1	0	0	2	0	0	0	0	0	0	0	6	0
denovo778	Bacteria; __Proteobacteria; __Gammaproteobacteria; __Oceanospirillales; __Kangiellaceae; __Kangiella; __Kangiella chungangensis	Bacteria	__Proteobacteria	__Gammaproteobacteria	__Oceanospirillales	__Kangiellaceae	__Kangiella	__Kangiella chungangensis	1	1	NR_148305.1	NA	NA	0	0	0	0	0	0	0	0	0	0	0	0	0	3	0
denovo779	; __; __; __; __; __; __		__	__	__	__	__	__	1	1	NA	NA	NA	0	0	0	0	0	3	0	0	0	0	0	0	0	0	0
denovo780	Bacteria; __Proteobacteria; __Gammaproteobacteria; __Cellvibrionales; __Cellvibrionaceae; __Umboniibacter; __Umboniibacter roseus	Bacteria	__Proteobacteria	__Gammaproteobacteria	__Cellvibrionales	__Cellvibrionaceae	__Umboniibacter	__Umboniibacter roseus	1	1	NR_145653.1	NA	NA	0	0	0	0	0	0	0	0	0	3	0	0	0	0	0
denovo781	Bacteria; __Actinobacteria; __Actinobacteria; __Micrococcales; __Bogoriellaceae; __Georgenia; __Georgenia deserti	Bacteria	__Actinobacteria	__Actinobacteria	__Micrococcales	__Bogoriellaceae	__Georgenia	__Georgenia deserti	1	1	NR_163612.1	NA	NA	0	0	0	0	0	0	0	0	0	0	0	0	0	0	9
denovo782	Bacteria; __Proteobacteria; __Gammaproteobacteria; __Cellvibrionales; __Microbulbiferaceae; __Microbulbifer; __Microbulbifer marinus	Bacteria	__Proteobacteria	__Gammaproteobacteria	__Cellvibrionales	__Microbulbiferaceae	__Microbulbifer	__Microbulbifer marinus	1	1	NR_108573.1	NA	NA	0	2	0	0	0	1	0	0	0	0	0	0	0	0	0
denovo783	Bacteria; __Firmicutes; __Clostridia; __Clostridiales; __Peptostreptococcaceae; __Peptacetobacter; __Peptacetobacter hiranonis	Bacteria	__Firmicutes	__Clostridia	__Clostridiales	__Peptostreptococcaceae	__Peptacetobacter	__Peptacetobacter hiranonis	1	1	NR_028611.1	NA	NA	0	0	0	0	0	0	0	0	0	0	0	0	0	0	3
denovo784	Bacteria; __Bacteroidetes; __Flavobacteriia; __Flavobacteriales; __Cryomorphaceae; __Vicingus; __Vicingus serpentipes	Bacteria	__Bacteroidetes	__Flavobacteriia	__Flavobacteriales	__Cryomorphaceae	__Vicingus	__Vicingus serpentipes	1	1	NR_159281.1	NA	NA	0	0	0	3	0	0	0	0	0	0	0	0	0	0	0
denovo785	Bacteria; __Firmicutes; __Bacilli; __Lactobacillales; __Enterococcaceae; __Vagococcus; __Vagococcus martis	Bacteria	__Firmicutes	__Bacilli	__Lactobacillales	__Enterococcaceae	__Vagococcus	__Vagococcus martis	1	1	NR_158022.1	NA	NA	0	0	0	0	0	0	0	0	0	0	0	0	0	0	6
denovo786	Bacteria; __Bacteroidetes; __Flavobacteriia; __Flavobacteriales; __Flavobacteriaceae; __Algibacter; __Algibacter wandonensis	Bacteria	__Bacteroidetes	__Flavobacteriia	__Flavobacteriales	__Flavobacteriaceae	__Algibacter	__Algibacter wandonensis	1	1	NR_132290.1	NA	NA	0	0	0	0	0	0	0	3	0	0	0	0	0	0	0
denovo787	Bacteria; __Bacteroidetes; __Flavobacteriia; __Flavobacteriales; __Flavobacteriaceae; __Formosa; __Formosa arctica	Bacteria	__Bacteroidetes	__Flavobacteriia	__Flavobacteriales	__Flavobacteriaceae	__Formosa	__Formosa arctica	1	1	NR_125695.1	NA	NA	0	0	0	0	0	0	0	3	0	0	0	0	0	0	0
denovo788	; __; __; __; __; __; __		__	__	__	__	__	__	1	1	NA	NA	NA	0	0	0	0	0	0	0	0	0	0	0	0	0	3	0
denovo789	Bacteria; __Proteobacteria; __Gammaproteobacteria; __Pseudomonadales; __Pseudomonadaceae; __Pseudomonas; __Pseudomonas reidholzensis	Bacteria	__Proteobacteria	__Gammaproteobacteria	__Pseudomonadales	__Pseudomonadaceae	__Pseudomonas	__Pseudomonas reidholzensis	1	1	NR_157777.1	NA	NA	0	0	0	0	0	0	0	3	0	0	0	0	0	0	0
denovo790	Bacteria; __Proteobacteria; __Alphaproteobacteria; __Rhodobacterales; __Rhodobacteraceae; __Octadecabacter; __Octadecabacter arcticus	Bacteria	__Proteobacteria	__Alphaproteobacteria	__Rhodobacterales	__Rhodobacteraceae	__Octadecabacter	__Octadecabacter arcticus	1	1	NR_102905.1	NA	NA	0	0	0	3	0	0	0	0	0	0	0	0	0	0	0
denovo791	Bacteria; __Proteobacteria; __Alphaproteobacteria; __Rhodobacterales; __Rhodobacteraceae; __Halocynthiibacter; __Halocynthiibacter arcticus	Bacteria	__Proteobacteria	__Alphaproteobacteria	__Rhodobacterales	__Rhodobacteraceae	__Halocynthiibacter	__Halocynthiibacter arcticus	1	1	NR_145638.1	NA	NA	1	0	0	0	0	0	1	0	4	0	0	3	0	0	0
denovo792	Bacteria; __Proteobacteria; __Gammaproteobacteria; __Alteromonadales; __Alteromonadaceae; __Paraglaciecola; __Paraglaciecola polaris	Bacteria	__Proteobacteria	__Gammaproteobacteria	__Alteromonadales	__Alteromonadaceae	__Paraglaciecola	__Paraglaciecola polaris	1	1	NR_025427.1	NA	NA	1	0	2	0	0	2	1	0	0	0	0	0	0	0	0
denovo793	Bacteria; __Proteobacteria; __Gammaproteobacteria; __Enterobacterales; __Yersiniaceae; __Rouxiella; __Rouxiella chamberiensis	Bacteria	__Proteobacteria	__Gammaproteobacteria	__Enterobacterales	__Yersiniaceae	__Rouxiella	__Rouxiella chamberiensis	1	1	NR_135871.1	NA	NA	0	0	0	0	0	0	0	0	1	0	0	0	0	0	5
denovo794	Bacteria; __Bacteroidetes; __Flavobacteriia; __Flavobacteriales; __Flavobacteriaceae; __Empedobacter; __Empedobacter falsenii	Bacteria	__Bacteroidetes	__Flavobacteriia	__Flavobacteriales	__Flavobacteriaceae	__Empedobacter	__Empedobacter falsenii	1	1	NR_042430.2	NA	NA	0	0	0	0	0	0	0	0	0	0	0	0	0	0	3
denovo795	Bacteria; __Proteobacteria; __Betaproteobacteria; __Burkholderiales; __Comamonadaceae; __Hydrogenophaga; __Hydrogenophaga intermedia	Bacteria	__Proteobacteria	__Betaproteobacteria	__Burkholderiales	__Comamonadaceae	__Hydrogenophaga	__Hydrogenophaga intermedia	1	1	NR_114129.1	NA	NA	0	2	1	0	1	0	0	1	1	4	2	0	0	0	0
denovo796	Bacteria; __Proteobacteria; __Alphaproteobacteria; __Sphingomonadales; __Sphingomonadaceae; __Sphingomonas; __Sphingomonas lutea	Bacteria	__Proteobacteria	__Alphaproteobacteria	__Sphingomonadales	__Sphingomonadaceae	__Sphingomonas	__Sphingomonas lutea	1	1	NR_153746.1	NA	NA	0	0	0	0	0	0	0	0	0	0	0	0	0	0	6
denovo797	Bacteria; __Proteobacteria; __Gammaproteobacteria; __Pseudomonadales; __Pseudomonadaceae; __Pseudomonas; __Pseudomonas caeni	Bacteria	__Proteobacteria	__Gammaproteobacteria	__Pseudomonadales	__Pseudomonadaceae	__Pseudomonas	__Pseudomonas caeni	1	1	NR_116388.1	NA	NA	0	0	0	0	0	0	0	0	0	0	0	0	0	0	3
denovo798	Bacteria; __Proteobacteria; __Gammaproteobacteria; __Alteromonadales; __Colwelliaceae; __Colwellia; __Colwellia polaris	Bacteria	__Proteobacteria	__Gammaproteobacteria	__Alteromonadales	__Colwelliaceae	__Colwellia	__Colwellia polaris	1	1	NR_043462.1	NA	NA	3	0	0	0	0	0	0	0	0	0	0	0	0	0	0
denovo799	; __; __; __; __; __; __		__	__	__	__	__	__	1	1	NA	NA	NA	0	0	0	0	0	0	0	0	0	0	0	0	0	3	0
denovo800	Bacteria; __Bacteroidetes; __Flavobacteriia; __Flavobacteriales; __Flavobacteriaceae; __Kordia; __Kordia antarctica	Bacteria	__Bacteroidetes	__Flavobacteriia	__Flavobacteriales	__Flavobacteriaceae	__Kordia	__Kordia antarctica	1	1	NR_109682.1	NA	NA	0	0	0	0	0	0	3	0	0	0	0	0	0	0	0
denovo801	Bacteria; __Actinobacteria; __Acidimicrobiia; __Acidimicrobiales; __Iamiaceae; __Iamia; __Iamia majanohamensis	Bacteria	__Actinobacteria	__Acidimicrobiia	__Acidimicrobiales	__Iamiaceae	__Iamia	__Iamia majanohamensis	1	1	NR_041634.1	NA	NA	0	1	1	0	0	3	0	0	1	0	0	0	0	0	0
denovo802	Bacteria; __Proteobacteria; __Alphaproteobacteria; __Rhodobacterales; __Rhodobacteraceae; __Pseudooceanicola; __Pseudooceanicola flagellatus	Bacteria	__Proteobacteria	__Alphaproteobacteria	__Rhodobacterales	__Rhodobacteraceae	__Pseudooceanicola	__Pseudooceanicola flagellatus	1	1	NR_134108.1	NA	NA	0	0	0	0	0	0	0	0	0	0	0	0	0	3	0
denovo803	Bacteria; __Proteobacteria; __Alphaproteobacteria; __Rhodobacterales; __Rhodobacteraceae; __Pacificibacter; __Pacificibacter aestuarii	Bacteria	__Proteobacteria	__Alphaproteobacteria	__Rhodobacterales	__Rhodobacteraceae	__Pacificibacter	__Pacificibacter aestuarii	1	1	NR_158057.1	NA	NA	0	0	0	0	0	0	0	0	0	0	0	0	0	3	0
denovo804	Bacteria; __Bacteroidetes; __Flavobacteriia; __Flavobacteriales; __Flavobacteriaceae; __Tenacibaculum; __Tenacibaculum insulae	Bacteria	__Bacteroidetes	__Flavobacteriia	__Flavobacteriales	__Flavobacteriaceae	__Tenacibaculum	__Tenacibaculum insulae	1	1	NR_159277.1	NA	NA	0	0	0	0	3	0	0	0	0	0	0	0	0	0	0
denovo805	Bacteria; __Proteobacteria; __Alphaproteobacteria; __Rhodobacterales; __Rhodobacteraceae; __Roseobacter; __Roseobacter ponti	Bacteria	__Proteobacteria	__Alphaproteobacteria	__Rhodobacterales	__Rhodobacteraceae	__Roseobacter	__Roseobacter ponti	1	1	NR_157654.1	NA	NA	0	0	0	3	0	0	0	0	0	0	0	0	0	0	0
denovo806	Bacteria; __Proteobacteria; __Alphaproteobacteria; __Sphingomonadales; __Erythrobacteraceae; __Altererythrobacter; __Altererythrobacter ishigakiensis	Bacteria	__Proteobacteria	__Alphaproteobacteria	__Sphingomonadales	__Erythrobacteraceae	__Altererythrobacter	__Altererythrobacter ishigakiensis	1	1	NR_112721.1	NA	NA	1	0	4	0	0	1	0	0	0	0	0	0	0	0	0
denovo807	Bacteria; __Synergistetes; __Synergistia; __Synergistales; __Synergistaceae; __Fretibacterium; __Fretibacterium fastidiosum	Bacteria	__Synergistetes	__Synergistia	__Synergistales	__Synergistaceae	__Fretibacterium	__Fretibacterium fastidiosum	1	1	NR_108538.1	NA	NA	0	0	0	0	0	0	0	0	0	0	0	0	0	0	3
denovo808	Bacteria; __Proteobacteria; __Alphaproteobacteria; __Rhodospirillales; __Rhodospirillaceae; __Elstera; __Elstera cyanobacteriorum	Bacteria	__Proteobacteria	__Alphaproteobacteria	__Rhodospirillales	__Rhodospirillaceae	__Elstera	__Elstera cyanobacteriorum	1	1	NR_158149.1	NA	NA	0	0	0	0	0	0	0	0	0	0	0	0	0	0	12
denovo809	; __; __; __; __; __; __		__	__	__	__	__	__	1	1	NA	NA	NA	0	2	1	0	0	2	0	0	4	0	0	0	0	0	0
denovo810	Bacteria; __Bacteroidetes; __Flavobacteriia; __Flavobacteriales; __Flavobacteriaceae; __Tenacibaculum; __Tenacibaculum insulae	Bacteria	__Bacteroidetes	__Flavobacteriia	__Flavobacteriales	__Flavobacteriaceae	__Tenacibaculum	__Tenacibaculum insulae	1	1	NR_159277.1	NA	NA	0	0	0	0	3	0	0	0	0	0	0	0	0	0	0
denovo811	Bacteria; __Bacteroidetes; __Cytophagia; __Cytophagales; __Cytophagaceae; __Arcticibacterium; __Arcticibacterium luteifluviistationis	Bacteria	__Bacteroidetes	__Cytophagia	__Cytophagales	__Cytophagaceae	__Arcticibacterium	__Arcticibacterium luteifluviistationis	1	1	NR_156148.1	NA	NA	0	0	0	3	0	0	0	0	0	0	0	0	0	0	0
denovo812	Bacteria; __Bacteroidetes; __Flavobacteriia; __Flavobacteriales; __Cryomorphaceae; __Owenweeksia; __Owenweeksia hongkongensis	Bacteria	__Bacteroidetes	__Flavobacteriia	__Flavobacteriales	__Cryomorphaceae	__Owenweeksia	__Owenweeksia hongkongensis	1	1	NR_074100.1	NA	NA	0	0	0	0	0	0	0	0	0	0	0	0	0	3	0
denovo813	Bacteria; __Proteobacteria; __Alphaproteobacteria; __Rhodospirillales; __Acetobacteraceae; __Roseomonas; __Roseomonas hibiscisoli	Bacteria	__Proteobacteria	__Alphaproteobacteria	__Rhodospirillales	__Acetobacteraceae	__Roseomonas	__Roseomonas hibiscisoli	1	1	NR_157795.1	NA	NA	0	0	0	0	0	0	0	0	0	0	0	0	0	0	6
denovo814	Bacteria; __Proteobacteria; __Alphaproteobacteria; __Pelagibacterales; __Pelagibacteraceae; __Candidatus Pelagibacter; __Candidatus Pelagibacter ubique	Bacteria	__Proteobacteria	__Alphaproteobacteria	__Pelagibacterales	__Pelagibacteraceae	__Candidatus Pelagibacter	__Candidatus Pelagibacter ubique	1	1	NR_074224.1	NA	NA	0	0	3	0	0	0	0	0	0	0	0	0	0	0	0
denovo815	Bacteria; __Proteobacteria; __Gammaproteobacteria; __Alteromonadales; __Alteromonadaceae; __Alteromonas; __Alteromonas oceani	Bacteria	__Proteobacteria	__Gammaproteobacteria	__Alteromonadales	__Alteromonadaceae	__Alteromonas	__Alteromonas oceani	1	1	NR_159349.1	NA	NA	0	0	0	0	0	0	3	0	0	0	0	0	0	0	0
denovo816	Bacteria; __Proteobacteria; __Gammaproteobacteria; __Oceanospirillales; __Oceanospirillaceae; __Corallomonas; __Corallomonas stylophorae	Bacteria	__Proteobacteria	__Gammaproteobacteria	__Oceanospirillales	__Oceanospirillaceae	__Corallomonas	__Corallomonas stylophorae	1	1	NR_108836.1	NA	NA	0	0	2	0	0	0	0	0	0	0	0	0	0	1	0
denovo817	Bacteria; __Bacteroidetes; __Flavobacteriia; __Flavobacteriales; __Flavobacteriaceae; __Polaribacter; __Polaribacter haliotis	Bacteria	__Bacteroidetes	__Flavobacteriia	__Flavobacteriales	__Flavobacteriaceae	__Polaribacter	__Polaribacter haliotis	1	1	NR_153703.1	NA	NA	0	0	0	0	0	3	3	0	0	0	0	0	0	0	0
denovo818	Bacteria; __Bacteroidetes; __Flavobacteriia; __Flavobacteriales; __Crocinitomicaceae; __Wandonia; __Wandonia haliotis	Bacteria	__Bacteroidetes	__Flavobacteriia	__Flavobacteriales	__Crocinitomicaceae	__Wandonia	__Wandonia haliotis	1	1	NR_114284.1	NA	NA	0	0	0	0	0	2	0	0	4	0	0	0	0	0	0
denovo819	Bacteria; __Proteobacteria; __Gammaproteobacteria; __Alteromonadales; __Alteromonadaceae; __Alteromonas; __Alteromonas mediterranea	Bacteria	__Proteobacteria	__Gammaproteobacteria	__Alteromonadales	__Alteromonadaceae	__Alteromonas	__Alteromonas mediterranea	1	1	NR_148753.1	NA	NA	3	0	0	0	0	0	0	0	0	0	0	0	0	0	0
denovo820	Bacteria; __Proteobacteria; __Gammaproteobacteria; __Oceanospirillales; __Oceanospirillaceae; __Marinomonas; __Marinomonas rhizomae	Bacteria	__Proteobacteria	__Gammaproteobacteria	__Oceanospirillales	__Oceanospirillaceae	__Marinomonas	__Marinomonas rhizomae	1	1	NR_116233.1	NA	NA	0	0	0	0	0	0	0	0	0	0	0	0	0	3	0
denovo821	; __; __; __; __; __; __		__	__	__	__	__	__	1	1	NA	NA	NA	0	0	0	3	0	0	0	0	0	0	0	0	0	0	0
denovo822	; __; __; __; __; __; __		__	__	__	__	__	__	1	1	NA	NA	NA	0	0	0	0	0	0	0	3	0	0	0	0	0	0	0
denovo823	Bacteria; __Bacteroidetes; __Flavobacteriia; __Flavobacteriales; __Flavobacteriaceae; __Dokdonia; __Dokdonia genika	Bacteria	__Bacteroidetes	__Flavobacteriia	__Flavobacteriales	__Flavobacteriaceae	__Dokdonia	__Dokdonia genika	1	1	NR_113943.1	NA	NA	0	0	0	0	0	0	0	0	0	0	0	0	6	0	0
denovo824	; __; __; __; __; __; __		__	__	__	__	__	__	1	1	NA	NA	NA	0	0	0	0	0	0	0	0	0	0	0	3	0	0	0
denovo825	Bacteria; __Bacteroidetes; __Flavobacteriia; __Flavobacteriales; __Flavobacteriaceae; __Tenacibaculum; __Tenacibaculum aiptasiae	Bacteria	__Bacteroidetes	__Flavobacteriia	__Flavobacteriales	__Flavobacteriaceae	__Tenacibaculum	__Tenacibaculum aiptasiae	1	1	NR_044202.1	NA	NA	0	0	3	0	0	0	0	0	0	0	0	0	0	0	0
denovo826	Bacteria; __Proteobacteria; __Alphaproteobacteria; __Rhodobacterales; __Rhodobacteraceae; __Amaricoccus; __Amaricoccus kaplicensis	Bacteria	__Proteobacteria	__Alphaproteobacteria	__Rhodobacterales	__Rhodobacteraceae	__Amaricoccus	__Amaricoccus kaplicensis	1	1	NR_029201.1	NA	NA	0	0	0	0	0	0	0	0	0	0	0	0	0	0	6
denovo827	Bacteria; __Bacteroidetes; __Flavobacteriia; __Flavobacteriales; __Cryomorphaceae; __Owenweeksia; __Owenweeksia hongkongensis	Bacteria	__Bacteroidetes	__Flavobacteriia	__Flavobacteriales	__Cryomorphaceae	__Owenweeksia	__Owenweeksia hongkongensis	1	1	NR_074100.1	NA	NA	0	0	0	0	0	0	0	0	3	0	0	0	0	0	0
denovo828	Bacteria; __Proteobacteria; __Gammaproteobacteria; __Alteromonadales; __Alteromonadaceae; __Paraglaciecola; __Paraglaciecola arctica	Bacteria	__Proteobacteria	__Gammaproteobacteria	__Alteromonadales	__Alteromonadaceae	__Paraglaciecola	__Paraglaciecola arctica	1	1	NR_116288.1	NA	NA	0	0	0	3	0	0	0	0	0	0	0	0	0	0	0
denovo829	Bacteria; __Proteobacteria; __Alphaproteobacteria; __Rhodobacterales; __Hyphomonadaceae; __Hyphomonas; __Hyphomonas chukchiensis	Bacteria	__Proteobacteria	__Alphaproteobacteria	__Rhodobacterales	__Hyphomonadaceae	__Hyphomonas	__Hyphomonas chukchiensis	1	1	NR_148268.1	NA	NA	0	0	0	0	0	0	3	0	0	0	0	0	0	0	0
denovo830	Bacteria; __Proteobacteria; __Alphaproteobacteria; __Kordiimonadales; __Temperatibacteraceae; __Temperatibacter; __Temperatibacter marinus	Bacteria	__Proteobacteria	__Alphaproteobacteria	__Kordiimonadales	__Temperatibacteraceae	__Temperatibacter	__Temperatibacter marinus	1	1	NR_126192.1	NA	NA	0	0	0	0	0	3	0	0	0	0	0	0	0	0	0
denovo831	Bacteria; __Proteobacteria; __Betaproteobacteria; __Burkholderiales; __Burkholderiaceae; __Ralstonia; __Ralstonia insidiosa	Bacteria	__Proteobacteria	__Betaproteobacteria	__Burkholderiales	__Burkholderiaceae	__Ralstonia	__Ralstonia insidiosa	1	1	NR_025242.1	NA	NA	3	0	0	0	0	0	0	0	0	0	0	0	0	0	0
denovo832	; __; __; __; __; __; __		__	__	__	__	__	__	1	1	NA	NA	NA	0	0	0	0	0	0	0	0	0	3	0	0	0	0	0
denovo833	Bacteria; __Bacteroidetes; __Flavobacteriia; __Flavobacteriales; __Flavobacteriaceae; __Gramella; __Gramella antarctica	Bacteria	__Bacteroidetes	__Flavobacteriia	__Flavobacteriales	__Flavobacteriaceae	__Gramella	__Gramella antarctica	1	1	NR_159282.1	NA	NA	0	0	0	0	0	0	0	1	0	0	0	0	2	0	0
denovo834	Bacteria; __Bacteroidetes; __Flavobacteriia; __Flavobacteriales; __Flavobacteriaceae; __Lacinutrix; __Lacinutrix undariae	Bacteria	__Bacteroidetes	__Flavobacteriia	__Flavobacteriales	__Flavobacteriaceae	__Lacinutrix	__Lacinutrix undariae	1	1	NR_136819.1	NA	NA	0	0	0	0	0	0	0	0	0	0	3	0	0	0	0
denovo835	Bacteria; __Proteobacteria; __Alphaproteobacteria; __Caulobacterales; __Caulobacteraceae; __Woodsholea; __Woodsholea maritima	Bacteria	__Proteobacteria	__Alphaproteobacteria	__Caulobacterales	__Caulobacteraceae	__Woodsholea	__Woodsholea maritima	1	1	NR_025605.1	NA	NA	0	0	0	0	0	0	0	0	0	0	3	0	0	0	0
denovo836	Bacteria; __Proteobacteria; __Alphaproteobacteria; __Rhodospirillales; __Rhodospirillaceae; __Marivibrio; __Marivibrio halodurans	Bacteria	__Proteobacteria	__Alphaproteobacteria	__Rhodospirillales	__Rhodospirillaceae	__Marivibrio	__Marivibrio halodurans	1	1	NR_158148.1	NA	NA	0	0	0	0	0	0	0	0	0	0	0	1	0	2	0
denovo837	Bacteria; __Proteobacteria; __Gammaproteobacteria; __Chromatiales; __Granulosicoccaceae; __Granulosicoccus; __Granulosicoccus antarcticus	Bacteria	__Proteobacteria	__Gammaproteobacteria	__Chromatiales	__Granulosicoccaceae	__Granulosicoccus	__Granulosicoccus antarcticus	1	1	NR_114178.1	NA	NA	0	3	4	0	0	2	0	0	0	0	0	0	0	0	0
denovo838	Bacteria; __Bacteroidetes; __Cytophagia; __Cytophagales; __Flammeovirgaceae; __Roseivirga; __Roseivirga seohaensis	Bacteria	__Bacteroidetes	__Cytophagia	__Cytophagales	__Flammeovirgaceae	__Roseivirga	__Roseivirga seohaensis	1	1	NR_153705.1	NA	NA	3	0	0	0	0	0	0	0	0	0	0	0	0	0	0
denovo839	; __; __; __; __; __; __		__	__	__	__	__	__	1	1	NA	NA	NA	0	0	0	0	1	0	0	0	0	0	0	2	0	0	0
denovo840	Bacteria; __Proteobacteria; __Gammaproteobacteria; __Chromatiales; __; __Thiohalobacter; __Thiohalobacter thiocyanaticus	Bacteria	__Proteobacteria	__Gammaproteobacteria	__Chromatiales	__	__Thiohalobacter	__Thiohalobacter thiocyanaticus	1	1	NR_116699.1	NA	NA	0	0	0	0	0	0	0	0	0	0	0	0	0	3	0
denovo841	; __; __; __; __; __; __		__	__	__	__	__	__	1	1	NA	NA	NA	0	0	0	0	0	0	0	0	0	0	0	0	0	3	0
denovo842	Bacteria; __Proteobacteria; __Betaproteobacteria; __Rhodocyclales; __Azonexaceae; __Dechloromonas; __Dechloromonas hortensis	Bacteria	__Proteobacteria	__Betaproteobacteria	__Rhodocyclales	__Azonexaceae	__Dechloromonas	__Dechloromonas hortensis	1	1	NR_042819.1	NA	NA	0	0	0	0	0	0	0	0	0	0	0	0	0	0	3
denovo843	; __; __; __; __; __; __		__	__	__	__	__	__	1	1	NA	NA	NA	0	0	0	0	0	0	0	0	0	0	0	3	0	0	0
denovo844	Bacteria; __Proteobacteria; __Gammaproteobacteria; __Thiotrichales; __Fastidiosibacteraceae; __Cysteiniphilum; __Cysteiniphilum litorale	Bacteria	__Proteobacteria	__Gammaproteobacteria	__Thiotrichales	__Fastidiosibacteraceae	__Cysteiniphilum	__Cysteiniphilum litorale	1	1	NR_157652.1	NA	NA	0	0	0	0	0	0	0	0	0	0	0	0	0	3	0
denovo845	Bacteria; __Firmicutes; __Negativicutes; __Selenomonadales; __Selenomonadaceae; __Selenomonas; __Selenomonas flueggei	Bacteria	__Firmicutes	__Negativicutes	__Selenomonadales	__Selenomonadaceae	__Selenomonas	__Selenomonas flueggei	1	1	NR_113389.1	NA	NA	0	0	0	0	0	0	0	0	0	0	0	0	0	0	6
denovo846	Bacteria; __Bacteroidetes; __Sphingobacteriia; __Sphingobacteriales; __Sphingobacteriaceae; __Pedobacter; __Pedobacter quisquiliarum	Bacteria	__Bacteroidetes	__Sphingobacteriia	__Sphingobacteriales	__Sphingobacteriaceae	__Pedobacter	__Pedobacter quisquiliarum	1	1	NR_159284.1	NA	NA	0	0	0	0	0	0	0	0	0	0	0	0	0	0	3
denovo847	Bacteria; __Firmicutes; __Bacilli; __Bacillales; __Staphylococcaceae; __Macrococcus; __Macrococcus canis	Bacteria	__Firmicutes	__Bacilli	__Bacillales	__Staphylococcaceae	__Macrococcus	__Macrococcus canis	1	1	NR_156154.1	NA	NA	3	0	0	0	0	0	0	0	0	0	0	0	0	0	0
denovo848	Bacteria; __Cyanobacteria; __; __Nostocales; __Calotrichaceae; __Dulcicalothrix; __Dulcicalothrix necridiiformans	Bacteria	__Cyanobacteria	__	__Nostocales	__Calotrichaceae	__Dulcicalothrix	__Dulcicalothrix necridiiformans	1	1	NR_164867.1	NA	NA	0	0	0	0	0	0	0	0	0	3	3	1	2	0	0
denovo849	Bacteria; __Proteobacteria; __Gammaproteobacteria; __Alteromonadales; __Alteromonadaceae; __Paraglaciecola; __Paraglaciecola aestuariivivens	Bacteria	__Proteobacteria	__Gammaproteobacteria	__Alteromonadales	__Alteromonadaceae	__Paraglaciecola	__Paraglaciecola aestuariivivens	1	1	NR_159183.1	NA	NA	0	0	0	0	0	0	3	0	0	0	0	0	0	0	0
denovo850	Bacteria; __Firmicutes; __Tissierellia; __Tissierellales; __Peptoniphilaceae; __Finegoldia; __Finegoldia magna	Bacteria	__Firmicutes	__Tissierellia	__Tissierellales	__Peptoniphilaceae	__Finegoldia	__Finegoldia magna	1	1	NR_113383.1	NA	NA	0	0	0	0	0	0	0	0	0	0	0	0	0	0	3
denovo851	Bacteria; __Proteobacteria; __Gammaproteobacteria; __; __; __Pseudohongiella; __Pseudohongiella spirulinae	Bacteria	__Proteobacteria	__Gammaproteobacteria	__	__	__Pseudohongiella	__Pseudohongiella spirulinae	1	1	NR_126265.1	NA	NA	0	0	0	0	0	0	0	0	0	0	0	3	0	0	0
denovo852	; __; __; __; __; __; __		__	__	__	__	__	__	1	1	NA	NA	NA	0	3	4	0	1	0	0	0	1	0	0	0	0	0	0
denovo853	Bacteria; __Proteobacteria; __Alphaproteobacteria; __Rhodobacterales; __Rhodobacteraceae; __Roseovarius; __Roseovarius aestuarii	Bacteria	__Proteobacteria	__Alphaproteobacteria	__Rhodobacterales	__Rhodobacteraceae	__Roseovarius	__Roseovarius aestuarii	1	1	NR_044424.1	NA	NA	0	0	0	0	0	0	0	0	0	0	3	0	0	0	0
denovo854	; __; __; __; __; __; __		__	__	__	__	__	__	1	1	NA	NA	NA	0	0	0	3	0	0	0	0	0	0	0	0	0	0	0
denovo855	Bacteria; __Proteobacteria; __Gammaproteobacteria; __Alteromonadales; __Alteromonadaceae; __Paraglaciecola; __Paraglaciecola psychrophila	Bacteria	__Proteobacteria	__Gammaproteobacteria	__Alteromonadales	__Alteromonadaceae	__Paraglaciecola	__Paraglaciecola psychrophila	1	1	NR_043463.1	NA	NA	0	0	0	3	0	0	3	0	0	0	0	0	0	0	0
denovo856	; __; __; __; __; __; __		__	__	__	__	__	__	1	1	NA	NA	NA	0	0	0	0	0	0	0	0	0	0	0	3	0	0	0
denovo857	Bacteria; __Bacteroidetes; __Cytophagia; __Cytophagales; __Cytophagaceae; __Ekhidna; __Ekhidna lutea	Bacteria	__Bacteroidetes	__Cytophagia	__Cytophagales	__Cytophagaceae	__Ekhidna	__Ekhidna lutea	1	1	NR_115061.1	NA	NA	0	0	3	0	9	3	0	1	2	0	0	0	0	0	0
denovo858	; __; __; __; __; __; __		__	__	__	__	__	__	1	1	NA	NA	NA	0	0	0	0	0	3	0	0	0	0	0	0	0	0	0
denovo859	Bacteria; __Bacteroidetes; __Flavobacteriia; __Flavobacteriales; __Flavobacteriaceae; __Aquibacter; __Aquibacter zeaxanthinifaciens	Bacteria	__Bacteroidetes	__Flavobacteriia	__Flavobacteriales	__Flavobacteriaceae	__Aquibacter	__Aquibacter zeaxanthinifaciens	1	1	NR_125631.1	NA	NA	0	0	0	0	0	0	0	0	0	0	0	3	0	0	0
denovo860	; __; __; __; __; __; __		__	__	__	__	__	__	1	1	NA	NA	NA	0	0	0	0	0	0	3	0	0	0	0	0	0	0	0
denovo861	; __; __; __; __; __; __		__	__	__	__	__	__	1	1	NA	NA	NA	0	0	0	0	0	0	0	0	0	0	0	0	3	0	0
denovo862	Bacteria; __Proteobacteria; __Gammaproteobacteria; __Xanthomonadales; __Xanthomonadaceae; __Lysobacter; __Lysobacter humi	Bacteria	__Proteobacteria	__Gammaproteobacteria	__Xanthomonadales	__Xanthomonadaceae	__Lysobacter	__Lysobacter humi	1	1	NR_156843.1	NA	NA	0	0	0	0	0	0	0	0	0	0	0	0	0	0	6
denovo863	Bacteria; __Proteobacteria; __Alphaproteobacteria; __Rhodobacterales; __Rhodobacteraceae; __Planktomarina; __Planktomarina temperata	Bacteria	__Proteobacteria	__Alphaproteobacteria	__Rhodobacterales	__Rhodobacteraceae	__Planktomarina	__Planktomarina temperata	1	1	NR_125550.1	NA	NA	0	0	0	0	0	0	0	0	0	3	0	0	0	0	0
denovo864	Bacteria; __Proteobacteria; __Gammaproteobacteria; __Oceanospirillales; __Balneatrichaceae; __Balneatrix; __Balneatrix alpica	Bacteria	__Proteobacteria	__Gammaproteobacteria	__Oceanospirillales	__Balneatrichaceae	__Balneatrix	__Balneatrix alpica	1	1	NR_026465.1	NA	NA	0	0	0	0	1	0	0	1	1	0	0	0	0	0	0
denovo865	Bacteria; __Proteobacteria; __Gammaproteobacteria; __Chromatiales; __; __Thiohalobacter; __Thiohalobacter thiocyanaticus	Bacteria	__Proteobacteria	__Gammaproteobacteria	__Chromatiales	__	__Thiohalobacter	__Thiohalobacter thiocyanaticus	1	1	NR_116699.1	NA	NA	0	0	0	0	0	0	0	0	0	0	3	0	0	0	0
denovo866	Bacteria; __Cyanobacteria; __; __Nostocales; __Calotrichaceae; __Dulcicalothrix; __Dulcicalothrix necridiiformans	Bacteria	__Cyanobacteria	__	__Nostocales	__Calotrichaceae	__Dulcicalothrix	__Dulcicalothrix necridiiformans	1	1	NR_164867.1	NA	NA	0	0	1	0	2	0	4	0	0	0	3	0	2	0	0
denovo867	Bacteria; __Firmicutes; __Bacilli; __Bacillales; __Staphylococcaceae; __Macrococcus; __Macrococcus brunensis	Bacteria	__Firmicutes	__Bacilli	__Bacillales	__Staphylococcaceae	__Macrococcus	__Macrococcus brunensis	1	1	NR_036847.1	NA	NA	3	0	0	0	0	0	0	0	0	0	0	0	0	0	0
denovo868	Bacteria; __Firmicutes; __Bacilli; __Lactobacillales; __Lactobacillaceae; __Lactobacillus; __Lactobacillus graminis	Bacteria	__Firmicutes	__Bacilli	__Lactobacillales	__Lactobacillaceae	__Lactobacillus	__Lactobacillus graminis	1	1	NR_042438.1	NA	NA	0	0	0	0	0	0	0	0	0	0	0	0	0	0	3
denovo869	Bacteria; __Verrucomicrobia; __Opitutae; __Puniceicoccales; __Puniceicoccaceae; __Ruficoccus; __Ruficoccus amylovorans	Bacteria	__Verrucomicrobia	__Opitutae	__Puniceicoccales	__Puniceicoccaceae	__Ruficoccus	__Ruficoccus amylovorans	1	1	NR_156844.1	NA	NA	0	0	2	0	0	0	0	0	1	0	0	0	0	0	0
denovo870	Bacteria; __Proteobacteria; __Gammaproteobacteria; __Chromatiales; __; __Thiohalobacter; __Thiohalobacter thiocyanaticus	Bacteria	__Proteobacteria	__Gammaproteobacteria	__Chromatiales	__	__Thiohalobacter	__Thiohalobacter thiocyanaticus	1	1	NR_116699.1	NA	NA	0	0	0	0	0	0	0	0	0	0	0	0	3	0	0
denovo871	Bacteria; __Actinobacteria; __Acidimicrobiia; __Acidimicrobiales; __Acidimicrobiaceae; __Aciditerrimonas; __Aciditerrimonas ferrireducens	Bacteria	__Actinobacteria	__Acidimicrobiia	__Acidimicrobiales	__Acidimicrobiaceae	__Aciditerrimonas	__Aciditerrimonas ferrireducens	1	1	NR_112972.1	NA	NA	0	0	0	0	0	0	0	0	0	0	0	0	0	3	0
denovo872	Bacteria; __Proteobacteria; __Gammaproteobacteria; __Alteromonadales; __Alteromonadaceae; __Paraglaciecola; __Paraglaciecola aestuariivivens	Bacteria	__Proteobacteria	__Gammaproteobacteria	__Alteromonadales	__Alteromonadaceae	__Paraglaciecola	__Paraglaciecola aestuariivivens	1	1	NR_159183.1	NA	NA	0	0	0	5	0	0	1	0	0	0	0	0	0	0	0
denovo873	; __; __; __; __; __; __		__	__	__	__	__	__	1	1	NA	NA	NA	0	0	0	0	0	0	3	0	0	0	0	0	0	0	0
denovo874	Bacteria; __Bacteroidetes; __Flavobacteriia; __Flavobacteriales; __Flavobacteriaceae; __Winogradskyella; __Winogradskyella litoriviva	Bacteria	__Bacteroidetes	__Flavobacteriia	__Flavobacteriales	__Flavobacteriaceae	__Winogradskyella	__Winogradskyella litoriviva	1	1	NR_137338.1	NA	NA	0	0	0	1	0	0	2	0	0	0	0	0	0	0	0
denovo875	Bacteria; __Proteobacteria; __Gammaproteobacteria; __Pseudomonadales; __Pseudomonadaceae; __Pseudomonas; __Pseudomonas trivialis	Bacteria	__Proteobacteria	__Gammaproteobacteria	__Pseudomonadales	__Pseudomonadaceae	__Pseudomonas	__Pseudomonas trivialis	1	1	NR_028987.1	NA	NA	3	0	0	3	0	0	0	0	0	0	0	0	0	0	0
denovo876	Bacteria; __Bacteroidetes; __Sphingobacteriia; __Sphingobacteriales; __Sphingobacteriaceae; __Pararcticibacter; __Pararcticibacter tournemirensis	Bacteria	__Bacteroidetes	__Sphingobacteriia	__Sphingobacteriales	__Sphingobacteriaceae	__Pararcticibacter	__Pararcticibacter tournemirensis	1	1	NR_117454.1	NA	NA	0	3	0	0	0	0	0	0	0	0	0	0	0	0	0
denovo877	Bacteria; __Planctomycetes; __Phycisphaerae; __Phycisphaerales; __Phycisphaeraceae; __Phycisphaera; __Phycisphaera mikurensis	Bacteria	__Planctomycetes	__Phycisphaerae	__Phycisphaerales	__Phycisphaeraceae	__Phycisphaera	__Phycisphaera mikurensis	1	1	NR_074491.2	NA	NA	0	0	0	0	0	0	0	0	2	0	0	0	0	1	0
denovo878	Bacteria; __Proteobacteria; __Alphaproteobacteria; __Pelagibacterales; __Pelagibacteraceae; __Candidatus Pelagibacter; __Candidatus Pelagibacter ubique	Bacteria	__Proteobacteria	__Alphaproteobacteria	__Pelagibacterales	__Pelagibacteraceae	__Candidatus Pelagibacter	__Candidatus Pelagibacter ubique	1	1	NR_074224.1	NA	NA	0	0	0	0	0	0	0	0	3	0	0	0	0	0	0
denovo879	Bacteria; __Proteobacteria; __Alphaproteobacteria; __Rhodospirillales; __Rhodospirillaceae; __Magnetospira; __Magnetospira thiophila	Bacteria	__Proteobacteria	__Alphaproteobacteria	__Rhodospirillales	__Rhodospirillaceae	__Magnetospira	__Magnetospira thiophila	1	1	NR_116475.1	NA	NA	0	2	4	0	0	0	0	0	0	0	0	0	0	0	0
denovo880	Bacteria; __Proteobacteria; __Gammaproteobacteria; __Alteromonadales; __Alteromonadaceae; __Glaciecola; __Glaciecola nitratireducens	Bacteria	__Proteobacteria	__Gammaproteobacteria	__Alteromonadales	__Alteromonadaceae	__Glaciecola	__Glaciecola nitratireducens	1	1	NR_074628.1	NA	NA	0	0	0	0	0	3	0	0	0	0	0	0	0	0	0
denovo881	Bacteria; __Proteobacteria; __Gammaproteobacteria; __Cellvibrionales; __Halieaceae; __Halioglobus; __Halioglobus japonicus	Bacteria	__Proteobacteria	__Gammaproteobacteria	__Cellvibrionales	__Halieaceae	__Halioglobus	__Halioglobus japonicus	1	1	NR_113277.1	NA	NA	0	0	0	0	0	0	0	0	3	0	0	0	0	0	0
denovo882	Bacteria; __Bacteroidetes; __Bacteroidia; __Bacteroidales; __Bacteroidaceae; __Bacteroides; __Bacteroides plebeius	Bacteria	__Bacteroidetes	__Bacteroidia	__Bacteroidales	__Bacteroidaceae	__Bacteroides	__Bacteroides plebeius	1	1	NR_041277.1	NA	NA	0	0	0	0	0	0	0	0	0	0	0	0	0	0	3
denovo883	Bacteria; __Proteobacteria; __Gammaproteobacteria; __Alteromonadales; __Colwelliaceae; __Colwellia; __Colwellia hornerae	Bacteria	__Proteobacteria	__Gammaproteobacteria	__Alteromonadales	__Colwelliaceae	__Colwellia	__Colwellia hornerae	1	1	NR_104941.1	NA	NA	1	0	0	1	0	0	7	0	0	0	0	0	0	0	0
denovo884	Bacteria; __Proteobacteria; __Gammaproteobacteria; __Cellvibrionales; __Cellvibrionaceae; __Eionea; __Eionea nigra	Bacteria	__Proteobacteria	__Gammaproteobacteria	__Cellvibrionales	__Cellvibrionaceae	__Eionea	__Eionea nigra	1	1	NR_115270.1	NA	NA	0	0	0	0	0	0	0	0	0	0	0	0	3	0	0
denovo885	Bacteria; __Proteobacteria; __Gammaproteobacteria; __Oceanospirillales; __Oceanospirillaceae; __Oleibacter; __Oleibacter marinus	Bacteria	__Proteobacteria	__Gammaproteobacteria	__Oceanospirillales	__Oceanospirillaceae	__Oleibacter	__Oleibacter marinus	1	1	NR_114287.1	NA	NA	0	0	0	0	0	0	3	0	0	0	0	0	0	0	0
denovo886	Bacteria; __Proteobacteria; __Gammaproteobacteria; __Thiotrichales; __Francisellaceae; __Francisella; __Francisella philomiragia	Bacteria	__Proteobacteria	__Gammaproteobacteria	__Thiotrichales	__Francisellaceae	__Francisella	__Francisella philomiragia	1	1	NR_043277.1	NA	NA	0	0	1	0	0	0	0	2	0	0	0	0	0	0	0
denovo887	Bacteria; __Bacteroidetes; __Flavobacteriia; __Flavobacteriales; __Flavobacteriaceae; __Polaribacter; __Polaribacter sejongensis	Bacteria	__Bacteroidetes	__Flavobacteriia	__Flavobacteriales	__Flavobacteriaceae	__Polaribacter	__Polaribacter sejongensis	1	1	NR_109324.1	NA	NA	0	0	0	0	0	0	0	0	0	3	0	0	0	0	0
denovo888	Bacteria; __Proteobacteria; __Gammaproteobacteria; __Alteromonadales; __Colwelliaceae; __Colwellia; __Colwellia beringensis	Bacteria	__Proteobacteria	__Gammaproteobacteria	__Alteromonadales	__Colwelliaceae	__Colwellia	__Colwellia beringensis	1	1	NR_159245.1	NA	NA	0	0	0	0	0	3	0	0	0	0	0	0	0	0	0
denovo889	Bacteria; __Bacteroidetes; __Flavobacteriia; __Flavobacteriales; __Flavobacteriaceae; __Gaetbulibacter; __Gaetbulibacter jejuensis	Bacteria	__Bacteroidetes	__Flavobacteriia	__Flavobacteriales	__Flavobacteriaceae	__Gaetbulibacter	__Gaetbulibacter jejuensis	1	1	NR_116705.1	NA	NA	0	0	0	0	0	0	0	0	0	0	3	0	0	0	0
denovo890	Bacteria; __Proteobacteria; __Gammaproteobacteria; __Pseudomonadales; __Pseudomonadaceae; __Pseudomonas; __Pseudomonas oryzihabitans	Bacteria	__Proteobacteria	__Gammaproteobacteria	__Pseudomonadales	__Pseudomonadaceae	__Pseudomonas	__Pseudomonas oryzihabitans	1	1	NR_114041.1	NA	NA	0	0	0	0	0	0	0	0	0	0	0	0	0	0	6
denovo891	Bacteria; __Proteobacteria; __Betaproteobacteria; __Burkholderiales; __Oxalobacteraceae; __Lacisediminimonas; __Lacisediminimonas profundi	Bacteria	__Proteobacteria	__Betaproteobacteria	__Burkholderiales	__Oxalobacteraceae	__Lacisediminimonas	__Lacisediminimonas profundi	1	1	NR_165788.1	NA	NA	0	0	0	0	0	0	0	0	0	0	0	0	0	0	3
denovo892	Bacteria; __Bacteroidetes; __Flavobacteriia; __Flavobacteriales; __Cryomorphaceae; __Phaeocystidibacter; __Phaeocystidibacter marisrubri	Bacteria	__Bacteroidetes	__Flavobacteriia	__Flavobacteriales	__Cryomorphaceae	__Phaeocystidibacter	__Phaeocystidibacter marisrubri	1	1	NR_136475.1	NA	NA	0	0	0	0	0	0	0	0	0	2	0	0	1	0	0
denovo893	; __; __; __; __; __; __		__	__	__	__	__	__	1	1	NA	NA	NA	0	0	0	0	0	0	0	0	0	0	0	0	0	0	3
denovo894	; __; __; __; __; __; __		__	__	__	__	__	__	1	1	NA	NA	NA	0	0	0	0	0	0	0	0	0	0	0	0	0	3	0
denovo895	Bacteria; __Firmicutes; __Bacilli; __Lactobacillales; __Carnobacteriaceae; __Alkalibacterium; __Alkalibacterium olivapovliticus	Bacteria	__Firmicutes	__Bacilli	__Lactobacillales	__Carnobacteriaceae	__Alkalibacterium	__Alkalibacterium olivapovliticus	1	1	NR_112658.1	NA	NA	0	0	0	1	2	0	0	0	0	0	0	0	0	0	0
denovo896	Bacteria; __Bacteroidetes; __Flavobacteriia; __Flavobacteriales; __Flavobacteriaceae; __Flavicella; __Flavicella marina	Bacteria	__Bacteroidetes	__Flavobacteriia	__Flavobacteriales	__Flavobacteriaceae	__Flavicella	__Flavicella marina	1	1	NR_134724.1	NA	NA	0	0	0	0	0	0	3	0	0	0	0	0	0	0	0
denovo897	Bacteria; __Bacteroidetes; __Sphingobacteriia; __Sphingobacteriales; __Sphingobacteriaceae; __Mucilaginibacter; __Mucilaginibacter koreensis	Bacteria	__Bacteroidetes	__Sphingobacteriia	__Sphingobacteriales	__Sphingobacteriaceae	__Mucilaginibacter	__Mucilaginibacter koreensis	1	1	NR_134092.1	NA	NA	0	0	0	0	0	0	0	0	0	0	0	0	0	0	3
denovo898	Bacteria; __Proteobacteria; __Alphaproteobacteria; __Rhizobiales; __; __Methyloligella; __Methyloligella solikamskensis	Bacteria	__Proteobacteria	__Alphaproteobacteria	__Rhizobiales	__	__Methyloligella	__Methyloligella solikamskensis	1	1	NR_125614.1	NA	NA	0	0	0	0	0	0	0	0	0	0	0	0	0	0	3
denovo899	Bacteria; __Bacteroidetes; __Flavobacteriia; __Flavobacteriales; __Cryomorphaceae; __Vicingus; __Vicingus serpentipes	Bacteria	__Bacteroidetes	__Flavobacteriia	__Flavobacteriales	__Cryomorphaceae	__Vicingus	__Vicingus serpentipes	1	1	NR_159281.1	NA	NA	0	0	0	0	0	0	0	3	0	0	0	0	0	0	0
denovo900	Bacteria; __Proteobacteria; __Gammaproteobacteria; __Arenicellales; __Arenicellaceae; __Arenicella; __Arenicella xantha	Bacteria	__Proteobacteria	__Gammaproteobacteria	__Arenicellales	__Arenicellaceae	__Arenicella	__Arenicella xantha	1	1	NR_112914.1	NA	NA	0	0	0	0	2	1	0	0	0	0	0	0	0	0	0
denovo901	Bacteria; __Proteobacteria; __Alphaproteobacteria; __Rhodobacterales; __Rhodobacteraceae; __Amylibacter; __Amylibacter lutimaris	Bacteria	__Proteobacteria	__Alphaproteobacteria	__Rhodobacterales	__Rhodobacteraceae	__Amylibacter	__Amylibacter lutimaris	1	1	NR_158154.1	NA	NA	0	3	0	0	3	0	0	0	0	0	0	0	0	0	0
denovo902	; __; __; __; __; __; __		__	__	__	__	__	__	1	1	NA	NA	NA	0	0	0	0	0	0	0	0	0	0	0	0	0	0	3
denovo903	Bacteria; __Proteobacteria; __Alphaproteobacteria; __Rhodospirillales; __Rhodospirillaceae; __Azospirillum; __Azospirillum brasilense	Bacteria	__Proteobacteria	__Alphaproteobacteria	__Rhodospirillales	__Rhodospirillaceae	__Azospirillum	__Azospirillum brasilense	1	1	NR_114057.1	NA	NA	0	6	1	0	0	0	0	0	0	0	0	0	1	1	0
denovo904	; __; __; __; __; __; __		__	__	__	__	__	__	1	1	NA	NA	NA	0	0	0	0	0	0	0	0	0	3	0	0	0	0	0
denovo905	Bacteria; __Proteobacteria; __Deltaproteobacteria; __Desulfovibrionales; __Desulfovibrionaceae; __Desulfovibrio; __Desulfovibrio butyratiphilus	Bacteria	__Proteobacteria	__Deltaproteobacteria	__Desulfovibrionales	__Desulfovibrionaceae	__Desulfovibrio	__Desulfovibrio butyratiphilus	1	1	NR_112678.1	NA	NA	0	0	0	0	0	0	0	0	3	0	0	0	0	0	0
denovo906	Bacteria; __Proteobacteria; __Gammaproteobacteria; __Oceanospirillales; __Oceanospirillaceae; __Marinomonas; __Marinomonas blandensis	Bacteria	__Proteobacteria	__Gammaproteobacteria	__Oceanospirillales	__Oceanospirillaceae	__Marinomonas	__Marinomonas blandensis	1	1	NR_153747.1	NA	NA	0	0	0	0	0	0	0	0	0	0	0	0	0	3	0
denovo907	; __; __; __; __; __; __		__	__	__	__	__	__	1	1	NA	NA	NA	0	0	1	0	0	0	0	0	0	0	0	0	0	5	0
denovo908	Bacteria; __Proteobacteria; __Alphaproteobacteria; __Parvularculales; __Parvularculaceae; __Parvularcula; __Parvularcula dongshanensis	Bacteria	__Proteobacteria	__Alphaproteobacteria	__Parvularculales	__Parvularculaceae	__Parvularcula	__Parvularcula dongshanensis	1	1	NR_109626.1	NA	NA	0	0	0	0	0	0	0	0	0	0	3	0	0	0	0
denovo909	Bacteria; __Cyanobacteria; __; __Synechococcales; __Chamaesiphonaceae; __Chamaesiphon; __Chamaesiphon minutus	Bacteria	__Cyanobacteria	__	__Synechococcales	__Chamaesiphonaceae	__Chamaesiphon	__Chamaesiphon minutus	1	1	NR_102459.1	NA	NA	0	0	0	0	0	0	0	0	0	3	0	0	0	0	0
denovo910	Bacteria; __Bacteroidetes; __Bacteroidia; __Bacteroidales; __Prevotellaceae; __Prevotella; __Prevotella oris	Bacteria	__Bacteroidetes	__Bacteroidia	__Bacteroidales	__Prevotellaceae	__Prevotella	__Prevotella oris	1	1	NR_113118.1	NA	NA	0	0	0	0	0	0	0	0	0	0	0	0	0	0	3
denovo911	; __; __; __; __; __; __		__	__	__	__	__	__	1	1	NA	NA	NA	0	0	0	0	0	0	0	0	0	0	0	0	0	3	0
denovo912	Bacteria; __Proteobacteria; __Alphaproteobacteria; __Rhodobacterales; __Hyphomonadaceae; __Fretibacter; __Fretibacter rubidus	Bacteria	__Proteobacteria	__Alphaproteobacteria	__Rhodobacterales	__Hyphomonadaceae	__Fretibacter	__Fretibacter rubidus	1	1	NR_135726.1	NA	NA	0	0	0	0	0	0	0	0	0	3	0	0	0	0	0
denovo913	; __; __; __; __; __; __		__	__	__	__	__	__	1	1	NA	NA	NA	0	0	0	3	0	0	0	0	0	0	0	0	0	0	0
denovo914	; __; __; __; __; __; __		__	__	__	__	__	__	1	1	NA	NA	NA	0	0	0	0	0	0	0	0	0	0	0	0	0	3	0
denovo915	Bacteria; __Proteobacteria; __Alphaproteobacteria; __Rhodospirillales; __Rhodospirillaceae; __Thalassobaculum; __Thalassobaculum fulvum	Bacteria	__Proteobacteria	__Alphaproteobacteria	__Rhodospirillales	__Rhodospirillaceae	__Thalassobaculum	__Thalassobaculum fulvum	1	1	NR_149296.1	NA	NA	0	0	0	0	1	0	0	0	2	0	0	0	0	0	0
denovo916	; __; __; __; __; __; __		__	__	__	__	__	__	1	1	NA	NA	NA	0	0	0	0	0	0	0	3	0	0	0	0	0	0	0
denovo917	; __; __; __; __; __; __		__	__	__	__	__	__	1	1	NA	NA	NA	0	3	0	0	0	0	0	0	0	0	0	0	0	0	0
denovo918	Bacteria; __Proteobacteria; __Deltaproteobacteria; __Myxococcales; __Polyangiaceae; __Aetherobacter; __Aetherobacter rufus	Bacteria	__Proteobacteria	__Deltaproteobacteria	__Myxococcales	__Polyangiaceae	__Aetherobacter	__Aetherobacter rufus	1	1	NR_148645.1	NA	NA	0	0	3	0	0	0	0	0	0	0	0	0	0	0	0
denovo919	Bacteria; __Bacteroidetes; __Flavobacteriia; __Flavobacteriales; __Flavobacteriaceae; __Polaribacter; __Polaribacter haliotis	Bacteria	__Bacteroidetes	__Flavobacteriia	__Flavobacteriales	__Flavobacteriaceae	__Polaribacter	__Polaribacter haliotis	1	1	NR_153703.1	NA	NA	0	0	0	0	3	0	0	0	0	0	0	0	0	0	0
denovo920	Bacteria; __Proteobacteria; __Deltaproteobacteria; __Desulfobacterales; __Desulfobacteraceae; __Desulfosarcina; __Desulfosarcina alkanivorans	Bacteria	__Proteobacteria	__Deltaproteobacteria	__Desulfobacterales	__Desulfobacteraceae	__Desulfosarcina	__Desulfosarcina alkanivorans	1	1	NR_157797.1	NA	NA	0	0	0	0	0	0	0	0	0	0	0	0	3	0	0
denovo921	Bacteria; __Bacteroidetes; __Flavobacteriia; __Flavobacteriales; __Flavobacteriaceae; __Gelidibacter; __Gelidibacter mesophilus	Bacteria	__Bacteroidetes	__Flavobacteriia	__Flavobacteriales	__Flavobacteriaceae	__Gelidibacter	__Gelidibacter mesophilus	1	1	NR_028956.1	NA	NA	0	0	0	0	0	0	0	0	0	0	0	0	3	0	0
denovo922	Bacteria; __Bacteroidetes; __Flavobacteriia; __Flavobacteriales; __Cryomorphaceae; __Vicingus; __Vicingus serpentipes	Bacteria	__Bacteroidetes	__Flavobacteriia	__Flavobacteriales	__Cryomorphaceae	__Vicingus	__Vicingus serpentipes	1	1	NR_159281.1	NA	NA	0	0	0	0	0	0	0	3	0	0	0	0	0	0	0
denovo923	Bacteria; __Bacteroidetes; __Flavobacteriia; __Flavobacteriales; __Flavobacteriaceae; __Psychroflexus; __Psychroflexus torquis	Bacteria	__Bacteroidetes	__Flavobacteriia	__Flavobacteriales	__Flavobacteriaceae	__Psychroflexus	__Psychroflexus torquis	1	1	NR_074147.1	NA	NA	0	0	0	1	0	0	2	0	0	0	0	0	0	0	0
denovo924	Bacteria; __Proteobacteria; __Alphaproteobacteria; __Rhodobacterales; __Rhodobacteraceae; __Nereida; __Nereida ignava	Bacteria	__Proteobacteria	__Alphaproteobacteria	__Rhodobacterales	__Rhodobacteraceae	__Nereida	__Nereida ignava	1	1	NR_115897.1	NA	NA	3	0	0	0	0	0	0	0	0	0	0	0	0	0	0
denovo925	Bacteria; __Verrucomicrobia; __Verrucomicrobiae; __Verrucomicrobiales; __Verrucomicrobiaceae; __Fucophilus; __Fucophilus fucoidanolyticus	Bacteria	__Verrucomicrobia	__Verrucomicrobiae	__Verrucomicrobiales	__Verrucomicrobiaceae	__Fucophilus	__Fucophilus fucoidanolyticus	1	1	NR_112167.1	NA	NA	0	0	0	0	0	0	0	0	0	0	0	3	0	0	0
denovo926	Bacteria; __Bacteroidetes; __Flavobacteriia; __Flavobacteriales; __Flavobacteriaceae; __Aureivirga; __Aureivirga marina	Bacteria	__Bacteroidetes	__Flavobacteriia	__Flavobacteriales	__Flavobacteriaceae	__Aureivirga	__Aureivirga marina	1	1	NR_109513.1	NA	NA	0	0	0	0	0	0	0	3	0	0	0	0	0	0	0
denovo927	Bacteria; __Firmicutes; __Negativicutes; __Veillonellales; __Veillonellaceae; __Dialister; __Dialister pneumosintes	Bacteria	__Firmicutes	__Negativicutes	__Veillonellales	__Veillonellaceae	__Dialister	__Dialister pneumosintes	1	1	NR_026229.1	NA	NA	0	0	0	0	0	0	0	0	0	0	0	0	0	0	3
denovo928	Bacteria; __Proteobacteria; __Gammaproteobacteria; __Chromatiales; __Granulosicoccaceae; __Granulosicoccus; __Granulosicoccus coccoides	Bacteria	__Proteobacteria	__Gammaproteobacteria	__Chromatiales	__Granulosicoccaceae	__Granulosicoccus	__Granulosicoccus coccoides	1	1	NR_104509.1	NA	NA	0	0	0	0	0	0	0	0	0	0	0	0	0	0	6
denovo929	Bacteria; __Proteobacteria; __Alphaproteobacteria; __Pelagibacterales; __Pelagibacteraceae; __Candidatus Pelagibacter; __Candidatus Pelagibacter ubique	Bacteria	__Proteobacteria	__Alphaproteobacteria	__Pelagibacterales	__Pelagibacteraceae	__Candidatus Pelagibacter	__Candidatus Pelagibacter ubique	1	1	NR_074224.1	NA	NA	0	0	0	0	0	0	0	0	3	0	0	0	0	0	0
denovo930	Bacteria; __Actinobacteria; __Actinobacteria; __Kineosporiales; __Kineosporiaceae; __Kineococcus; __Kineococcus xinjiangensis	Bacteria	__Actinobacteria	__Actinobacteria	__Kineosporiales	__Kineosporiaceae	__Kineococcus	__Kineococcus xinjiangensis	1	1	NR_044522.1	NA	NA	0	0	0	0	0	0	0	0	0	0	3	0	0	0	0
denovo931	; __; __; __; __; __; __		__	__	__	__	__	__	1	1	NA	NA	NA	0	0	0	0	0	0	0	0	0	1	0	0	2	0	0
denovo932	; __; __; __; __; __; __		__	__	__	__	__	__	1	1	NA	NA	NA	0	0	0	0	0	0	0	0	0	0	0	0	0	3	0
denovo933	Bacteria; __Proteobacteria; __Alphaproteobacteria; __Rhizobiales; __Phyllobacteriaceae; __Lentilitoribacter; __Lentilitoribacter donghaensis	Bacteria	__Proteobacteria	__Alphaproteobacteria	__Rhizobiales	__Phyllobacteriaceae	__Lentilitoribacter	__Lentilitoribacter donghaensis	1	1	NR_132291.1	NA	NA	0	0	0	0	0	0	0	0	0	3	0	0	0	0	0
denovo934	; __; __; __; __; __; __		__	__	__	__	__	__	1	1	NA	NA	NA	0	0	0	0	0	3	0	0	0	0	0	0	0	0	0
denovo935	Bacteria; __Bacteroidetes; __Flavobacteriia; __Flavobacteriales; __Cryomorphaceae; __Vicingus; __Vicingus serpentipes	Bacteria	__Bacteroidetes	__Flavobacteriia	__Flavobacteriales	__Cryomorphaceae	__Vicingus	__Vicingus serpentipes	1	1	NR_159281.1	NA	NA	0	0	0	0	0	0	0	3	0	0	0	0	0	0	0
denovo936	Bacteria; __Chloroflexi; __Dehalococcoidia; __; __; __Dehalogenimonas; __Dehalogenimonas lykanthroporepellens	Bacteria	__Chloroflexi	__Dehalococcoidia	__	__	__Dehalogenimonas	__Dehalogenimonas lykanthroporepellens	1	1	NR_074337.1	NA	NA	0	0	0	0	0	0	0	0	0	0	0	0	0	6	0
denovo937	Bacteria; __Bacteroidetes; __Cytophagia; __Cytophagales; __Cytophagaceae; __Marinoscillum; __Marinoscillum luteum	Bacteria	__Bacteroidetes	__Cytophagia	__Cytophagales	__Cytophagaceae	__Marinoscillum	__Marinoscillum luteum	1	1	NR_108992.1	NA	NA	0	0	0	0	0	0	0	3	0	0	0	0	0	0	0
denovo938	Bacteria; __Proteobacteria; __Betaproteobacteria; __Nitrosomonadales; __Methylophilaceae; __Methylotenera; __Methylotenera versatilis	Bacteria	__Proteobacteria	__Betaproteobacteria	__Nitrosomonadales	__Methylophilaceae	__Methylotenera	__Methylotenera versatilis	1	1	NR_074693.1	NA	NA	0	0	0	0	0	0	0	0	0	0	0	3	0	0	0
denovo939	Bacteria; __Bacteroidetes; __Flavobacteriia; __Flavobacteriales; __Cryomorphaceae; __Vicingus; __Vicingus serpentipes	Bacteria	__Bacteroidetes	__Flavobacteriia	__Flavobacteriales	__Cryomorphaceae	__Vicingus	__Vicingus serpentipes	1	1	NR_159281.1	NA	NA	0	0	0	0	0	0	0	0	0	0	0	0	3	0	0
denovo940	Bacteria; __Proteobacteria; __Gammaproteobacteria; __; __; __Pseudohongiella; __Pseudohongiella spirulinae	Bacteria	__Proteobacteria	__Gammaproteobacteria	__	__	__Pseudohongiella	__Pseudohongiella spirulinae	1	1	NR_126265.1	NA	NA	0	0	0	0	0	3	0	0	0	0	0	0	0	0	0
denovo941	Bacteria; __Proteobacteria; __Alphaproteobacteria; __Rhodobacterales; __Rhodobacteraceae; __Amylibacter; __Amylibacter ulvae	Bacteria	__Proteobacteria	__Alphaproteobacteria	__Rhodobacterales	__Rhodobacteraceae	__Amylibacter	__Amylibacter ulvae	1	1	NR_146351.1	NA	NA	1	0	0	2	0	0	0	0	0	0	0	0	3	3	0
denovo942	Bacteria; __Bacteroidetes; __Flavobacteriia; __Flavobacteriales; __Flavobacteriaceae; __Polaribacter; __Polaribacter irgensii	Bacteria	__Bacteroidetes	__Flavobacteriia	__Flavobacteriales	__Flavobacteriaceae	__Polaribacter	__Polaribacter irgensii	1	1	NR_044733.2	NA	NA	0	0	0	0	0	0	0	0	0	0	0	0	3	0	0
denovo943	Bacteria; __Bacteroidetes; __Flavobacteriia; __Flavobacteriales; __Flavobacteriaceae; __Empedobacter; __Empedobacter brevis	Bacteria	__Bacteroidetes	__Flavobacteriia	__Flavobacteriales	__Flavobacteriaceae	__Empedobacter	__Empedobacter brevis	1	1	NR_112974.1	NA	NA	0	0	0	0	0	0	0	0	0	0	0	0	3	0	0
denovo944	Bacteria; __Proteobacteria; __Gammaproteobacteria; __Oceanospirillales; __Balneatrichaceae; __Balneatrix; __Balneatrix alpica	Bacteria	__Proteobacteria	__Gammaproteobacteria	__Oceanospirillales	__Balneatrichaceae	__Balneatrix	__Balneatrix alpica	1	1	NR_026465.1	NA	NA	0	0	0	0	0	3	0	0	0	0	0	0	0	0	0
denovo945	; __; __; __; __; __; __		__	__	__	__	__	__	1	1	NA	NA	NA	0	0	0	0	0	3	0	0	0	0	0	0	0	0	0
denovo946	Bacteria; __Firmicutes; __Bacilli; __Lactobacillales; __Lactobacillaceae; __Lactobacillus; __Lactobacillus iners	Bacteria	__Firmicutes	__Bacilli	__Lactobacillales	__Lactobacillaceae	__Lactobacillus	__Lactobacillus iners	1	1	NR_036982.1	NA	NA	0	0	0	0	0	0	0	0	0	0	0	0	0	0	3
denovo947	Bacteria; __Bacteroidetes; __Flavobacteriia; __Flavobacteriales; __Flavobacteriaceae; __Olleya; __Olleya algicola	Bacteria	__Bacteroidetes	__Flavobacteriia	__Flavobacteriales	__Flavobacteriaceae	__Olleya	__Olleya algicola	1	1	NR_157624.1	NA	NA	0	3	0	0	0	0	0	0	0	0	0	0	0	0	0
denovo948	Bacteria; __Proteobacteria; __Gammaproteobacteria; __Chromatiales; __Ectothiorhodospiraceae; __Thioalkalivibrio; __Thioalkalivibrio versutus	Bacteria	__Proteobacteria	__Gammaproteobacteria	__Chromatiales	__Ectothiorhodospiraceae	__Thioalkalivibrio	__Thioalkalivibrio versutus	1	1	NR_024990.1	NA	NA	0	0	2	0	0	0	0	0	1	0	0	0	0	0	0
denovo949	Bacteria; __Proteobacteria; __Alphaproteobacteria; __Rhizobiales; __Hyphomicrobiaceae; __Devosia; __Devosia lucknowensis	Bacteria	__Proteobacteria	__Alphaproteobacteria	__Rhizobiales	__Hyphomicrobiaceae	__Devosia	__Devosia lucknowensis	1	1	NR_132697.1	NA	NA	0	0	0	0	0	0	0	0	0	0	0	0	0	0	3
denovo950	Bacteria; __Proteobacteria; __Deltaproteobacteria; __Desulfuromonadales; __Desulfuromonadaceae; __Desulfuromonas; __Desulfuromonas acetexigens	Bacteria	__Proteobacteria	__Deltaproteobacteria	__Desulfuromonadales	__Desulfuromonadaceae	__Desulfuromonas	__Desulfuromonas acetexigens	1	1	NR_044770.1	NA	NA	0	0	0	0	0	0	0	0	0	0	0	0	3	6	0
denovo951	Bacteria; __Proteobacteria; __Alphaproteobacteria; __Pelagibacterales; __Pelagibacteraceae; __Candidatus Pelagibacter; __Candidatus Pelagibacter ubique	Bacteria	__Proteobacteria	__Alphaproteobacteria	__Pelagibacterales	__Pelagibacteraceae	__Candidatus Pelagibacter	__Candidatus Pelagibacter ubique	1	1	NR_074224.1	NA	NA	0	0	0	0	0	0	0	0	0	0	0	0	3	0	0
denovo952	Bacteria; __Proteobacteria; __Gammaproteobacteria; __Alteromonadales; __Alteromonadaceae; __Alkalimarinus; __Alkalimarinus sediminis	Bacteria	__Proteobacteria	__Gammaproteobacteria	__Alteromonadales	__Alteromonadaceae	__Alkalimarinus	__Alkalimarinus sediminis	1	1	NR_137384.1	NA	NA	0	0	0	0	0	0	0	0	0	0	0	0	0	3	0
denovo953	; __; __; __; __; __; __		__	__	__	__	__	__	1	1	NA	NA	NA	0	0	0	0	0	0	0	0	0	0	0	2	1	0	0
denovo954	Bacteria; __Proteobacteria; __Alphaproteobacteria; __Rhodobacterales; __Rhodobacteraceae; __Litoreibacter; __Litoreibacter ponti	Bacteria	__Proteobacteria	__Alphaproteobacteria	__Rhodobacterales	__Rhodobacteraceae	__Litoreibacter	__Litoreibacter ponti	1	1	NR_134069.1	NA	NA	0	0	0	0	1	0	0	0	3	0	1	0	0	4	0
denovo955	Bacteria; __Proteobacteria; __Alphaproteobacteria; __Rhodospirillales; __Rhodospirillaceae; __Limibacillus; __Limibacillus halophilus	Bacteria	__Proteobacteria	__Alphaproteobacteria	__Rhodospirillales	__Rhodospirillaceae	__Limibacillus	__Limibacillus halophilus	1	1	NR_137248.1	NA	NA	0	0	0	0	0	2	0	0	0	0	0	0	0	7	0
denovo956	Bacteria; __Proteobacteria; __Alphaproteobacteria; __Rhodobacterales; __Rhodobacteraceae; __Amylibacter; __Amylibacter cionae	Bacteria	__Proteobacteria	__Alphaproteobacteria	__Rhodobacterales	__Rhodobacteraceae	__Amylibacter	__Amylibacter cionae	1	1	NR_158032.1	NA	NA	0	0	0	0	0	0	0	0	0	0	0	0	0	3	0
denovo957	Bacteria; __Actinobacteria; __Actinobacteria; __Corynebacteriales; __Corynebacteriaceae; __Corynebacterium; __Corynebacterium vitaeruminis	Bacteria	__Actinobacteria	__Actinobacteria	__Corynebacteriales	__Corynebacteriaceae	__Corynebacterium	__Corynebacterium vitaeruminis	1	1	NR_121721.1	NA	NA	1	0	0	0	0	0	0	0	0	0	0	0	0	0	8
denovo958	Bacteria; __Cyanobacteria; __; __Pleurocapsales; __Dermocarpellaceae; __Stanieria; __Stanieria cyanosphaera	Bacteria	__Cyanobacteria	__	__Pleurocapsales	__Dermocarpellaceae	__Stanieria	__Stanieria cyanosphaera	1	1	NR_102468.1	NA	NA	0	0	0	0	0	0	3	0	0	0	0	0	0	0	0
denovo959	Bacteria; __Cyanobacteria; __; __Pleurocapsales; __Xenococcaceae; __Foliisarcina; __Foliisarcina bertiogensis	Bacteria	__Cyanobacteria	__	__Pleurocapsales	__Xenococcaceae	__Foliisarcina	__Foliisarcina bertiogensis	1	1	NR_148664.1	NA	NA	0	0	0	3	0	0	0	0	0	0	0	0	0	0	0
denovo960	Bacteria; __Bacteroidetes; __Flavobacteriia; __Flavobacteriales; __Flavobacteriaceae; __Polaribacter; __Polaribacter litorisediminis	Bacteria	__Bacteroidetes	__Flavobacteriia	__Flavobacteriales	__Flavobacteriaceae	__Polaribacter	__Polaribacter litorisediminis	1	1	NR_156971.1	NA	NA	0	0	0	3	0	0	0	0	0	0	0	0	0	0	0
denovo961	Bacteria; __Cyanobacteria; __; __Nostocales; __Calotrichaceae; __Dulcicalothrix; __Dulcicalothrix necridiiformans	Bacteria	__Cyanobacteria	__	__Nostocales	__Calotrichaceae	__Dulcicalothrix	__Dulcicalothrix necridiiformans	1	1	NR_164867.1	NA	NA	0	0	0	0	0	0	0	0	0	0	0	0	3	0	0
denovo962	Bacteria; __Proteobacteria; __Gammaproteobacteria; __Cellvibrionales; __Spongiibacteraceae; __Dasania; __Dasania marina	Bacteria	__Proteobacteria	__Gammaproteobacteria	__Cellvibrionales	__Spongiibacteraceae	__Dasania	__Dasania marina	1	1	NR_043175.1	NA	NA	0	0	3	0	0	0	0	0	0	0	0	0	0	0	0
denovo963	Bacteria; __Cyanobacteria; __; __Synechococcales; __Prochloraceae; __Prochlorococcus; __Prochlorococcus marinus	Bacteria	__Cyanobacteria	__	__Synechococcales	__Prochloraceae	__Prochlorococcus	__Prochlorococcus marinus	1	1	NR_125480.1	NA	NA	0	0	0	0	0	0	0	0	0	0	0	3	0	0	0
denovo964	Bacteria; __Bacteroidetes; __Flavobacteriia; __Flavobacteriales; __Crocinitomicaceae; __Lishizhenia; __Lishizhenia tianjinensis	Bacteria	__Bacteroidetes	__Flavobacteriia	__Flavobacteriales	__Crocinitomicaceae	__Lishizhenia	__Lishizhenia tianjinensis	1	1	NR_116229.1	NA	NA	0	0	0	0	0	0	0	0	0	0	0	0	3	0	0
denovo965	Bacteria; __Verrucomicrobia; __Verrucomicrobiae; __Verrucomicrobiales; __Verrucomicrobiaceae; __Fucophilus; __Fucophilus fucoidanolyticus	Bacteria	__Verrucomicrobia	__Verrucomicrobiae	__Verrucomicrobiales	__Verrucomicrobiaceae	__Fucophilus	__Fucophilus fucoidanolyticus	1	1	NR_112167.1	NA	NA	0	0	0	0	0	0	0	0	0	0	0	3	0	0	0
denovo966	; __; __; __; __; __; __		__	__	__	__	__	__	1	1	NA	NA	NA	2	0	0	1	0	0	3	0	0	0	0	0	0	0	0
denovo967	Bacteria; __Proteobacteria; __Gammaproteobacteria; __Alteromonadales; __Colwelliaceae; __Thalassotalea; __Thalassotalea litorea	Bacteria	__Proteobacteria	__Gammaproteobacteria	__Alteromonadales	__Colwelliaceae	__Thalassotalea	__Thalassotalea litorea	1	1	NR_157659.1	NA	NA	3	0	0	0	0	0	0	0	0	0	0	0	0	0	0
denovo968	Bacteria; __Actinobacteria; __Actinobacteria; __Corynebacteriales; __Corynebacteriaceae; __Corynebacterium; __Corynebacterium glaucum	Bacteria	__Actinobacteria	__Actinobacteria	__Corynebacteriales	__Corynebacteriaceae	__Corynebacterium	__Corynebacterium glaucum	1	1	NR_028971.1	NA	NA	0	0	0	0	0	0	0	0	0	0	0	0	0	0	3
denovo969	Bacteria; __Cyanobacteria; __; __Nostocales; __Symphyonemataceae; __Loriellopsis; __Loriellopsis cavernicola	Bacteria	__Cyanobacteria	__	__Nostocales	__Symphyonemataceae	__Loriellopsis	__Loriellopsis cavernicola	1	1	NR_117881.1	NA	NA	0	0	0	0	0	0	0	0	0	0	0	0	0	0	3
denovo970	Bacteria; __Bacteroidetes; __Flavobacteriia; __Flavobacteriales; __Cryomorphaceae; __Owenweeksia; __Owenweeksia hongkongensis	Bacteria	__Bacteroidetes	__Flavobacteriia	__Flavobacteriales	__Cryomorphaceae	__Owenweeksia	__Owenweeksia hongkongensis	1	1	NR_074100.1	NA	NA	0	0	0	0	3	0	0	0	0	0	0	0	0	0	0
denovo971	Bacteria; __Bacteroidetes; __Flavobacteriia; __Flavobacteriales; __Flavobacteriaceae; __Polaribacter; __Polaribacter staleyi	Bacteria	__Bacteroidetes	__Flavobacteriia	__Flavobacteriales	__Flavobacteriaceae	__Polaribacter	__Polaribacter staleyi	1	1	NR_159336.1	NA	NA	0	0	0	0	0	0	0	0	0	3	0	0	0	0	0
denovo972	; __; __; __; __; __; __		__	__	__	__	__	__	1	1	NA	NA	NA	0	0	0	0	0	0	0	3	0	0	0	0	0	0	0
denovo973	Bacteria; __Cyanobacteria; __; __Synechococcales; __Synechococcaceae; __Synechococcus; __Synechococcus rubescens	Bacteria	__Cyanobacteria	__	__Synechococcales	__Synechococcaceae	__Synechococcus	__Synechococcus rubescens	1	1	NR_125481.1	NA	NA	0	0	0	0	0	0	0	0	0	0	0	3	0	0	0
denovo974	; __; __; __; __; __; __		__	__	__	__	__	__	1	1	NA	NA	NA	0	0	0	0	0	0	0	0	0	0	1	1	1	3	0
denovo975	Bacteria; __Proteobacteria; __Gammaproteobacteria; __Alteromonadales; __Pseudoalteromonadaceae; __Pseudoalteromonas; __Pseudoalteromonas haloplanktis	Bacteria	__Proteobacteria	__Gammaproteobacteria	__Alteromonadales	__Pseudoalteromonadaceae	__Pseudoalteromonas	__Pseudoalteromonas haloplanktis	1	1	NR_044837.2	NA	NA	0	0	0	0	0	0	0	0	0	0	0	3	0	0	0
denovo976	; __; __; __; __; __; __		__	__	__	__	__	__	1	1	NA	NA	NA	0	0	0	0	0	0	0	0	0	3	0	0	0	0	0
denovo977	Bacteria; __Verrucomicrobia; __Verrucomicrobiae; __Verrucomicrobiales; __Rubritaleaceae; __Rubritalea; __Rubritalea halochordaticola	Bacteria	__Verrucomicrobia	__Verrucomicrobiae	__Verrucomicrobiales	__Rubritaleaceae	__Rubritalea	__Rubritalea halochordaticola	1	1	NR_113049.1	NA	NA	0	0	0	0	0	3	0	0	0	0	0	0	0	0	0
denovo978	Bacteria; __Fusobacteria; __Fusobacteriia; __Fusobacteriales; __Fusobacteriaceae; __Fusobacterium; __Fusobacterium mortiferum	Bacteria	__Fusobacteria	__Fusobacteriia	__Fusobacteriales	__Fusobacteriaceae	__Fusobacterium	__Fusobacterium mortiferum	1	1	NR_117734.1	NA	NA	0	0	2	0	0	0	1	0	0	0	0	0	0	0	0
denovo979	Bacteria; __Proteobacteria; __Alphaproteobacteria; __Rhodobacterales; __Rhodobacteraceae; __Lentibacter; __Lentibacter algarum	Bacteria	__Proteobacteria	__Alphaproteobacteria	__Rhodobacterales	__Rhodobacteraceae	__Lentibacter	__Lentibacter algarum	1	1	NR_108333.1	NA	NA	0	0	0	0	0	0	0	0	0	0	0	3	0	0	0
denovo980	Bacteria; __Actinobacteria; __Acidimicrobiia; __Acidimicrobiales; __Acidimicrobiaceae; __Aciditerrimonas; __Aciditerrimonas ferrireducens	Bacteria	__Actinobacteria	__Acidimicrobiia	__Acidimicrobiales	__Acidimicrobiaceae	__Aciditerrimonas	__Aciditerrimonas ferrireducens	1	1	NR_112972.1	NA	NA	0	0	1	0	0	2	0	0	0	0	0	0	0	0	0
denovo981	Bacteria; __Firmicutes; __Bacilli; __Bacillales; __; __Exiguobacterium; __Exiguobacterium artemiae	Bacteria	__Firmicutes	__Bacilli	__Bacillales	__	__Exiguobacterium	__Exiguobacterium artemiae	1	1	NR_114970.2	NA	NA	0	0	0	0	0	0	0	0	0	0	0	0	0	0	3
denovo982	Bacteria; __Cyanobacteria; __; __Pleurocapsales; __Xenococcaceae; __Foliisarcina; __Foliisarcina bertiogensis	Bacteria	__Cyanobacteria	__	__Pleurocapsales	__Xenococcaceae	__Foliisarcina	__Foliisarcina bertiogensis	1	1	NR_148664.1	NA	NA	0	0	0	0	0	0	0	0	0	3	0	0	0	0	0
denovo983	; __; __; __; __; __; __		__	__	__	__	__	__	1	1	NA	NA	NA	0	0	0	3	0	0	0	0	0	0	0	0	0	0	0
denovo984	Bacteria; __Cyanobacteria; __; __Pleurocapsales; __Dermocarpellaceae; __Stanieria; __Stanieria cyanosphaera	Bacteria	__Cyanobacteria	__	__Pleurocapsales	__Dermocarpellaceae	__Stanieria	__Stanieria cyanosphaera	1	1	NR_102468.1	NA	NA	0	0	0	0	0	0	0	0	0	3	0	0	0	0	0
denovo985	Bacteria; __Verrucomicrobia; __Verrucomicrobiae; __Verrucomicrobiales; __Verrucomicrobiaceae; __Persicirhabdus; __Persicirhabdus sediminis	Bacteria	__Verrucomicrobia	__Verrucomicrobiae	__Verrucomicrobiales	__Verrucomicrobiaceae	__Persicirhabdus	__Persicirhabdus sediminis	1	1	NR_041620.1	NA	NA	0	0	0	0	0	0	0	0	0	0	0	0	3	0	0
denovo986	; __; __; __; __; __; __		__	__	__	__	__	__	1	1	NA	NA	NA	0	0	0	0	0	0	0	3	0	0	0	0	0	0	0
denovo987	; __; __; __; __; __; __		__	__	__	__	__	__	1	1	NA	NA	NA	0	0	3	0	0	0	0	0	0	0	0	0	0	0	0
denovo988	Bacteria; __Cyanobacteria; __; __Oscillatoriales; __Oscillatoriaceae; __Oscillatoria; __Oscillatoria acuminata	Bacteria	__Cyanobacteria	__	__Oscillatoriales	__Oscillatoriaceae	__Oscillatoria	__Oscillatoria acuminata	1	1	NR_102463.1	NA	NA	0	0	0	0	0	0	0	0	0	1	1	0	1	0	0
denovo989	Bacteria; __Bacteroidetes; __Flavobacteriia; __Flavobacteriales; __Flavobacteriaceae; __Aquibacter; __Aquibacter zeaxanthinifaciens	Bacteria	__Bacteroidetes	__Flavobacteriia	__Flavobacteriales	__Flavobacteriaceae	__Aquibacter	__Aquibacter zeaxanthinifaciens	1	1	NR_125631.1	NA	NA	0	0	0	0	3	0	0	0	0	0	0	0	0	0	0
denovo990	Bacteria; __Proteobacteria; __Gammaproteobacteria; __Alteromonadales; __Pseudoalteromonadaceae; __Algicola; __Algicola sagamiensis	Bacteria	__Proteobacteria	__Gammaproteobacteria	__Alteromonadales	__Pseudoalteromonadaceae	__Algicola	__Algicola sagamiensis	1	1	NR_027234.1	NA	NA	0	0	0	0	0	3	0	0	0	0	0	0	0	0	0
denovo991	Bacteria; __Proteobacteria; __Gammaproteobacteria; __Alteromonadales; __Alteromonadaceae; __Paraglaciecola; __Paraglaciecola aestuariivivens	Bacteria	__Proteobacteria	__Gammaproteobacteria	__Alteromonadales	__Alteromonadaceae	__Paraglaciecola	__Paraglaciecola aestuariivivens	1	1	NR_159183.1	NA	NA	0	0	0	0	0	0	6	0	0	0	0	0	0	0	0
denovo992	; __; __; __; __; __; __		__	__	__	__	__	__	1	1	NA	NA	NA	0	0	0	0	0	0	0	0	0	0	3	0	0	0	0
denovo993	Bacteria; __Firmicutes; __Clostridia; __Clostridiales; __Peptostreptococcaceae; __Filifactor; __Filifactor alocis	Bacteria	__Firmicutes	__Clostridia	__Clostridiales	__Peptostreptococcaceae	__Filifactor	__Filifactor alocis	1	1	NR_074645.1	NA	NA	0	0	0	0	0	0	0	0	0	0	0	0	0	0	9
denovo994	Bacteria; __Proteobacteria; __Alphaproteobacteria; __Rhodobacterales; __Rhodobacteraceae; __Aliiroseovarius; __Aliiroseovarius sediminilitoris	Bacteria	__Proteobacteria	__Alphaproteobacteria	__Rhodobacterales	__Rhodobacteraceae	__Aliiroseovarius	__Aliiroseovarius sediminilitoris	1	1	NR_109620.1	NA	NA	0	0	0	0	0	0	0	0	0	3	0	0	0	0	0
denovo995	Bacteria; __Bacteroidetes; __Flavobacteriia; __Flavobacteriales; __Flavobacteriaceae; __Joostella; __Joostella marina	Bacteria	__Bacteroidetes	__Flavobacteriia	__Flavobacteriales	__Flavobacteriaceae	__Joostella	__Joostella marina	1	1	NR_044346.1	NA	NA	0	0	0	0	0	0	0	0	3	0	0	0	0	0	0
denovo996	Bacteria; __Proteobacteria; __Gammaproteobacteria; __Chromatiales; __; __Thiohalobacter; __Thiohalobacter thiocyanaticus	Bacteria	__Proteobacteria	__Gammaproteobacteria	__Chromatiales	__	__Thiohalobacter	__Thiohalobacter thiocyanaticus	1	1	NR_116699.1	NA	NA	3	0	0	0	0	0	0	0	0	0	0	0	0	0	0
denovo997	Bacteria; __Actinobacteria; __Actinobacteria; __Micrococcales; __Brevibacteriaceae; __Brevibacterium; __Brevibacterium casei	Bacteria	__Actinobacteria	__Actinobacteria	__Micrococcales	__Brevibacteriaceae	__Brevibacterium	__Brevibacterium casei	1	1	NR_041996.1	NA	NA	5	0	0	0	0	0	0	0	0	0	0	0	0	0	4
denovo998	Bacteria; __Proteobacteria; __Gammaproteobacteria; __; __; __Pseudohongiella; __Pseudohongiella nitratireducens	Bacteria	__Proteobacteria	__Gammaproteobacteria	__	__	__Pseudohongiella	__Pseudohongiella nitratireducens	1	1	NR_153732.1	NA	NA	0	0	0	0	0	0	0	0	0	3	0	0	0	0	0
denovo999	Bacteria; __Proteobacteria; __Gammaproteobacteria; __Alteromonadales; __Alteromonadaceae; __Marinobacter; __Marinobacter adhaerens	Bacteria	__Proteobacteria	__Gammaproteobacteria	__Alteromonadales	__Alteromonadaceae	__Marinobacter	__Marinobacter adhaerens	1	1	NR_074765.1	NA	NA	0	0	0	0	0	0	0	0	0	3	0	0	0	0	0
denovo1000	Bacteria; __Cyanobacteria; __; __Synechococcales; __Prochloraceae; __Prochlorococcus; __Prochlorococcus marinus	Bacteria	__Cyanobacteria	__	__Synechococcales	__Prochloraceae	__Prochlorococcus	__Prochlorococcus marinus	1	1	NR_125480.1	NA	NA	0	0	0	0	0	0	0	0	0	3	0	0	0	0	0
denovo1001	Bacteria; __Proteobacteria; __Gammaproteobacteria; __Alteromonadales; __Alteromonadaceae; __Alkalimarinus; __Alkalimarinus sediminis	Bacteria	__Proteobacteria	__Gammaproteobacteria	__Alteromonadales	__Alteromonadaceae	__Alkalimarinus	__Alkalimarinus sediminis	1	1	NR_137384.1	NA	NA	0	0	0	0	0	0	0	0	0	3	0	0	0	3	0
denovo1002	Bacteria; __Proteobacteria; __Alphaproteobacteria; __Rhodobacterales; __Rhodobacteraceae; __Sulfitobacter; __Sulfitobacter donghicola	Bacteria	__Proteobacteria	__Alphaproteobacteria	__Rhodobacterales	__Rhodobacteraceae	__Sulfitobacter	__Sulfitobacter donghicola	1	1	NR_044164.1	NA	NA	0	0	0	3	0	0	0	0	0	0	0	0	0	0	0
denovo1003	Bacteria; __Bacteroidetes; __Flavobacteriia; __Flavobacteriales; __Cryomorphaceae; __Owenweeksia; __Owenweeksia hongkongensis	Bacteria	__Bacteroidetes	__Flavobacteriia	__Flavobacteriales	__Cryomorphaceae	__Owenweeksia	__Owenweeksia hongkongensis	1	1	NR_074100.1	NA	NA	0	0	1	0	0	0	0	0	2	0	0	0	0	0	0
denovo1004	Bacteria; __Proteobacteria; __Gammaproteobacteria; __Pseudomonadales; __Pseudomonadaceae; __Pseudomonas; __Pseudomonas zhaodongensis	Bacteria	__Proteobacteria	__Gammaproteobacteria	__Pseudomonadales	__Pseudomonadaceae	__Pseudomonas	__Pseudomonas zhaodongensis	1	1	NR_134795.1	NA	NA	3	0	0	0	0	0	0	0	0	0	0	0	0	0	0
denovo1005	; __; __; __; __; __; __		__	__	__	__	__	__	1	1	NA	NA	NA	0	1	0	0	0	2	0	0	0	0	0	0	0	0	0
denovo1006	Bacteria; __Proteobacteria; __Alphaproteobacteria; __Pelagibacterales; __Pelagibacteraceae; __Candidatus Pelagibacter; __Candidatus Pelagibacter ubique	Bacteria	__Proteobacteria	__Alphaproteobacteria	__Pelagibacterales	__Pelagibacteraceae	__Candidatus Pelagibacter	__Candidatus Pelagibacter ubique	1	1	NR_074224.1	NA	NA	0	0	0	0	3	0	0	0	0	0	0	0	0	0	0
denovo1007	Bacteria; __Proteobacteria; __Betaproteobacteria; __Burkholderiales; __Comamonadaceae; __Pelomonas; __Pelomonas saccharophila	Bacteria	__Proteobacteria	__Betaproteobacteria	__Burkholderiales	__Comamonadaceae	__Pelomonas	__Pelomonas saccharophila	1	1	NR_114189.1	NA	NA	0	0	0	0	0	0	0	0	0	0	0	0	0	0	3
denovo1008	Bacteria; __Cyanobacteria; __; __Nostocales; __Calotrichaceae; __Dulcicalothrix; __Dulcicalothrix necridiiformans	Bacteria	__Cyanobacteria	__	__Nostocales	__Calotrichaceae	__Dulcicalothrix	__Dulcicalothrix necridiiformans	1	1	NR_164867.1	NA	NA	0	0	3	0	1	1	0	0	1	0	0	0	0	0	0
denovo1009	Bacteria; __Bacteroidetes; __Flavobacteriia; __Flavobacteriales; __Cryomorphaceae; __Owenweeksia; __Owenweeksia hongkongensis	Bacteria	__Bacteroidetes	__Flavobacteriia	__Flavobacteriales	__Cryomorphaceae	__Owenweeksia	__Owenweeksia hongkongensis	1	1	NR_074100.1	NA	NA	0	0	0	0	4	0	0	0	0	0	0	0	2	0	0
denovo1010	Bacteria; __Cyanobacteria; __; __Nostocales; __Calotrichaceae; __Dulcicalothrix; __Dulcicalothrix necridiiformans	Bacteria	__Cyanobacteria	__	__Nostocales	__Calotrichaceae	__Dulcicalothrix	__Dulcicalothrix necridiiformans	1	1	NR_164867.1	NA	NA	0	0	0	0	0	0	0	0	0	3	0	0	0	0	0
denovo1011	Bacteria; __Proteobacteria; __Gammaproteobacteria; __Oceanospirillales; __Oceanospirillaceae; __Oceanospirillum; __Oceanospirillum multiglobuliferum	Bacteria	__Proteobacteria	__Gammaproteobacteria	__Oceanospirillales	__Oceanospirillaceae	__Oceanospirillum	__Oceanospirillum multiglobuliferum	1	1	NR_113624.1	NA	NA	0	0	0	0	3	0	0	0	0	0	0	0	0	0	0
denovo1012	Bacteria; __Cyanobacteria; __; __Pleurocapsales; __Xenococcaceae; __Foliisarcina; __Foliisarcina bertiogensis	Bacteria	__Cyanobacteria	__	__Pleurocapsales	__Xenococcaceae	__Foliisarcina	__Foliisarcina bertiogensis	1	1	NR_148664.1	NA	NA	0	0	0	0	0	0	3	0	0	0	0	0	0	0	0
denovo1013	Bacteria; __Cyanobacteria; __; __Pleurocapsales; __Xenococcaceae; __Foliisarcina; __Foliisarcina bertiogensis	Bacteria	__Cyanobacteria	__	__Pleurocapsales	__Xenococcaceae	__Foliisarcina	__Foliisarcina bertiogensis	1	1	NR_148664.1	NA	NA	0	0	0	0	0	0	0	0	0	1	0	2	0	0	0
denovo1014	Bacteria; __Proteobacteria; __Gammaproteobacteria; __Cellvibrionales; __Halieaceae; __Luminiphilus; __Luminiphilus syltensis	Bacteria	__Proteobacteria	__Gammaproteobacteria	__Cellvibrionales	__Halieaceae	__Luminiphilus	__Luminiphilus syltensis	1	1	NR_125526.1	NA	NA	3	0	0	0	0	0	0	0	0	0	0	0	0	0	0
denovo1015	; __; __; __; __; __; __		__	__	__	__	__	__	1	1	NA	NA	NA	0	0	0	0	0	0	0	0	0	0	0	0	0	3	0
denovo1016	Bacteria; __Proteobacteria; __Alphaproteobacteria; __Rhizobiales; __Methylobacteriaceae; __Methylorubrum; __Methylorubrum populi	Bacteria	__Proteobacteria	__Alphaproteobacteria	__Rhizobiales	__Methylobacteriaceae	__Methylorubrum	__Methylorubrum populi	1	1	NR_074257.1	NA	NA	0	0	0	0	0	0	0	0	0	0	0	0	0	0	12
denovo1017	Bacteria; __Proteobacteria; __Gammaproteobacteria; __Cellvibrionales; __Porticoccaceae; __Porticoccus; __Porticoccus hydrocarbonoclasticus	Bacteria	__Proteobacteria	__Gammaproteobacteria	__Cellvibrionales	__Porticoccaceae	__Porticoccus	__Porticoccus hydrocarbonoclasticus	1	1	NR_118247.1	NA	NA	0	0	0	3	0	0	0	0	0	0	0	0	0	0	0
denovo1018	Bacteria; __Proteobacteria; __Gammaproteobacteria; __Cellvibrionales; __Porticoccaceae; __Porticoccus; __Porticoccus hydrocarbonoclasticus	Bacteria	__Proteobacteria	__Gammaproteobacteria	__Cellvibrionales	__Porticoccaceae	__Porticoccus	__Porticoccus hydrocarbonoclasticus	1	1	NR_118247.1	NA	NA	0	0	0	0	3	0	0	0	0	0	0	0	0	0	0
denovo1019	Bacteria; __Bacteroidetes; __Flavobacteriia; __Flavobacteriales; __Cryomorphaceae; __Vicingus; __Vicingus serpentipes	Bacteria	__Bacteroidetes	__Flavobacteriia	__Flavobacteriales	__Cryomorphaceae	__Vicingus	__Vicingus serpentipes	1	1	NR_159281.1	NA	NA	0	0	0	0	0	0	0	0	0	0	0	0	3	0	0
denovo1020	Bacteria; __Proteobacteria; __Alphaproteobacteria; __Rhodospirillales; __Rhodospirillaceae; __Taonella; __Taonella mepensis	Bacteria	__Proteobacteria	__Alphaproteobacteria	__Rhodospirillales	__Rhodospirillaceae	__Taonella	__Taonella mepensis	1	1	NR_132292.1	NA	NA	0	0	1	0	0	1	0	0	0	0	0	0	0	7	0
denovo1021	Bacteria; __Proteobacteria; __Alphaproteobacteria; __Rhodobacterales; __Hyphomonadaceae; __Robiginitomaculum; __Robiginitomaculum antarcticum	Bacteria	__Proteobacteria	__Alphaproteobacteria	__Rhodobacterales	__Hyphomonadaceae	__Robiginitomaculum	__Robiginitomaculum antarcticum	1	1	NR_114202.1	NA	NA	0	0	0	0	0	0	0	0	0	3	0	0	0	0	0
denovo1022	Bacteria; __Proteobacteria; __Betaproteobacteria; __Burkholderiales; __Comamonadaceae; __Rhodoferax; __Rhodoferax ferrireducens	Bacteria	__Proteobacteria	__Betaproteobacteria	__Burkholderiales	__Comamonadaceae	__Rhodoferax	__Rhodoferax ferrireducens	1	1	NR_074760.1	NA	NA	0	0	0	0	0	0	0	0	0	0	0	0	0	0	3
denovo1023	Bacteria; __Proteobacteria; __Alphaproteobacteria; __Rhodobacterales; __Rhodobacteraceae; __Octadecabacter; __Octadecabacter antarcticus	Bacteria	__Proteobacteria	__Alphaproteobacteria	__Rhodobacterales	__Rhodobacteraceae	__Octadecabacter	__Octadecabacter antarcticus	1	1	NR_027580.1	NA	NA	0	0	0	0	0	0	0	0	0	0	0	0	0	3	0
denovo1024	Bacteria; __Proteobacteria; __Alphaproteobacteria; __Rhodobacterales; __Rhodobacteraceae; __Amylibacter; __Amylibacter ulvae	Bacteria	__Proteobacteria	__Alphaproteobacteria	__Rhodobacterales	__Rhodobacteraceae	__Amylibacter	__Amylibacter ulvae	1	1	NR_146351.1	NA	NA	0	0	0	0	3	0	0	0	0	0	0	0	0	0	0
denovo1025	Bacteria; __Firmicutes; __Bacilli; __Bacillales; __Staphylococcaceae; __Macrococcus; __Macrococcus brunensis	Bacteria	__Firmicutes	__Bacilli	__Bacillales	__Staphylococcaceae	__Macrococcus	__Macrococcus brunensis	1	1	NR_036847.1	NA	NA	3	0	0	0	0	0	0	0	0	0	0	0	0	0	0
denovo1026	Bacteria; __Nitrospinae; __Nitrospinia; __Nitrospinales; __Nitrospinaceae; __Nitrospina; __Nitrospina gracilis	Bacteria	__Nitrospinae	__Nitrospinia	__Nitrospinales	__Nitrospinaceae	__Nitrospina	__Nitrospina gracilis	1	1	NR_104821.1	NA	NA	0	0	0	0	0	0	0	0	0	0	0	0	0	3	0
denovo1027	Bacteria; __Cyanobacteria; __; __Nostocales; __Scytonemataceae; __Brasilonema; __Brasilonema tolantongensis	Bacteria	__Cyanobacteria	__	__Nostocales	__Scytonemataceae	__Brasilonema	__Brasilonema tolantongensis	1	1	NR_118308.1	NA	NA	0	0	0	3	2	0	1	0	0	0	0	0	0	0	0
denovo1028	Bacteria; __Proteobacteria; __Alphaproteobacteria; __Emcibacterales; __Emcibacteraceae; __Emcibacter; __Emcibacter nanhaiensis	Bacteria	__Proteobacteria	__Alphaproteobacteria	__Emcibacterales	__Emcibacteraceae	__Emcibacter	__Emcibacter nanhaiensis	1	1	NR_136430.1	NA	NA	0	0	0	0	0	0	0	0	0	3	0	0	0	0	0
denovo1029	Bacteria; __Proteobacteria; __Gammaproteobacteria; __Alteromonadales; __Alteromonadaceae; __Paraglaciecola; __Paraglaciecola psychrophila	Bacteria	__Proteobacteria	__Gammaproteobacteria	__Alteromonadales	__Alteromonadaceae	__Paraglaciecola	__Paraglaciecola psychrophila	1	1	NR_043463.1	NA	NA	0	0	0	3	0	0	0	0	0	0	0	0	0	0	0
denovo1030	Bacteria; __Proteobacteria; __Gammaproteobacteria; __Pseudomonadales; __Pseudomonadaceae; __Pseudomonas; __Pseudomonas reidholzensis	Bacteria	__Proteobacteria	__Gammaproteobacteria	__Pseudomonadales	__Pseudomonadaceae	__Pseudomonas	__Pseudomonas reidholzensis	1	1	NR_157777.1	NA	NA	0	0	0	0	0	0	0	3	0	0	0	0	0	0	0
denovo1031	Bacteria; __Deinococcus-Thermus; __Deinococci; __Deinococcales; __Deinococcaceae; __Deinococcus; __Deinococcus marmoris	Bacteria	__Deinococcus-Thermus	__Deinococci	__Deinococcales	__Deinococcaceae	__Deinococcus	__Deinococcus marmoris	1	1	NR_042210.1	NA	NA	0	0	1	0	0	0	0	0	0	0	0	0	0	0	2
denovo1032	; __; __; __; __; __; __		__	__	__	__	__	__	1	1	NA	NA	NA	0	0	0	0	0	0	0	0	0	0	0	3	0	0	0
denovo1033	Bacteria; __Proteobacteria; __Gammaproteobacteria; __Alteromonadales; __Colwelliaceae; __Colwellia; __Colwellia asteriadis	Bacteria	__Proteobacteria	__Gammaproteobacteria	__Alteromonadales	__Colwelliaceae	__Colwellia	__Colwellia asteriadis	1	1	NR_116385.1	NA	NA	0	0	0	0	0	0	3	0	0	0	0	0	0	0	0
denovo1034	Bacteria; __Proteobacteria; __Gammaproteobacteria; __Cellvibrionales; __Porticoccaceae; __Porticoccus; __Porticoccus hydrocarbonoclasticus	Bacteria	__Proteobacteria	__Gammaproteobacteria	__Cellvibrionales	__Porticoccaceae	__Porticoccus	__Porticoccus hydrocarbonoclasticus	1	1	NR_118247.1	NA	NA	0	0	0	0	0	0	3	0	0	0	0	0	0	0	0
denovo1035	Bacteria; __Bacteroidetes; __Flavobacteriia; __Flavobacteriales; __Flavobacteriaceae; __Wenyingzhuangia; __Wenyingzhuangia marina	Bacteria	__Bacteroidetes	__Flavobacteriia	__Flavobacteriales	__Flavobacteriaceae	__Wenyingzhuangia	__Wenyingzhuangia marina	1	1	NR_125625.1	NA	NA	0	0	0	0	0	0	0	0	0	0	0	0	1	2	0
denovo1036	Bacteria; __Proteobacteria; __Alphaproteobacteria; __Pelagibacterales; __Pelagibacteraceae; __Candidatus Pelagibacter; __Candidatus Pelagibacter ubique	Bacteria	__Proteobacteria	__Alphaproteobacteria	__Pelagibacterales	__Pelagibacteraceae	__Candidatus Pelagibacter	__Candidatus Pelagibacter ubique	1	1	NR_074224.1	NA	NA	0	0	0	0	0	0	0	0	0	0	0	0	0	3	0
denovo1037	Bacteria; __Proteobacteria; __Alphaproteobacteria; __Sphingomonadales; __Erythrobacteraceae; __Altererythrobacter; __Altererythrobacter sediminis	Bacteria	__Proteobacteria	__Alphaproteobacteria	__Sphingomonadales	__Erythrobacteraceae	__Altererythrobacter	__Altererythrobacter sediminis	1	1	NR_153743.1	NA	NA	0	0	1	0	0	0	0	0	0	0	2	0	0	0	0
denovo1038	; __; __; __; __; __; __		__	__	__	__	__	__	1	1	NA	NA	NA	0	0	0	0	0	0	0	0	0	3	0	0	0	0	0
denovo1039	Bacteria; __Proteobacteria; __Gammaproteobacteria; __Oceanospirillales; __Oceanospirillaceae; __Marinomonas; __Marinomonas vaga	Bacteria	__Proteobacteria	__Gammaproteobacteria	__Oceanospirillales	__Oceanospirillaceae	__Marinomonas	__Marinomonas vaga	1	1	NR_114183.1	NA	NA	0	0	0	0	0	0	0	0	0	0	0	0	2	1	0
denovo1040	Bacteria; __Proteobacteria; __Alphaproteobacteria; __Sphingomonadales; __Sphingomonadaceae; __Sphingobium; __Sphingobium limneticum	Bacteria	__Proteobacteria	__Alphaproteobacteria	__Sphingomonadales	__Sphingomonadaceae	__Sphingobium	__Sphingobium limneticum	1	1	NR_159251.1	NA	NA	0	0	3	0	0	2	0	0	0	0	0	0	0	1	0
denovo1041	Bacteria; __Bacteroidetes; __Flavobacteriia; __Flavobacteriales; __Flavobacteriaceae; __Polaribacter; __Polaribacter atrinae	Bacteria	__Bacteroidetes	__Flavobacteriia	__Flavobacteriales	__Flavobacteriaceae	__Polaribacter	__Polaribacter atrinae	1	1	NR_133820.1	NA	NA	3	0	0	0	0	0	0	0	0	0	0	0	0	0	0
denovo1042	Bacteria; __Proteobacteria; __Alphaproteobacteria; __Rhodobacterales; __Rhodobacteraceae; __Rubellimicrobium; __Rubellimicrobium roseum	Bacteria	__Proteobacteria	__Alphaproteobacteria	__Rhodobacterales	__Rhodobacteraceae	__Rubellimicrobium	__Rubellimicrobium roseum	1	1	NR_117433.1	NA	NA	0	0	0	0	0	0	0	0	0	0	0	0	0	0	3
denovo1043	Bacteria; __Proteobacteria; __Gammaproteobacteria; __Oceanospirillales; __Balneatrichaceae; __Balneatrix; __Balneatrix alpica	Bacteria	__Proteobacteria	__Gammaproteobacteria	__Oceanospirillales	__Balneatrichaceae	__Balneatrix	__Balneatrix alpica	1	1	NR_026465.1	NA	NA	0	0	0	0	0	0	0	0	3	0	0	0	0	0	0
denovo1044	; __; __; __; __; __; __		__	__	__	__	__	__	1	1	NA	NA	NA	0	0	0	0	0	0	0	0	0	3	0	0	0	0	0
denovo1045	Bacteria; __Firmicutes; __Negativicutes; __Veillonellales; __Veillonellaceae; __Dialister; __Dialister invisus	Bacteria	__Firmicutes	__Negativicutes	__Veillonellales	__Veillonellaceae	__Dialister	__Dialister invisus	1	1	NR_113355.1	NA	NA	0	0	0	0	0	0	0	0	0	0	0	0	0	0	3
denovo1046	Bacteria; __Actinobacteria; __Actinobacteria; __Micrococcales; __Micrococcaceae; __Arthrobacter; __Arthrobacter flavus	Bacteria	__Actinobacteria	__Actinobacteria	__Micrococcales	__Micrococcaceae	__Arthrobacter	__Arthrobacter flavus	1	1	NR_104688.1	NA	NA	0	0	0	0	3	0	0	0	0	0	0	0	0	0	0
denovo1047	; __; __; __; __; __; __		__	__	__	__	__	__	1	1	NA	NA	NA	0	0	2	0	0	0	0	0	1	0	0	0	0	0	0
denovo1048	; __; __; __; __; __; __		__	__	__	__	__	__	1	1	NA	NA	NA	0	0	0	0	3	0	0	0	0	0	0	0	0	0	0
denovo1049	Bacteria; __Proteobacteria; __Alphaproteobacteria; __Micropepsales; __Micropepsaceae; __Micropepsis; __Micropepsis pineolensis	Bacteria	__Proteobacteria	__Alphaproteobacteria	__Micropepsales	__Micropepsaceae	__Micropepsis	__Micropepsis pineolensis	1	1	NR_156848.1	NA	NA	0	0	3	0	0	0	0	0	0	0	0	0	0	0	0
denovo1050	Bacteria; __Proteobacteria; __Gammaproteobacteria; __Oceanospirillales; __Saccharospirillaceae; __Reinekea; __Reinekea aestuarii	Bacteria	__Proteobacteria	__Gammaproteobacteria	__Oceanospirillales	__Saccharospirillaceae	__Reinekea	__Reinekea aestuarii	1	1	NR_114294.1	NA	NA	0	0	0	3	0	0	0	0	0	0	0	0	0	0	0
denovo1051	Bacteria; __Proteobacteria; __Gammaproteobacteria; __Arenicellales; __Arenicellaceae; __Arenicella; __Arenicella xantha	Bacteria	__Proteobacteria	__Gammaproteobacteria	__Arenicellales	__Arenicellaceae	__Arenicella	__Arenicella xantha	1	1	NR_112914.1	NA	NA	0	0	0	1	0	0	2	1	2	0	0	0	0	0	0
denovo1052	Bacteria; __Proteobacteria; __Gammaproteobacteria; __Alteromonadales; __Colwelliaceae; __Colwellia; __Colwellia maris	Bacteria	__Proteobacteria	__Gammaproteobacteria	__Alteromonadales	__Colwelliaceae	__Colwellia	__Colwellia maris	1	1	NR_024635.1	NA	NA	0	0	0	0	0	0	1	0	0	0	0	0	2	0	0
denovo1053	Bacteria; __Proteobacteria; __Alphaproteobacteria; __Rhodospirillales; __Rhodospirillaceae; __Oceanibaculum; __Oceanibaculum nanhaiense	Bacteria	__Proteobacteria	__Alphaproteobacteria	__Rhodospirillales	__Rhodospirillaceae	__Oceanibaculum	__Oceanibaculum nanhaiense	1	1	NR_159190.1	NA	NA	0	0	2	0	0	0	0	0	1	0	0	0	0	0	0
denovo1054	Bacteria; __Proteobacteria; __Gammaproteobacteria; __Cellvibrionales; __Porticoccaceae; __Porticoccus; __Porticoccus hydrocarbonoclasticus	Bacteria	__Proteobacteria	__Gammaproteobacteria	__Cellvibrionales	__Porticoccaceae	__Porticoccus	__Porticoccus hydrocarbonoclasticus	1	1	NR_118247.1	NA	NA	0	0	0	0	0	0	0	3	0	0	0	0	0	0	0
denovo1055	Bacteria; __Proteobacteria; __Gammaproteobacteria; __Oceanospirillales; __Oceanospirillaceae; __Marinomonas; __Marinomonas fungiae	Bacteria	__Proteobacteria	__Gammaproteobacteria	__Oceanospirillales	__Oceanospirillaceae	__Marinomonas	__Marinomonas fungiae	1	1	NR_133775.1	NA	NA	0	0	0	0	0	0	0	3	0	0	0	0	0	0	0
denovo1056	Bacteria; __Actinobacteria; __Actinobacteria; __Corynebacteriales; __Nocardiaceae; __Williamsia; __Williamsia marianensis	Bacteria	__Actinobacteria	__Actinobacteria	__Corynebacteriales	__Nocardiaceae	__Williamsia	__Williamsia marianensis	1	1	NR_118613.1	NA	NA	0	0	0	0	0	0	0	0	0	0	0	0	0	0	3
denovo1057	; __; __; __; __; __; __		__	__	__	__	__	__	1	1	NA	NA	NA	0	0	0	0	0	0	0	0	0	0	0	0	0	3	0
denovo1058	Bacteria; __Firmicutes; __Bacilli; __Lactobacillales; __Aerococcaceae; __Aerococcus; __Aerococcus viridans	Bacteria	__Firmicutes	__Bacilli	__Lactobacillales	__Aerococcaceae	__Aerococcus	__Aerococcus viridans	1	1	NR_104708.1	NA	NA	3	0	0	0	0	0	0	0	0	0	0	0	0	0	0
denovo1059	Bacteria; __Proteobacteria; __Gammaproteobacteria; __Alteromonadales; __Alteromonadaceae; __Paraglaciecola; __Paraglaciecola arctica	Bacteria	__Proteobacteria	__Gammaproteobacteria	__Alteromonadales	__Alteromonadaceae	__Paraglaciecola	__Paraglaciecola arctica	1	1	NR_116288.1	NA	NA	0	0	0	0	3	0	0	0	0	0	0	0	0	0	0
denovo1060	; __; __; __; __; __; __		__	__	__	__	__	__	1	1	NA	NA	NA	0	4	1	0	0	0	0	0	1	0	0	0	0	0	0
denovo1061	Bacteria; __Bacteroidetes; __Saprospiria; __Saprospirales; __Saprospiraceae; __Saprospira; __Saprospira grandis	Bacteria	__Bacteroidetes	__Saprospiria	__Saprospirales	__Saprospiraceae	__Saprospira	__Saprospira grandis	1	1	NR_104966.1	NA	NA	0	0	1	0	0	0	2	0	0	0	0	0	0	0	0
denovo1062	Bacteria; __Proteobacteria; __Alphaproteobacteria; __Rhodobacterales; __Rhodobacteraceae; __Amylibacter; __Amylibacter ulvae	Bacteria	__Proteobacteria	__Alphaproteobacteria	__Rhodobacterales	__Rhodobacteraceae	__Amylibacter	__Amylibacter ulvae	1	1	NR_146351.1	NA	NA	0	0	0	0	0	0	3	0	0	0	0	0	0	0	0
denovo1063	; __; __; __; __; __; __		__	__	__	__	__	__	1	1	NA	NA	NA	0	0	0	0	0	0	0	0	0	0	0	0	0	0	3
denovo1064	Bacteria; __Bacteroidetes; __Flavobacteriia; __Flavobacteriales; __Flavobacteriaceae; __Chryseobacterium; __Chryseobacterium hispanicum	Bacteria	__Bacteroidetes	__Flavobacteriia	__Flavobacteriales	__Flavobacteriaceae	__Chryseobacterium	__Chryseobacterium hispanicum	1	1	NR_042464.1	NA	NA	0	0	0	0	0	0	0	0	0	0	0	0	0	0	3
denovo1065	Bacteria; __Bacteroidetes; __Flavobacteriia; __Flavobacteriales; __Flavobacteriaceae; __Algibacter; __Algibacter wandonensis	Bacteria	__Bacteroidetes	__Flavobacteriia	__Flavobacteriales	__Flavobacteriaceae	__Algibacter	__Algibacter wandonensis	1	1	NR_132290.1	NA	NA	0	0	0	0	3	0	0	0	0	0	0	0	0	0	0
denovo1066	Bacteria; __Proteobacteria; __Gammaproteobacteria; __Cellvibrionales; __Porticoccaceae; __Porticoccus; __Porticoccus hydrocarbonoclasticus	Bacteria	__Proteobacteria	__Gammaproteobacteria	__Cellvibrionales	__Porticoccaceae	__Porticoccus	__Porticoccus hydrocarbonoclasticus	1	1	NR_118247.1	NA	NA	0	0	0	0	0	0	0	0	0	3	0	0	0	0	0
denovo1067	Bacteria; __Proteobacteria; __Gammaproteobacteria; __Cellvibrionales; __Cellvibrionaceae; __Maricurvus; __Maricurvus nonylphenolicus	Bacteria	__Proteobacteria	__Gammaproteobacteria	__Cellvibrionales	__Cellvibrionaceae	__Maricurvus	__Maricurvus nonylphenolicus	1	1	NR_113358.1	NA	NA	3	0	0	0	0	0	0	0	0	0	0	0	0	0	0
denovo1068	Bacteria; __Proteobacteria; __Alphaproteobacteria; __Rhodobacterales; __Hyphomonadaceae; __Hellea; __Hellea balneolensis	Bacteria	__Proteobacteria	__Alphaproteobacteria	__Rhodobacterales	__Hyphomonadaceae	__Hellea	__Hellea balneolensis	1	1	NR_042992.1	NA	NA	0	0	0	0	0	0	0	0	0	3	0	0	0	0	0
denovo1069	Bacteria; __Firmicutes; __Bacilli; __Lactobacillales; __Lactobacillaceae; __Lactobacillus; __Lactobacillus animalis	Bacteria	__Firmicutes	__Bacilli	__Lactobacillales	__Lactobacillaceae	__Lactobacillus	__Lactobacillus animalis	1	1	NR_041610.1	NA	NA	0	0	0	0	0	0	0	0	0	0	0	0	0	0	6
denovo1070	; __; __; __; __; __; __		__	__	__	__	__	__	1	1	NA	NA	NA	0	0	0	0	0	0	0	0	3	0	0	0	0	0	0
denovo1071	Bacteria; __Bacteroidetes; __Flavobacteriia; __Flavobacteriales; __Flavobacteriaceae; __Algibacter; __Algibacter lectus	Bacteria	__Bacteroidetes	__Flavobacteriia	__Flavobacteriales	__Flavobacteriaceae	__Algibacter	__Algibacter lectus	1	1	NR_025696.1	NA	NA	0	0	0	1	0	0	0	0	0	0	0	2	0	0	0
denovo1072	Bacteria; __Bacteroidetes; __Saprospiria; __Saprospirales; __Lewinellaceae; __Lewinella; __Lewinella lacunae	Bacteria	__Bacteroidetes	__Saprospiria	__Saprospirales	__Lewinellaceae	__Lewinella	__Lewinella lacunae	1	1	NR_158054.1	NA	NA	3	0	0	0	0	0	0	0	0	0	0	0	0	0	0
denovo1073	; __; __; __; __; __; __		__	__	__	__	__	__	1	1	NA	NA	NA	0	0	3	0	0	0	0	0	0	0	0	0	0	0	0
denovo1074	Bacteria; __Proteobacteria; __Gammaproteobacteria; __Oceanospirillales; __Oceanospirillaceae; __Amphritea; __Amphritea atlantica	Bacteria	__Proteobacteria	__Gammaproteobacteria	__Oceanospirillales	__Oceanospirillaceae	__Amphritea	__Amphritea atlantica	1	1	NR_042455.1	NA	NA	0	0	0	0	0	0	0	0	0	3	0	0	0	0	0
denovo1075	Bacteria; __Bacteroidetes; __Flavobacteriia; __Flavobacteriales; __Flavobacteriaceae; __Polaribacter; __Polaribacter staleyi	Bacteria	__Bacteroidetes	__Flavobacteriia	__Flavobacteriales	__Flavobacteriaceae	__Polaribacter	__Polaribacter staleyi	1	1	NR_159336.1	NA	NA	3	0	0	0	0	0	0	0	0	0	0	0	0	0	0
denovo1076	Bacteria; __Proteobacteria; __Gammaproteobacteria; __Oceanospirillales; __Saccharospirillaceae; __Reinekea; __Reinekea marina	Bacteria	__Proteobacteria	__Gammaproteobacteria	__Oceanospirillales	__Saccharospirillaceae	__Reinekea	__Reinekea marina	1	1	NR_147763.1	NA	NA	0	0	0	0	0	3	0	0	0	0	0	0	0	0	0
denovo1077	Bacteria; __Proteobacteria; __Alphaproteobacteria; __Pelagibacterales; __Pelagibacteraceae; __Candidatus Pelagibacter; __Candidatus Pelagibacter ubique	Bacteria	__Proteobacteria	__Alphaproteobacteria	__Pelagibacterales	__Pelagibacteraceae	__Candidatus Pelagibacter	__Candidatus Pelagibacter ubique	1	1	NR_074224.1	NA	NA	0	0	0	0	0	0	0	0	0	0	0	0	0	3	0
denovo1078	; __; __; __; __; __; __		__	__	__	__	__	__	1	1	NA	NA	NA	0	0	0	0	0	0	0	0	0	3	0	0	0	0	0
denovo1079	Bacteria; __Firmicutes; __Bacilli; __Bacillales; __Staphylococcaceae; __Macrococcus; __Macrococcus lamae	Bacteria	__Firmicutes	__Bacilli	__Bacillales	__Staphylococcaceae	__Macrococcus	__Macrococcus lamae	1	1	NR_029057.1	NA	NA	3	0	0	0	0	0	0	0	0	0	0	0	0	0	0
denovo1080	Bacteria; __Cyanobacteria; __; __Nostocales; __Calotrichaceae; __Dulcicalothrix; __Dulcicalothrix necridiiformans	Bacteria	__Cyanobacteria	__	__Nostocales	__Calotrichaceae	__Dulcicalothrix	__Dulcicalothrix necridiiformans	1	1	NR_164867.1	NA	NA	0	0	0	0	0	0	0	0	0	0	2	0	1	0	0
denovo1081	Bacteria; __Cyanobacteria; __; __Pleurocapsales; __Xenococcaceae; __Foliisarcina; __Foliisarcina bertiogensis	Bacteria	__Cyanobacteria	__	__Pleurocapsales	__Xenococcaceae	__Foliisarcina	__Foliisarcina bertiogensis	1	1	NR_148664.1	NA	NA	0	0	0	1	0	0	0	0	0	0	2	0	0	0	0
denovo1082	; __; __; __; __; __; __		__	__	__	__	__	__	1	1	NA	NA	NA	0	0	0	0	0	0	0	0	0	0	0	0	3	0	0
denovo1083	Bacteria; __Bacteroidetes; __Flavobacteriia; __Flavobacteriales; __Cryomorphaceae; __Owenweeksia; __Owenweeksia hongkongensis	Bacteria	__Bacteroidetes	__Flavobacteriia	__Flavobacteriales	__Cryomorphaceae	__Owenweeksia	__Owenweeksia hongkongensis	1	1	NR_074100.1	NA	NA	0	0	0	0	0	0	0	0	0	0	0	0	3	0	0
denovo1084	Bacteria; __Proteobacteria; __Betaproteobacteria; __Burkholderiales; __Burkholderiaceae; __Paraburkholderia; __Paraburkholderia mimosarum	Bacteria	__Proteobacteria	__Betaproteobacteria	__Burkholderiales	__Burkholderiaceae	__Paraburkholderia	__Paraburkholderia mimosarum	1	1	NR_118067.1	NA	NA	0	0	0	0	0	0	0	0	0	0	0	0	0	0	3
denovo1085	Bacteria; __Cyanobacteria; __; __Synechococcales; __Synechococcaceae; __Synechococcus; __Synechococcus rubescens	Bacteria	__Cyanobacteria	__	__Synechococcales	__Synechococcaceae	__Synechococcus	__Synechococcus rubescens	1	1	NR_125481.1	NA	NA	0	0	0	0	0	0	0	0	0	0	0	0	0	0	3
denovo1086	; __; __; __; __; __; __		__	__	__	__	__	__	1	1	NA	NA	NA	0	0	0	0	0	0	0	0	0	1	0	0	2	0	0
denovo1087	Bacteria; __Actinobacteria; __Actinobacteria; __Micrococcales; __Intrasporangiaceae; __Tetrasphaera; __Tetrasphaera jenkinsii	Bacteria	__Actinobacteria	__Actinobacteria	__Micrococcales	__Intrasporangiaceae	__Tetrasphaera	__Tetrasphaera jenkinsii	1	1	NR_043461.1	NA	NA	0	0	0	0	0	0	0	0	0	0	0	0	0	0	3
denovo1088	; __; __; __; __; __; __		__	__	__	__	__	__	1	1	NA	NA	NA	0	0	0	0	0	0	0	0	3	0	0	0	0	0	0
denovo1089	Bacteria; __Proteobacteria; __Alphaproteobacteria; __Pelagibacterales; __Pelagibacteraceae; __Candidatus Pelagibacter; __Candidatus Pelagibacter ubique	Bacteria	__Proteobacteria	__Alphaproteobacteria	__Pelagibacterales	__Pelagibacteraceae	__Candidatus Pelagibacter	__Candidatus Pelagibacter ubique	1	1	NR_074224.1	NA	NA	0	0	3	0	0	0	0	0	0	0	0	0	0	0	0
denovo1090	Bacteria; __Bacteroidetes; __Flavobacteriia; __Flavobacteriales; __Flavobacteriaceae; __Formosa; __Formosa undariae	Bacteria	__Bacteroidetes	__Flavobacteriia	__Flavobacteriales	__Flavobacteriaceae	__Formosa	__Formosa undariae	1	1	NR_109753.1	NA	NA	0	0	0	0	0	0	3	0	0	0	0	0	0	0	0
denovo1091	Bacteria; __Proteobacteria; __Gammaproteobacteria; __Pasteurellales; __Pasteurellaceae; __Haemophilus; __Haemophilus influenzae	Bacteria	__Proteobacteria	__Gammaproteobacteria	__Pasteurellales	__Pasteurellaceae	__Haemophilus	__Haemophilus influenzae	1	1	NR_044682.2	NA	NA	0	0	0	0	0	0	0	0	0	0	0	0	0	0	3
denovo1092	; __; __; __; __; __; __		__	__	__	__	__	__	1	1	NA	NA	NA	0	0	0	0	0	3	0	0	0	0	0	0	0	0	0
denovo1093	Bacteria; __Proteobacteria; __Alphaproteobacteria; __Caulobacterales; __Caulobacteraceae; __Brevundimonas; __Brevundimonas albigilva	Bacteria	__Proteobacteria	__Alphaproteobacteria	__Caulobacterales	__Caulobacteraceae	__Brevundimonas	__Brevundimonas albigilva	1	1	NR_148791.1	NA	NA	0	0	0	0	0	0	0	0	0	0	0	0	0	0	3
denovo1094	Bacteria; __Proteobacteria; __Betaproteobacteria; __Nitrosomonadales; __Gallionellaceae; __Gallionella; __Gallionella capsiferriformans	Bacteria	__Proteobacteria	__Betaproteobacteria	__Nitrosomonadales	__Gallionellaceae	__Gallionella	__Gallionella capsiferriformans	1	1	NR_074658.1	NA	NA	0	0	0	0	0	0	0	0	0	0	0	0	0	0	3
denovo1095	Bacteria; __Proteobacteria; __Alphaproteobacteria; __Holosporales; __Caedimonadaceae; __Caedimonas; __Caedimonas varicaedens	Bacteria	__Proteobacteria	__Alphaproteobacteria	__Holosporales	__Caedimonadaceae	__Caedimonas	__Caedimonas varicaedens	1	1	NG_041959.1	NA	NA	0	0	0	0	0	0	0	0	0	0	0	0	0	3	0
denovo1096	; __; __; __; __; __; __		__	__	__	__	__	__	1	1	NA	NA	NA	0	0	0	0	0	0	0	3	0	0	0	0	0	0	0
denovo1097	; __; __; __; __; __; __		__	__	__	__	__	__	1	1	NA	NA	NA	0	2	0	0	0	0	0	0	4	0	0	0	0	0	0
denovo1098	Bacteria; __Proteobacteria; __Alphaproteobacteria; __Pelagibacterales; __Pelagibacteraceae; __Candidatus Pelagibacter; __Candidatus Pelagibacter ubique	Bacteria	__Proteobacteria	__Alphaproteobacteria	__Pelagibacterales	__Pelagibacteraceae	__Candidatus Pelagibacter	__Candidatus Pelagibacter ubique	1	1	NR_074224.1	NA	NA	0	0	0	0	0	0	0	0	0	3	0	0	0	0	0
denovo1099	; __; __; __; __; __; __		__	__	__	__	__	__	1	1	NA	NA	NA	0	0	0	0	0	0	0	0	0	0	0	0	0	3	0
denovo1100	Bacteria; __Chloroflexi; __Dehalococcoidia; __; __; __Dehalogenimonas; __Dehalogenimonas formicexedens	Bacteria	__Chloroflexi	__Dehalococcoidia	__	__	__Dehalogenimonas	__Dehalogenimonas formicexedens	1	1	NR_156917.1	NA	NA	0	3	2	0	0	1	0	0	0	0	0	0	0	0	0
denovo1101	Bacteria; __Proteobacteria; __Deltaproteobacteria; __Desulfuromonadales; __Geobacteraceae; __Geobacter; __Geobacter pelophilus	Bacteria	__Proteobacteria	__Deltaproteobacteria	__Desulfuromonadales	__Geobacteraceae	__Geobacter	__Geobacter pelophilus	1	1	NR_026077.1	NA	NA	0	0	0	0	0	0	0	0	0	0	0	0	0	3	0
denovo1102	Bacteria; __Proteobacteria; __Betaproteobacteria; __Nitrosomonadales; __Methylophilaceae; __Methylobacillus; __Methylobacillus rhizosphaerae	Bacteria	__Proteobacteria	__Betaproteobacteria	__Nitrosomonadales	__Methylophilaceae	__Methylobacillus	__Methylobacillus rhizosphaerae	1	1	NR_132610.1	NA	NA	0	0	0	0	0	0	0	0	0	3	0	0	0	0	0
denovo1103	Bacteria; __Proteobacteria; __Gammaproteobacteria; __; __; __Sedimenticola; __Sedimenticola thiotaurini	Bacteria	__Proteobacteria	__Gammaproteobacteria	__	__	__Sedimenticola	__Sedimenticola thiotaurini	1	1	NR_136790.1	NA	NA	0	0	2	0	1	0	0	0	0	0	0	0	0	0	0
denovo1104	Bacteria; __Proteobacteria; __Betaproteobacteria; __Burkholderiales; __Burkholderiaceae; __Paraburkholderia; __Paraburkholderia kururiensis	Bacteria	__Proteobacteria	__Betaproteobacteria	__Burkholderiales	__Burkholderiaceae	__Paraburkholderia	__Paraburkholderia kururiensis	1	1	NR_118066.1	NA	NA	0	0	0	0	0	0	0	0	0	0	0	0	0	0	3
denovo1105	Bacteria; __Bacteroidetes; __Flavobacteriia; __Flavobacteriales; __Flavobacteriaceae; __Moheibacter; __Moheibacter stercoris	Bacteria	__Bacteroidetes	__Flavobacteriia	__Flavobacteriales	__Flavobacteriaceae	__Moheibacter	__Moheibacter stercoris	1	1	NR_149791.1	NA	NA	0	0	0	0	0	0	0	0	0	0	0	0	0	0	3
denovo1106	Bacteria; __Proteobacteria; __Gammaproteobacteria; __Alteromonadales; __Alteromonadaceae; __Paraglaciecola; __Paraglaciecola hydrolytica	Bacteria	__Proteobacteria	__Gammaproteobacteria	__Alteromonadales	__Alteromonadaceae	__Paraglaciecola	__Paraglaciecola hydrolytica	1	1	NR_157658.1	NA	NA	0	0	0	3	0	0	0	0	0	0	0	0	0	0	0
denovo1107	Bacteria; __Proteobacteria; __Gammaproteobacteria; __Pseudomonadales; __Moraxellaceae; __Acinetobacter; __Acinetobacter lactucae	Bacteria	__Proteobacteria	__Gammaproteobacteria	__Pseudomonadales	__Moraxellaceae	__Acinetobacter	__Acinetobacter lactucae	1	1	NR_152004.1	NA	NA	0	0	0	0	0	0	0	0	0	0	0	0	0	0	3
denovo1108	Bacteria; __Proteobacteria; __Gammaproteobacteria; __Cellvibrionales; __Cellvibrionaceae; __Maricurvus; __Maricurvus nonylphenolicus	Bacteria	__Proteobacteria	__Gammaproteobacteria	__Cellvibrionales	__Cellvibrionaceae	__Maricurvus	__Maricurvus nonylphenolicus	1	1	NR_113358.1	NA	NA	0	0	0	0	3	0	0	0	0	0	0	0	0	0	0
denovo1109	Bacteria; __Proteobacteria; __Alphaproteobacteria; __Rhodobacterales; __Rhodobacteraceae; __Roseobacter; __Roseobacter ponti	Bacteria	__Proteobacteria	__Alphaproteobacteria	__Rhodobacterales	__Rhodobacteraceae	__Roseobacter	__Roseobacter ponti	1	1	NR_157654.1	NA	NA	0	0	0	3	0	0	0	0	0	0	0	0	0	0	0
denovo1110	Bacteria; __Bacteroidetes; __Bacteroidia; __Bacteroidales; __Bacteroidaceae; __Bacteroides; __Bacteroides ovatus	Bacteria	__Bacteroidetes	__Bacteroidia	__Bacteroidales	__Bacteroidaceae	__Bacteroides	__Bacteroides ovatus	1	1	NR_112940.1	NA	NA	0	0	0	0	0	0	0	0	0	0	0	0	0	0	3
denovo1111	Bacteria; __Cyanobacteria; __; __Pleurocapsales; __Xenococcaceae; __Foliisarcina; __Foliisarcina bertiogensis	Bacteria	__Cyanobacteria	__	__Pleurocapsales	__Xenococcaceae	__Foliisarcina	__Foliisarcina bertiogensis	1	1	NR_148664.1	NA	NA	0	0	0	0	0	0	0	0	0	3	0	0	0	0	0
denovo1112	Bacteria; __Proteobacteria; __Gammaproteobacteria; __Oceanospirillales; __Oceanospirillaceae; __Marinomonas; __Marinomonas fungiae	Bacteria	__Proteobacteria	__Gammaproteobacteria	__Oceanospirillales	__Oceanospirillaceae	__Marinomonas	__Marinomonas fungiae	1	1	NR_133775.1	NA	NA	0	0	0	3	0	0	0	0	0	0	0	0	0	0	0
denovo1113	Bacteria; __Proteobacteria; __Gammaproteobacteria; __Oceanospirillales; __Saccharospirillaceae; __Reinekea; __Reinekea aestuarii	Bacteria	__Proteobacteria	__Gammaproteobacteria	__Oceanospirillales	__Saccharospirillaceae	__Reinekea	__Reinekea aestuarii	1	1	NR_114294.1	NA	NA	3	0	0	0	0	0	0	0	0	0	0	0	0	0	0
denovo1114	; __; __; __; __; __; __		__	__	__	__	__	__	1	1	NA	NA	NA	0	0	0	0	0	0	3	0	0	0	0	0	0	0	0
denovo1115	Bacteria; __Proteobacteria; __Alphaproteobacteria; __Rhodobacterales; __Rhodobacteraceae; __Acidimangrovimonas; __Acidimangrovimonas sediminis	Bacteria	__Proteobacteria	__Alphaproteobacteria	__Rhodobacterales	__Rhodobacteraceae	__Acidimangrovimonas	__Acidimangrovimonas sediminis	1	1	NR_164999.1	NA	NA	0	0	0	0	0	0	3	0	0	0	0	0	0	0	0
denovo1116	Bacteria; __Cyanobacteria; __; __Pleurocapsales; __Dermocarpellaceae; __Stanieria; __Stanieria cyanosphaera	Bacteria	__Cyanobacteria	__	__Pleurocapsales	__Dermocarpellaceae	__Stanieria	__Stanieria cyanosphaera	1	1	NR_102468.1	NA	NA	0	0	3	0	0	0	0	0	0	0	0	0	0	0	0
denovo1117	Bacteria; __Proteobacteria; __Gammaproteobacteria; __Xanthomonadales; __Xanthomonadaceae; __Stenotrophomonas; __Stenotrophomonas maltophilia	Bacteria	__Proteobacteria	__Gammaproteobacteria	__Xanthomonadales	__Xanthomonadaceae	__Stenotrophomonas	__Stenotrophomonas maltophilia	1	1	NR_041577.1	NA	NA	0	0	0	0	0	0	0	0	0	0	0	0	0	0	3
denovo1118	Bacteria; __Proteobacteria; __Alphaproteobacteria; __Pelagibacterales; __Pelagibacteraceae; __Candidatus Pelagibacter; __Candidatus Pelagibacter ubique	Bacteria	__Proteobacteria	__Alphaproteobacteria	__Pelagibacterales	__Pelagibacteraceae	__Candidatus Pelagibacter	__Candidatus Pelagibacter ubique	1	1	NR_074224.1	NA	NA	0	0	0	0	0	0	0	0	0	3	0	0	0	0	0
denovo1119	Bacteria; __Proteobacteria; __Alphaproteobacteria; __Pelagibacterales; __Pelagibacteraceae; __Candidatus Pelagibacter; __Candidatus Pelagibacter ubique	Bacteria	__Proteobacteria	__Alphaproteobacteria	__Pelagibacterales	__Pelagibacteraceae	__Candidatus Pelagibacter	__Candidatus Pelagibacter ubique	1	1	NR_074224.1	NA	NA	0	0	0	0	0	0	3	0	0	0	0	0	0	0	0
denovo1120	; __; __; __; __; __; __		__	__	__	__	__	__	1	1	NA	NA	NA	0	0	0	0	0	0	0	0	0	0	0	0	3	0	0
denovo1121	Bacteria; __Proteobacteria; __Alphaproteobacteria; __Rhodobacterales; __Rhodobacteraceae; __Amylibacter; __Amylibacter cionae	Bacteria	__Proteobacteria	__Alphaproteobacteria	__Rhodobacterales	__Rhodobacteraceae	__Amylibacter	__Amylibacter cionae	1	1	NR_158032.1	NA	NA	0	0	0	0	0	3	0	0	0	0	0	0	0	0	0
denovo1122	Bacteria; __Bacteroidetes; __Saprospiria; __Saprospirales; __Saprospiraceae; __Aureispira; __Aureispira maritima	Bacteria	__Bacteroidetes	__Saprospiria	__Saprospirales	__Saprospiraceae	__Aureispira	__Aureispira maritima	1	1	NR_041537.1	NA	NA	0	0	0	0	0	0	0	0	3	0	0	0	0	0	0
denovo1123	Bacteria; __Bacteroidetes; __Flavobacteriia; __Flavobacteriales; __Cryomorphaceae; __Vicingus; __Vicingus serpentipes	Bacteria	__Bacteroidetes	__Flavobacteriia	__Flavobacteriales	__Cryomorphaceae	__Vicingus	__Vicingus serpentipes	1	1	NR_159281.1	NA	NA	0	0	0	0	0	3	0	0	0	0	0	0	0	0	0
denovo1124	; __; __; __; __; __; __		__	__	__	__	__	__	1	1	NA	NA	NA	0	1	2	0	0	0	0	0	0	0	0	0	0	0	0
denovo1125	Bacteria; __Bacteroidetes; __Flavobacteriia; __Flavobacteriales; __Flavobacteriaceae; __Aestuariimonas; __Aestuariimonas insulae	Bacteria	__Bacteroidetes	__Flavobacteriia	__Flavobacteriales	__Flavobacteriaceae	__Aestuariimonas	__Aestuariimonas insulae	1	1	NR_163632.1	NA	NA	0	0	0	0	0	0	0	0	0	0	0	0	3	0	0
denovo1126	Bacteria; __Proteobacteria; __Betaproteobacteria; __Nitrosomonadales; __Methylophilaceae; __Methylophilus; __Methylophilus methylotrophus	Bacteria	__Proteobacteria	__Betaproteobacteria	__Nitrosomonadales	__Methylophilaceae	__Methylophilus	__Methylophilus methylotrophus	1	1	NR_041257.1	NA	NA	0	0	3	0	0	0	0	0	0	0	0	0	0	0	0
denovo1127	; __; __; __; __; __; __		__	__	__	__	__	__	1	1	NA	NA	NA	0	0	0	0	0	0	0	0	0	0	0	0	0	3	0
denovo1128	Bacteria; __Bacteroidetes; __Flavobacteriia; __Flavobacteriales; __Flavobacteriaceae; __Formosa; __Formosa arctica	Bacteria	__Bacteroidetes	__Flavobacteriia	__Flavobacteriales	__Flavobacteriaceae	__Formosa	__Formosa arctica	1	1	NR_125695.1	NA	NA	0	0	0	0	0	0	0	0	0	0	0	3	0	0	0
denovo1129	; __; __; __; __; __; __		__	__	__	__	__	__	1	1	NA	NA	NA	0	0	0	0	0	0	0	0	0	0	0	3	0	0	0
denovo1130	Bacteria; __Actinobacteria; __Actinobacteria; __Micrococcales; __Microbacteriaceae; __Glaciibacter; __Glaciibacter superstes	Bacteria	__Actinobacteria	__Actinobacteria	__Micrococcales	__Microbacteriaceae	__Glaciibacter	__Glaciibacter superstes	1	1	NR_041679.1	NA	NA	0	0	0	3	0	0	0	0	0	0	0	0	0	0	0
denovo1131	Bacteria; __Proteobacteria; __Gammaproteobacteria; __Oceanospirillales; __Oleiphilaceae; __Oleiphilus; __Oleiphilus messinensis	Bacteria	__Proteobacteria	__Gammaproteobacteria	__Oceanospirillales	__Oleiphilaceae	__Oleiphilus	__Oleiphilus messinensis	1	1	NR_025432.1	NA	NA	0	3	0	0	0	0	0	0	0	0	0	0	0	0	0
denovo1132	Bacteria; __Bacteroidetes; __Flavobacteriia; __Flavobacteriales; __Flavobacteriaceae; __Gillisia; __Gillisia myxillae	Bacteria	__Bacteroidetes	__Flavobacteriia	__Flavobacteriales	__Flavobacteriaceae	__Gillisia	__Gillisia myxillae	1	1	NR_043635.1	NA	NA	0	0	3	0	0	0	0	0	0	0	0	0	0	0	0
denovo1133	Bacteria; __Proteobacteria; __Gammaproteobacteria; __Pseudomonadales; __Pseudomonadaceae; __Pseudomonas; __Pseudomonas veronii	Bacteria	__Proteobacteria	__Gammaproteobacteria	__Pseudomonadales	__Pseudomonadaceae	__Pseudomonas	__Pseudomonas veronii	1	1	NR_028706.1	NA	NA	0	0	0	0	3	0	0	0	0	0	0	0	0	0	0
denovo1134	Bacteria; __Deinococcus-Thermus; __Deinococci; __Deinococcales; __Deinococcaceae; __Deinococcus; __Deinococcus aerius	Bacteria	__Deinococcus-Thermus	__Deinococci	__Deinococcales	__Deinococcaceae	__Deinococcus	__Deinococcus aerius	1	1	NR_040934.1	NA	NA	0	0	0	0	0	0	0	0	0	0	0	0	0	0	3
denovo1135	Bacteria; __Bacteroidetes; __Flavobacteriia; __Flavobacteriales; __Flavobacteriaceae; __Olleya; __Olleya namhaensis	Bacteria	__Bacteroidetes	__Flavobacteriia	__Flavobacteriales	__Flavobacteriaceae	__Olleya	__Olleya namhaensis	1	1	NR_109551.1	NA	NA	0	1	0	0	0	1	0	0	1	0	0	0	0	0	0
denovo1136	Bacteria; __Bacteroidetes; __Flavobacteriia; __Flavobacteriales; __Flavobacteriaceae; __Tenacibaculum; __Tenacibaculum insulae	Bacteria	__Bacteroidetes	__Flavobacteriia	__Flavobacteriales	__Flavobacteriaceae	__Tenacibaculum	__Tenacibaculum insulae	1	1	NR_159277.1	NA	NA	0	0	3	0	0	0	0	0	0	0	0	0	0	0	0
denovo1137	; __; __; __; __; __; __		__	__	__	__	__	__	1	1	NA	NA	NA	0	0	0	0	0	0	0	0	0	0	3	0	0	0	0
denovo1138	Bacteria; __Proteobacteria; __Gammaproteobacteria; __Pseudomonadales; __Moraxellaceae; __Psychrobacter; __Psychrobacter maritimus	Bacteria	__Proteobacteria	__Gammaproteobacteria	__Pseudomonadales	__Moraxellaceae	__Psychrobacter	__Psychrobacter maritimus	1	1	NR_027225.1	NA	NA	0	0	0	0	0	3	0	0	0	0	0	0	0	0	0
denovo1139	; __; __; __; __; __; __		__	__	__	__	__	__	1	1	NA	NA	NA	0	0	3	0	0	0	0	0	0	0	0	0	0	0	0
denovo1140	Bacteria; __Bacteroidetes; __Flavobacteriia; __Flavobacteriales; __Flavobacteriaceae; __Polaribacter; __Polaribacter irgensii	Bacteria	__Bacteroidetes	__Flavobacteriia	__Flavobacteriales	__Flavobacteriaceae	__Polaribacter	__Polaribacter irgensii	1	1	NR_044733.2	NA	NA	0	0	0	0	0	0	0	0	3	0	0	0	0	0	0
denovo1141	Bacteria; __Bacteroidetes; __Flavobacteriia; __Flavobacteriales; __Cryomorphaceae; __Vicingus; __Vicingus serpentipes	Bacteria	__Bacteroidetes	__Flavobacteriia	__Flavobacteriales	__Cryomorphaceae	__Vicingus	__Vicingus serpentipes	1	1	NR_159281.1	NA	NA	0	0	0	0	0	0	0	0	0	0	0	0	3	0	0
denovo1142	Bacteria; __Nitrospinae; __Nitrospinia; __Nitrospinales; __Nitrospinaceae; __Nitrospina; __Nitrospina gracilis	Bacteria	__Nitrospinae	__Nitrospinia	__Nitrospinales	__Nitrospinaceae	__Nitrospina	__Nitrospina gracilis	1	1	NR_104821.1	NA	NA	0	0	0	0	0	0	0	0	0	0	0	0	0	3	0
denovo1143	Bacteria; __Proteobacteria; __Gammaproteobacteria; __; __; __Sedimenticola; __Sedimenticola thiotaurini	Bacteria	__Proteobacteria	__Gammaproteobacteria	__	__	__Sedimenticola	__Sedimenticola thiotaurini	1	1	NR_136790.1	NA	NA	0	0	0	0	0	0	0	0	0	0	2	3	1	0	0
denovo1144	Bacteria; __Bacteroidetes; __Flavobacteriia; __Flavobacteriales; __Flavobacteriaceae; __Lacinutrix; __Lacinutrix jangbogonensis	Bacteria	__Bacteroidetes	__Flavobacteriia	__Flavobacteriales	__Flavobacteriaceae	__Lacinutrix	__Lacinutrix jangbogonensis	1	1	NR_134754.1	NA	NA	0	0	0	0	0	0	0	3	0	0	0	0	0	0	0
denovo1145	Bacteria; __Proteobacteria; __Gammaproteobacteria; __Oceanospirillales; __Balneatrichaceae; __Balneatrix; __Balneatrix alpica	Bacteria	__Proteobacteria	__Gammaproteobacteria	__Oceanospirillales	__Balneatrichaceae	__Balneatrix	__Balneatrix alpica	1	1	NR_026465.1	NA	NA	0	0	3	0	0	0	0	0	0	0	0	0	0	0	0
denovo1146	Bacteria; __Bacteroidetes; __Flavobacteriia; __Flavobacteriales; __Flavobacteriaceae; __Pseudofulvibacter; __Pseudofulvibacter gastropodicola	Bacteria	__Bacteroidetes	__Flavobacteriia	__Flavobacteriales	__Flavobacteriaceae	__Pseudofulvibacter	__Pseudofulvibacter gastropodicola	1	1	NR_147772.1	NA	NA	0	0	0	0	0	0	0	0	0	0	3	0	0	0	0
denovo1147	Bacteria; __Proteobacteria; __Alphaproteobacteria; __Pelagibacterales; __Pelagibacteraceae; __Candidatus Pelagibacter; __Candidatus Pelagibacter ubique	Bacteria	__Proteobacteria	__Alphaproteobacteria	__Pelagibacterales	__Pelagibacteraceae	__Candidatus Pelagibacter	__Candidatus Pelagibacter ubique	1	1	NR_074224.1	NA	NA	0	0	0	0	0	0	0	0	0	0	3	0	0	0	0
denovo1148	; __; __; __; __; __; __		__	__	__	__	__	__	1	1	NA	NA	NA	0	0	3	0	0	0	0	0	0	0	0	0	0	0	0
denovo1149	Bacteria; __Proteobacteria; __Alphaproteobacteria; __Rhodobacterales; __Rhodobacteraceae; __Planktomarina; __Planktomarina temperata	Bacteria	__Proteobacteria	__Alphaproteobacteria	__Rhodobacterales	__Rhodobacteraceae	__Planktomarina	__Planktomarina temperata	1	1	NR_125550.1	NA	NA	0	0	0	0	0	0	0	0	0	0	0	3	0	0	0
denovo1150	Bacteria; __Proteobacteria; __Gammaproteobacteria; __Cellvibrionales; __Cellvibrionaceae; __Simiduia; __Simiduia agarivorans	Bacteria	__Proteobacteria	__Gammaproteobacteria	__Cellvibrionales	__Cellvibrionaceae	__Simiduia	__Simiduia agarivorans	1	1	NR_074853.1	NA	NA	3	0	0	0	0	0	0	0	0	0	0	0	0	0	0
denovo1151	Bacteria; __Proteobacteria; __Gammaproteobacteria; __; __; __Pseudohongiella; __Pseudohongiella acticola	Bacteria	__Proteobacteria	__Gammaproteobacteria	__	__	__Pseudohongiella	__Pseudohongiella acticola	1	1	NR_136444.1	NA	NA	0	0	0	0	0	0	0	0	0	0	0	0	0	3	0
denovo1152	Bacteria; __Bacteroidetes; __Flavobacteriia; __Flavobacteriales; __Flavobacteriaceae; __Polaribacter; __Polaribacter staleyi	Bacteria	__Bacteroidetes	__Flavobacteriia	__Flavobacteriales	__Flavobacteriaceae	__Polaribacter	__Polaribacter staleyi	1	1	NR_159336.1	NA	NA	3	0	0	0	0	0	0	0	0	0	0	0	0	0	0
denovo1153	Bacteria; __Proteobacteria; __Deltaproteobacteria; __Desulfovibrionales; __Desulfonatronaceae; __Desulfonatronum; __Desulfonatronum cooperativum	Bacteria	__Proteobacteria	__Deltaproteobacteria	__Desulfovibrionales	__Desulfonatronaceae	__Desulfonatronum	__Desulfonatronum cooperativum	1	1	NR_043143.1	NA	NA	0	1	2	0	1	0	0	0	0	0	0	0	0	5	0
denovo1154	Bacteria; __Bacteroidetes; __Flavobacteriia; __Flavobacteriales; __Flavobacteriaceae; __Tenacibaculum; __Tenacibaculum aestuariivivum	Bacteria	__Bacteroidetes	__Flavobacteriia	__Flavobacteriales	__Flavobacteriaceae	__Tenacibaculum	__Tenacibaculum aestuariivivum	1	1	NR_159126.1	NA	NA	0	0	0	0	0	0	0	0	0	0	0	3	0	0	0
denovo1155	Bacteria; __Proteobacteria; __Gammaproteobacteria; __Thiotrichales; __Thiotrichaceae; __Leucothrix; __Leucothrix pacifica	Bacteria	__Proteobacteria	__Gammaproteobacteria	__Thiotrichales	__Thiotrichaceae	__Leucothrix	__Leucothrix pacifica	1	1	NR_136768.1	NA	NA	0	0	0	0	0	2	0	0	1	0	0	0	0	0	0
denovo1156	Bacteria; __Actinobacteria; __Actinobacteria; __Propionibacteriales; __Nocardioidaceae; __Nocardioides; __Nocardioides aquaticus	Bacteria	__Actinobacteria	__Actinobacteria	__Propionibacteriales	__Nocardioidaceae	__Nocardioides	__Nocardioides aquaticus	1	1	NR_044903.1	NA	NA	3	0	0	0	0	0	0	0	0	0	0	0	0	0	0
denovo1157	Bacteria; __Proteobacteria; __Gammaproteobacteria; __Cellvibrionales; __Microbulbiferaceae; __Microbulbifer; __Microbulbifer maritimus	Bacteria	__Proteobacteria	__Gammaproteobacteria	__Cellvibrionales	__Microbulbiferaceae	__Microbulbifer	__Microbulbifer maritimus	1	1	NR_025772.1	NA	NA	0	0	0	0	3	0	0	0	0	0	0	0	0	0	0
denovo1158	Bacteria; __Proteobacteria; __Betaproteobacteria; __Neisseriales; __Neisseriaceae; __Vitreoscilla; __Vitreoscilla stercoraria	Bacteria	__Proteobacteria	__Betaproteobacteria	__Neisseriales	__Neisseriaceae	__Vitreoscilla	__Vitreoscilla stercoraria	1	1	NR_025894.1	NA	NA	0	0	0	0	0	0	0	0	0	0	0	0	0	0	3
denovo1159	Bacteria; __Verrucomicrobia; __Opitutae; __Puniceicoccales; __Puniceicoccaceae; __Coraliomargarita; __Coraliomargarita akajimensis	Bacteria	__Verrucomicrobia	__Opitutae	__Puniceicoccales	__Puniceicoccaceae	__Coraliomargarita	__Coraliomargarita akajimensis	1	1	NR_074901.1	NA	NA	0	0	0	0	0	0	0	0	0	0	0	0	0	3	0
denovo1160	Bacteria; __Proteobacteria; __Gammaproteobacteria; __Oceanospirillales; __Saccharospirillaceae; __Reinekea; __Reinekea marinisedimentorum	Bacteria	__Proteobacteria	__Gammaproteobacteria	__Oceanospirillales	__Saccharospirillaceae	__Reinekea	__Reinekea marinisedimentorum	1	1	NR_029013.1	NA	NA	0	0	0	0	0	0	0	0	0	0	0	3	0	0	0
denovo1161	Bacteria; __Bacteroidetes; __Flavobacteriia; __Flavobacteriales; __Flavobacteriaceae; __Mesoflavibacter; __Mesoflavibacter aestuarii	Bacteria	__Bacteroidetes	__Flavobacteriia	__Flavobacteriales	__Flavobacteriaceae	__Mesoflavibacter	__Mesoflavibacter aestuarii	1	1	NR_133778.1	NA	NA	0	0	0	0	0	0	0	0	0	1	0	2	0	0	0
denovo1162	; __; __; __; __; __; __		__	__	__	__	__	__	1	1	NA	NA	NA	0	0	0	0	0	0	0	0	0	0	0	0	3	0	0
denovo1163	Bacteria; __Cyanobacteria; __; __Oscillatoriales; __; __Ancylothrix; __Ancylothrix rivularis	Bacteria	__Cyanobacteria	__	__Oscillatoriales	__	__Ancylothrix	__Ancylothrix rivularis	1	1	NR_149291.1	NA	NA	0	0	0	0	0	0	0	3	0	0	0	0	0	0	0
denovo1164	Bacteria; __Proteobacteria; __Deltaproteobacteria; __Desulfobacterales; __Desulfobulbaceae; __; __[Desulfobacterium] catecholicum	Bacteria	__Proteobacteria	__Deltaproteobacteria	__Desulfobacterales	__Desulfobulbaceae	__	__[Desulfobacterium] catecholicum	1	1	NR_028895.1	NA	NA	0	0	0	0	0	0	0	0	0	0	0	0	0	0	3
denovo1165	Bacteria; __Verrucomicrobia; __Verrucomicrobiae; __Verrucomicrobiales; __Rubritaleaceae; __Rubritalea; __Rubritalea halochordaticola	Bacteria	__Verrucomicrobia	__Verrucomicrobiae	__Verrucomicrobiales	__Rubritaleaceae	__Rubritalea	__Rubritalea halochordaticola	1	1	NR_113049.1	NA	NA	0	0	0	0	0	0	0	0	3	0	0	0	0	0	0
denovo1166	Bacteria; __Proteobacteria; __Alphaproteobacteria; __Rhizobiales; __Methylobacteriaceae; __Methylobacterium; __Methylobacterium soli	Bacteria	__Proteobacteria	__Alphaproteobacteria	__Rhizobiales	__Methylobacteriaceae	__Methylobacterium	__Methylobacterium soli	1	1	NR_116473.1	NA	NA	0	0	0	0	0	0	0	0	0	0	0	0	0	0	3
denovo1167	Bacteria; __Bacteroidetes; __Chitinophagia; __Chitinophagales; __Chitinophagaceae; __Hydrotalea; __Hydrotalea flava	Bacteria	__Bacteroidetes	__Chitinophagia	__Chitinophagales	__Chitinophagaceae	__Hydrotalea	__Hydrotalea flava	1	1	NR_117026.1	NA	NA	0	0	0	0	0	3	0	0	0	0	0	0	0	0	0
denovo1168	Bacteria; __Bacteroidetes; __Saprospiria; __Saprospirales; __Lewinellaceae; __Lewinella; __Lewinella aquimaris	Bacteria	__Bacteroidetes	__Saprospiria	__Saprospirales	__Lewinellaceae	__Lewinella	__Lewinella aquimaris	1	1	NR_152037.1	NA	NA	0	0	0	2	0	0	1	0	0	0	0	0	0	0	0
denovo1169	Bacteria; __Verrucomicrobia; __Verrucomicrobiae; __Verrucomicrobiales; __Verrucomicrobiaceae; __Verrucomicrobium; __Verrucomicrobium spinosum	Bacteria	__Verrucomicrobia	__Verrucomicrobiae	__Verrucomicrobiales	__Verrucomicrobiaceae	__Verrucomicrobium	__Verrucomicrobium spinosum	1	1	NR_026266.1	NA	NA	0	0	0	0	0	0	0	0	0	0	0	0	0	0	3
denovo1170	Bacteria; __Proteobacteria; __Betaproteobacteria; __Burkholderiales; __Comamonadaceae; __Limnohabitans; __Limnohabitans curvus	Bacteria	__Proteobacteria	__Betaproteobacteria	__Burkholderiales	__Comamonadaceae	__Limnohabitans	__Limnohabitans curvus	1	1	NR_125491.1	NA	NA	0	0	0	0	0	0	0	0	0	0	0	0	0	0	3
denovo1171	Bacteria; __Bacteroidetes; __Flavobacteriia; __Flavobacteriales; __Flavobacteriaceae; __Flavobacterium; __Flavobacterium antarcticum	Bacteria	__Bacteroidetes	__Flavobacteriia	__Flavobacteriales	__Flavobacteriaceae	__Flavobacterium	__Flavobacterium antarcticum	1	1	NR_116887.2	NA	NA	0	0	3	0	0	0	0	0	0	0	0	0	0	0	0
denovo1172	Bacteria; __Proteobacteria; __Gammaproteobacteria; __Pseudomonadales; __Moraxellaceae; __Acinetobacter; __Acinetobacter defluvii	Bacteria	__Proteobacteria	__Gammaproteobacteria	__Pseudomonadales	__Moraxellaceae	__Acinetobacter	__Acinetobacter defluvii	1	1	NR_156989.1	NA	NA	0	0	0	0	0	0	0	0	0	0	0	0	0	0	3
denovo1173	Bacteria; __Proteobacteria; __Alphaproteobacteria; __Sphingomonadales; __Sphingomonadaceae; __Sphingomonas; __Sphingomonas agri	Bacteria	__Proteobacteria	__Alphaproteobacteria	__Sphingomonadales	__Sphingomonadaceae	__Sphingomonas	__Sphingomonas agri	1	1	NR_159163.1	NA	NA	0	0	0	0	0	0	0	0	0	0	0	0	0	0	3
denovo1174	Bacteria; __Actinobacteria; __Actinobacteria; __Corynebacteriales; __Corynebacteriaceae; __Corynebacterium; __Corynebacterium otitidis	Bacteria	__Actinobacteria	__Actinobacteria	__Corynebacteriales	__Corynebacteriaceae	__Corynebacterium	__Corynebacterium otitidis	1	1	NR_026120.1	NA	NA	0	0	0	0	0	0	0	0	0	0	0	0	0	0	3
denovo1175	; __; __; __; __; __; __		__	__	__	__	__	__	1	1	NA	NA	NA	0	0	0	0	3	0	0	0	0	0	0	0	0	0	0
denovo1176	Bacteria; __Cyanobacteria; __; __Nostocales; __Calotrichaceae; __Dulcicalothrix; __Dulcicalothrix necridiiformans	Bacteria	__Cyanobacteria	__	__Nostocales	__Calotrichaceae	__Dulcicalothrix	__Dulcicalothrix necridiiformans	1	1	NR_164867.1	NA	NA	0	0	0	0	0	0	1	2	0	0	0	0	0	0	0
denovo1177	Bacteria; __Bacteroidetes; __Flavobacteriia; __Flavobacteriales; __Flavobacteriaceae; __Flavobacterium; __Flavobacterium ummariense	Bacteria	__Bacteroidetes	__Flavobacteriia	__Flavobacteriales	__Flavobacteriaceae	__Flavobacterium	__Flavobacterium ummariense	1	1	NR_109092.1	NA	NA	0	0	0	0	0	0	0	0	0	0	0	0	0	0	3
denovo1178	; __; __; __; __; __; __		__	__	__	__	__	__	1	1	NA	NA	NA	0	0	0	0	3	0	0	0	0	0	0	0	0	0	0
denovo1179	; __; __; __; __; __; __		__	__	__	__	__	__	1	1	NA	NA	NA	0	0	0	0	0	0	0	0	0	0	0	0	0	3	0
denovo1180	Bacteria; __Proteobacteria; __Gammaproteobacteria; __Pseudomonadales; __Pseudomonadaceae; __Pseudomonas; __Pseudomonas punonensis	Bacteria	__Proteobacteria	__Gammaproteobacteria	__Pseudomonadales	__Pseudomonadaceae	__Pseudomonas	__Pseudomonas punonensis	1	1	NR_109583.1	NA	NA	0	0	0	0	0	0	0	3	0	0	0	0	0	0	0
denovo1181	Bacteria; __Proteobacteria; __Alphaproteobacteria; __Rhodobacterales; __Rhodobacteraceae; __Defluviimonas; __Defluviimonas nitratireducens	Bacteria	__Proteobacteria	__Alphaproteobacteria	__Rhodobacterales	__Rhodobacteraceae	__Defluviimonas	__Defluviimonas nitratireducens	1	1	NR_157785.1	NA	NA	0	0	0	0	0	0	0	0	0	0	0	3	0	0	0
denovo1182	Bacteria; __Bacteroidetes; __Flavobacteriia; __Flavobacteriales; __Flavobacteriaceae; __Lacinutrix; __Lacinutrix gracilariae	Bacteria	__Bacteroidetes	__Flavobacteriia	__Flavobacteriales	__Flavobacteriaceae	__Lacinutrix	__Lacinutrix gracilariae	1	1	NR_148656.1	NA	NA	0	0	0	0	0	0	0	0	0	0	0	1	2	0	0
denovo1183	; __; __; __; __; __; __		__	__	__	__	__	__	1	1	NA	NA	NA	0	0	3	0	0	0	0	0	0	0	0	0	0	0	0
denovo1184	Bacteria; __Actinobacteria; __Acidimicrobiia; __Acidimicrobiales; __Acidimicrobiaceae; __Aciditerrimonas; __Aciditerrimonas ferrireducens	Bacteria	__Actinobacteria	__Acidimicrobiia	__Acidimicrobiales	__Acidimicrobiaceae	__Aciditerrimonas	__Aciditerrimonas ferrireducens	1	1	NR_112972.1	NA	NA	0	0	0	0	0	0	0	0	0	0	0	0	0	0	3
denovo1185	Bacteria; __Bacteroidetes; __Flavobacteriia; __Flavobacteriales; __Cryomorphaceae; __Vicingus; __Vicingus serpentipes	Bacteria	__Bacteroidetes	__Flavobacteriia	__Flavobacteriales	__Cryomorphaceae	__Vicingus	__Vicingus serpentipes	1	1	NR_159281.1	NA	NA	0	0	0	0	0	0	0	0	0	0	0	0	0	0	3
denovo1186	Bacteria; __Proteobacteria; __Alphaproteobacteria; __Rhizobiales; __Rhodobiaceae; __Butyratibacter; __Butyratibacter algicola	Bacteria	__Proteobacteria	__Alphaproteobacteria	__Rhizobiales	__Rhodobiaceae	__Butyratibacter	__Butyratibacter algicola	1	1	NR_157992.1	NA	NA	0	0	0	0	0	0	0	0	0	0	0	0	0	3	0
denovo1187	; __; __; __; __; __; __		__	__	__	__	__	__	1	1	NA	NA	NA	0	0	0	0	0	0	0	0	0	3	0	0	0	0	0
denovo1188	Bacteria; __Proteobacteria; __Alphaproteobacteria; __Rhodobacterales; __Rhodobacteraceae; __Roseobacter; __Roseobacter denitrificans	Bacteria	__Proteobacteria	__Alphaproteobacteria	__Rhodobacterales	__Rhodobacteraceae	__Roseobacter	__Roseobacter denitrificans	1	1	NR_102909.1	NA	NA	0	0	0	0	0	0	0	0	0	0	0	0	0	3	0
denovo1189	Bacteria; __Proteobacteria; __Gammaproteobacteria; __Pseudomonadales; __Moraxellaceae; __Psychrobacter; __Psychrobacter piechaudii	Bacteria	__Proteobacteria	__Gammaproteobacteria	__Pseudomonadales	__Moraxellaceae	__Psychrobacter	__Psychrobacter piechaudii	1	1	NR_157989.1	NA	NA	3	0	0	0	0	0	0	0	0	0	0	0	0	0	0
denovo1190	Bacteria; __Proteobacteria; __Gammaproteobacteria; __Alteromonadales; __Alteromonadaceae; __Paraglaciecola; __Paraglaciecola psychrophila	Bacteria	__Proteobacteria	__Gammaproteobacteria	__Alteromonadales	__Alteromonadaceae	__Paraglaciecola	__Paraglaciecola psychrophila	1	1	NR_043463.1	NA	NA	0	0	0	3	0	0	0	0	0	0	0	0	0	0	0
denovo1191	Bacteria; __Proteobacteria; __Alphaproteobacteria; __Rhodobacterales; __Rhodobacteraceae; __Halocynthiibacter; __Halocynthiibacter namhaensis	Bacteria	__Proteobacteria	__Alphaproteobacteria	__Rhodobacterales	__Rhodobacteraceae	__Halocynthiibacter	__Halocynthiibacter namhaensis	1	1	NR_134052.1	NA	NA	0	0	0	0	0	0	0	0	0	0	3	0	0	0	0
denovo1192	; __; __; __; __; __; __		__	__	__	__	__	__	1	1	NA	NA	NA	0	0	0	0	0	0	0	0	0	0	0	3	0	0	0
denovo1193	Bacteria; __Actinobacteria; __Actinobacteria; __Propionibacteriales; __Nocardioidaceae; __Nocardioides; __Nocardioides exalbidus	Bacteria	__Actinobacteria	__Actinobacteria	__Propionibacteriales	__Nocardioidaceae	__Nocardioides	__Nocardioides exalbidus	1	1	NR_041526.1	NA	NA	0	0	0	0	0	0	0	0	0	0	0	0	0	0	3
denovo1194	Bacteria; __Proteobacteria; __Alphaproteobacteria; __Rhizobiales; __Aurantimonadaceae; __Aurantimonas; __Aureimonas phyllosphaerae	Bacteria	__Proteobacteria	__Alphaproteobacteria	__Rhizobiales	__Aurantimonadaceae	__Aurantimonas	__Aureimonas phyllosphaerae	1	1	NR_109590.1	NA	NA	0	0	0	0	0	0	0	0	0	0	0	0	0	0	3
denovo1195	; __; __; __; __; __; __		__	__	__	__	__	__	1	1	NA	NA	NA	0	3	0	0	0	0	0	0	0	0	0	0	0	0	0
denovo1196	; __; __; __; __; __; __		__	__	__	__	__	__	1	1	NA	NA	NA	0	0	0	0	0	0	0	0	0	0	0	0	0	3	0
denovo1197	Bacteria; __Firmicutes; __Bacilli; __Bacillales; __Staphylococcaceae; __Staphylococcus; __Staphylococcus epidermidis	Bacteria	__Firmicutes	__Bacilli	__Bacillales	__Staphylococcaceae	__Staphylococcus	__Staphylococcus epidermidis	1	1	NR_113957.1	NA	NA	3	0	0	0	0	0	0	0	0	0	0	0	0	0	0
denovo1198	Bacteria; __Proteobacteria; __Betaproteobacteria; __Burkholderiales; __Burkholderiaceae; __Ralstonia; __Ralstonia syzygii	Bacteria	__Proteobacteria	__Betaproteobacteria	__Burkholderiales	__Burkholderiaceae	__Ralstonia	__Ralstonia syzygii	1	1	NR_134149.1	NA	NA	3	0	0	0	0	0	0	0	0	0	0	0	0	0	0
denovo1199	Bacteria; __Proteobacteria; __Alphaproteobacteria; __Caulobacterales; __Caulobacteraceae; __Brevundimonas; __Brevundimonas mediterranea	Bacteria	__Proteobacteria	__Alphaproteobacteria	__Caulobacterales	__Caulobacteraceae	__Brevundimonas	__Brevundimonas mediterranea	1	1	NR_037108.1	NA	NA	0	0	0	0	0	0	0	0	0	0	0	0	0	0	3
denovo1200	Bacteria; __Planctomycetes; __Phycisphaerae; __Phycisphaerales; __Phycisphaeraceae; __Algisphaera; __Algisphaera agarilytica	Bacteria	__Planctomycetes	__Phycisphaerae	__Phycisphaerales	__Phycisphaeraceae	__Algisphaera	__Algisphaera agarilytica	1	1	NR_125472.1	NA	NA	0	0	0	0	0	0	0	0	0	0	0	0	0	3	0
denovo1201	Bacteria; __Proteobacteria; __Alphaproteobacteria; __Rhodobacterales; __Rhodobacteraceae; __Aestuariibius; __Aestuariibius insulae	Bacteria	__Proteobacteria	__Alphaproteobacteria	__Rhodobacterales	__Rhodobacteraceae	__Aestuariibius	__Aestuariibius insulae	1	1	NR_163664.1	NA	NA	0	0	0	0	3	0	0	0	0	0	0	0	0	0	0
denovo1202	Bacteria; __Proteobacteria; __Alphaproteobacteria; __Rhodobacterales; __Rhodobacteraceae; __Amylibacter; __Amylibacter cionae	Bacteria	__Proteobacteria	__Alphaproteobacteria	__Rhodobacterales	__Rhodobacteraceae	__Amylibacter	__Amylibacter cionae	1	1	NR_158032.1	NA	NA	0	0	0	0	0	0	0	0	0	3	0	0	0	0	0
denovo1203	; __; __; __; __; __; __		__	__	__	__	__	__	1	1	NA	NA	NA	0	0	0	0	0	0	0	0	0	0	0	0	0	3	0
denovo1204	Bacteria; __Bacteroidetes; __Flavobacteriia; __Flavobacteriales; __Flavobacteriaceae; __Bizionia; __Bizionia hallyeonensis	Bacteria	__Bacteroidetes	__Flavobacteriia	__Flavobacteriales	__Flavobacteriaceae	__Bizionia	__Bizionia hallyeonensis	1	1	NR_109525.1	NA	NA	0	0	0	0	0	0	0	0	0	0	3	0	0	0	0
denovo1205	Bacteria; __Bacteroidetes; __Bacteroidia; __Bacteroidales; __Porphyromonadaceae; __Porphyromonas; __Porphyromonas pasteri	Bacteria	__Bacteroidetes	__Bacteroidia	__Bacteroidales	__Porphyromonadaceae	__Porphyromonas	__Porphyromonas pasteri	1	1	NR_136788.1	NA	NA	0	0	0	0	0	0	0	0	0	0	0	0	0	0	3
denovo1206	Bacteria; __Bacteroidetes; __Flavobacteriia; __Flavobacteriales; __Cryomorphaceae; __Owenweeksia; __Owenweeksia hongkongensis	Bacteria	__Bacteroidetes	__Flavobacteriia	__Flavobacteriales	__Cryomorphaceae	__Owenweeksia	__Owenweeksia hongkongensis	1	1	NR_074100.1	NA	NA	0	0	0	0	0	0	0	0	0	0	0	0	3	0	0
denovo1207	Bacteria; __Proteobacteria; __Epsilonproteobacteria; __Campylobacterales; __Helicobacteraceae; __Sulfurimonas; __Sulfurimonas denitrificans	Bacteria	__Proteobacteria	__Epsilonproteobacteria	__Campylobacterales	__Helicobacteraceae	__Sulfurimonas	__Sulfurimonas denitrificans	1	1	NR_074133.1	NA	NA	0	0	0	0	0	0	0	0	0	0	1	2	0	0	0
denovo1208	; __; __; __; __; __; __		__	__	__	__	__	__	1	1	NA	NA	NA	0	0	0	0	0	0	0	0	0	0	0	0	0	0	3
denovo1209	; __; __; __; __; __; __		__	__	__	__	__	__	1	1	NA	NA	NA	0	0	0	0	0	0	0	0	0	0	0	3	0	0	0
denovo1210	Bacteria; __Proteobacteria; __Alphaproteobacteria; __Rhodospirillales; __Rhodospirillaceae; __Oceanibaculum; __Oceanibaculum pacificum	Bacteria	__Proteobacteria	__Alphaproteobacteria	__Rhodospirillales	__Rhodospirillaceae	__Oceanibaculum	__Oceanibaculum pacificum	1	1	NR_116679.1	NA	NA	0	0	1	0	0	1	0	0	1	0	0	0	0	0	0
denovo1211	Bacteria; __Bacteroidetes; __Saprospiria; __Saprospirales; __Lewinellaceae; __Lewinella; __Lewinella persica	Bacteria	__Bacteroidetes	__Saprospiria	__Saprospirales	__Lewinellaceae	__Lewinella	__Lewinella persica	1	1	NR_115014.1	NA	NA	0	0	0	0	3	0	0	0	0	0	0	0	0	0	0
denovo1212	Bacteria; __Bacteroidetes; __Flavobacteriia; __Flavobacteriales; __Flavobacteriaceae; __Ichthyenterobacterium; __Ichthyenterobacterium magnum	Bacteria	__Bacteroidetes	__Flavobacteriia	__Flavobacteriales	__Flavobacteriaceae	__Ichthyenterobacterium	__Ichthyenterobacterium magnum	1	1	NR_134750.1	NA	NA	0	0	0	3	0	0	0	0	0	0	0	0	0	0	0
denovo1213	Bacteria; __Proteobacteria; __Alphaproteobacteria; __Rhodobacterales; __Rhodobacteraceae; __Sulfitobacter; __Sulfitobacter mediterraneus	Bacteria	__Proteobacteria	__Alphaproteobacteria	__Rhodobacterales	__Rhodobacteraceae	__Sulfitobacter	__Sulfitobacter mediterraneus	1	1	NR_026472.1	NA	NA	3	0	0	0	0	0	0	0	0	0	0	0	0	0	0
denovo1214	Bacteria; __Bacteroidetes; __Flavobacteriia; __Flavobacteriales; __Cryomorphaceae; __Vicingus; __Vicingus serpentipes	Bacteria	__Bacteroidetes	__Flavobacteriia	__Flavobacteriales	__Cryomorphaceae	__Vicingus	__Vicingus serpentipes	1	1	NR_159281.1	NA	NA	0	0	0	0	0	0	0	0	0	0	0	0	3	0	0
denovo1215	Bacteria; __Firmicutes; __Bacilli; __Bacillales; __Staphylococcaceae; __Macrococcus; __Macrococcus brunensis	Bacteria	__Firmicutes	__Bacilli	__Bacillales	__Staphylococcaceae	__Macrococcus	__Macrococcus brunensis	1	1	NR_036847.1	NA	NA	3	0	0	0	0	0	0	0	0	0	0	0	0	0	0
denovo1216	Bacteria; __Proteobacteria; __Alphaproteobacteria; __Sphingomonadales; __Sphingomonadaceae; __Sphingomonas; __Sphingomonas olei	Bacteria	__Proteobacteria	__Alphaproteobacteria	__Sphingomonadales	__Sphingomonadaceae	__Sphingomonas	__Sphingomonas olei	1	1	NR_157757.1	NA	NA	0	0	1	0	0	0	0	0	0	0	0	0	0	0	2
denovo1217	Bacteria; __Proteobacteria; __Gammaproteobacteria; __Pseudomonadales; __Pseudomonadaceae; __Azotobacter; __Azotobacter nigricans	Bacteria	__Proteobacteria	__Gammaproteobacteria	__Pseudomonadales	__Pseudomonadaceae	__Azotobacter	__Azotobacter nigricans	1	1	NR_041033.1	NA	NA	0	1	0	0	0	2	0	0	0	0	0	0	0	0	0
denovo1218	Bacteria; __Bacteroidetes; __Flavobacteriia; __Flavobacteriales; __Cryomorphaceae; __Vicingus; __Vicingus serpentipes	Bacteria	__Bacteroidetes	__Flavobacteriia	__Flavobacteriales	__Cryomorphaceae	__Vicingus	__Vicingus serpentipes	1	1	NR_159281.1	NA	NA	0	1	0	0	0	2	0	0	0	0	0	0	0	0	0
denovo1219	Bacteria; __Proteobacteria; __Alphaproteobacteria; __Rhodobacterales; __Rhodobacteraceae; __Aliishimia; __Aliishimia ponticola	Bacteria	__Proteobacteria	__Alphaproteobacteria	__Rhodobacterales	__Rhodobacteraceae	__Aliishimia	__Aliishimia ponticola	1	1	NR_164623.1	NA	NA	0	0	0	0	3	0	0	0	0	0	2	0	0	1	0
denovo1220	Bacteria; __Bacteroidetes; __Flavobacteriia; __Flavobacteriales; __Flavobacteriaceae; __Maribacter; __Maribacter arcticus	Bacteria	__Bacteroidetes	__Flavobacteriia	__Flavobacteriales	__Flavobacteriaceae	__Maribacter	__Maribacter arcticus	1	1	NR_043176.1	NA	NA	0	1	0	0	0	0	0	1	0	0	1	0	0	0	0
denovo1221	Bacteria; __Acidobacteria; __Acidobacteriia; __Acidobacteriales; __Acidobacteriaceae; __Edaphobacter; __Edaphobacter acidisoli	Bacteria	__Acidobacteria	__Acidobacteriia	__Acidobacteriales	__Acidobacteriaceae	__Edaphobacter	__Edaphobacter acidisoli	1	1	NR_158119.1	NA	NA	0	0	0	0	0	0	0	0	0	0	0	0	0	0	3
denovo1222	Bacteria; __Proteobacteria; __Betaproteobacteria; __Neisseriales; __Neisseriaceae; __Snodgrassella; __Snodgrassella alvi	Bacteria	__Proteobacteria	__Betaproteobacteria	__Neisseriales	__Neisseriaceae	__Snodgrassella	__Snodgrassella alvi	1	1	NR_121735.2	NA	NA	0	0	0	0	0	0	0	0	0	0	0	0	0	0	3
denovo1223	Bacteria; __Proteobacteria; __Alphaproteobacteria; __Pelagibacterales; __Pelagibacteraceae; __Candidatus Pelagibacter; __Candidatus Pelagibacter ubique	Bacteria	__Proteobacteria	__Alphaproteobacteria	__Pelagibacterales	__Pelagibacteraceae	__Candidatus Pelagibacter	__Candidatus Pelagibacter ubique	1	1	NR_074224.1	NA	NA	0	0	0	0	3	0	0	0	0	0	0	0	0	0	0
denovo1224	Bacteria; __Bacteroidetes; __Flavobacteriia; __Flavobacteriales; __Flavobacteriaceae; __Winogradskyella; __Winogradskyella wandonensis	Bacteria	__Bacteroidetes	__Flavobacteriia	__Flavobacteriales	__Flavobacteriaceae	__Winogradskyella	__Winogradskyella wandonensis	1	1	NR_133892.1	NA	NA	0	0	0	0	0	0	3	0	0	0	0	0	0	0	0
denovo1225	Bacteria; __Bacteroidetes; __Flavobacteriia; __Flavobacteriales; __Flavobacteriaceae; __Tenacibaculum; __Tenacibaculum haliotis	Bacteria	__Bacteroidetes	__Flavobacteriia	__Flavobacteriales	__Flavobacteriaceae	__Tenacibaculum	__Tenacibaculum haliotis	1	1	NR_158003.1	NA	NA	0	0	0	0	3	0	0	0	0	0	0	0	0	0	0
denovo1226	Bacteria; __Firmicutes; __Bacilli; __Lactobacillales; __Aerococcaceae; __Aerococcus; __Aerococcus viridans	Bacteria	__Firmicutes	__Bacilli	__Lactobacillales	__Aerococcaceae	__Aerococcus	__Aerococcus viridans	1	1	NR_104708.1	NA	NA	3	0	0	0	0	0	0	0	0	0	0	0	0	0	0
denovo1227	Bacteria; __Proteobacteria; __Gammaproteobacteria; __Oceanospirillales; __Oceanospirillaceae; __Neptuniibacter; __Neptuniibacter halophilus	Bacteria	__Proteobacteria	__Gammaproteobacteria	__Oceanospirillales	__Oceanospirillaceae	__Neptuniibacter	__Neptuniibacter halophilus	1	1	NR_108534.1	NA	NA	0	0	0	0	0	0	3	0	0	0	0	0	0	0	0
denovo1228	Bacteria; __Proteobacteria; __Oligoflexia; __Bdellovibrionales; __Bdellovibrionaceae; __Bdellovibrio; __Bdellovibrio bacteriovorus	Bacteria	__Proteobacteria	__Oligoflexia	__Bdellovibrionales	__Bdellovibrionaceae	__Bdellovibrio	__Bdellovibrio bacteriovorus	1	1	NR_027553.1	NA	NA	0	0	0	0	0	0	0	0	0	0	0	0	0	0	3
denovo1229	Bacteria; __Bacteroidetes; __Flavobacteriia; __Flavobacteriales; __Flavobacteriaceae; __Lacinutrix; __Lacinutrix venerupis	Bacteria	__Bacteroidetes	__Flavobacteriia	__Flavobacteriales	__Flavobacteriaceae	__Lacinutrix	__Lacinutrix venerupis	1	1	NR_145942.1	NA	NA	0	0	0	3	0	0	0	0	0	0	0	0	0	0	0
denovo1230	Bacteria; __Bacteroidetes; __Flavobacteriia; __Flavobacteriales; __Cryomorphaceae; __Vicingus; __Vicingus serpentipes	Bacteria	__Bacteroidetes	__Flavobacteriia	__Flavobacteriales	__Cryomorphaceae	__Vicingus	__Vicingus serpentipes	1	1	NR_159281.1	NA	NA	0	0	0	0	0	0	0	0	0	0	0	0	0	3	0
denovo1231	; __; __; __; __; __; __		__	__	__	__	__	__	1	1	NA	NA	NA	0	0	0	0	3	0	0	0	0	0	0	0	0	0	0
denovo1232	Bacteria; __Bacteroidetes; __Flavobacteriia; __Flavobacteriales; __Flavobacteriaceae; __Polaribacter; __Polaribacter litorisediminis	Bacteria	__Bacteroidetes	__Flavobacteriia	__Flavobacteriales	__Flavobacteriaceae	__Polaribacter	__Polaribacter litorisediminis	1	1	NR_156971.1	NA	NA	0	0	0	0	0	0	0	0	0	0	0	0	3	0	0
denovo1233	Bacteria; __Bacteroidetes; __Saprospiria; __Saprospirales; __Haliscomenobacteraceae; __Portibacter; __Portibacter lacus	Bacteria	__Bacteroidetes	__Saprospiria	__Saprospirales	__Haliscomenobacteraceae	__Portibacter	__Portibacter lacus	1	1	NR_113569.1	NA	NA	0	0	0	0	0	0	0	3	0	0	0	0	0	0	0
denovo1234	Bacteria; __Proteobacteria; __Alphaproteobacteria; __Rhizobiales; __Rhodobiaceae; __Butyratibacter; __Butyratibacter algicola	Bacteria	__Proteobacteria	__Alphaproteobacteria	__Rhizobiales	__Rhodobiaceae	__Butyratibacter	__Butyratibacter algicola	1	1	NR_157992.1	NA	NA	0	0	0	0	0	0	0	0	1	0	0	0	0	2	0
denovo1235	Bacteria; __Actinobacteria; __Actinobacteria; __Actinomycetales; __Actinomycetaceae; __Schaalia; __Schaalia odontolytica	Bacteria	__Actinobacteria	__Actinobacteria	__Actinomycetales	__Actinomycetaceae	__Schaalia	__Schaalia odontolytica	1	1	NR_114395.1	NA	NA	0	0	0	0	0	0	0	0	0	0	0	0	0	0	3
denovo1236	; __; __; __; __; __; __		__	__	__	__	__	__	1	1	NA	NA	NA	0	0	0	0	0	0	0	0	0	0	0	0	0	3	0
denovo1237	; __; __; __; __; __; __		__	__	__	__	__	__	1	1	NA	NA	NA	0	0	0	0	0	0	0	0	0	0	0	0	3	0	0
denovo1238	Bacteria; __Actinobacteria; __Actinobacteria; __Geodermatophilales; __Geodermatophilaceae; __Blastococcus; __Blastococcus aggregatus	Bacteria	__Actinobacteria	__Actinobacteria	__Geodermatophilales	__Geodermatophilaceae	__Blastococcus	__Blastococcus aggregatus	1	1	NR_114864.1	NA	NA	0	0	0	0	0	2	0	0	0	0	0	0	0	0	1
denovo1239	Bacteria; __Proteobacteria; __Deltaproteobacteria; __Myxococcales; __Nannocystaceae; __Nannocystis; __Nannocystis exedens	Bacteria	__Proteobacteria	__Deltaproteobacteria	__Myxococcales	__Nannocystaceae	__Nannocystis	__Nannocystis exedens	1	1	NR_040928.1	NA	NA	0	0	2	0	0	1	0	0	0	0	0	0	0	0	0
denovo1240	Bacteria; __Proteobacteria; __Alphaproteobacteria; __Pelagibacterales; __Pelagibacteraceae; __Candidatus Pelagibacter; __Candidatus Pelagibacter ubique	Bacteria	__Proteobacteria	__Alphaproteobacteria	__Pelagibacterales	__Pelagibacteraceae	__Candidatus Pelagibacter	__Candidatus Pelagibacter ubique	1	1	NR_074224.1	NA	NA	0	0	0	0	0	0	0	3	0	0	0	0	0	0	0
denovo1241	Bacteria; __Proteobacteria; __Gammaproteobacteria; __Alteromonadales; __Alteromonadaceae; __Alkalimarinus; __Alkalimarinus sediminis	Bacteria	__Proteobacteria	__Gammaproteobacteria	__Alteromonadales	__Alteromonadaceae	__Alkalimarinus	__Alkalimarinus sediminis	1	1	NR_137384.1	NA	NA	0	0	0	0	0	0	0	0	0	0	0	3	0	0	0
denovo1242	Bacteria; __Proteobacteria; __Alphaproteobacteria; __Rhizobiales; __Hyphomicrobiaceae; __Devosia; __Devosia riboflavina	Bacteria	__Proteobacteria	__Alphaproteobacteria	__Rhizobiales	__Hyphomicrobiaceae	__Devosia	__Devosia riboflavina	1	1	NR_113618.1	NA	NA	0	0	0	0	0	0	0	0	0	0	0	0	0	0	3
denovo1243	Bacteria; __Cyanobacteria; __; __Pleurocapsales; __Xenococcaceae; __Foliisarcina; __Foliisarcina bertiogensis	Bacteria	__Cyanobacteria	__	__Pleurocapsales	__Xenococcaceae	__Foliisarcina	__Foliisarcina bertiogensis	1	1	NR_148664.1	NA	NA	0	0	0	0	3	0	0	0	0	0	0	0	0	0	0
denovo1244	Bacteria; __Bacteroidetes; __Cytophagia; __Cytophagales; __Flammeovirgaceae; __Imperialibacter; __Imperialibacter roseus	Bacteria	__Bacteroidetes	__Cytophagia	__Cytophagales	__Flammeovirgaceae	__Imperialibacter	__Imperialibacter roseus	1	1	NR_132295.1	NA	NA	0	0	0	0	0	3	0	0	0	0	0	0	0	0	0
denovo1245	; __; __; __; __; __; __		__	__	__	__	__	__	1	1	NA	NA	NA	0	0	0	0	0	0	0	0	0	0	0	0	0	3	0
denovo1246	; __; __; __; __; __; __		__	__	__	__	__	__	1	1	NA	NA	NA	0	0	3	0	0	0	0	0	0	0	0	0	0	0	0
denovo1247	; __; __; __; __; __; __		__	__	__	__	__	__	1	1	NA	NA	NA	0	0	0	0	0	0	0	0	0	0	1	1	0	1	0
denovo1248	Bacteria; __Bacteroidetes; __Flavobacteriia; __Flavobacteriales; __Cryomorphaceae; __Vicingus; __Vicingus serpentipes	Bacteria	__Bacteroidetes	__Flavobacteriia	__Flavobacteriales	__Cryomorphaceae	__Vicingus	__Vicingus serpentipes	1	1	NR_159281.1	NA	NA	0	0	3	0	0	0	0	0	0	0	0	0	0	0	0
denovo1249	Bacteria; __Proteobacteria; __Gammaproteobacteria; __Alteromonadales; __Pseudoalteromonadaceae; __Pseudoalteromonas; __Pseudoalteromonas neustonica	Bacteria	__Proteobacteria	__Gammaproteobacteria	__Alteromonadales	__Pseudoalteromonadaceae	__Pseudoalteromonas	__Pseudoalteromonas neustonica	1	1	NR_151996.1	NA	NA	0	0	0	0	0	0	0	0	0	0	0	3	0	0	0
denovo1250	; __; __; __; __; __; __		__	__	__	__	__	__	1	1	NA	NA	NA	0	0	0	0	3	0	0	0	0	0	0	0	0	0	0
denovo1251	Bacteria; __Proteobacteria; __Alphaproteobacteria; __Pelagibacterales; __Pelagibacteraceae; __Candidatus Pelagibacter; __Candidatus Pelagibacter ubique	Bacteria	__Proteobacteria	__Alphaproteobacteria	__Pelagibacterales	__Pelagibacteraceae	__Candidatus Pelagibacter	__Candidatus Pelagibacter ubique	1	1	NR_074224.1	NA	NA	0	0	3	0	0	0	0	0	0	0	0	0	0	0	0
denovo1252	Bacteria; __Rhodothermaeota; __Rhodothermia; __Rhodothermales; __Rubricoccaceae; __Rubrivirga; __Rubrivirga profundi	Bacteria	__Rhodothermaeota	__Rhodothermia	__Rhodothermales	__Rubricoccaceae	__Rubrivirga	__Rubrivirga profundi	1	1	NR_151960.1	NA	NA	0	0	0	0	0	0	0	0	0	0	0	0	1	2	0
denovo1253	Bacteria; __Nitrospinae; __Nitrospinia; __Nitrospinales; __Nitrospinaceae; __Nitrospina; __Nitrospina gracilis	Bacteria	__Nitrospinae	__Nitrospinia	__Nitrospinales	__Nitrospinaceae	__Nitrospina	__Nitrospina gracilis	1	1	NR_104821.1	NA	NA	0	0	0	0	0	0	0	0	0	0	0	0	0	3	0
denovo1254	; __; __; __; __; __; __		__	__	__	__	__	__	1	1	NA	NA	NA	0	0	0	0	0	0	0	0	0	0	0	3	0	0	0
