# Supplementary material for: Contrasting Marine Microbial Communities of the Fram Strait with the First Confirmed Record of Cyanobacteria Prochlorococcus marinus in the Arctic Region
Source: Biology (Basel). 2023 Sep 17;12(9):1246. doi: 10.3390/biology12091246 (PMC10525857; doi:10.3390/biology12091246)
Supplement: Supplementary file 1 [file biology-12-01246-s001.zip › Table S3.xlsx]

## Sheet: Table S3
Table S3. Estimates of evolutionary divergence between 16S rRNA sequences based on p–distances. Clade A is indicated in blue and clade B in green. Black asterisks indicate 16S rRNA sequences of OTUs of the genus Prochlorococcus from the study of Sunagawa et al. (2015); pink asterisk indicates Prochlorococcus OTU found in the Antarctic Province. Sequences downloaded from GenBank are marked in blue.
CLADE A	Prochlorococcus marinus (OTU denovo 12, our study)
	Prochlorococcus sp. (OTU1443)*	0.00260417
	Prochlorococcus sp. (OTU1436)**	0.0104167	0.0078125
	Prochlorococcus sp. (OTU1450)*	0.0390625	0.0364583	0.0338542
	Prochlorococcus sp. (OTU1411)*	0.0546875	0.0520833	0.0494792	0.0390625
	Prochlorococcus sp. (OTU1444)*	0.046875	0.0442708	0.0390625	0.03125	0.0208333
	Prochlorococcus sp. (OTU1478)*	0.0494792	0.046875	0.046875	0.0364583	0.0260417	0.0260417
	Prochlorococcus sp. (OTU1271)*	0.0494792	0.046875	0.046875	0.03125	0.0260417	0.03125	0.0390625
	Prochlorococcus sp. (OTU1343)*	0.0234375	0.0208333	0.0234375	0.03125	0.0546875	0.046875	0.0442708	0.0390625
	Prochlorococcus sp. (OTU1447)*	0.0130208	0.0104167	0.0078125	0.0338542	0.0442708	0.0390625	0.0416667	0.046875	0.0208333
	Prochlorococcus sp. (OTU1431)*	0.0130208	0.0104167	0.0078125	0.0338542	0.0442708	0.0390625	0.0416667	0.046875	0.0208333	0
	Prochlorococcus sp. (OTU1451)*	0.0182292	0.015625	0.0130208	0.0390625	0.0494792	0.0442708	0.046875	0.0520833	0.0260417	0.00520833	0.00520833
	Prochlorococcus sp. (OTU1320)*	0.015625	0.0130208	0.0104167	0.03125	0.0416667	0.0364583	0.0390625	0.0442708	0.0234375	0.00260417	0.00260417	0.0078125
	Prochlorococcus sp. (OTU1448)*	0.0171875	0.0169271	0.0171875	0.0174479	0.0171875	0.0169271	0.0177083	0.0182292	0.0179687	0.0166667	0.0166667	0.0171875	0.0166667
	Prochlorococcus marinus subsp. pastoris (GenBank: AF311218)	0.0260417	0.0234375	0.0208333	0.0364583	0.046875	0.0416667	0.0442708	0.0494792	0.0364583	0.015625	0.015625	0.0208333	0.0130208	0.0164063
	Prochlorococcus sp. (OTU1321)*	0.0286458	0.0260417	0.0234375	0.0390625	0.0494792	0.0442708	0.046875	0.0520833	0.0390625	0.0182292	0.0182292	0.0234375	0.015625	0.0161458	0.00260417
	Prochlorococcus marinus (GenBank: CP000552)	0.0286458	0.0260417	0.0234375	0.0338542	0.0442708	0.0390625	0.046875	0.046875	0.0390625	0.0182292	0.0182292	0.0234375	0.015625	0.0166667	0.00520833	0.0078125
	Prochlorococcus sp. (GenBank: AF133834)	0.03125	0.0286458	0.0260417	0.03125	0.0416667	0.0364583	0.0442708	0.0442708	0.0416667	0.0208333	0.0208333	0.0260417	0.0182292	0.0166667	0.0078125	0.0104167	0.00260417
	Prochlorococcus sp. (OTU1473)*	0.0364583	0.0338542	0.03125	0.0364583	0.0494792	0.0390625	0.0520833	0.0494792	0.046875	0.0286458	0.0286458	0.0338542	0.0260417	0.0174479	0.015625	0.0182292	0.0104167	0.0078125
	Prochlorococcus sp. (OTU1207)*	0.0338542	0.03125	0.0286458	0.0338542	0.0442708	0.0390625	0.046875	0.046875	0.0442708	0.0234375	0.0234375	0.0286458	0.0208333	0.0161458	0.0078125	0.0104167	0.0078125	0.00520833	0.0130208
	Prochlorococcus sp. (OTU1205)*	0.0338542	0.03125	0.0260417	0.0338542	0.0416667	0.0390625	0.0442708	0.0442708	0.0442708	0.0234375	0.0234375	0.0286458	0.0208333	0.0166667	0.0104167	0.0130208	0.0078125	0.0104167	0.0182292	0.0078125
	Prochlorococcus sp. (OTU1311)*	0.0364583	0.0338542	0.0286458	0.0364583	0.0442708	0.0416667	0.046875	0.046875	0.046875	0.0260417	0.0260417	0.03125	0.0234375	0.0169271	0.0130208	0.015625	0.0104167	0.0130208	0.0208333	0.0104167	0.00260417
	Prochlorococcus sp. (OTU1442)*	0.03125	0.0286458	0.0234375	0.0364583	0.0442708	0.0416667	0.0416667	0.046875	0.0416667	0.0208333	0.0208333	0.0260417	0.0182292	0.0166667	0.0078125	0.0104167	0.0104167	0.0130208	0.0208333	0.0104167	0.00260417	0.00520833
	Prochlorococcus sp. (OTU1230)*	0.0286458	0.0260417	0.0208333	0.0338542	0.0416667	0.0390625	0.0390625	0.0442708	0.0390625	0.0182292	0.0182292	0.0234375	0.015625	0.0164063	0.0104167	0.0130208	0.0130208	0.015625	0.0234375	0.0130208	0.00520833	0.0078125	0.00260417
	Prochlorococcus sp. (OTU1385)*	0.0416667	0.0390625	0.0338542	0.0416667	0.0494792	0.046875	0.0520833	0.0520833	0.0520833	0.03125	0.03125	0.0364583	0.0286458	0.0174479	0.0182292	0.0208333	0.015625	0.0182292	0.0260417	0.015625	0.0078125	0.0104167	0.0104167	0.0130208
	Prochlorococcus sp. (OTU1404)*	0.0364583	0.0338542	0.0286458	0.0364583	0.0442708	0.0416667	0.046875	0.046875	0.046875	0.0260417	0.0260417	0.03125	0.0234375	0.0169271	0.0130208	0.015625	0.0104167	0.0130208	0.0208333	0.0104167	0.00260417	0.00520833	0.00520833	0.0078125	0.0104167
	Prochlorococcus sp. (OTU1426)*	0.0364583	0.0338542	0.0286458	0.0364583	0.0442708	0.0416667	0.046875	0.046875	0.046875	0.0260417	0.0260417	0.03125	0.0234375	0.0169271	0.0130208	0.015625	0.0104167	0.0130208	0.0208333	0.0104167	0.00260417	0.00520833	0.00520833	0.0078125	0.0104167	0.00520833
	Prochlorococcus sp. (OTU1445)*	0.0364583	0.0338542	0.0286458	0.0364583	0.0442708	0.0416667	0.046875	0.046875	0.046875	0.0260417	0.0260417	0.03125	0.0234375	0.0166667	0.0130208	0.015625	0.0104167	0.0130208	0.0208333	0.0104167	0.00260417	0.00520833	0.00520833	0.0078125	0.0104167	0.00520833	0.00520833
	Prochlorococcus sp. (OTU1365)*	0.0520833	0.0494792	0.0442708	0.0520833	0.0598958	0.0572917	0.0625	0.0625	0.0625	0.0416667	0.0416667	0.046875	0.0390625	0.0182292	0.0286458	0.03125	0.0260417	0.0286458	0.0364583	0.0260417	0.0182292	0.0208333	0.0208333	0.0234375	0.0260417	0.0208333	0.0208333	0.0208333
	Prochlorococcus sp. (OTU1447)*	0.0338542	0.03125	0.0260417	0.0338542	0.0416667	0.0390625	0.0442708	0.0442708	0.0442708	0.0234375	0.0234375	0.0286458	0.0208333	0.0166667	0.0104167	0.0130208	0.0078125	0.0104167	0.0182292	0.0078125	0	0.00260417	0.00260417	0.00520833	0.0078125	0.00260417	0.00260417	0.00260417	0.0182292
	Prochlorococcus sp. (OTU1462)*	0.0364583	0.0338542	0.0286458	0.0364583	0.0442708	0.0416667	0.046875	0.046875	0.046875	0.0260417	0.0260417	0.03125	0.0234375	0.0169271	0.0130208	0.015625	0.0104167	0.0130208	0.0208333	0.0104167	0.00260417	0.00520833	0.00520833	0.0078125	0.0104167	0.00520833	0.00520833	0.00520833	0.0208333	0.00260417
CLADE B	Prochlorococcus sp. (OTU1377)*	0.09375	0.0911458	0.0859375	0.09375	0.106771	0.101562	0.104167	0.104167	0.104167	0.0885417	0.0885417	0.09375	0.0859375	0.200521	0.078125	0.0807292	0.0755208	0.078125	0.078125	0.0755208	0.0677083	0.0703125	0.0703125	0.0703125	0.0755208	0.0703125	0.0703125	0.0651042	0.0833333	0.0677083	0.0703125
	Prochlorococcus sp. (OTU1373)*	0.125	0.122396	0.117188	0.125	0.135417	0.132812	0.135417	0.135417	0.135417	0.119792	0.119792	0.119792	0.117188	0.226562	0.111979	0.114583	0.109375	0.111979	0.111979	0.109375	0.101562	0.104167	0.104167	0.101562	0.109375	0.104167	0.104167	0.0989583	0.117188	0.101562	0.104167	0.0598958
	Prochlorococcus sp. (OTU1454)*	0.0989583	0.0963542	0.0911458	0.0989583	0.111979	0.106771	0.114583	0.109375	0.109375	0.09375	0.09375	0.0989583	0.0911458	0.205729	0.0859375	0.0885417	0.0833333	0.0859375	0.0859375	0.0833333	0.0755208	0.078125	0.078125	0.0755208	0.0833333	0.078125	0.078125	0.0729167	0.0911458	0.0755208	0.078125	0.0520833	0.0390625
	Prochlorococcus sp. (OTU1454)*	0.0911458	0.0885417	0.0833333	0.0963542	0.106771	0.101562	0.104167	0.106771	0.101562	0.0833333	0.0833333	0.0885417	0.0807292	0.216146	0.0729167	0.0755208	0.0755208	0.078125	0.0755208	0.0755208	0.0677083	0.0703125	0.0651042	0.0651042	0.0755208	0.0703125	0.0703125	0.0651042	0.0833333	0.0677083	0.0703125	0.0572917	0.078125	0.0651042
	Prochlorococcus sp. (OTU1455)*	0.111979	0.109375	0.104167	0.111979	0.122396	0.117188	0.125	0.122396	0.122396	0.104167	0.104167	0.109375	0.101562	0.21875	0.09375	0.0963542	0.0911458	0.09375	0.09375	0.0911458	0.0833333	0.0859375	0.0859375	0.0859375	0.0911458	0.0859375	0.0859375	0.0807292	0.0989583	0.0833333	0.0859375	0.0546875	0.0755208	0.0572917	0.0338542
