# Supplementary figures and images for: Contrasting Marine Microbial Communities of the Fram Strait with the First Confirmed Record of Cyanobacteria Prochlorococcus marinus in the Arctic Region
Source: MDPI journal article supplement (doi:10.3390/biology12091246), 2023-09-17

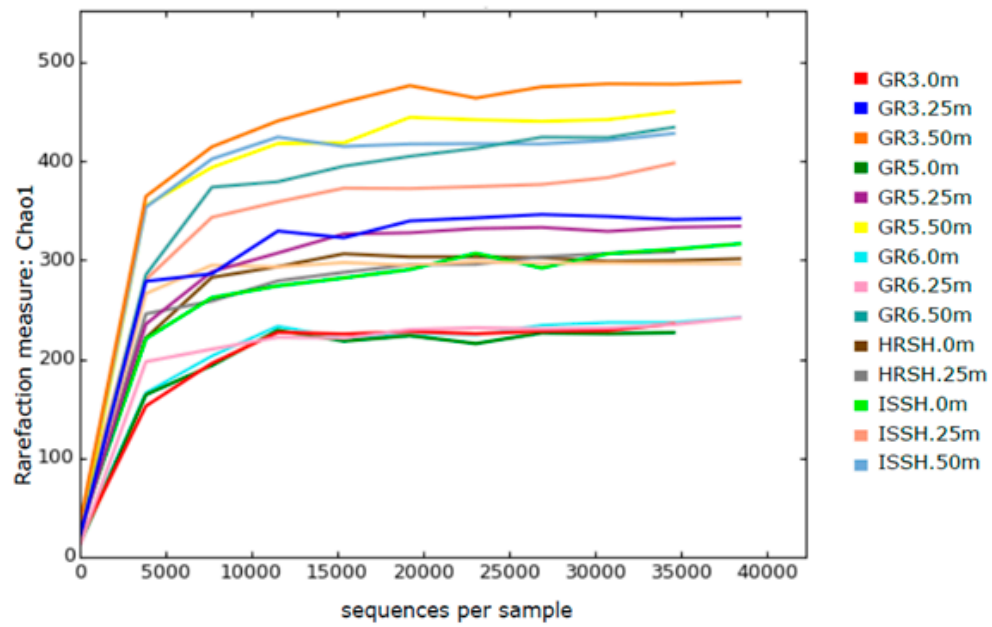

**Figure S1.** Alpha rarefaction curve.

Supplement: s1 [file s1]
